# Supplementary material for: CRISPR Screens Provide a Comprehensive Assessment of Cancer Vulnerabilities but Generate False-Positive Hits for Highly Amplified Genomic Regions
Source: Oxford University Press journal article supplement (doi:10.1158/2159-8290.cd-16-0178), 2016-06-03
Supplement: 21598290cd160178-sup-162212_1_supp_3485174_h6wyyh.xlsx [file 21598290cd160178-sup-162212_1_supp_3485174_h6wyyh.xlsx]

## Sheet: Sheet1
Gene Symbol	Crispr ID	sgRNA sequence	MKN-45 Z-score	SF-268 Z-score	RKO Z-score	DLD1 Z-score	HT1080 Z-score	DLD1 RNA-seq	HT1080 RNA-seq	MKN45 RNA-seq	RKO RNA-seq	SF268 RNA-seq
A1CF	A1CF_29974_4_6	GGAAGCAGCCCTCCGCGCAC	-0.20861	-0.25761	0.207386	-0.527447	-0.131807	0.00204804	0.0224985	0.0539594	0.081772	0.00191337
A1CF	A1CF_sgA1CF_8	AAAGAGAGAAGAAATCTTAT	0.702794	-0.0665393	1.10644	0.635723	0.244649	0.00204804	0.0224985	0.0539594	0.081772	0.00191337
A1CF	A1CF_sgA1CF_4	AAGTTGCTTGATTGCATTCT	-1.01625	-0.797406	-0.0724305	-0.0861727	0.508999	0.00204804	0.0224985	0.0539594	0.081772	0.00191337
A1CF	A1CF_sgA1CF_3	GGTGCAGCATCCCAACCAGG	-0.999159	0.123711	-0.757129	0.667029	0.160694	0.00204804	0.0224985	0.0539594	0.081772	0.00191337
A1CF	A1CF_29974_5_2	GACACACTGCTTCCATCTAT	-1.16591	0.177269	-0.284229	0.228977	0.712673	0.00204804	0.0224985	0.0539594	0.081772	0.00191337
A1CF	A1CF_29974_5_1	GCTGTGCTCATGCTCGCTTC	0.183808	0.396795	0.131793	0.568739	0.989117	0.00204804	0.0224985	0.0539594	0.081772	0.00191337
A1CF	A1CF_sgA1CF_5	GCAGAAATGGGCGCCTCTTA	-0.173003	-0.0135905	-0.156102	0.701839	0.45292	0.00204804	0.0224985	0.0539594	0.081772	0.00191337
A1CF	A1CF_29974_4_3	AGTGCCGCTCAATCCATCCC	-0.113446	-0.0210448	0.89419	0.824272	0.0122183	0.00204804	0.0224985	0.0539594	0.081772	0.00191337
A1CF	A1CF_sgA1CF_1	AAATATGGTGGCCCTCCACC	-0.132275	-0.284573	0.732541	0.00730717	0.459061	0.00204804	0.0224985	0.0539594	0.081772	0.00191337
A1CF	A1CF_29974_4_2	CTGTGCGCTGGACCAGTGCG	0.0997783	-0.018028	0.495027	0.877889	-0.107015	0.00204804	0.0224985	0.0539594	0.081772	0.00191337
A1CF	A1CF_sgA1CF_9	ACTCCACGAAGGCAAAGCCT	-0.168628	0.503731	0.800353	0.67918	0.939136	0.00204804	0.0224985	0.0539594	0.081772	0.00191337
A1CF	A1CF_29974_4_1	CCAAGCTATATCCTGTGCGC	-1.06255	-1.74144	-1.0248	-1.38305	-1.69707	0.00204804	0.0224985	0.0539594	0.081772	0.00191337
A1CF	A1CF_29974_4_5	CGCGCACTGGTCCAGCGCAC	0.755168	-0.234442	-0.288093	0.414542	0.659063	0.00204804	0.0224985	0.0539594	0.081772	0.00191337
A1CF	A1CF_29974_4_4	CCAGCGCACAGGATATAGCT	1.04827	0.162994	0.662583	-0.0246209	1.2909	0.00204804	0.0224985	0.0539594	0.081772	0.00191337
A1CF	A1CF_sgA1CF_2	TGGTGGCCCTCCACCTGGTT	0.408637	0.25444	-0.393751	0.7049	-0.282702	0.00204804	0.0224985	0.0539594	0.081772	0.00191337
A1CF	A1CF_sgA1CF_6	TAATCGGCAGTTGTCCACAC	0.428686	0.320953	0.78169	0.601312	1.04448	0.00204804	0.0224985	0.0539594	0.081772	0.00191337
A1CF	A1CF_29974_5_4	TAGATGGAAGCAGTGTGTCT	-0.761739	0.272421	0.0634969	-0.530518	-0.638075	0.00204804	0.0224985	0.0539594	0.081772	0.00191337
A1CF	A1CF_29974_4_7	TGGATTGAGCGGCACTCAGA	0.440207	0.7473	0.016846	0.173565	0.0805049	0.00204804	0.0224985	0.0539594	0.081772	0.00191337
A1CF	A1CF_sgA1CF_7	ACAACTGCCGATTATTTGTT	0.341195	0.494118	0.67785	1.40584	1.14952	0.00204804	0.0224985	0.0539594	0.081772	0.00191337
A1CF	A1CF_sgA1CF_10	ATGACTCTCATACTCCACGA	-0.383599	-0.0746788	0.29806	0.151475	-0.235421	0.00204804	0.0224985	0.0539594	0.081772	0.00191337
AAAS	AAAS_sgAAAS_3	ATATGAGCACAATAACGAGC	-1.08349	-1.73644	-1.01079	-0.848332	-2.53764	29.4905	48.852	41.8041	20.0048	43.922
AAAS	AAAS_8086_4_7	AGTGTTTGAGTGGGTGAAGA	-0.973505	-0.495204	-0.534073	-0.509276	0.25194	29.4905	48.852	41.8041	20.0048	43.922
AAAS	AAAS_8086_1_10	TTCCCTCCTCCACCGCCTCG	-1.13127	-1.21651	-0.999375	-1.55218	-0.289734	29.4905	48.852	41.8041	20.0048	43.922
AAAS	AAAS_sgAAAS_4	CACAATAACGAGCTGGTGAC	-0.226986	-0.270824	-0.643623	-0.265053	0.38543	29.4905	48.852	41.8041	20.0048	43.922
AAAS	AAAS_8086_1_1	AGCACATCTTGCCGGTTCGC	-1.40749	-1.46477	0.0811872	-1.35844	-0.778454	29.4905	48.852	41.8041	20.0048	43.922
AAAS	AAAS_sgAAAS_2	GTTCCCTCCTCCACCGCCTC	-1.83769	-1.62123	-0.584631	-1.37122	-0.704161	29.4905	48.852	41.8041	20.0048	43.922
AAAS	AAAS_sgAAAS_6	GTGCCATGGTCCAGCCTTCC	1.18968	-0.0547244	0.961771	0.842515	0.141315	29.4905	48.852	41.8041	20.0048	43.922
AAAS	AAAS_sgAAAS_10	TCCACACTTGCTCCCGGTGA	-2.59429	-1.43362	-1.02648	-1.45186	-1.63564	29.4905	48.852	41.8041	20.0048	43.922
AAAS	AAAS_sgAAAS_7	TGAAGGCAGTTCTTGTGCCA	0.0577055	-0.562162	-1.41813	-0.374883	0.427588	29.4905	48.852	41.8041	20.0048	43.922
AAAS	AAAS_sgAAAS_5	TCCTTTGTCAGTTGTAGGAC	-0.539367	-0.380768	-1.01461	-1.24683	-0.882403	29.4905	48.852	41.8041	20.0048	43.922
AAAS	AAAS_sgAAAS_1	ACCGGCAAGATGTGCTCTCT	-0.282739	-1.08767	0.36348	-0.648711	0.0697095	29.4905	48.852	41.8041	20.0048	43.922
AAAS	AAAS_sgAAAS_8	AACTGCCTTCATCCATCACC	-0.738801	-0.542845	-0.20785	-1.24152	0.11216	29.4905	48.852	41.8041	20.0048	43.922
AAAS	AAAS_8086_2_1	ATCTCTTCCACACTTGCTCC	-1.72144	-0.654602	-1.54073	-0.36729	-0.597522	29.4905	48.852	41.8041	20.0048	43.922
AAAS	AAAS_8086_2_8	TCCTGTCCTACAACTGACAA	0.777668	0.590293	0.487943	0.468102	0.0693914	29.4905	48.852	41.8041	20.0048	43.922
AAAS	AAAS_8086_4_8	TCAACCCTACAGTGTTTGAG	-0.830271	-0.685083	-0.279998	-2.18306	-0.730854	29.4905	48.852	41.8041	20.0048	43.922
AAAS	AAAS_sgAAAS_9	TTGCTCCCGGTGATGGATGA	-0.785072	-0.850831	-0.52427	-0.209288	-0.03141	29.4905	48.852	41.8041	20.0048	43.922
AAAS	AAAS_8086_3_1	TCCCTTATCAGGCGTGATGT	-1.42547	-0.671848	-0.575098	-0.243587	-0.2548	29.4905	48.852	41.8041	20.0048	43.922
AAAS	AAAS_8086_2_6	TCCATCACCGGGAGCAAGTG	-1.70031	-1.9467	-1.73575	-1.59976	-1.34751	29.4905	48.852	41.8041	20.0048	43.922
AAAS	AAAS_8086_1_11	CCGGCAAGATGTGCTCTCTG	-1.64326	-0.915677	-0.730968	-1.25417	-1.22112	29.4905	48.852	41.8041	20.0048	43.922
AAMDC	AAMDC_28971_4_6	TCTTCCATTCCACCTGCTGA	0.0953883	-0.335003	0.652948	-0.359539	0.561038	11.1556	17.2917	9.78828	22.5325	33.8428
AAMDC	AAMDC_28971_4_1	CCAGGTGCCTTCATCAACTG	0.235433	0.790383	1.19913	-0.541197	1.83142	11.1556	17.2917	9.78828	22.5325	33.8428
AAMDC	AAMDC_28971_4_4	GCGGGTCCTCCAGACAGAGC	-0.368917	0.285624	-0.222813	0.11131	-1.25898	11.1556	17.2917	9.78828	22.5325	33.8428
AAMDC	AAMDC_28971_4_10	GGCTCCATCAGCAGGTGGAA	1.00763	0.861898	0.740457	1.01311	0.61844	11.1556	17.2917	9.78828	22.5325	33.8428
AAMDC	AAMDC_28971_3_2	GGTGTACAGACTCTTGTGAT	-1.08693	-1.27996	0.0055632	0.0172432	-0.0768017	11.1556	17.2917	9.78828	22.5325	33.8428
AAMDC	AAMDC_28971_4_3	GAAACATGGCATTGATGTGC	0.00899776	-1.19102	-0.210412	-0.358277	-0.351345	11.1556	17.2917	9.78828	22.5325	33.8428
AAMDC	AAMDC_28971_3_1	TGTGCAGCCTGCAGATGTGA	0.235175	0.974753	0.927313	0.617861	0.400922	11.1556	17.2917	9.78828	22.5325	33.8428
AAMDC	AAMDC_ENSG00000087884_1_13903	ACAGCATAATCTATTCATGA	-0.292923	0.190874	0.804541	0.145048	-0.234606	11.1556	17.2917	9.78828	22.5325	33.8428
AAMDC	AAMDC_28971_3_3	GATTGGCCGAGGGATGAGTG	-0.2515	0.230505	-0.371539	0.0824262	0.0547417	11.1556	17.2917	9.78828	22.5325	33.8428
AAMDC	AAMDC_ENSG00000087884_0_13903	AACAGCATAATCTATTCATG	-0.251974	-0.469729	-1.03765	0.627806	0.982724	11.1556	17.2917	9.78828	22.5325	33.8428
AAMDC	AAMDC_28971_4_7	CCTGCTGATGGAGCCTTAAG	0.380498	1.51647	0.600031	0.857815	0.914633	11.1556	17.2917	9.78828	22.5325	33.8428
AAMDC	AAMDC_28971_2_2	ACTTGGGATTGGAGAGAAAC	-0.454818	0.440198	-0.258238	0.185942	-0.751232	11.1556	17.2917	9.78828	22.5325	33.8428
AAMDC	AAMDC_28971_4_8	AGGTACTCCACAGTTGATGA	-0.612895	0.0765431	0.0634414	0.609005	0.307373	11.1556	17.2917	9.78828	22.5325	33.8428
AAMDC	AAMDC_28971_4_2	GTGGAGTACCTCAAGAAACA	0.446249	0.923965	0.158007	1.45242	0.398785	11.1556	17.2917	9.78828	22.5325	33.8428
AAMDC	AAMDC_28971_4_5	TATAATGCCTTGGTTGCCCA	-0.419033	-0.411475	0.240384	0.515014	0.432113	11.1556	17.2917	9.78828	22.5325	33.8428
AAMDC	AAMDC_28971_3_4	ACATCTGCAGGCTGCACACC	0.15461	0.531448	0.532349	0.797373	1.42554	11.1556	17.2917	9.78828	22.5325	33.8428
AAMDC	AAMDC_28971_3_5	ACAACTTCCTTCACATCTGC	-0.506735	0.0363073	0.237089	0.44006	0.56784	11.1556	17.2917	9.78828	22.5325	33.8428
AAMDC	AAMDC_28971_3_7	CATACCAACACCTACCTTCA	-0.855418	0.0920474	0.746776	0.606173	0.653217	11.1556	17.2917	9.78828	22.5325	33.8428
AAMDC	AAMDC_28971_4_9	TCACTGCCTGCTCTGTCTGG	-1.32296	-0.833836	-0.248599	-1.02697	-0.746945	11.1556	17.2917	9.78828	22.5325	33.8428
AAMDC	AAMDC_28971_3_6	TCAAGGCCTCACTCATCCCT	-0.946318	-0.45686	0.341367	-0.318559	-0.634848	11.1556	17.2917	9.78828	22.5325	33.8428
AAMP	AAMP_14_5_6	CGTCAGCTGTGCCCGCCAAC	-1.44664	-2.09255	-0.268206	-3.35993	-1.0717	81.919	84.6752	92.9062	82.3153	69.5083
AAMP	AAMP_14_8_6	GGAGAGTGAGTCCAACTCGG	-2.41567	-2.28489	-2.05914	-5.03331	-1.70092	81.919	84.6752	92.9062	82.3153	69.5083
AAMP	AAMP_14_7_2	GGCAGTCCACAGAGCCAGTT	-2.2713	-1.16201	-2.46867	-1.81973	-1.61505	81.919	84.6752	92.9062	82.3153	69.5083
AAMP	AAMP_14_3_1	ATCGCTGAGCCGCCATACGA	-2.27614	-3.0284	-2.82996	-3.78499	-2.68592	81.919	84.6752	92.9062	82.3153	69.5083
AAMP	AAMP_14_1_10	GGAGTCCGAATCGGAAAGCG	-1.19248	-1.9235	-0.417687	-3.38964	-2.11085	81.919	84.6752	92.9062	82.3153	69.5083
AAMP	AAMP_14_1_5	ACTCCATGCGGCGCAAGCGG	-1.34425	-0.755056	-1.05336	-1.56336	-1.6628	81.919	84.6752	92.9062	82.3153	69.5083
AAMP	AAMP_14_5_14	GTGGATGGAGTGGCATCCTC	-1.55962	-2.60551	-4.05396	-3.33486	-3.06906	81.919	84.6752	92.9062	82.3153	69.5083
AAMP	AAMP_14_3_3	CGTATGGCGGCTCAGCGATG	-3.14931	-4.38276	-4.20606	-4.30358	-3.69351	81.919	84.6752	92.9062	82.3153	69.5083
AAMP	AAMP_14_3_5	AATACCTTGGCAGTGACCGG	-2.03581	-4.45177	-2.75199	-2.56369	-2.51349	81.919	84.6752	92.9062	82.3153	69.5083
AAMP	AAMP_14_1_8	AGAACTTGATCCCGGTCCGC	-0.713428	-1.02333	-1.55679	-3.3668	-1.99937	81.919	84.6752	92.9062	82.3153	69.5083
AAMP	AAMP_14_8_5	TCCAACTCGGTGGAGTCCTT	-1.5411	-0.670045	-1.32336	-1.85303	-1.53953	81.919	84.6752	92.9062	82.3153	69.5083
AAMP	AAMP_14_2_2	AAAGGTGACCTCGCTATCGT	-1.88735	-1.76985	-1.56551	-3.73616	-1.20448	81.919	84.6752	92.9062	82.3153	69.5083
AAMP	AAMP_14_9_8	CCTGGCAGCTGTTGGCTACC	-1.94914	-1.93746	-1.5245	-2.18615	-1.85667	81.919	84.6752	92.9062	82.3153	69.5083
AAMP	AAMP_14_5_5	ATTCGGGACTTTCCACATCC	-2.20514	-2.9336	-1.50274	-2.88664	-1.76977	81.919	84.6752	92.9062	82.3153	69.5083
AAMP	AAMP_14_1_4	TTTCCGATTCGGACTCCATG	-1.46426	-1.20414	-0.516031	-2.28365	-2.26452	81.919	84.6752	92.9062	82.3153	69.5083
AAMP	AAMP_14_4_5	TGGACACTAAGGAGGAGGTC	0.613142	-1.06514	-1.6874	-0.73742	-0.329287	81.919	84.6752	92.9062	82.3153	69.5083
AAMP	AAMP_14_5_1	ATCAGGGAGGACTCGGCCAC	1.33948	0.56721	0.448835	0.79874	-0.283947	81.919	84.6752	92.9062	82.3153	69.5083
AAMP	AAMP_14_4_1	CTCCAGGTCTCCCGCTTCAA	-1.77274	-2.68747	-2.22412	-2.83702	-2.20693	81.919	84.6752	92.9062	82.3153	69.5083
AAMP	AAMP_14_5_11	CTGACGGCAACACCTGGATG	-1.18545	-0.787329	-0.85204	-0.798401	0.159044	81.919	84.6752	92.9062	82.3153	69.5083
AAMP	AAMP_14_6_5	CTGTGGTAGGCTATGAAGAT	-0.348914	-1.8492	-1.96139	-1.85828	-1.84817	81.919	84.6752	92.9062	82.3153	69.5083
AATF	AATF_sgAATF_4	GGTCCGCCTCGCTTGGTCGC	-2.12503	-2.28154	-1.81057	-1.33299	-2.47921	53.1453	73.5183	44.8257	29.0327	41.1249
AATF	AATF_sgAATF_5	GCTTCAGGGTCCGCCTCGCT	-2.11965	-1.22678	-2.67633	-2.33183	-2.20602	53.1453	73.5183	44.8257	29.0327	41.1249
AATF	AATF_26574_6_9	AAGCGCTTTGCCATGAAGCT	-0.648038	-1.39871	-0.159121	-1.54638	-0.894622	53.1453	73.5183	44.8257	29.0327	41.1249
AATF	AATF_26574_5_3	GATATCTAGTGTCTGGGTAC	-2.31977	-2.77954	-2.62621	-4.35685	-2.9359	53.1453	73.5183	44.8257	29.0327	41.1249
AATF	AATF_sgAATF_9	ATCAAACCTGTCAATCACCC	-1.74607	-0.841754	-0.928887	-1.09912	-1.21452	53.1453	73.5183	44.8257	29.0327	41.1249
AATF	AATF_sgAATF_10	GTGATTGACAGGTTTGATGA	-0.20047	-0.0311158	-0.778671	-0.687308	0.176933	53.1453	73.5183	44.8257	29.0327	41.1249
AATF	AATF_26574_1_9	GGACCGGGAGCTGGTGACGA	0.562788	-0.753353	-1.03932	-1.19273	0.112734	53.1453	73.5183	44.8257	29.0327	41.1249
AATF	AATF_26574_6_6	GGAACCGCACACTTCAGAAA	-1.54813	-2.35841	-2.4187	-2.59899	-1.42552	53.1453	73.5183	44.8257	29.0327	41.1249
AATF	AATF_sgAATF_3	GTTGAACCCGCGACCAAGCG	-0.855217	-1.48698	-1.82822	-2.88639	-3.04078	53.1453	73.5183	44.8257	29.0327	41.1249
AATF	AATF_26574_3_10	GGATGACCTTGGGAGCAGTG	-2.28358	-2.67711	-2.51429	-1.60093	-2.62775	53.1453	73.5183	44.8257	29.0327	41.1249
AATF	AATF_sgAATF_2	CTGTTCCAGTTGCAGCGCCA	-0.269401	-0.0977365	-0.824366	0.180187	-0.300122	53.1453	73.5183	44.8257	29.0327	41.1249
AATF	AATF_26574_3_5	GAATATGATGAGGACGACCT	-0.465462	0.108195	-0.161029	-0.706843	0.0147259	53.1453	73.5183	44.8257	29.0327	41.1249
AATF	AATF_26574_5_1	GCATTGTTGAGGTCATTGGT	-2.40714	-3.52985	-2.75858	-3.06845	-3.61945	53.1453	73.5183	44.8257	29.0327	41.1249
AATF	AATF_26574_1_18	TGTTCCAGTTGCAGCGCCAG	-1.08995	-1.30318	-0.502711	-1.22923	-0.724374	53.1453	73.5183	44.8257	29.0327	41.1249
AATF	AATF_sgAATF_8	GTCAATCACCCTGGCAGCAG	-0.866209	-1.81442	-0.411837	-0.0212227	-0.257814	53.1453	73.5183	44.8257	29.0327	41.1249
AATF	AATF_26574_6_5	TTGCCGACTTTACAGTCTAC	-1.15106	-2.08549	-2.70577	-0.992333	-0.340102	53.1453	73.5183	44.8257	29.0327	41.1249
AATF	AATF_sgAATF_1	CGGGAGCTGGTGACGATGGC	0.609229	-0.465945	-0.971644	-1.15001	-0.209245	53.1453	73.5183	44.8257	29.0327	41.1249
AATF	AATF_sgAATF_6	AGTCCGGCCTCACCTTCCTC	-2.12576	-2.03367	-1.16013	-3.25975	-2.27851	53.1453	73.5183	44.8257	29.0327	41.1249
AATF	AATF_sgAATF_7	CCCGACAGCCACTGCTGCCA	-1.1344	-1.35705	-1.49255	0.180686	-1.22334	53.1453	73.5183	44.8257	29.0327	41.1249
ABL1	ABL1_sgABL1_6	GCGGCTTCACTCAGACCCTG	-0.174795	-0.661047	-1.27234	-1.02354	0.0275792	18.1415	34.7565	21.6525	37.3498	33.3841
ABL1	ABL1_sgABL1_4	GGCTCAAAGTCAGATGCTAC	0.188038	0.469083	-0.859968	0.461893	-0.259317	18.1415	34.7565	21.6525	37.3498	33.3841
ABL1	ABL1_25_5_11	GAGCGTGGTGATGAGCCCGT	0.452257	-0.167206	-1.03814	0.369149	0.623112	18.1415	34.7565	21.6525	37.3498	33.3841
ABL1	ABL1_sgABL1_10	GCTTAGAGTGTTATCTCCAC	-1.45465	-0.337596	-0.702774	-1.69502	-0.956887	18.1415	34.7565	21.6525	37.3498	33.3841
ABL1	ABL1_sgABL1_7	GTCTGAGTGAAGCCGCTCGT	1.06516	0.45971	-0.0426462	1.05078	1.25126	18.1415	34.7565	21.6525	37.3498	33.3841
ABL1	ABL1_25_2_3	CTCGTCCTCCAGCTGTTATC	-0.628914	-1.21241	-1.62512	-0.872378	-1.21649	18.1415	34.7565	21.6525	37.3498	33.3841
ABL1	ABL1_25_4_1	CATCACGCCAGTCAACAGTC	1.11029	1.0786	0.40705	0.761658	1.32198	18.1415	34.7565	21.6525	37.3498	33.3841
ABL1	ABL1_25_3_7	TTCCTTGGAGTTCCAACGAG	1.05942	0.282166	0.201457	-0.32783	0.460885	18.1415	34.7565	21.6525	37.3498	33.3841
ABL1	ABL1_sgABL1_8	AGCCGCTCGTTGGAACTCCA	0.541687	0.271733	0.582922	0.957916	-0.219213	18.1415	34.7565	21.6525	37.3498	33.3841
ABL1	ABL1_25_4_11	TGTTTCTCCAGACTGTTGAC	-0.467151	-0.829273	-0.598518	-0.919181	-0.271218	18.1415	34.7565	21.6525	37.3498	33.3841
ABL1	ABL1_25_4_7	AAGGGAGGGTGTACCATTAC	-0.500291	-1.27244	-0.775807	-0.289902	-1.06482	18.1415	34.7565	21.6525	37.3498	33.3841
ABL1	ABL1_25_5_1	CGAGAGCCGCTTCAACACCC	0.643686	0.744345	0.514092	0.4481	1.61525	18.1415	34.7565	21.6525	37.3498	33.3841
ABL1	ABL1_sgABL1_3	AGATGCTACTGGCCGCTGAA	1.15415	1.74346	0.649161	1.67299	0.522113	18.1415	34.7565	21.6525	37.3498	33.3841
ABL1	ABL1_25_4_13	TCAGCGGCATTGCGGGACAC	-0.867475	-0.138272	-1.67974	0.187899	-0.0321832	18.1415	34.7565	21.6525	37.3498	33.3841
ABL1	ABL1_25_5_10	ATGATGAACCAACTCGGCCA	0.0702595	0.586969	0.490256	0.558534	0.376961	18.1415	34.7565	21.6525	37.3498	33.3841
ABL1	ABL1_sgABL1_2	ACTGGCCGCTGAAGGGCTTC	1.44076	0.670518	1.20602	0.735794	0.968992	18.1415	34.7565	21.6525	37.3498	33.3841
ABL1	ABL1_25_4_15	AGCGAGATGGACCTCTGGCC	1.62623	1.47406	1.57247	1.27737	1.76076	18.1415	34.7565	21.6525	37.3498	33.3841
ABL1	ABL1_sgABL1_1	CTCTTCCAGAAGCCCTTCAG	1.23572	1.19469	0.593087	0.754108	0.810609	18.1415	34.7565	21.6525	37.3498	33.3841
ABL1	ABL1_sgABL1_9	TTTCACTGGGTCCAGCGAGA	-0.176572	-0.676987	-0.888311	0.219886	0.437387	18.1415	34.7565	21.6525	37.3498	33.3841
ABL1	ABL1_sgABL1_5	AGCATCTGACTTTGAGCCTC	0.679919	0.315112	1.21605	0.145942	1.50091	18.1415	34.7565	21.6525	37.3498	33.3841
ABR	ABR_29_3_3	GTGGGCGACTCATCGATGTA	-0.231992	1.19854	1.04071	1.13031	0.925298	10.9999	35.5876	36.7744	14.1496	33.6841
ABR	ABR_29_3_4	GGCATGGTCTCTGAGCCCTC	-0.862332	-0.569228	0.338644	-0.581219	-0.154451	10.9999	35.5876	36.7744	14.1496	33.6841
ABR	ABR_29_2_2	GTGTCGATCCAGGACAGGCG	-0.675784	0.233715	-0.150161	-0.710233	-0.371197	10.9999	35.5876	36.7744	14.1496	33.6841
ABR	ABR_29_2_1	GCTGTAGAGGGTGTCGATCC	0.382922	0.0572896	-0.256646	-0.412886	0.718271	10.9999	35.5876	36.7744	14.1496	33.6841
ABR	ABR_29_6_4	GGTTGTCATAGAACTCCTTG	-0.198785	-0.338526	-0.48263	0.0466183	-0.305653	10.9999	35.5876	36.7744	14.1496	33.6841
ABR	ABR_29_7_1	CCTCTGAGATCTTCTGGAAC	1.4614	0.956779	1.28175	0.958296	0.998935	10.9999	35.5876	36.7744	14.1496	33.6841
ABR	ABR_29_9_19	AGGACTCTAGCCTCGTGCCC	0.16199	0.394268	0.201078	0.689501	0.408839	10.9999	35.5876	36.7744	14.1496	33.6841
ABR	ABR_29_9_12	TGAGTGGCCGGGCTGCTGGT	0.15373	-0.0647151	-0.125629	0.783176	-0.192948	10.9999	35.5876	36.7744	14.1496	33.6841
ABR	ABR_29_3_5	CCCGACTCCACCTGAGGGAC	0.882875	0.524173	0.375299	0.276513	0.445191	10.9999	35.5876	36.7744	14.1496	33.6841
ABR	ABR_29_3_7	CGGACGAGTACGACGGAGAG	1.15829	1.00735	0.971941	1.64862	1.10223	10.9999	35.5876	36.7744	14.1496	33.6841
ABR	ABR_29_9_4	CCAGCATCGGGCAGCCGCTC	0.731197	0.439449	0.792552	0.198194	1.09565	10.9999	35.5876	36.7744	14.1496	33.6841
ABR	ABR_29_3_8	CTCAGACTTCAGCTACGGGA	1.0332	0.582321	0.335578	0.384128	0.184596	10.9999	35.5876	36.7744	14.1496	33.6841
ABR	ABR_29_9_5	TCCGGAGTGCTCTTCCAGCA	1.75239	0.805902	0.902764	1.05841	1.09073	10.9999	35.5876	36.7744	14.1496	33.6841
ABR	ABR_29_9_9	AAGAGGAGCACGTTTGTAGC	0.923129	1.40916	0.572151	0.990205	1.47355	10.9999	35.5876	36.7744	14.1496	33.6841
ABR	ABR_29_7_3	ACGCTTTGTACACACCGAGC	-0.410389	-1.02824	-0.196906	0.194231	-0.511839	10.9999	35.5876	36.7744	14.1496	33.6841
ABR	ABR_29_2_8	ATGGAGCCGCTCAGCCACCG	1.4583	0.724158	1.09184	1.20303	0.84121	10.9999	35.5876	36.7744	14.1496	33.6841
ABR	ABR_29_4_2	TTCCCAGCTCGCACTCCTCC	-0.280402	-0.393804	-0.014178	0.0433875	-0.510104	10.9999	35.5876	36.7744	14.1496	33.6841
ABR	ABR_29_4_5	CTCCTGGAGGAGTGCGAGCT	0.964488	0.97237	0.638914	0.762172	0.313846	10.9999	35.5876	36.7744	14.1496	33.6841
ABR	ABR_29_4_10	TGTCTGCCCTCCGCGGGCTC	0.101144	-0.275493	-0.18682	-0.213539	-0.162438	10.9999	35.5876	36.7744	14.1496	33.6841
ABR	ABR_29_9_3	TGCCGCACGGACTCCAGCAT	0.347613	1.01242	0.847206	1.21551	0.431182	10.9999	35.5876	36.7744	14.1496	33.6841
ACACA	ACACA_31_5_2	CGTGTGCGGTCGGGCGATTC	-1.93802	-2.99193	-2.62373	-1.32093	-2.23013	24.294	16.6822	41.1027	10.7585	17.7641
ACACA	ACACA_31_19_3	GGGTGCTCTACCTGCAGCCG	-0.213736	0.474584	-0.752472	-0.620621	0.551995	24.294	16.6822	41.1027	10.7585	17.7641
ACACA	ACACA_31_19_7	GGATGGCAGCTTCTACTTTC	-2.05891	-0.586276	-1.26976	-0.639897	-0.566354	24.294	16.6822	41.1027	10.7585	17.7641
ACACA	ACACA_31_18_1	GCTGGAGTAGCAATAGTAGC	-1.15702	-0.208946	-0.0961698	-0.36379	0.956247	24.294	16.6822	41.1027	10.7585	17.7641
ACACA	ACACA_31_19_6	GGAATTGAATCCTCGGCTGC	-0.18067	-0.784627	-0.800716	-0.457868	0.621381	24.294	16.6822	41.1027	10.7585	17.7641
ACACA	ACACA_31_18_3	GTGATTGCTCTGTACAACGC	-3.12275	-3.37536	-2.24742	-2.0211	-1.34651	24.294	16.6822	41.1027	10.7585	17.7641
ACACA	ACACA_31_19_8	GAATACCTGTACAGCCAGGA	-1.26056	-1.16015	-1.01037	-1.29827	-1.59605	24.294	16.6822	41.1027	10.7585	17.7641
ACACA	ACACA_31_4_4	GGAAGGCCACTTCATAAGTC	0.0220631	-0.763509	-0.406249	0.355863	0.0296558	24.294	16.6822	41.1027	10.7585	17.7641
ACACA	ACACA_31_12_2	GCATGCGGTCTATCCGTAGG	-1.93074	-2.40652	-1.71597	-2.03298	-1.9291	24.294	16.6822	41.1027	10.7585	17.7641
ACACA	ACACA_31_5_8	TCAGCCATCGCCCGAGCCGC	-0.672289	-0.261439	-0.173137	-0.570067	0.251009	24.294	16.6822	41.1027	10.7585	17.7641
ACACA	ACACA_31_6_10	TCTCCGAAGAAGGATCCTCT	-0.301471	0.607515	-0.165532	-0.520939	0.0788907	24.294	16.6822	41.1027	10.7585	17.7641
ACACA	ACACA_31_8_4	CCAGTAGGTCCAACTTCACC	-0.476164	-0.774235	-0.00730421	-0.931184	-0.515577	24.294	16.6822	41.1027	10.7585	17.7641
ACACA	ACACA_31_14_3	TATTCCCTTGCAGGCAGTGT	-2.36159	-2.4987	-2.16132	-2.43731	-2.31616	24.294	16.6822	41.1027	10.7585	17.7641
ACACA	ACACA_31_8_12	ATCTCCCTTGGCCCAACCTC	-0.892186	-0.751966	-0.167343	-0.308037	-0.918999	24.294	16.6822	41.1027	10.7585	17.7641
ACACA	ACACA_31_21_1	CTCCTGAACTGTTCCTGAGC	0.270637	0.308711	-1.14427	0.476811	-0.0484268	24.294	16.6822	41.1027	10.7585	17.7641
ACACA	ACACA_31_22_2	TTGAAGGAGCTGTCTATTCG	-1.81978	-1.75911	-1.80856	-1.80483	-0.484545	24.294	16.6822	41.1027	10.7585	17.7641
ACACA	ACACA_31_18_4	CAGATCTTAGCGGACCAATA	-1.38329	-0.48132	-1.19512	-1.48678	-0.598165	24.294	16.6822	41.1027	10.7585	17.7641
ACACA	ACACA_31_14_1	CAAGAGAAGTTCCGGTAGTT	-0.103347	-0.207179	-0.426133	-0.241882	-0.0912649	24.294	16.6822	41.1027	10.7585	17.7641
ACACA	ACACA_31_20_1	TGATCCGAGCAGCAATAACA	-1.07726	-1.31879	-2.14194	-2.20233	-0.547608	24.294	16.6822	41.1027	10.7585	17.7641
ACACB	ACACB_32_3_4	GGCCATCCGGTTTGTTGTGA	0.994658	0.868675	0.54274	0.348933	0.326685	1.48544	0.329795	0.518088	0.822743	1.13665
ACACB	ACACB_32_1_28	CTGCGTCACTGGAAGAAAGG	1.00183	1.0746	0.475871	0.499317	0.28915	1.48544	0.329795	0.518088	0.822743	1.13665
ACACB	ACACB_32_1_34	AGCAACAGAGTCCTCGTCGG	0.41428	0.37592	0.432992	0.88166	0.298095	1.48544	0.329795	0.518088	0.822743	1.13665
ACACB	ACACB_32_3_9	ACCGGATGGCCCGCTCGTTG	0.689028	0.119478	0.295949	0.323007	0.0203804	1.48544	0.329795	0.518088	0.822743	1.13665
ACACB	ACACB_32_1_16	AGTCTACCCGGAAGGGCAGC	0.23522	0.247133	-0.199751	0.199568	0.986913	1.48544	0.329795	0.518088	0.822743	1.13665
ACACB	ACACB_32_1_14	TCCGACGAGGACTCTGTTGC	-0.773293	-0.394708	-0.580489	0.300736	-0.244564	1.48544	0.329795	0.518088	0.822743	1.13665
ACACB	ACACB_32_1_26	TAGGGAGTTTCTCCGCCGAC	-0.582806	-0.621085	-0.132314	-0.800899	-0.727806	1.48544	0.329795	0.518088	0.822743	1.13665
ACACB	ACACB_32_3_2	AGTGCATGCGCTCCATCCGC	-1.07558	-0.467348	-0.264399	-0.559683	-1.07067	1.48544	0.329795	0.518088	0.822743	1.13665
ACACB	ACACB_32_1_1	AGCAAACCTCATCCCGAGCC	0.274489	0.627968	1.60767	1.0769	1.13654	1.48544	0.329795	0.518088	0.822743	1.13665
ACACB	ACACB_32_1_20	AGGGCTCCTGGCTCGGGATG	-0.197945	-0.560088	-0.902503	-0.887323	-1.00039	1.48544	0.329795	0.518088	0.822743	1.13665
ACACB	ACACB_32_2_4	CCTGCACAGAGACTTTACCG	0.422291	-0.0760757	-0.263034	-0.30682	0.00130655	1.48544	0.329795	0.518088	0.822743	1.13665
ACACB	ACACB_32_1_30	ACCTTGTGTCCCAGTCCCGT	0.201935	0.041596	-1.13701	-0.225574	0.383755	1.48544	0.329795	0.518088	0.822743	1.13665
ACACB	ACACB_32_3_5	CACGGCGGCAATCCCGTTGT	0.751905	0.130468	0.25235	-0.331499	0.717447	1.48544	0.329795	0.518088	0.822743	1.13665
ACACB	ACACB_32_2_1	GAGCATGTCGGGACTCCACC	1.29351	0.332853	0.219625	0.368387	0.925937	1.48544	0.329795	0.518088	0.822743	1.13665
ACACB	ACACB_32_1_18	CTGGAGGCTTATCTGACCAC	0.790884	0.693259	0.370464	0.135616	-0.129495	1.48544	0.329795	0.518088	0.822743	1.13665
ACACB	ACACB_32_1_25	TCCGCCGACCGGCATCTTTG	-0.423393	-0.117863	0.24827	0.375273	-0.550896	1.48544	0.329795	0.518088	0.822743	1.13665
ACACB	ACACB_32_1_13	TGATGACTACTCCTCCGACG	1.41913	1.14398	0.685359	1.02868	0.126227	1.48544	0.329795	0.518088	0.822743	1.13665
ACACB	ACACB_32_3_7	CTCATAGGCCCACCTGCGGA	0.976129	0.38418	0.220996	0.519777	0.440688	1.48544	0.329795	0.518088	0.822743	1.13665
ACOX3	ACOX3_8310_2_5	GCTGGCGCTGTTCACGGAAG	-1.38957	-0.227653	-0.312296	0.445784	-0.875324	4.83777	5.13858	1.96755	3.36022	5.13928
ACOX3	ACOX3_8310_4_1	GGATCAGCAGTTTACAGTTC	-0.0424233	0.33067	0.518986	1.0609	0.563871	4.83777	5.13858	1.96755	3.36022	5.13928
ACOX3	ACOX3_8310_2_7	GAGCAAGAGCGTCCTTCAGC	0.24514	0.644042	0.637282	1.32482	-0.0027788	4.83777	5.13858	1.96755	3.36022	5.13928
ACOX3	ACOX3_8310_5_2	GTAGTGGGCAGTTGTGCGAA	-0.548252	-0.405313	0.146106	0.75964	0.618052	4.83777	5.13858	1.96755	3.36022	5.13928
ACOX3	ACOX3_8310_3_2	GAGAAGAGTCATACATGCCC	0.0681375	0.465827	0.500293	-0.45543	-0.624879	4.83777	5.13858	1.96755	3.36022	5.13928
ACOX3	ACOX3_8310_6_1	CGATAAAGGGATGCAGCCCA	0.508393	-0.154229	-0.57014	0.0878947	-0.0779665	4.83777	5.13858	1.96755	3.36022	5.13928
ACOX3	ACOX3_8310_2_2	AGCTGAAGGACGCTCTTGCT	0.534043	-0.0518506	0.0804762	0.331047	0.607962	4.83777	5.13858	1.96755	3.36022	5.13928
ACOX3	ACOX3_8310_5_5	GCTCTGACCGAATTAAGCCA	-0.137424	0.423455	0.148513	-0.195661	0.380832	4.83777	5.13858	1.96755	3.36022	5.13928
ACOX3	ACOX3_8310_6_2	AGCAAACACCACCGCGTGAG	0.918045	0.676722	0.889591	-0.131506	0.389896	4.83777	5.13858	1.96755	3.36022	5.13928
ACOX3	ACOX3_8310_3_7	TCCAAGGACAGATCGGCTCC	-0.34678	-0.348277	0.0668824	-0.0633094	-0.125283	4.83777	5.13858	1.96755	3.36022	5.13928
ACOX3	ACOX3_8310_3_9	CCCGCCTTGATTCAGTGCCT	0.484913	0.383287	0.543123	0.440637	0.240367	4.83777	5.13858	1.96755	3.36022	5.13928
ACOX3	ACOX3_8310_2_9	TGCAGGCTCTTATCACGCGA	-0.178434	-0.32133	-0.198787	-0.081578	-0.097475	4.83777	5.13858	1.96755	3.36022	5.13928
ACOX3	ACOX3_8310_3_5	CGAAGATCCGCTTGCATCGA	2.03229	1.6397	1.496	1.30578	1.4093	4.83777	5.13858	1.96755	3.36022	5.13928
ACOX3	ACOX3_8310_7_1	ATGTCGCCAACCATCACTCC	0.292994	0.53574	0.74876	0.641548	0.243806	4.83777	5.13858	1.96755	3.36022	5.13928
ACOX3	ACOX3_8310_6_5	CAAGACAGCCACTCACGCGG	0.18711	0.0340911	0.069024	-0.902993	-0.0465092	4.83777	5.13858	1.96755	3.36022	5.13928
ACOX3	ACOX3_8310_2_3	CTCTTGCTCGGTAGGCATCG	0.168184	-0.449977	0.238719	0.0442238	-0.386418	4.83777	5.13858	1.96755	3.36022	5.13928
ACOX3	ACOX3_8310_5_4	AAGCCACGGCAGTAATACCA	0.61123	0.790619	0.944463	-0.190649	1.16054	4.83777	5.13858	1.96755	3.36022	5.13928
ACOX3	ACOX3_8310_3_11	TGAACTTCCTTCGATGCAAG	1.35944	0.831981	1.27325	0.628223	1.42935	4.83777	5.13858	1.96755	3.36022	5.13928
ACOX3	ACOX3_8310_3_6	CAGCTCGCGATACTTCTCCA	-0.0312184	0.305115	0.209814	-1.01264	-0.176183	4.83777	5.13858	1.96755	3.36022	5.13928
ACTA2	ACTA2_59_5_1	GGGTGCCTCCGTGAGCAGGG	-0.767796	0.480008	-1.47822	-0.955961	-0.37794	3.2908	18.9985	2.70226	1.00353	3.9425
ACTA2	ACTA2_59_6_3	CGCCTGGATAGCCACATACA	-0.383439	0.45028	0.0918256	-0.0683239	-0.377284	3.2908	18.9985	2.70226	1.00353	3.9425
ACTA2	ACTA2_59_6_1	CCTACCAGTTGTGCGTCCAG	-1.4181	0.0821328	-0.327768	-0.190123	-0.423834	3.2908	18.9985	2.70226	1.00353	3.9425
ACTA2	ACTA2_59_3_6	GGCTCTGGGCTCTGTAAGGC	-0.712507	0.0478074	-0.592753	-0.208698	-0.12685	3.2908	18.9985	2.70226	1.00353	3.9425
ACTA2	ACTA2_59_3_1	ATGTCTGGGACGTCCCACAA	0.591517	0.27903	0.16203	0.404334	0.0468723	3.2908	18.9985	2.70226	1.00353	3.9425
ACTA2	ACTA2_59_3_9	TCCAGCTATGTGTGAAGAAG	-0.100445	0.0593968	-0.654038	-1.06613	0.397803	3.2908	18.9985	2.70226	1.00353	3.9425
ACTA2	ACTA2_59_3_5	CTGTAAGGCCGGCTTTGCTG	-0.673028	0.305302	-0.291512	-1.15131	-1.05452	3.2908	18.9985	2.70226	1.00353	3.9425
ACTA2	ACTA2_59_5_3	GCATCCCACCCTGCTCACGG	0.119327	1.34647	0.777485	0.429459	0.276354	3.2908	18.9985	2.70226	1.00353	3.9425
ACTA2	ACTA2_59_3_4	CATAGCTGGAGCTGCTTCAC	-0.26493	0.146658	0.0337547	-0.529802	-0.06348	3.2908	18.9985	2.70226	1.00353	3.9425
ACTA2	ACTA2_59_3_3	TCCTCTTCTTCACACATAGC	-1.1503	0.29932	-0.0879783	-0.720748	-0.54419	3.2908	18.9985	2.70226	1.00353	3.9425
ACTA2	ACTA2_59_7_8	ATCGTGCTGGACTCTGGAGA	-0.795761	0.216878	0.271611	-0.102116	0.629889	3.2908	18.9985	2.70226	1.00353	3.9425
ACTA2	ACTA2_59_6_6	CAATGTCCCAGCCATGTATG	0.432378	0.810119	-0.342136	0.237507	0.155111	3.2908	18.9985	2.70226	1.00353	3.9425
ACTA2	ACTA2_59_6_5	CATGTATGTGGCTATCCAGG	0.0565823	-0.0807281	0.0786829	0.217611	0.00763152	3.2908	18.9985	2.70226	1.00353	3.9425
ACTA2	ACTA2_59_4_1	CATGTTCTATCGGGTACTTC	-1.06729	-1.49195	-0.319235	0.155483	-0.518571	3.2908	18.9985	2.70226	1.00353	3.9425
ACTA2	ACTA2_59_7_9	TTGTCTCCCAGGCATCGTGC	-0.738241	-1.23903	-0.806594	-0.536675	-0.144678	3.2908	18.9985	2.70226	1.00353	3.9425
ACTA2	ACTA2_59_6_2	CATAGAGAGACAGCACCGCC	-0.940753	-1.15172	-0.218076	-1.1881	-1.02456	3.2908	18.9985	2.70226	1.00353	3.9425
ACTA2	ACTA2_59_4_4	CTGAAGTACCCGATAGAACA	-0.170038	0.29708	0.314222	0.0266932	0.54979	3.2908	18.9985	2.70226	1.00353	3.9425
ACTA2	ACTA2_59_3_8	AGAAGAGGACAGCACTGCCT	1.73525	1.72126	1.48166	0.563246	1.26884	3.2908	18.9985	2.70226	1.00353	3.9425
ACTL6A	ACTL6A_86_2_2	GAGAGCTGGTTATGCTGGTG	-0.994978	-0.178372	-0.221825	0.602617	-0.693512	96.8328	108.229	101.52	72.0683	46.8606
ACTL6A	ACTL6A_sgACTL6A_8	GCGTGTTCCGAGGGAGAATA	-0.604619	-0.0248251	-0.723366	-0.532216	-0.0157436	96.8328	108.229	101.52	72.0683	46.8606
ACTL6A	ACTL6A_86_1_9	GCGCCGGCAGCAGCCATGAG	-2.77841	-4.00402	-3.80198	-5.00975	-4.24998	96.8328	108.229	101.52	72.0683	46.8606
ACTL6A	ACTL6A_86_1_11	GGGAGGTGAGTGAGTGCGGC	-1.0801	-1.5025	-1.50251	-1.19674	-0.629479	96.8328	108.229	101.52	72.0683	46.8606
ACTL6A	ACTL6A_sgACTL6A_7	CTAATGCTCTGCGTGTTCCG	-2.3535	-3.058	-1.92422	-1.78456	-1.92345	96.8328	108.229	101.52	72.0683	46.8606
ACTL6A	ACTL6A_86_3_1	TCCTACAGCTATTGGTATGG	-2.79587	-2.98792	-3.11115	-3.0103	-2.98193	96.8328	108.229	101.52	72.0683	46.8606
ACTL6A	ACTL6A_sgACTL6A_9	ATGGCCTCCATATTCTCCCT	-1.33337	-1.82138	-1.11096	-0.666598	-1.13594	96.8328	108.229	101.52	72.0683	46.8606
ACTL6A	ACTL6A_86_3_5	ACCACCATACCAATAGCTGT	-0.200331	-0.834743	-1.24937	-0.849061	-1.72195	96.8328	108.229	101.52	72.0683	46.8606
ACTL6A	ACTL6A_86_1_18	CCGCCGCTCATGGCTGCTGC	-0.377666	-0.972365	-0.406078	0.639929	-0.72259	96.8328	108.229	101.52	72.0683	46.8606
ACTL6A	ACTL6A_sgACTL6A_2	AGATGACGGAAGCACATTAA	-0.00948249	-1.70826	0.11977	-1.26855	-1.99137	96.8328	108.229	101.52	72.0683	46.8606
ACTL6A	ACTL6A_86_1_19	CCCGTACACGCCGCCGCTCA	-3.7698	-4.53547	-3.74574	-5.52309	-4.63439	96.8328	108.229	101.52	72.0683	46.8606
ACTL6A	ACTL6A_86_2_1	GGATCCTATACTGTGAGAGC	-2.46624	-3.74154	-2.58643	-2.69122	-2.17765	96.8328	108.229	101.52	72.0683	46.8606
ACTL6A	ACTL6A_sgACTL6A_3	AGCACATTAATGGAAATAGA	-0.68533	-2.79192	-1.09754	-1.60589	-0.88016	96.8328	108.229	101.52	72.0683	46.8606
ACTL6A	ACTL6A_sgACTL6A_4	ATGGAAATAGATGGCGATAA	0.0899779	-0.85533	-1.00532	-0.508235	-0.371154	96.8328	108.229	101.52	72.0683	46.8606
ACTL6A	ACTL6A_86_4_2	CATGAGAACAGGATGGAGAC	-0.720364	-2.72439	-1.3626	-1.22917	-1.2548	96.8328	108.229	101.52	72.0683	46.8606
ACTL6A	ACTL6A_86_1_10	GCCATGAGCGGCGGCGTGTA	-1.89076	-3.08863	-1.97301	-2.6278	-2.43438	96.8328	108.229	101.52	72.0683	46.8606
ACTL6A	ACTL6A_sgACTL6A_5	GATGGCGATAAAGGCAAACA	-0.767764	-1.222	0.0606852	-0.36314	-0.860205	96.8328	108.229	101.52	72.0683	46.8606
ACTL6A	ACTL6A_sgACTL6A_6	TTAGTATCTATGTAGTAGGT	-1.47255	-2.06814	-2.14474	-1.03979	-1.42764	96.8328	108.229	101.52	72.0683	46.8606
ACTL6A	ACTL6A_sgACTL6A_1	ATGGTGGTAGAAAGAGATGA	-1.50526	-2.98883	-1.58768	-2.14478	-2.23663	96.8328	108.229	101.52	72.0683	46.8606
ACTL6B	ACTL6B_sgACTL6B_4	GGGCTGCTGGCCGCGGAGGA	0.712098	0.452336	0.942821	0.484842	0.692305	0	0	0.0311775	0	0.00815149
ACTL6B	ACTL6B_sgACTL6B_7	GCCCTGCACGTGCCTCGGGA	-1.02528	-0.806575	-1.58295	-1.33657	-0.469787	0	0	0.0311775	0	0.00815149
ACTL6B	ACTL6B_51412_2_3	GCTCCTTCTCAGTCCGCGCT	-0.108548	-0.0813364	-0.468704	0.268529	-0.796233	0	0	0.0311775	0	0.00815149
ACTL6B	ACTL6B_51412_4_3	AGACTTGACGTGTTTGCTGT	1.19581	0.731749	0.435386	-0.231623	0.800443	0	0	0.0311775	0	0.00815149
ACTL6B	ACTL6B_sgACTL6B_1	GCGCAGCGGGCACTATGAGC	-1.35902	-1.23147	-1.35775	-2.06708	-1.0559	0	0	0.0311775	0	0.00815149
ACTL6B	ACTL6B_51412_5_1	AGCCGTCTTGCATAAGAAGA	0.626783	0.301988	0.1997	-0.348939	0.717257	0	0	0.0311775	0	0.00815149
ACTL6B	ACTL6B_51412_1_4	GCAGCGGGCACTATGAGCGG	-0.912908	-0.838459	-0.438221	-1.70719	-0.827112	0	0	0.0311775	0	0.00815149
ACTL6B	ACTL6B_51412_4_4	GTTTGCTGTAGGTGTGATCC	-1.9292	-0.92944	-0.706137	-0.0209239	-0.349107	0	0	0.0311775	0	0.00815149
ACTL6B	ACTL6B_51412_3_4	CGTGCCTCGGGATGGAGCGG	-0.474221	-1.27566	-1.33545	-0.843263	-1.1445	0	0	0.0311775	0	0.00815149
ACTL6B	ACTL6B_sgACTL6B_2	GTACCCAGCGCGGACTGAGA	0.285546	0.20501	0.107927	-0.373344	0.423461	0	0	0.0311775	0	0.00815149
ACTL6B	ACTL6B_sgACTL6B_5	GCAGGGCATTGGTGTCGATG	-0.580224	-1.01997	-1.53524	-1.25651	-0.575814	0	0	0.0311775	0	0.00815149
ACTL6B	ACTL6B_51412_5_3	GTGGAACACACGGGCCAAGC	0.762148	1.11104	1.13364	-0.21096	1.86728	0	0	0.0311775	0	0.00815149
ACTL6B	ACTL6B_sgACTL6B_3	CAGTCCGCGCTGGGTACGCT	0.37226	0.0732603	0.354822	0.370328	0.435151	0	0	0.0311775	0	0.00815149
ACTL6B	ACTL6B_51412_3_5	CAATGCCCTGCACGTGCCTC	-1.01023	0.109378	0.314533	0.41638	0.945541	0	0	0.0311775	0	0.00815149
ACTL6B	ACTL6B_51412_2_2	AGTCCGCGCTGGGTACGCTG	-0.658174	-0.194346	-0.493663	-0.630719	-0.248505	0	0	0.0311775	0	0.00815149
ACTL6B	ACTL6B_sgACTL6B_9	ATGACCTCCGCTCCATCCCG	-0.414475	0.446121	0.0656524	0.204652	0.398556	0	0	0.0311775	0	0.00815149
ACTL6B	ACTL6B_sgACTL6B_10	CCTTACTCATGCCATTCTTG	-0.21643	-0.620164	-0.518375	-0.207205	0.223346	0	0	0.0311775	0	0.00815149
ACTL6B	ACTL6B_sgACTL6B_6	CCAATGCCCTGCACGTGCCT	0.801178	0.694467	0.365845	0.532097	0.743383	0	0	0.0311775	0	0.00815149
ACTR5	ACTR5_sgACTR5_2	CACTGGGTCCGGTGCGGCAC	-0.929723	-1.87195	-2.79579	-1.21072	-0.0656079	8.79041	5.33837	10.2977	11.4407	7.48687
ACTR5	ACTR5_sgACTR5_10	GTACCGCTGGTGCTGGACAA	-1.05901	-0.141703	-1.28674	-1.49544	-1.25006	8.79041	5.33837	10.2977	11.4407	7.48687
ACTR5	ACTR5_79913_1_20	CGCACACCGCGCGGAACTGC	-1.12561	-1.39617	-1.46527	-1.70575	-0.896661	8.79041	5.33837	10.2977	11.4407	7.48687
ACTR5	ACTR5_sgACTR5_1	CGGCACGGGCGTCGCGGAAC	-2.09108	-0.876105	-0.649761	-0.89799	-1.28672	8.79041	5.33837	10.2977	11.4407	7.48687
ACTR5	ACTR5_79913_1_1	GCTGGACGCGCGCTCCAAGA	0.450705	-0.115361	0.52959	-0.728801	-0.15272	8.79041	5.33837	10.2977	11.4407	7.48687
ACTR5	ACTR5_sgACTR5_6	GAGGCCGGCCCGGTGGCACA	-0.431238	0.381936	-0.911209	-1.24755	-0.563559	8.79041	5.33837	10.2977	11.4407	7.48687
ACTR5	ACTR5_79913_1_5	GGGTCGTTCCAAGTCCGCGC	-0.977203	-1.87665	-2.71982	-2.00325	-2.11418	8.79041	5.33837	10.2977	11.4407	7.48687
ACTR5	ACTR5_79913_1_2	TGCCGCACCGGACCCAGTGC	-0.541273	-0.015623	-0.0852225	0.198294	-0.504171	8.79041	5.33837	10.2977	11.4407	7.48687
ACTR5	ACTR5_sgACTR5_9	ACTGCCGGTACCGCTGGTGC	-0.447925	0.059004	-0.412505	-0.99385	-0.111834	8.79041	5.33837	10.2977	11.4407	7.48687
ACTR5	ACTR5_sgACTR5_7	GCAGTGGCCCGTGTGCCACC	-0.476232	-0.0443064	-0.286884	-0.674273	-0.0464986	8.79041	5.33837	10.2977	11.4407	7.48687
ACTR5	ACTR5_79913_1_21	GCATCCAGCGCAGTGGCTCC	0.232265	0.133682	-0.700541	-0.505304	-1.39485	8.79041	5.33837	10.2977	11.4407	7.48687
ACTR5	ACTR5_79913_1_25	TACTCCGCCCTTCACCTGTG	-2.08798	-0.122329	-1.13641	-1.16189	-1.24108	8.79041	5.33837	10.2977	11.4407	7.48687
ACTR5	ACTR5_79913_1_19	CGGAACTGCAGGCGCGGCTC	-0.699213	-0.395404	-0.59376	-0.912913	-0.777358	8.79041	5.33837	10.2977	11.4407	7.48687
ACTR5	ACTR5_79913_1_22	ACCGGCACGTTGCGGTCGAA	-0.323252	0.415994	-0.248013	-0.619905	-1.66781	8.79041	5.33837	10.2977	11.4407	7.48687
ACTR5	ACTR5_79913_1_17	ACGCCCAGCCAGCGCGGACT	1.45985	1.31019	0.851567	0.107126	0.464857	8.79041	5.33837	10.2977	11.4407	7.48687
ACTR5	ACTR5_79913_2_2	TGAGTGCTACGGGATTCCCA	-0.883799	-0.568116	-1.06364	-1.38437	-0.399742	8.79041	5.33837	10.2977	11.4407	7.48687
ACTR5	ACTR5_sgACTR5_8	CGGGCCACTGCCGGTACCGC	0.213821	0.42906	0.0183689	-0.244901	0.292466	8.79041	5.33837	10.2977	11.4407	7.48687
ACTR5	ACTR5_sgACTR5_4	CCGGACCCAGTGCTGGAGGC	0.984056	0.735015	0.425018	0.13949	0.205122	8.79041	5.33837	10.2977	11.4407	7.48687
ACTR5	ACTR5_sgACTR5_5	CCGGGCCGGCCTCCAGCACT	-0.114295	-0.118027	-0.588618	0.349297	-0.274579	8.79041	5.33837	10.2977	11.4407	7.48687
ACTR5	ACTR5_sgACTR5_3	CTCCAGCACTGGGTCCGGTG	-0.219046	-0.182586	-1.82363	-0.313125	-1.04294	8.79041	5.33837	10.2977	11.4407	7.48687
ACTR6	ACTR6_64431_1_40	GGCGTATATATCTTGTCCCT	-2.06088	0.0777278	-1.85898	0.174933	-0.578901	36.202	18.6156	13.7028	45.5437	12.0199
ACTR6	ACTR6_64431_1_39	AGCTCCATTATCCAGCACTA	-2.87453	-2.59589	-1.96971	-2.3253	-2.50884	36.202	18.6156	13.7028	45.5437	12.0199
ACTR6	ACTR6_64431_1_42	GTCTGCAGTTCATTGATGTC	1.33252	-0.290602	0.734027	-0.491381	0.975681	36.202	18.6156	13.7028	45.5437	12.0199
ACTR6	ACTR6_64431_1_43	GCTAAGTCAGGGCCGCGCGG	-1.06455	-0.628781	-0.299333	-0.964064	-2.4724	36.202	18.6156	13.7028	45.5437	12.0199
ACTR6	ACTR6_ENSG00000075089_10_0	GAGTTCTAAAGGAGGCCCCT	0.921136	-0.463265	0.661255	-0.383385	-0.0904383	36.202	18.6156	13.7028	45.5437	12.0199
ACTR6	ACTR6_64431_1_44	GAATCCCTCTGGCTAAGTCA	-0.735678	0.0306561	-0.611678	-0.942184	-0.295326	36.202	18.6156	13.7028	45.5437	12.0199
ACTR6	ACTR6_64431_1_22	CGCGGCCCTGACTTAGCCAG	-1.5515	-0.734377	-0.749532	-0.612854	-0.859883	36.202	18.6156	13.7028	45.5437	12.0199
ACTR6	ACTR6_64431_3_1	GGGATGTTCAGAGACAAGTT	-0.33212	-1.28874	-1.8248	-2.19419	-1.37727	36.202	18.6156	13.7028	45.5437	12.0199
ACTR6	ACTR6_64431_9_1	AGGGAAGAGATGGTGTTGAG	-1.24699	-1.23044	-1.46938	-2.13392	-1.61929	36.202	18.6156	13.7028	45.5437	12.0199
ACTR6	ACTR6_64431_9_2	CGGAACAGCAAATCTCTCAT	-0.505815	-1.37643	-1.12672	-0.959712	-1.25908	36.202	18.6156	13.7028	45.5437	12.0199
ACTR6	ACTR6_64431_11_1	TCAGCCCTATTACTTATGCC	-0.278011	-0.0751644	0.0595694	0.0355665	-0.176132	36.202	18.6156	13.7028	45.5437	12.0199
ACTR6	ACTR6_64431_1_41	ACGTAGCACATGAAACCACT	0.138514	-0.0405594	-0.225906	-0.0933247	-0.211196	36.202	18.6156	13.7028	45.5437	12.0199
ACTR6	ACTR6_64431_11_2	CTTATGCTGTTTCCAAGGGT	-0.226885	-0.229991	-0.694256	-0.197943	-0.269058	36.202	18.6156	13.7028	45.5437	12.0199
ACTR6	ACTR6_64431_1_21	CATGTGCTACGTTTCATCTC	0.000636097	-0.816091	-0.502153	0.0537708	0.21245	36.202	18.6156	13.7028	45.5437	12.0199
ACTR6	ACTR6_64431_1_23	ACTTAGCCAGAGGGATTCCC	-0.0942624	0.255248	-0.0896952	-0.323291	-1.15365	36.202	18.6156	13.7028	45.5437	12.0199
ACTR6	ACTR6_ENSG00000075089_11_0	AGTTCTAAAGGAGGCCCCTG	-0.698142	-0.280642	-0.612282	-0.484835	-0.971916	36.202	18.6156	13.7028	45.5437	12.0199
ACTR6	ACTR6_64431_1_20	TGAGATGACGACCTTAGTGC	-1.71859	-1.69912	-2.88229	-3.28036	-2.09305	36.202	18.6156	13.7028	45.5437	12.0199
ACTR6	ACTR6_64431_1_45	CTCCAACCAGGGAATCCCTC	-0.14625	-0.120854	0.099497	0.669585	-0.219812	36.202	18.6156	13.7028	45.5437	12.0199
ACTR8	ACTR8_93973_3_1	AGGAATGCGTCTTGTACCAT	-0.503226	-0.562919	-1.26605	-1.59764	-1.45477	10.2313	7.80492	10.2405	7.22232	5.80303
ACTR8	ACTR8_93973_1_9	CATCGTGCCCGCGCTGGTGC	-0.367501	0.0311484	-0.972345	0.267761	-0.0145401	10.2313	7.80492	10.2405	7.22232	5.80303
ACTR8	ACTR8_sgACTR8_5	GGGTGATACGGAGAACGGAA	-1.64747	-1.66981	-2.01166	-1.85153	-1.87889	10.2313	7.80492	10.2405	7.22232	5.80303
ACTR8	ACTR8_93973_1_3	GGCACCAGCGCGGGCACGAT	-1.72908	-1.37741	-3.63672	-0.851271	-1.69408	10.2313	7.80492	10.2405	7.22232	5.80303
ACTR8	ACTR8_sgACTR8_8	GAAGGGCGGCGAGAAGGAGA	-1.10243	-2.4117	-2.23286	-1.81771	-0.161446	10.2313	7.80492	10.2405	7.22232	5.80303
ACTR8	ACTR8_93973_5_4	GGCCTTGTATGTTAATCCAC	-1.41575	-1.26617	-3.74461	-1.07007	-3.03125	10.2313	7.80492	10.2405	7.22232	5.80303
ACTR8	ACTR8_sgACTR8_10	AGGAGCAGCGCGGCGTGAAG	0.118353	-0.291632	-0.410162	0.265318	-0.457848	10.2313	7.80492	10.2405	7.22232	5.80303
ACTR8	ACTR8_sgACTR8_4	GAGAAGGGTGATACGGAGAA	-0.96837	-0.701251	-3.09517	-1.50662	-2.99861	10.2313	7.80492	10.2405	7.22232	5.80303
ACTR8	ACTR8_sgACTR8_7	AAAGGAGAAGGGCGGCGAGA	-0.398665	-0.248543	0.0583596	0.515596	0.755432	10.2313	7.80492	10.2405	7.22232	5.80303
ACTR8	ACTR8_93973_1_4	CCGTATCACCCTTCTCAGCC	-0.376661	-0.886815	-2.00407	-0.791631	-0.516663	10.2313	7.80492	10.2405	7.22232	5.80303
ACTR8	ACTR8_sgACTR8_1	GTCTCCGGCCATAATGACCC	-1.59799	-1.59676	-3.30782	-2.03496	-3.01107	10.2313	7.80492	10.2405	7.22232	5.80303
ACTR8	ACTR8_sgACTR8_9	GAGAAGGAGAAGGAGCAGCG	-0.958421	-0.771737	-2.42404	-1.35768	-1.75317	10.2313	7.80492	10.2405	7.22232	5.80303
ACTR8	ACTR8_93973_4_1	AGGTCGCATCTGCTTATTGT	-1.10211	-1.42786	-1.77638	-1.61804	-2.26221	10.2313	7.80492	10.2405	7.22232	5.80303
ACTR8	ACTR8_93973_1_2	CAGCGACTCCGGCACCAGCG	0.448762	-0.484691	-1.18873	-0.073176	-0.657238	10.2313	7.80492	10.2405	7.22232	5.80303
ACTR8	ACTR8_sgACTR8_6	GAGAACGGAAAGGAGAAGGG	-2.485	-5.22239	-4.19415	-4.34198	-3.34438	10.2313	7.80492	10.2405	7.22232	5.80303
ACTR8	ACTR8_93973_1_1	CGCACCTCTTGCAGCGACTC	-1.28374	-0.473095	-1.83774	-0.356572	-0.656142	10.2313	7.80492	10.2405	7.22232	5.80303
ACTR8	ACTR8_sgACTR8_3	CCAGGCTGAGAAGGGTGATA	-1.26513	-1.77093	-2.52517	-0.898242	-1.55219	10.2313	7.80492	10.2405	7.22232	5.80303
ACTR8	ACTR8_93973_2_4	ATGACGTGAGGAATGCTGGC	0.070759	1.13864	-0.320065	0.087714	0.1891	10.2313	7.80492	10.2405	7.22232	5.80303
ACTR8	ACTR8_sgACTR8_2	ATAATGACCCAGGCTGAGAA	0.439207	-0.192189	-2.36273	-0.404812	-1.00435	10.2313	7.80492	10.2405	7.22232	5.80303
ACTRT3	ACTRT3_84517_1_13	GGCGGGCTAGAACTCTGCGT	-2.12304	-0.260825	-2.26084	0.443465	-1.6623	3.02077	0.0161066	2.35742	3.83299	0.758437
ACTRT3	ACTRT3_84517_1_12	GCGACCAAGCTCAGGACTGG	0.751264	1.16105	0.042325	0.133665	0.730777	3.02077	0.0161066	2.35742	3.83299	0.758437
ACTRT3	ACTRT3_84517_2_54	AGCGTGGTCTCATTACTTCA	-0.588427	-1.00143	0.191135	0.173118	-0.783839	3.02077	0.0161066	2.35742	3.83299	0.758437
ACTRT3	ACTRT3_84517_2_27	GTAATGAGACCACGCTCCAC	-0.00326534	0.476956	0.0944544	0.678704	0.874371	3.02077	0.0161066	2.35742	3.83299	0.758437
ACTRT3	ACTRT3_sgACTRT3_5	GGCTCGGGAATGATCAAGGC	0.218907	0.264355	-0.422966	-1.29303	-0.635229	3.02077	0.0161066	2.35742	3.83299	0.758437
ACTRT3	ACTRT3_sgACTRT3_6	GGGAATGATCAAGGCGGGCG	-3.44528	-2.57416	-3.16196	-2.44558	-2.46886	3.02077	0.0161066	2.35742	3.83299	0.758437
ACTRT3	ACTRT3_84517_1_18	GAACCACTGCCAGCTACCGG	-0.384279	0.307944	0.360106	-0.761567	-0.808891	3.02077	0.0161066	2.35742	3.83299	0.758437
ACTRT3	ACTRT3_84517_1_2	CGCAGAGTTCTAGCCCGCCC	-0.613308	0.0480996	0.179257	0.141077	-0.252831	3.02077	0.0161066	2.35742	3.83299	0.758437
ACTRT3	ACTRT3_sgACTRT3_7	TGATCAAGGCGGGCGTGGCT	0.699372	1.16905	0.968199	0.946961	1.40564	3.02077	0.0161066	2.35742	3.83299	0.758437
ACTRT3	ACTRT3_sgACTRT3_2	TCACCACCGGTAGCTGGCAG	-0.26759	0.707126	-0.180862	0.117684	0.0259251	3.02077	0.0161066	2.35742	3.83299	0.758437
ACTRT3	ACTRT3_84517_1_1	AGCTCCTCCAGTCCTGAGCT	-0.100382	0.472313	0.0214029	0.22036	0.62434	3.02077	0.0161066	2.35742	3.83299	0.758437
ACTRT3	ACTRT3_84517_2_55	TACAGTTACCCAGTGGAGCG	1.01043	-0.115298	0.731533	0.758228	0.493585	3.02077	0.0161066	2.35742	3.83299	0.758437
ACTRT3	ACTRT3_sgACTRT3_8	AATGTTCGGGTAGATAAACT	-1.34678	-0.0184438	-0.427731	0.459698	-0.48697	3.02077	0.0161066	2.35742	3.83299	0.758437
ACTRT3	ACTRT3_sgACTRT3_1	CATGAACCACTGCCAGCTAC	0.201469	-0.233617	0.189317	0.154116	0.240671	3.02077	0.0161066	2.35742	3.83299	0.758437
ACTRT3	ACTRT3_sgACTRT3_3	CTACCGGTGGTGATCGACAA	-0.546626	-0.405457	-0.939511	-0.00756196	-0.899163	3.02077	0.0161066	2.35742	3.83299	0.758437
ACTRT3	ACTRT3_sgACTRT3_9	TTTATCTACCCGAACATTAT	-0.700728	-0.685034	-0.764449	-0.320461	-0.595638	3.02077	0.0161066	2.35742	3.83299	0.758437
ACVR1	ACVR1_sgACVR1_6	GTGTGTGAAGGTCTCTCCTG	-0.532447	0.194122	0.573584	0.442325	-0.750995	5.07754	13.5111	5.60553	5.05823	13.6872
ACVR1	ACVR1_90_5_13	TCCTCACTGAGCATCAACGA	0.186192	1.39158	-0.627478	-0.143362	-0.267649	5.07754	13.5111	5.60553	5.05823	13.6872
ACVR1	ACVR1_90_5_3	TCTTTCCCTGCTCATAAACC	0.131163	1.59565	0.0831365	1.25268	-0.523898	5.07754	13.5111	5.60553	5.05823	13.6872
ACVR1	ACVR1_90_5_12	GGCTTCCACGTCTACCAGAA	1.557	1.27924	0.561422	0.900519	-0.027639	5.07754	13.5111	5.60553	5.05823	13.6872
ACVR1	ACVR1_sgACVR1_5	CTCTACATGTGTGTGTGTGA	0.0655507	0.620147	1.20502	0.488655	0.842037	5.07754	13.5111	5.60553	5.05823	13.6872
ACVR1	ACVR1_sgACVR1_9	GGTAATGAGGACCACTGTGA	-0.0628774	-0.737627	0.0357832	0.238279	0.532378	5.07754	13.5111	5.60553	5.05823	13.6872
ACVR1	ACVR1_sgACVR1_4	ACACACACACATGTAGAGTT	1.15355	1.16452	0.884888	0.350316	0.367918	5.07754	13.5111	5.60553	5.05823	13.6872
ACVR1	ACVR1_sgACVR1_8	ACAGTGGTCCTCATTACCGC	0.513427	-0.0864819	-0.472055	-0.123173	-0.360832	5.07754	13.5111	5.60553	5.05823	13.6872
ACVR1	ACVR1_sgACVR1_3	AGTCACTTACCTTCCATACT	-0.148676	0.749112	1.01225	1.04028	0.190762	5.07754	13.5111	5.60553	5.05823	13.6872
ACVR1	ACVR1_sgACVR1_10	AGCACTGCTGGCCTTCACAG	0.290946	1.10625	0.140911	-0.302322	0.434219	5.07754	13.5111	5.60553	5.05823	13.6872
ACVR1	ACVR1_90_5_10	TGCTTCCAGGTTTATGAGCA	0.0797717	0.550199	0.501882	1.13483	0.152557	5.07754	13.5111	5.60553	5.05823	13.6872
ACVR1	ACVR1_90_5_5	GCCATCGTTGATGCTCAGTG	0.542677	0.558379	0.773514	0.610311	0.508644	5.07754	13.5111	5.60553	5.05823	13.6872
ACVR1	ACVR1_90_5_8	CTGGTGTAACAGGAACATCA	-0.470641	0.564302	0.0384176	0.748988	-0.0100217	5.07754	13.5111	5.60553	5.05823	13.6872
ACVR1	ACVR1_sgACVR1_1	TACAGTTGTACAATGGTAGA	-0.0480827	0.200834	-0.482236	-0.857837	0.102442	5.07754	13.5111	5.60553	5.05823	13.6872
ACVR1	ACVR1_90_5_11	CTACCAGAAAGGCTGCTTCC	0.586569	0.771364	0.853704	0.072989	-0.614573	5.07754	13.5111	5.60553	5.05823	13.6872
ACVR1	ACVR1_sgACVR1_2	AGAGCAATCATGATAAGCAC	-0.19181	0.285823	-0.435879	-0.175804	-0.144201	5.07754	13.5111	5.60553	5.05823	13.6872
ACVR1	ACVR1_sgACVR1_7	AGGTCTCTCCTGCGGTAATG	0.0788165	0.862007	-0.0428027	-0.307915	0.386769	5.07754	13.5111	5.60553	5.05823	13.6872
ACVR1	ACVR1_90_5_4	AAACCTGGAAGCAGCCTTTC	1.03917	1.54672	0.373428	0.0475953	0.69457	5.07754	13.5111	5.60553	5.05823	13.6872
ACVR1B	ACVR1B_91_4_12	ATCCTGGAGCGTCTTGTCTT	1.0589	0.442869	0.401109	0.037997	1.51076	5.88986	6.18515	16.338	8.70564	7.0507
ACVR1B	ACVR1B_91_2_1	AGCACCTCGTGTGTGTTCTT	-0.00387558	-0.831343	0.405374	1.16529	-0.0482898	5.88986	6.18515	16.338	8.70564	7.0507
ACVR1B	ACVR1B_sgACVR1B_4	GCCCTTCTACTGCCTGAGCT	1.01887	-0.145074	0.129623	0.944421	1.10163	5.88986	6.18515	16.338	8.70564	7.0507
ACVR1B	ACVR1B_sgACVR1B_6	AGCAGCAGTGGGTGTTGCGC	-1.09435	-1.92545	-0.921555	-0.781582	-0.141944	5.88986	6.18515	16.338	8.70564	7.0507
ACVR1B	ACVR1B_91_5_6	TGGTTCGGGCCACTGTGCGC	-1.81521	-0.969308	-1.10506	-1.26367	-0.695148	5.88986	6.18515	16.338	8.70564	7.0507
ACVR1B	ACVR1B_sgACVR1B_2	AGTAGAAGGGCTTCCCGGCA	-0.484347	-0.139362	0.0731327	0.808838	-0.47264	5.88986	6.18515	16.338	8.70564	7.0507
ACVR1B	ACVR1B_sgACVR1B_7	GTAGTCAGTGTAGCAGCAGT	-0.103283	-1.22462	0.284794	-0.0903382	0.0358712	5.88986	6.18515	16.338	8.70564	7.0507
ACVR1B	ACVR1B_sgACVR1B_8	GCTACACTGACTACTGCAAC	0.566533	-0.124659	0.821032	0.824526	0.662674	5.88986	6.18515	16.338	8.70564	7.0507
ACVR1B	ACVR1B_91_4_2	GAGCTGGTAGGCATCATCGC	-1.66273	-1.49716	-0.564814	-0.668302	-0.301471	5.88986	6.18515	16.338	8.70564	7.0507
ACVR1B	ACVR1B_sgACVR1B_9	ACTGCAACAGGATCGACTTG	0.377629	1.06121	0.828829	0.957556	0.549696	5.88986	6.18515	16.338	8.70564	7.0507
ACVR1B	ACVR1B_91_4_1	AGCCTGAGCACCCGTCCATG	0.465933	-0.261164	0.105158	0.663935	0.546247	5.88986	6.18515	16.338	8.70564	7.0507
ACVR1B	ACVR1B_91_3_2	AACTACACGTGTGAGACAGA	-0.276014	-0.0504326	-0.0723119	0.915176	0.194278	5.88986	6.18515	16.338	8.70564	7.0507
ACVR1B	ACVR1B_sgACVR1B_10	ATCGACTTGAGGGTGCCCAG	0.0222166	0.76644	0.319916	-0.159122	0.621207	5.88986	6.18515	16.338	8.70564	7.0507
ACVR1B	ACVR1B_91_1_2	GTTACTATGGCGGAGTCGGC	-0.488133	-0.970999	-0.258786	0.834439	0.477698	5.88986	6.18515	16.338	8.70564	7.0507
ACVR1B	ACVR1B_91_4_8	GAACAGGAGGAACACCGGGC	0.485498	0.385171	0.433758	0.780768	-0.0573642	5.88986	6.18515	16.338	8.70564	7.0507
ACVR1B	ACVR1B_sgACVR1B_5	TGCGCAGGTCCTCCGAGCTC	-0.500748	-0.69283	-0.183197	-0.679022	-0.101591	5.88986	6.18515	16.338	8.70564	7.0507
ACVR1B	ACVR1B_91_4_4	CTCCAAAGACAAGACGCTCC	0.875918	-0.0345837	0.36485	0.601115	0.412689	5.88986	6.18515	16.338	8.70564	7.0507
ACVR1B	ACVR1B_sgACVR1B_3	CAGGCAGTAGAAGGGCTTCC	-0.801301	-0.18427	-0.0712358	-0.33978	-0.431035	5.88986	6.18515	16.338	8.70564	7.0507
ACVR2A	ACVR2A_sgACVR2A_8	TTATCTTTGTCACCATAACA	1.27749	0.588118	0.293405	0.925369	0.506713	2.99645	2.00129	2.30525	1.80882	1.54941
ACVR2A	ACVR2A_92_4_5	GTGGCACCAAGGAATAGAGC	-0.379427	-0.824904	-0.183507	-0.0211081	0.820355	2.99645	2.00129	2.30525	1.80882	1.54941
ACVR2A	ACVR2A_92_4_2	GGTGTACAGGCATCACAAGA	1.30042	0.43264	-0.0733165	0.0298223	-0.00245748	2.99645	2.00129	2.30525	1.80882	1.54941
ACVR2A	ACVR2A_92_4_4	AGCAGGATGTTGTAATAGGG	-0.228874	-0.3274	0.115495	-0.214104	0.613994	2.99645	2.00129	2.30525	1.80882	1.54941
ACVR2A	ACVR2A_92_3_1	CGCTGTGTGACTTCCATCTC	0.874004	-0.174063	0.29703	0.105495	-0.0758214	2.99645	2.00129	2.30525	1.80882	1.54941
ACVR2A	ACVR2A_92_4_3	TAGGGTGGCTTAGGTGTAAC	0.446835	-0.0840233	-0.454681	-0.310234	-0.51288	2.99645	2.00129	2.30525	1.80882	1.54941
ACVR2A	ACVR2A_sgACVR2A_1	AATGGGAGCTGCTGCAAAGT	1.06497	0.784053	0.480786	0.173347	0.543617	2.99645	2.00129	2.30525	1.80882	1.54941
ACVR2A	ACVR2A_sgACVR2A_10	GCTACCTGGAAGAATATTTC	0.497095	1.00901	-0.0138514	0.645802	-0.00370136	2.99645	2.00129	2.30525	1.80882	1.54941
ACVR2A	ACVR2A_sgACVR2A_2	AGAACAGGAGATAAGAAAGA	-0.25693	0.284953	0.180902	-0.490008	-0.0759766	2.99645	2.00129	2.30525	1.80882	1.54941
ACVR2A	ACVR2A_92_4_6	TGGAACAAGTACAGGAGGGT	0.451246	0.261843	0.00130447	-0.523166	0.39034	2.99645	2.00129	2.30525	1.80882	1.54941
ACVR2A	ACVR2A_92_6_1	TACGAAGTCTACAGTTTGCC	0.928862	0.859129	1.46566	0.0142331	1.12993	2.99645	2.00129	2.30525	1.80882	1.54941
ACVR2A	ACVR2A_92_2_2	AGTGAAACAAGGTTGTTGGC	-0.744365	-0.718217	-0.43372	0.148505	-0.0943526	2.99645	2.00129	2.30525	1.80882	1.54941
ACVR2A	ACVR2A_sgACVR2A_5	TATCTTATAGGTGCTATACT	0.341281	-0.106362	0.435427	0.0501539	0.97114	2.99645	2.00129	2.30525	1.80882	1.54941
ACVR2A	ACVR2A_sgACVR2A_7	ACTGGTGTTGAACCGTGTTA	0.351417	-0.121479	-0.0372609	-0.0859327	0.195288	2.99645	2.00129	2.30525	1.80882	1.54941
ACVR2A	ACVR2A_92_5_1	CCTAGTAATGGAGAAGGTGG	0.201575	-0.412508	-0.0482353	0.476913	0.194068	2.99645	2.00129	2.30525	1.80882	1.54941
ACVR2A	ACVR2A_sgACVR2A_6	CGGTTCAACACCAGTTTGAT	-0.644485	-0.0984344	-0.539751	-0.188781	0.155271	2.99645	2.00129	2.30525	1.80882	1.54941
ACVR2A	ACVR2A_sgACVR2A_4	CCTGCACCTACCTGAAGAAC	0.571355	0.256281	0.198382	-0.0202517	0.738545	2.99645	2.00129	2.30525	1.80882	1.54941
ACVR2A	ACVR2A_sgACVR2A_9	ATGGTGACAAAGATAAACGG	-1.341	-0.959094	-0.952069	-0.203589	-0.870607	2.99645	2.00129	2.30525	1.80882	1.54941
ACVR2A	ACVR2A_sgACVR2A_3	TTTCTTATCTCCTGTTCTTC	-0.14776	-0.567769	-0.307664	0.0475303	-0.0746984	2.99645	2.00129	2.30525	1.80882	1.54941
ACVR2A	ACVR2A_92_4_1	CAACATCCTGCTCTATTCCT	0.427685	-0.0309327	0.6775	0.293168	0.645746	2.99645	2.00129	2.30525	1.80882	1.54941
ACVR2B	ACVR2B_sgACVR2B_6	GGTGCGCTCCAGCTCCCAGT	0.397694	-0.24173	0.0410584	-0.0944905	-0.197341	2.86546	1.29673	2.88431	2.92976	0.755168
ACVR2B	ACVR2B_93_1_1	GGCGGCGCCGCGGAACATGA	-0.705833	-1.12435	-0.499275	-2.13509	0.411232	2.86546	1.29673	2.88431	2.92976	0.755168
ACVR2B	ACVR2B_93_4_6	GCGATGCCGGTACATCCAAA	0.438222	-0.706812	-1.16129	0.0577813	1.21139	2.86546	1.29673	2.88431	2.92976	0.755168
ACVR2B	ACVR2B_sgACVR2B_3	GGTGGCCCTCGCCCTCCTCT	0.683148	-0.634401	-1.02072	-0.714484	-0.8387	2.86546	1.29673	2.88431	2.92976	0.755168
ACVR2B	ACVR2B_sgACVR2B_4	GCATCTACTACAACGCCAAC	1.36183	1.62304	0.518892	0.447207	1.34226	2.86546	1.29673	2.88431	2.92976	0.755168
ACVR2B	ACVR2B_93_2_12	GCCCTTCTTCACGAGCTCGA	1.58669	0.872115	0.798357	1.15026	0.734759	2.86546	1.29673	2.88431	2.92976	0.755168
ACVR2B	ACVR2B_93_3_2	GTGTACTTCTGCTGCTGTGA	1.19002	0.114814	0.864162	0.998132	0.25413	2.86546	1.29673	2.88431	2.92976	0.755168
ACVR2B	ACVR2B_93_5_3	GCGCTTTGGCTGTGTCTGGA	0.610212	0.146143	-0.0847406	-0.267497	1.53344	2.86546	1.29673	2.88431	2.92976	0.755168
ACVR2B	ACVR2B_sgACVR2B_10	AGCGGCCTGGAGCGCTGCGA	0.553317	0.943269	0.0284461	0.401474	0.358089	2.86546	1.29673	2.88431	2.92976	0.755168
ACVR2B	ACVR2B_sgACVR2B_2	AGGAGGGCGAGGGCCACCCA	-0.00343681	-0.0748293	-1.18236	-1.9693	-0.40572	2.86546	1.29673	2.88431	2.92976	0.755168
ACVR2B	ACVR2B_sgACVR2B_9	GCGCTCCAGGCCGCTCTGGT	0.643968	0.0412653	0.188107	0.334833	0.0944081	2.86546	1.29673	2.88431	2.92976	0.755168
ACVR2B	ACVR2B_93_4_7	ATGTCCACATGACCGTAGGG	-0.768411	0.18796	-0.368038	0.230147	-1.00947	2.86546	1.29673	2.88431	2.92976	0.755168
ACVR2B	ACVR2B_sgACVR2B_8	GCGCACCAACCAGAGCGGCC	0.867213	0.159624	0.451322	1.34387	0.0559491	2.86546	1.29673	2.88431	2.92976	0.755168
ACVR2B	ACVR2B_93_2_7	CACCATCGAGCTCGTGAAGA	2.51423	1.87938	1.46635	1.00236	1.50391	2.86546	1.29673	2.88431	2.92976	0.755168
ACVR2B	ACVR2B_sgACVR2B_7	CTGGAGCGCACCAACCAGAG	1.45121	0.739144	1.64398	1.2357	1.93644	2.86546	1.29673	2.88431	2.92976	0.755168
ACVR2B	ACVR2B_93_4_3	CAGCACCGTGAGCAGGGTGG	0.453076	-0.0560816	-1.92248	-0.343899	-0.305471	2.86546	1.29673	2.88431	2.92976	0.755168
ACVR2B	ACVR2B_sgACVR2B_1	CGCGGAACATGACGGCGCCC	1.0945	0.50566	0.199043	0.890268	-0.440643	2.86546	1.29673	2.88431	2.92976	0.755168
ACVR2B	ACVR2B_93_6_2	CGGGAGATCTTCAGCACACC	1.10665	1.5709	1.68533	1.68906	1.01258	2.86546	1.29673	2.88431	2.92976	0.755168
ACVR2B	ACVR2B_93_4_5	CCAGCAGGACGATGAGGGAA	1.34744	0.693512	0.49769	0.559894	0.636879	2.86546	1.29673	2.88431	2.92976	0.755168
ACVR2B	ACVR2B_sgACVR2B_5	CTACAACGCCAACTGGGAGC	0.469846	-0.30431	0.327348	0.044382	0.183665	2.86546	1.29673	2.88431	2.92976	0.755168
ACVRL1	ACVRL1_sgACVRL1_7	GACGGCTTCACAGGGTCTCC	-0.249505	-0.120434	0.439514	-0.601786	0.0830078	0	0.567932	0.0078795	0	0.00316462
ACVRL1	ACVRL1_94_3_3	GGCCTGGTGCACAGTAGTGC	-0.0994585	0.50598	0.412419	-0.121587	0.463969	0	0.567932	0.0078795	0	0.00316462
ACVRL1	ACVRL1_94_3_15	GGACGTACCCTCCAGCACCA	0.467083	-0.0785641	0.114602	0.746153	-0.486706	0	0.567932	0.0078795	0	0.00316462
ACVRL1	ACVRL1_94_3_5	GGGCTGCGGGAACTTGCACA	-1.5212	-1.49808	-0.532766	-0.640985	-0.754533	0	0.567932	0.0078795	0	0.00316462
ACVRL1	ACVRL1_sgACVRL1_5	GCTGATGGCCTTGGTGACCC	-1.07309	-0.62296	-0.200942	-0.966035	0.167256	0	0.567932	0.0078795	0	0.00316462
ACVRL1	ACVRL1_94_3_11	AGTGGTTGACGAACTCGGTG	-1.56208	-0.925662	0.0623706	-0.932347	-0.418594	0	0.567932	0.0078795	0	0.00316462
ACVRL1	ACVRL1_sgACVRL1_6	GTACTCACCCTGGGTCACCA	0.146584	0.379369	-0.554601	0.175079	0.586401	0	0.567932	0.0078795	0	0.00316462
ACVRL1	ACVRL1_94_4_14	GCCAGCTGGCCATCTGTTCC	-1.29418	-1.55297	-0.0755714	0.690646	-0.991124	0	0.567932	0.0078795	0	0.00316462
ACVRL1	ACVRL1_sgACVRL1_3	AGGCCTTCTGATGCTGCTGA	0.928222	0.617202	0.754395	0.411654	0.652043	0	0.567932	0.0078795	0	0.00316462
ACVRL1	ACVRL1_94_4_13	CGGCTGCTCCGAAGGAGGTT	-1.46785	-1.04232	0.582842	0.938912	0.188743	0	0.567932	0.0078795	0	0.00316462
ACVRL1	ACVRL1_94_4_3	GCCGGGAACAGATGGCCAGC	0.0253678	-0.0512595	-0.0577601	0.740154	0.27926	0	0.567932	0.0078795	0	0.00316462
ACVRL1	ACVRL1_sgACVRL1_2	AGCATCAGAAGGCCTTTCCT	-0.1628	0.17672	0.0818834	0.864676	0.0825313	0	0.567932	0.0078795	0	0.00316462
ACVRL1	ACVRL1_94_4_2	CAACCTCCTTCGGAGCAGCC	0.765488	0.58597	1.0305	0.692783	0.859551	0	0.567932	0.0078795	0	0.00316462
ACVRL1	ACVRL1_sgACVRL1_10	ATGTGGGCTCTCACACGTGC	-0.851288	-1.042	0.0702219	0.0769857	0.184506	0	0.567932	0.0078795	0	0.00316462
ACVRL1	ACVRL1_sgACVRL1_9	CACACGTGCAGGTCACCAGC	-0.538568	-0.0887896	-0.375337	0.400727	-0.8536	0	0.567932	0.0078795	0	0.00316462
ACVRL1	ACVRL1_sgACVRL1_1	CTCTGCAGGGACCATGACCT	0.336194	-0.400727	0.445117	0.357067	0.0387635	0	0.567932	0.0078795	0	0.00316462
ACVRL1	ACVRL1_sgACVRL1_8	AGACCCTGTGAAGCCGTCTC	0.672813	0.537769	0.878008	0.279108	0.435978	0	0.567932	0.0078795	0	0.00316462
ACVRL1	ACVRL1_94_3_13	ACACGTTGTGGTTGCAGAGG	-1.54652	-1.72733	-0.544393	-0.315709	-0.884682	0	0.567932	0.0078795	0	0.00316462
ACVRL1	ACVRL1_94_4_8	TGGGCCTGTGGCATGTCCGA	-2.17936	-1.94569	-0.386287	-0.594679	-1.49217	0	0.567932	0.0078795	0	0.00316462
ACVRL1	ACVRL1_sgACVRL1_4	TCTGATGCTGCTGATGGCCT	1.55981	1.386	1.51574	1.57664	0.641473	0	0.567932	0.0078795	0	0.00316462
ADAM23	ADAM23_8745_11_9	CATGCTGCTTAATGCGCTGC	0.494671	0.192128	1.41001	1.13376	-0.598803	0.265104	5.5692	0.957593	0.00898792	7.79061
ADAM23	ADAM23_8745_1_8	AGCCTTGCCGGCGCTTCCTG	1.26258	-0.297339	-0.351341	0.185524	-0.303486	0.265104	5.5692	0.957593	0.00898792	7.79061
ADAM23	ADAM23_8745_23_2	GTAGAAGATGGAACGCCATG	0.630248	1.49812	1.28111	0.308645	0.632281	0.265104	5.5692	0.957593	0.00898792	7.79061
ADAM23	ADAM23_8745_5_4	GTGGCTCTGTCAACCTGCAA	1.75734	1.19447	1.51447	0.707614	0.0375692	0.265104	5.5692	0.957593	0.00898792	7.79061
ADAM23	ADAM23_8745_3_4	TGGAGCCGAAGGCTTCAATC	-0.371679	-0.189748	-0.639641	-0.234161	-0.658918	0.265104	5.5692	0.957593	0.00898792	7.79061
ADAM23	ADAM23_8745_2_1	GATAAGGGCTTTCCGAGTCT	-0.875228	-0.0812446	0.51204	-0.794995	0.128806	0.265104	5.5692	0.957593	0.00898792	7.79061
ADAM23	ADAM23_8745_18_1	AGCCACGAGGGTATGAATGC	0.854234	0.156411	0.361566	-0.486438	-0.233717	0.265104	5.5692	0.957593	0.00898792	7.79061
ADAM23	ADAM23_8745_6_1	TATGATAGAGCCACTAGAGC	0.569647	-0.430093	-0.559575	-0.370421	-0.387851	0.265104	5.5692	0.957593	0.00898792	7.79061
ADAM23	ADAM23_8745_5_3	CAGAGGCGTCAAAGACTCCA	0.908651	1.35966	0.488278	0.270297	0.668805	0.265104	5.5692	0.957593	0.00898792	7.79061
ADAM23	ADAM23_8745_16_3	GTATCCATTTCCACATTCCG	0.238864	-0.645797	-0.218995	-0.553542	0.368419	0.265104	5.5692	0.957593	0.00898792	7.79061
ADAM23	ADAM23_8745_23_5	CACATCATAGACGGGCCACA	1.33239	1.49839	0.761639	0.359129	1.49345	0.265104	5.5692	0.957593	0.00898792	7.79061
ADAM23	ADAM23_8745_17_1	AGAAATGTTCCCTCTCCAAC	-0.0273944	-0.264134	-0.731892	0.627089	-0.0937051	0.265104	5.5692	0.957593	0.00898792	7.79061
ADAM23	ADAM23_8745_22_7	AGTCAATCACCCGGCCTTGA	-0.156846	0.675201	0.715192	0.211632	0.205107	0.265104	5.5692	0.957593	0.00898792	7.79061
ADAM23	ADAM23_8745_20_1	ACAACCAGTGTCAGTACATC	0.9594	0.654758	-0.0925249	0.166602	0.311675	0.265104	5.5692	0.957593	0.00898792	7.79061
ADAM23	ADAM23_8745_13_3	AATACTTGTGCCACTGCCAT	0.188867	0.518383	0.289113	1.16412	0.321647	0.265104	5.5692	0.957593	0.00898792	7.79061
ADAM23	ADAM23_8745_7_1	CTTAGAATACTGTCCTGCCA	0.992764	0.407743	0.253513	0.619859	0.37116	0.265104	5.5692	0.957593	0.00898792	7.79061
ADAM23	ADAM23_8745_18_2	TCCCGGCATTCATACCCTCG	-0.617921	-0.258869	-0.46974	-0.924772	-0.988477	0.265104	5.5692	0.957593	0.00898792	7.79061
ADAM23	ADAM23_8745_4_1	AACCGTACCTTAGAGTACTG	0.446668	-0.324094	-0.872133	0.0477801	-0.0212544	0.265104	5.5692	0.957593	0.00898792	7.79061
ADAM23	ADAM23_8745_22_1	CTTACTCGAGCTCCACGTAT	0.000951472	0.039635	0.00190212	0.228945	0.469526	0.265104	5.5692	0.957593	0.00898792	7.79061
ADAM23	ADAM23_8745_1_11	CTTCATGGCTCATAGCTCCC	-0.290001	-0.08579	0.561422	-0.651815	-0.0972008	0.265104	5.5692	0.957593	0.00898792	7.79061
ADAMTS10	ADAMTS10_81794_3_1	CGTGCGTGACCTCGAACATG	0.127876	-0.853581	-1.25417	-0.277295	-0.570452	0	0.0151946	0.0654895	0	0.0153029
ADAMTS10	ADAMTS10_81794_6_1	GGACATACTGCTCCACATCC	0.443191	-0.261705	-0.34464	0.412091	0.547604	0	0.0151946	0.0654895	0	0.0153029
ADAMTS10	ADAMTS10_81794_6_14	GGTCAGCCGAGAGCGCTACG	0.844012	0.091945	0.537692	0.166355	0.375325	0	0.0151946	0.0654895	0	0.0153029
ADAMTS10	ADAMTS10_81794_5_6	CTTCCTCGTCTGCCACGATC	-0.409824	0.0410973	-0.151601	0.00838554	0.188447	0	0.0151946	0.0654895	0	0.0153029
ADAMTS10	ADAMTS10_81794_5_8	TCTCGGAGCCCGGAGGAAAG	-1.49225	-0.202378	-0.367933	-0.398861	0.098857	0	0.0151946	0.0654895	0	0.0153029
ADAMTS10	ADAMTS10_81794_4_20	ACTGGCAGGGCACGTCTCCG	0.599566	0.506663	-0.47225	-0.832759	-0.471619	0	0.0151946	0.0654895	0	0.0153029
ADAMTS10	ADAMTS10_81794_7_3	GCGAGTTACGAGGATGTTAA	-0.633519	0.635243	0.896876	0.699623	0.854932	0	0.0151946	0.0654895	0	0.0153029
ADAMTS10	ADAMTS10_81794_6_10	CTATCACGGGCGCCGGGATG	-2.18844	-1.38058	-1.6724	-1.75284	-1.95247	0	0.0151946	0.0654895	0	0.0153029
ADAMTS10	ADAMTS10_81794_4_8	AGCTGCGGGTCAGGTTCAGC	0.963883	-0.265553	0.505418	0.686436	0.257219	0	0.0151946	0.0654895	0	0.0153029
ADAMTS10	ADAMTS10_81794_6_5	CTCGGCTGACCGATCGCTTC	0.971885	1.11542	0.720332	0.623859	1.20799	0	0.0151946	0.0654895	0	0.0153029
ADAMTS10	ADAMTS10_81794_3_7	ATGTGGACACGTGGCCTCTA	0.128561	0.431136	0.562238	0.686213	-0.0869912	0	0.0151946	0.0654895	0	0.0153029
ADAMTS10	ADAMTS10_81794_3_2	CGAGGGCCCAGCGGAGGATC	0.270784	0.0357287	0.374392	0.117992	0.0224229	0	0.0151946	0.0654895	0	0.0153029
ADAMTS10	ADAMTS10_81794_4_4	CCTGCAGGTGACCAGCGTAG	-0.993209	-0.957304	-0.395237	-0.302415	-0.26547	0	0.0151946	0.0654895	0	0.0153029
ADAMTS10	ADAMTS10_81794_6_2	CACATCCCGGCGCCCGTGAT	0.157354	0.0667651	0.166063	0.0950156	-0.305791	0	0.0151946	0.0654895	0	0.0153029
ADAMTS10	ADAMTS10_81794_7_4	TGCTTCCCAGACTCGAGTCC	-0.32088	-0.0908451	-0.79001	-0.36514	0.110791	0	0.0151946	0.0654895	0	0.0153029
ADAMTS10	ADAMTS10_81794_6_7	TTCAAGGTCCGCAGCCACCA	0.493	-0.0295188	0.540733	0.2763	0.574721	0	0.0151946	0.0654895	0	0.0153029
ADAMTS10	ADAMTS10_81794_4_24	CACCCGCGTGGACCACAACG	0.441598	-0.120586	0.118933	0.396503	0.394287	0	0.0151946	0.0654895	0	0.0153029
ADAMTS10	ADAMTS10_81794_3_5	TCGAGGTCACGCACGCCTTC	-0.356724	0.465695	0.253288	0.531445	0.424951	0	0.0151946	0.0654895	0	0.0153029
ADAMTS10	ADAMTS10_81794_4_12	CCCGTTGTGGTCCACGCGGG	-0.692714	-0.563263	0.169774	0.258166	-0.124331	0	0.0151946	0.0654895	0	0.0153029
ADAMTS10	ADAMTS10_81794_5_3	ACATGTGGTCCACTTTCCTC	-0.92743	-0.919104	0.355785	0.0348484	-0.261585	0	0.0151946	0.0654895	0	0.0153029
ADAMTS20	ADAMTS20_80070_2_17	GCCGTCGTCAGCTTATGCGG	-1.71227	-0.650436	-0.899183	-2.03037	-0.0362696	0	0.0204585	0	0	0
ADAMTS20	ADAMTS20_80070_2_26	GAAACGCAGCTCCGAGGCGC	0.534509	-0.391668	0.323846	0.249676	-0.0540357	0	0.0204585	0	0	0
ADAMTS20	ADAMTS20_80070_2_4	GAAGCAGTGGCGCAGGTCCG	0.964169	0.550448	0.604674	0.346994	0.596211	0	0.0204585	0	0	0
ADAMTS20	ADAMTS20_80070_2_1	GCCTCCGCATAAGCTGACGA	0.227161	-1.3356	0.481408	0.410538	-0.329821	0	0.0204585	0	0	0
ADAMTS20	ADAMTS20_80070_2_10	CGTAGGCAGTGAAGCGATAG	0.00656751	-0.335595	0.315281	0.560351	-1.39061	0	0.0204585	0	0	0
ADAMTS20	ADAMTS20_80070_2_11	AAGCGATAGTGGGTTCGGAA	-0.18237	-0.568354	-0.476377	-0.72699	0.324021	0	0.0204585	0	0	0
ADAMTS20	ADAMTS20_80070_2_5	CAAGTGCACCTCGGTGTAGC	0.435888	0.134227	0.162892	0.0786319	0.435553	0	0.0204585	0	0	0
ADAMTS20	ADAMTS20_80070_2_22	CGAGGTGCACTTGGGAACCC	-1.67987	-1.2176	-1.01096	-2.09828	-0.887536	0	0.0204585	0	0	0
ADAMTS20	ADAMTS20_80070_2_7	GGCCAGAAAGGATGCATCGG	0.36363	-1.17982	-0.59223	-0.0550848	0.182581	0	0.0204585	0	0	0
ADAMTS20	ADAMTS20_80070_2_3	CCTGGCCGCGGTAGAAGCAG	-1.11978	-0.617559	-0.6503	0.39947	0.280624	0	0.0204585	0	0	0
ADAMTS20	ADAMTS20_80070_2_14	GTTTCTGCCGGCTGAAGTGG	-1.88754	-1.48374	-0.896623	-0.177966	-0.525411	0	0.0204585	0	0	0
ADAMTS20	ADAMTS20_80070_2_24	GATGCATCCTTTCTGGCCGC	0.841073	0.607795	0.584244	1.04637	1.00321	0	0.0204585	0	0	0
ADAMTS20	ADAMTS20_80070_2_12	CGGCATGGGTTCCAGCGCCT	0.118599	-0.467593	0.254519	0.577719	0.899471	0	0.0204585	0	0	0
ADAMTS20	ADAMTS20_80070_2_8	CATCGGCGGTCAGGTTCAGC	1.4082	-0.367302	-1.87282	0.228184	-0.423113	0	0.0204585	0	0	0
ADAMTS20	ADAMTS20_80070_8_1	CTTACGTGTGCCCAAGCTCA	0.0782804	-0.121985	0.322726	-0.531779	0.469418	0	0.0204585	0	0	0
ADAMTS20	ADAMTS20_80070_10_5	CTGTTACAGTACTGGTTACG	0.0534941	0.185826	0.0624028	0.635745	0.284555	0	0.0204585	0	0	0
ADAMTS20	ADAMTS20_80070_2_23	TCTGGCCGCCGGCTACACCG	-0.394965	0.0817025	0.367295	0.65178	-0.480633	0	0.0204585	0	0	0
ADAMTS20	ADAMTS20_80070_2_19	CCGCGGCCAGGTCAACTCAC	-1.08553	-0.670999	-0.329658	-0.550671	0.101556	0	0.0204585	0	0	0
ADAMTS20	ADAMTS20_80070_2_25	ACTATCGCTTCACTGCCTAC	-1.16888	-0.0687223	0.551768	0.428445	0.0536657	0	0.0204585	0	0	0
ADAMTS20	ADAMTS20_80070_2_28	CCCGAGCGGGTCAATGAGTT	-1.21701	-1.10323	-1.22148	-0.103976	0.190707	0	0.0204585	0	0	0
ADAMTSL3	ADAMTSL3_57188_9_1	GAACACAGCTTTAACAGCCC	0.480164	0.00402311	0.113356	-0.371862	-0.226874	0	0.276495	0	0	0.0192892
ADAMTSL3	ADAMTSL3_57188_10_4	GAACTGAACCACGCTGTCTT	0.971461	0.747114	2.28249	0.301915	0.583861	0	0.276495	0	0	0.0192892
ADAMTSL3	ADAMTSL3_57188_3_5	GGTCATCATAGCGATAAGTG	0.324549	0.181902	0.0579914	-1.01167	-0.49507	0	0.276495	0	0	0.0192892
ADAMTSL3	ADAMTSL3_57188_7_6	CTCCACCTGCAGGCTTGTAC	0.179965	-0.569822	-0.504239	-0.0988004	0.202155	0	0.276495	0	0	0.0192892
ADAMTSL3	ADAMTSL3_57188_6_4	GGATGGAACTCGTTGCAACA	1.19879	0.373345	1.14303	1.10891	0.973578	0	0.276495	0	0	0.0192892
ADAMTSL3	ADAMTSL3_57188_4_4	GAGGAGCATCATATTCTCTG	-0.194122	-0.47302	0.0453309	-0.373667	0.457816	0	0.276495	0	0	0.0192892
ADAMTSL3	ADAMTSL3_57188_12_2	TAACTCACCGAGGAAGAGGT	0.555289	0.0240524	0.456997	-0.0773569	0.338328	0	0.276495	0	0	0.0192892
ADAMTSL3	ADAMTSL3_57188_6_5	TCCTTGGACATGTGTATCAG	-0.406699	-0.254682	-0.956787	0.253862	-0.353018	0	0.276495	0	0	0.0192892
ADAMTSL3	ADAMTSL3_57188_6_8	GCAGCAGGATCATTATATCG	-0.0085507	0.376126	-0.07292	0.533475	0.391099	0	0.276495	0	0	0.0192892
ADAMTSL3	ADAMTSL3_57188_13_8	CCAAGTGGATTGCCATGGAG	1.30147	0.22066	0.473122	1.00356	0.858397	0	0.276495	0	0	0.0192892
ADAMTSL3	ADAMTSL3_57188_13_9	GACACGGAACATGCAGTCCA	0.901828	-0.0633174	0.947512	0.936757	1.13045	0	0.276495	0	0	0.0192892
ADAMTSL3	ADAMTSL3_57188_11_1	GCTCAATTCTGCTGAATGTG	0.137579	0.271831	-0.0519809	0.849262	-0.492299	0	0.276495	0	0	0.0192892
ADAMTSL3	ADAMTSL3_57188_6_10	CGAGTTCCATCCAGTACCTT	-0.0340409	0.686257	0.170592	0.22546	0.130335	0	0.276495	0	0	0.0192892
ADAMTSL3	ADAMTSL3_57188_6_7	ATTGTAGGCTGAGCACTGCT	1.18991	1.18449	1.17719	-0.163254	0.81107	0	0.276495	0	0	0.0192892
ADAMTSL3	ADAMTSL3_57188_3_3	TCGGGAAGGAAATAGGCTCC	0.195655	0.128845	-0.478553	-1.3013	-0.225486	0	0.276495	0	0	0.0192892
ADAMTSL3	ADAMTSL3_57188_14_3	GTTCTGTGTATTAACCACCG	0.739977	0.0679377	0.117931	-0.310977	-0.2798	0	0.276495	0	0	0.0192892
ADAMTSL3	ADAMTSL3_57188_6_9	ATGACACTTGAGTGCACACG	0.0669329	-0.0595614	0.297596	-0.652867	0.030206	0	0.276495	0	0	0.0192892
ADAMTSL3	ADAMTSL3_57188_10_6	CCTCCACACGTCACAGTGCA	1.65736	0.339612	1.10035	0.579147	0.872994	0	0.276495	0	0	0.0192892
ADAMTSL3	ADAMTSL3_57188_13_4	ACGGAGCTTTGTGTGTGTAG	0.0505226	-0.17721	0.156673	-0.854401	0.0425217	0	0.276495	0	0	0.0192892
ADAMTSL3	ADAMTSL3_57188_14_5	CAACCCGGTACCGTAACCCT	0.0237516	0.113452	-0.201815	-0.191268	-0.75568	0	0.276495	0	0	0.0192892
ADARB1	ADARB1_104_5_34	GCACGGGCCCAGTCTGGGAC	0.145997	0.850516	0.462748	0.0143112	0.568305	4.06536	9.05269	3.6283	5.26567	15.7519
ADARB1	ADARB1_sgADARB1_1	TTCTTCATCTTCTATATCCA	0.478933	0.321524	1.00614	1.07614	-0.969961	4.06536	9.05269	3.6283	5.26567	15.7519
ADARB1	ADARB1_sgADARB1_3	GGGACACGTTGTCCAGATTG	-0.193295	0.208786	-0.0417664	1.18237	-0.183981	4.06536	9.05269	3.6283	5.26567	15.7519
ADARB1	ADARB1_sgADARB1_5	GATGGCAGCACACCTGGGCC	1.03521	0.923123	0.92893	0.513496	1.06948	4.06536	9.05269	3.6283	5.26567	15.7519
ADARB1	ADARB1_sgADARB1_8	GAGAGCTGAGAGCCCTCGCC	0.872161	0.962045	0.878343	1.11446	1.55237	4.06536	9.05269	3.6283	5.26567	15.7519
ADARB1	ADARB1_104_5_8	GCCTTTGTTTGTCATGTCTG	-0.0674332	0.330597	-0.220552	0.0685442	-0.189355	4.06536	9.05269	3.6283	5.26567	15.7519
ADARB1	ADARB1_104_5_38	GAAGTCCGTGTTGACAGACA	1.08776	1.04869	0.745275	1.17225	0.0713037	4.06536	9.05269	3.6283	5.26567	15.7519
ADARB1	ADARB1_sgADARB1_10	GCCATTGCTGCCCTCCTCCA	-0.0402203	0.237487	0.26683	1.08032	-0.0409459	4.06536	9.05269	3.6283	5.26567	15.7519
ADARB1	ADARB1_104_5_41	AAGGGAGGCTCCGCCTTGTC	-1.23667	-0.629346	0.20765	-0.331306	-0.577589	4.06536	9.05269	3.6283	5.26567	15.7519
ADARB1	ADARB1_sgADARB1_9	GAGGGCTCTCAGCTCTCCAA	0.899265	0.60996	0.404926	-0.249119	1.4326	4.06536	9.05269	3.6283	5.26567	15.7519
ADARB1	ADARB1_sgADARB1_4	CCAGGTGTGCTGCCATCCTT	-0.750966	-0.678569	0.596602	0.763702	0.46918	4.06536	9.05269	3.6283	5.26567	15.7519
ADARB1	ADARB1_sgADARB1_7	TGAGAGCCCTCGCCAGGCCC	1.59025	1.32563	1.14164	0.243196	1.61674	4.06536	9.05269	3.6283	5.26567	15.7519
ADARB1	ADARB1_104_5_35	ACAAACAAAGGCGCGTGCAC	0.0135315	0.232857	-0.689575	-0.207652	-0.00126364	4.06536	9.05269	3.6283	5.26567	15.7519
ADARB1	ADARB1_sgADARB1_6	CAGCACACCTGGGCCTGGCG	0.964527	0.51131	0.151528	0.315344	0.702142	4.06536	9.05269	3.6283	5.26567	15.7519
ADARB1	ADARB1_104_5_40	AACCATTGAAGAGCGTGTCA	0.447537	0.562112	0.41183	0.391798	0.722765	4.06536	9.05269	3.6283	5.26567	15.7519
ADARB1	ADARB1_104_5_18	ATCTTGAACGAACTGCGCCC	0.541543	0.0827229	0.543034	-0.513302	-0.204398	4.06536	9.05269	3.6283	5.26567	15.7519
ADARB1	ADARB1_104_5_47	ACGGGATTCTTCCCACTCGG	0.885148	0.257459	0.409453	0.184323	0.060368	4.06536	9.05269	3.6283	5.26567	15.7519
ADARB1	ADARB1_104_5_5	CCAAGTACCGCCTGAAGAAA	0.459087	1.11863	0.89735	1.03176	0.987045	4.06536	9.05269	3.6283	5.26567	15.7519
ADARB1	ADARB1_sgADARB1_2	TTCCAGCAGCACTGATGTGA	1.74773	0.562845	1.02633	0.288263	0.217983	4.06536	9.05269	3.6283	5.26567	15.7519
ADARB1	ADARB1_104_5_42	CCCATTGGAGCCCACGTAAA	1.12243	0.743547	0.44145	0.682571	0.358017	4.06536	9.05269	3.6283	5.26567	15.7519
ADCY2	ADCY2_108_5_6	GGCGATGTGGGCCGGCAGCA	-0.437661	-1.48621	-0.0961854	-0.154907	-0.534138	0.00844762	0.00690755	0.011061	0	0.0181482
ADCY2	ADCY2_108_4_3	CGCTCTTCAGCAAACATATC	0.941907	-0.0454772	-0.0751342	0.97831	-0.193845	0.00844762	0.00690755	0.011061	0	0.0181482
ADCY2	ADCY2_108_1_9	AGACGATGAGCGGGTGCTGC	1.46521	0.718347	0.439679	0.647465	0.984549	0.00844762	0.00690755	0.011061	0	0.0181482
ADCY2	ADCY2_108_5_9	GCCGCTTCACATACAGGTTG	-0.706298	-0.163818	0.300217	0.724395	-0.151469	0.00844762	0.00690755	0.011061	0	0.0181482
ADCY2	ADCY2_108_6_2	GCTGGCAAGTGACTGCTCCC	0.329133	0.0882229	0.765214	0.286222	0.940706	0.00844762	0.00690755	0.011061	0	0.0181482
ADCY2	ADCY2_108_7_2	GCATGGTTAGGGAGAGATAT	1.05941	-0.274129	0.217279	1.3563	0.65714	0.00844762	0.00690755	0.011061	0	0.0181482
ADCY2	ADCY2_108_4_9	CCGCGACTTGATGCAATTAC	-0.646562	-0.362724	0.445864	-0.679847	-0.67628	0.00844762	0.00690755	0.011061	0	0.0181482
ADCY2	ADCY2_108_4_2	AGCCTACCATAAGCACCTCA	0.930301	0.70638	1.00821	0.367719	0.861706	0.00844762	0.00690755	0.011061	0	0.0181482
ADCY2	ADCY2_108_1_2	CTACCTGCGGGACCGCTCCG	1.01348	0.81178	0.855649	0.887069	0.384522	0.00844762	0.00690755	0.011061	0	0.0181482
ADCY2	ADCY2_108_4_6	GCTTATGGTAGGCTCCCGCC	-0.322806	-0.852704	-0.591566	-1.06603	-1.1587	0.00844762	0.00690755	0.011061	0	0.0181482
ADCY2	ADCY2_108_2_7	TCCATATCACCAACGAGAAG	0.563448	0.411281	-0.414133	0.109127	0.155573	0.00844762	0.00690755	0.011061	0	0.0181482
ADCY2	ADCY2_108_4_5	CATCAAGTCGCGGATCAAGT	0.782822	0.91947	0.502047	-0.265053	0.987949	0.00844762	0.00690755	0.011061	0	0.0181482
ADCY2	ADCY2_108_1_7	TAGAGCCAGTCCCGGGACCG	0.401798	0.70443	0.556511	0.183501	0.206982	0.00844762	0.00690755	0.011061	0	0.0181482
ADCY2	ADCY2_108_7_3	CACAGTTCTTGGCATGGTTA	0.201316	-0.0470683	-0.312458	-0.0780331	-0.0836001	0.00844762	0.00690755	0.011061	0	0.0181482
ADCY2	ADCY2_108_5_7	TTTCATCTCCATGGCGATGT	0.794636	0.426232	-0.0869067	0.0491486	-0.0309492	0.00844762	0.00690755	0.011061	0	0.0181482
ADCY2	ADCY2_108_4_4	CCTGTAATTGCATCAAGTCG	0.328615	0.53499	-0.458236	-0.346969	-0.454236	0.00844762	0.00690755	0.011061	0	0.0181482
ADCY2	ADCY2_108_2_8	ACAGGTATCCCATGGCAACA	0.915841	0.765756	0.209425	0.669953	1.06302	0.00844762	0.00690755	0.011061	0	0.0181482
ADCY7	ADCY7_113_1_31	AGGCAGTGGCGGCCACCAGC	0.0837152	-0.875068	-0.25254	1.09918	0.15017	9.15489	15.1636	11.9874	14.5021	0.477242
ADCY7	ADCY7_113_1_14	GGGCGCTACTTCCTCAACGA	-0.365248	-1.39884	-1.07994	-0.600102	0.0327875	9.15489	15.1636	11.9874	14.5021	0.477242
ADCY7	ADCY7_113_2_10	ATGTGCTGGTGTTCGACGCA	0.204435	1.41251	0.196479	0.00667449	-0.25901	9.15489	15.1636	11.9874	14.5021	0.477242
ADCY7	ADCY7_113_2_12	GGACAAAGGCGGCCTGTGCG	0.798618	0.882138	0.798198	-0.526415	0.512519	9.15489	15.1636	11.9874	14.5021	0.477242
ADCY7	ADCY7_113_2_6	GGGCCTTGGCGCTGCTCACC	0.488005	1.31616	0.965455	0.969482	1.85955	9.15489	15.1636	11.9874	14.5021	0.477242
ADCY7	ADCY7_113_6_3	GGCCAGCGACTGTTCTCCCA	0.491184	0.655303	0.514672	0.289544	-0.651141	9.15489	15.1636	11.9874	14.5021	0.477242
ADCY7	ADCY7_113_4_8	GCTTGTGGAAGGCGCCTGTC	-0.631888	0.761486	1.29849	0.16627	0.422539	9.15489	15.1636	11.9874	14.5021	0.477242
ADCY7	ADCY7_113_5_10	CTCCTTGAGCCGTTCGATGA	-0.178261	-0.0812899	-0.289301	-0.214492	0.38857	9.15489	15.1636	11.9874	14.5021	0.477242
ADCY7	ADCY7_113_4_5	TGAAGTGCATCCAGATCCGC	0.530218	1.28542	0.364654	0.721824	0.282373	9.15489	15.1636	11.9874	14.5021	0.477242
ADCY7	ADCY7_113_4_13	TGCGCAGCTTCCGGCGGATC	-0.27996	1.2151	0.165148	-0.232359	0.667591	9.15489	15.1636	11.9874	14.5021	0.477242
ADCY7	ADCY7_113_1_27	CGTAGAGCGCATCTTGGTCA	-0.304109	0.0099767	-0.817369	-0.552587	-0.352193	9.15489	15.1636	11.9874	14.5021	0.477242
ADCY7	ADCY7_113_2_18	CAGCGCCACCAAGCAGGCCC	-0.126848	0.0301684	1.68922	0.402171	1.00165	9.15489	15.1636	11.9874	14.5021	0.477242
ADCY7	ADCY7_113_5_12	AGGCTGTGGAAGTTGTTGTC	-1.2174	-1.02692	-0.225347	-0.647345	-0.77049	9.15489	15.1636	11.9874	14.5021	0.477242
ADCY7	ADCY7_113_6_7	CTCCTTGGGAGAACAGTCGC	0.602883	0.632047	-0.64194	0.0194842	0.102068	9.15489	15.1636	11.9874	14.5021	0.477242
ADCY7	ADCY7_113_5_14	TCACCGCCCACCTGACATTC	-0.688036	-0.616531	-0.0747912	-0.177637	0.00499104	9.15489	15.1636	11.9874	14.5021	0.477242
ADCY7	ADCY7_113_2_4	TGTACGTCGAGTGTCTCCTG	-2.09785	-0.877249	0.174028	-0.514195	-0.637498	9.15489	15.1636	11.9874	14.5021	0.477242
ADCY7	ADCY7_113_3_4	CCTGGTGCTCGGTTCTTTGA	0.432709	0.0173837	0.71367	-0.404173	0.65753	9.15489	15.1636	11.9874	14.5021	0.477242
ADCY7	ADCY7_113_5_5	ATCGAACGGCTCAAGGAGCA	0.809154	0.163833	0.760206	0.309988	-0.0543625	9.15489	15.1636	11.9874	14.5021	0.477242
ADCY7	ADCY7_113_1_17	CATCATCATTGCCTTCAGCC	1.37212	0.574518	1.62949	0.893845	1.18371	9.15489	15.1636	11.9874	14.5021	0.477242
ADCY7	ADCY7_113_2_2	CATTCTGGGCATGGCGTTCC	-0.732245	-0.430751	-1.10772	-0.23076	-1.18403	9.15489	15.1636	11.9874	14.5021	0.477242
ADIPOR1	ADIPOR1_51094_1_5	TCTTCTCCATCACGCACTTC	-1.30129	-0.470595	-0.272848	-1.12762	1.604	75.8537	63.1398	75.6385	66.3723	71.8705
ADIPOR1	ADIPOR1_51094_2_6	AGCGCCGCGGGATGTAGCGC	-1.19936	0.0375604	-1.69783	-1.03537	-1.43886	75.8537	63.1398	75.6385	66.3723	71.8705
ADIPOR1	ADIPOR1_51094_2_2	GCAGCCGCGTCACCTCCTCG	-0.0447364	1.14409	0.747983	0.388896	0.876084	75.8537	63.1398	75.6385	66.3723	71.8705
ADIPOR1	ADIPOR1_51094_1_2	GGAGGTTACCTGGCTGCGGC	-1.50181	-1.00908	-1.45612	-1.29603	-2.20485	75.8537	63.1398	75.6385	66.3723	71.8705
ADIPOR1	ADIPOR1_51094_1_4	TTCAGGCTGCGATAACGAGG	-0.714047	-0.894816	-0.166409	-0.183524	-0.626484	75.8537	63.1398	75.6385	66.3723	71.8705
ADIPOR1	ADIPOR1_51094_4_12	GCTGAAGCTGCAGGGTATTG	0.10205	-0.10069	-0.366073	1.21265	0.0850294	75.8537	63.1398	75.6385	66.3723	71.8705
ADIPOR1	ADIPOR1_51094_3_1	GCAAAGTCCATTGTCCAGTT	1.02888	1.2837	0.797395	0.377627	0.125012	75.8537	63.1398	75.6385	66.3723	71.8705
ADIPOR1	ADIPOR1_51094_2_11	GTGATTGGGACTCCGCGAGA	-1.15748	-0.0408938	0.406298	-0.174586	0.165778	75.8537	63.1398	75.6385	66.3723	71.8705
ADIPOR1	ADIPOR1_51094_2_7	ACGCGGCTGCGGAGGTGACG	-0.663499	-0.820655	-0.810331	-2.12541	-0.232454	75.8537	63.1398	75.6385	66.3723	71.8705
ADIPOR1	ADIPOR1_51094_2_8	GCGAGGAGGTGACGCGGCTG	0.325056	0.695023	0.65817	0.565219	0.933886	75.8537	63.1398	75.6385	66.3723	71.8705
ADIPOR1	ADIPOR1_51094_1_1	CAGGTAACCTCCACCCGCCC	-1.2559	-0.858966	-0.417989	-0.16428	-1.13837	75.8537	63.1398	75.6385	66.3723	71.8705
ADIPOR1	ADIPOR1_51094_4_6	GGGCAGAGATCTCCCTCTGA	0.00400318	0.0267522	-0.0503541	-0.268973	-0.392144	75.8537	63.1398	75.6385	66.3723	71.8705
ADIPOR1	ADIPOR1_51094_2_5	TCCAATCCTAGGCCCTCTCG	0.131687	-1.3147	0.247855	-0.750556	-0.284581	75.8537	63.1398	75.6385	66.3723	71.8705
ADIPOR1	ADIPOR1_51094_2_9	GGCCTAGGATTGGAGGGCCC	0.622148	0.762871	0.32229	0.373417	0.0546555	75.8537	63.1398	75.6385	66.3723	71.8705
ADIPOR1	ADIPOR1_51094_2_3	ACCTCCTCGCGGGCTCTGCC	1.51535	1.67076	1.23038	0.671545	1.19369	75.8537	63.1398	75.6385	66.3723	71.8705
ADIPOR1	ADIPOR1_51094_2_10	TCCGCGAGAGGGCCTAGGAT	-0.337917	-0.320561	0.033788	-0.238169	-0.364733	75.8537	63.1398	75.6385	66.3723	71.8705
ADIPOR1	ADIPOR1_51094_2_1	GCTACATCCCGCGGCGCTGG	-1.54231	-1.07826	-0.501029	-0.289197	-0.720607	75.8537	63.1398	75.6385	66.3723	71.8705
ADIPOR1	ADIPOR1_51094_2_4	TGCCTGGGCCCTCCAATCCT	1.44363	0.9993	1.28769	0.654005	0.88429	75.8537	63.1398	75.6385	66.3723	71.8705
ADIPOR1	ADIPOR1_51094_4_5	AATACCCTGCAGCTTCAGCT	0.340409	0.576248	0.446317	0.625309	0.94265	75.8537	63.1398	75.6385	66.3723	71.8705
ADIPOR1	ADIPOR1_51094_1_3	CCGACGAACGTCCTCTACCC	-1.57555	-1.46052	-0.867081	-1.77464	-0.837915	75.8537	63.1398	75.6385	66.3723	71.8705
ADM	ADM_133_4_24	GTAGCGCTTGACTCGGATGC	-2.53328	-0.303179	-0.214861	-1.44158	-1.6378	2.79568	0.0931873	2.51036	6.97849	250.021
ADM	ADM_133_3_7	GAGGCACCCTTCATGTCCTG	0.280592	1.23956	-0.761094	0.845355	0.266177	2.79568	0.0931873	2.51036	6.97849	250.021
ADM	ADM_133_2_3	TTCCGTCGCCCTGATGTACC	-1.0651	-0.920108	-0.740008	-1.65845	-1.02462	2.79568	0.0931873	2.51036	6.97849	250.021
ADM	ADM_133_2_11	CGACGCGACATCCAACCGAG	0.124009	0.94853	0.77205	0.450563	0.952728	2.79568	0.0931873	2.51036	6.97849	250.021
ADM	ADM_133_2_7	GACGGAAACCAGCTTCATCC	1.20627	1.14682	0.547235	0.572687	-0.262939	2.79568	0.0931873	2.51036	6.97849	250.021
ADM	ADM_133_3_2	GTCGTGGGAAGAGGGAACTG	-1.91075	-3.02417	-2.91112	-1.02944	-2.6986	2.79568	0.0931873	2.51036	6.97849	250.021
ADM	ADM_133_4_23	ACTCGGATGCGGGCGGCATC	1.55459	1.14608	0.811522	0.891689	0.263542	2.79568	0.0931873	2.51036	6.97849	250.021
ADM	ADM_133_3_1	AATAAGTGGGCTCTGAGTCG	-0.233424	-0.174765	-0.788021	-0.205863	0.21411	2.79568	0.0931873	2.51036	6.97849	250.021
ADM	ADM_133_2_4	CTGGGTTCGCTCGCCTTCCT	0.128746	-0.510073	-0.270418	0.895172	-0.115334	2.79568	0.0931873	2.51036	6.97849	250.021
ADM	ADM_133_2_2	CTTCGCAGCCGGGATGAAGC	0.281817	0.653906	0.107332	0.951842	0.337833	2.79568	0.0931873	2.51036	6.97849	250.021
ADM	ADM_133_2_6	CGCTCGGTTGGATGTCGCGT	-0.43222	-1.05376	-0.950217	-0.36723	0.00319913	2.79568	0.0931873	2.51036	6.97849	250.021
ADM	ADM_133_2_8	ACCCAGGTACATCAGGGCGA	0.108423	0.495833	0.306957	0.54816	0.34357	2.79568	0.0931873	2.51036	6.97849	250.021
ADM	ADM_133_2_9	CTAGGAAGGCGAGCGAACCC	-1.44401	-0.373645	-0.417361	0.265825	-0.263666	2.79568	0.0931873	2.51036	6.97849	250.021
ADM2	ADM2_79924_1_11	GTCGGGATCCGGGCCATGGC	0.422368	0.160076	-0.273597	-0.14803	-0.00175618	1.88973	1.66572	1.08831	0.00769806	1.27393
ADM2	ADM2_79924_2_130	CCCTCTGTGCCTGGAGGGCC	1.12591	0.889433	0.578711	0.696492	1.02295	1.88973	1.66572	1.08831	0.00769806	1.27393
ADM2	ADM2_79924_2_133	GCTGGGCTTGGGTCCTGCGG	-1.32906	-0.267577	-0.479205	0.0023671	-1.18735	1.88973	1.66572	1.08831	0.00769806	1.27393
ADM2	ADM2_79924_2_129	AGCTTCCAGACCACAGGTCG	0.0970185	0.424533	-0.285307	0.690506	0.208261	1.88973	1.66572	1.08831	0.00769806	1.27393
ADM2	ADM2_79924_2_132	TGGCGGCCACCATCCCGGAG	0.561495	0.984479	0.712024	-0.0111336	0.5436	1.88973	1.66572	1.08831	0.00769806	1.27393
ADM2	ADM2_79924_2_3	GAAGCTTCACCGGGCCCTCC	1.32376	1.72495	1.12393	1.31948	1.5899	1.88973	1.66572	1.08831	0.00769806	1.27393
ADM2	ADM2_79924_2_4	CGGGCCCTCCAGGCACAGAG	1.02827	0.707388	0.133416	0.77377	1.02198	1.88973	1.66572	1.08831	0.00769806	1.27393
ADM2	ADM2_79924_1_3	CGCCATGGCCCGGATCCCGA	-0.186779	0.553651	0.171875	0.986982	0.0850128	1.88973	1.66572	1.08831	0.00769806	1.27393
ADM2	ADM2_79924_2_8	CCTGCGAGTGGGCTGTGTGC	-0.318472	-0.384235	-0.513035	-0.304291	-0.375668	1.88973	1.66572	1.08831	0.00769806	1.27393
ADM2	ADM2_79924_2_127	CTGGAAGGGCTCCGGGCTGG	0.190843	0.475347	0.437405	-0.0882301	0.720585	1.88973	1.66572	1.08831	0.00769806	1.27393
ADM2	ADM2_79924_2_128	TGGGCTGCAGGCTGCTGGAA	-0.0751238	-1.16816	-0.300212	0.290679	0.48195	1.88973	1.66572	1.08831	0.00769806	1.27393
ADM2	ADM2_79924_1_12	TGCAACCCAGGGCGGCCGTC	0.339595	1.01014	0.662583	0.698445	0.769146	1.88973	1.66572	1.08831	0.00769806	1.27393
ADM2	ADM2_79924_2_134	CACTCGCAGGAGCTGGGCTT	-0.536358	0.437458	-0.527989	0.0930503	-0.433042	1.88973	1.66572	1.08831	0.00769806	1.27393
ADM2	ADM2_79924_2_7	CCAAGCCCAGCTCCTGCGAG	1.43403	1.24034	1.10923	1.18883	1.23595	1.88973	1.66572	1.08831	0.00769806	1.27393
ADM2	ADM2_79924_1_16	ACCTGGGTTTGACGGGTCGC	0.155769	0.788778	0.28839	-0.564295	-0.44305	1.88973	1.66572	1.08831	0.00769806	1.27393
ADM2	ADM2_79924_2_2	CTGTGGTCTGGAAGCTTCAC	-0.478713	0.0810582	-0.0284173	0.969212	0.499357	1.88973	1.66572	1.08831	0.00769806	1.27393
ADNP	ADNP_23394_5_117	GATTGGGCACACAAATGTAG	-0.611242	-0.193929	-1.07066	-0.323422	0.768023	30.7892	22.9681	37.9112	40.4221	23.5062
ADNP	ADNP_23394_5_57	CCTGATAGCCTATACGTTCA	0.0417169	0.711551	0.405412	-0.344445	0.177265	30.7892	22.9681	37.9112	40.4221	23.5062
ADNP	ADNP_sgADNP_3	AATACTTAGTGACATTGGGT	-0.32212	-1.09014	-0.676112	0.84898	0.57427	30.7892	22.9681	37.9112	40.4221	23.5062
ADNP	ADNP_sgADNP_7	GGACAAGCGCTGCAGCAGAA	0.807459	1.63858	0.689315	0.951978	1.41227	30.7892	22.9681	37.9112	40.4221	23.5062
ADNP	ADNP_sgADNP_2	AAACTGCCAAGATTGTTGAC	0.338653	1.08058	1.28542	0.454351	0.507503	30.7892	22.9681	37.9112	40.4221	23.5062
ADNP	ADNP_sgADNP_10	CTACTTGGTGCGCTGGCGTT	-1.1299	-1.08677	-0.567656	-1.11922	-0.791216	30.7892	22.9681	37.9112	40.4221	23.5062
ADNP	ADNP_23394_5_118	ATCAGGTCACTGCCATGATT	-1.12802	-0.368471	-0.779664	-0.180004	0.337757	30.7892	22.9681	37.9112	40.4221	23.5062
ADNP	ADNP_sgADNP_5	ATGGGAGGATGTAGGACTGT	-0.930533	0.178848	-0.62143	0.0555973	-0.00229056	30.7892	22.9681	37.9112	40.4221	23.5062
ADNP	ADNP_sgADNP_9	GTCTGCATTGAAGGTACAGT	-0.188524	-0.592973	-0.361939	0.179445	0.365053	30.7892	22.9681	37.9112	40.4221	23.5062
ADNP	ADNP_23394_5_60	TCTACACTGTCAGCCTGCTT	-0.829403	0.180222	0.0705802	0.0979803	0.617977	30.7892	22.9681	37.9112	40.4221	23.5062
ADNP	ADNP_23394_5_53	ACCGGACATTTCCAGAAGCA	0.269113	1.20664	0.836811	0.761608	0.808248	30.7892	22.9681	37.9112	40.4221	23.5062
ADNP	ADNP_sgADNP_4	AACACTACATGGGAGGATGT	0.199818	-0.103596	0.0959204	-0.776448	0.685757	30.7892	22.9681	37.9112	40.4221	23.5062
ADNP	ADNP_23394_5_58	TTCTCGGGCATTCGAGCCTA	0.262023	0.671207	0.818671	0.346158	0.652984	30.7892	22.9681	37.9112	40.4221	23.5062
ADNP	ADNP_sgADNP_6	TGTGTTTACTTTAGGACTAT	0.0613505	0.140108	-0.130462	0.267725	0.359877	30.7892	22.9681	37.9112	40.4221	23.5062
ADNP	ADNP_sgADNP_1	CAACTTCCTGTCAACAATCT	0.77409	0.540901	0.882007	0.717116	1.68886	30.7892	22.9681	37.9112	40.4221	23.5062
ADNP	ADNP_23394_5_122	TGATGGCCTTAAACCTAAGC	-0.156155	0.0291628	-0.0971369	0.718111	0.563709	30.7892	22.9681	37.9112	40.4221	23.5062
ADNP	ADNP_23394_5_56	TAGCATCAAGGGTTTGGATC	-0.77769	-0.390879	-0.130266	-0.752212	0.349225	30.7892	22.9681	37.9112	40.4221	23.5062
ADORA1	ADORA1_134_4_83	CTTCTGCGGGTCGCCGGAGG	-1.32008	-0.456848	-0.603777	-0.0998521	-0.635055	0.950938	1.43025	1.06831	1.37809	5.34565
ADORA1	ADORA1_134_4_6	GGGCAGCCAACGGCAGCATG	-0.641638	0.023646	0.340258	-0.586461	0.23512	0.950938	1.43025	1.06831	1.37809	5.34565
ADORA1	ADORA1_134_3_9	GTCGCTGGCGGTGGCTGATG	0.151541	-0.158399	-0.363295	-0.171042	-0.62034	0.950938	1.43025	1.06831	1.37809	5.34565
ADORA1	ADORA1_134_4_12	GGCGACCCGCAGAAGTACTA	0.848317	0.73971	0.162437	-0.216118	0.472683	0.950938	1.43025	1.06831	1.37809	5.34565
ADORA1	ADORA1_134_4_92	GCAATGTAGGTAAGGATGCT	0.477028	0.905962	0.100627	0.1031	0.857449	0.950938	1.43025	1.06831	1.37809	5.34565
ADORA1	ADORA1_134_3_25	AGGTGGCATCCCGCAGCGCC	0.438253	0.187111	0.593426	0.265876	0.461696	0.950938	1.43025	1.06831	1.37809	5.34565
ADORA1	ADORA1_134_4_13	GCTGAAGATCGCCAAGTCGC	2.08573	0.553955	1.15833	-0.11626	1.51687	0.950938	1.43025	1.06831	1.37809	5.34565
ADORA1	ADORA1_134_3_35	GGATCTTGACCCGGAGGTAG	-0.00925901	-0.285981	-1.16661	0.910333	0.106916	0.950938	1.43025	1.06831	1.37809	5.34565
ADORA1	ADORA1_134_4_7	GATCAAGTGCGAGTTCGAGA	0.88079	0.0686165	0.944139	-0.214045	1.1598	0.950938	1.43025	1.06831	1.37809	5.34565
ADORA1	ADORA1_134_4_1	AGGGCGGCGGTGGCCATAGC	-0.328857	-0.537898	-0.06338	0.0062607	0.166801	0.950938	1.43025	1.06831	1.37809	5.34565
ADORA1	ADORA1_134_4_75	GAGGATCCAGCAGCCGGCTA	0.965914	1.47046	0.65317	0.679057	0.702714	0.950938	1.43025	1.06831	1.37809	5.34565
ADORA1	ADORA1_134_3_4	ATCGCCCTGGTCTCTGTGCC	0.942826	1.40691	0.649657	-0.0214541	0.266429	0.950938	1.43025	1.06831	1.37809	5.34565
ADORA1	ADORA1_134_4_82	TGTTGAGCTGCTTGCGGATT	0.378084	0.578679	-0.306144	-0.345227	0.134212	0.950938	1.43025	1.06831	1.37809	5.34565
ADORA1	ADORA1_134_4_74	TATGGCCACCGCCGCCCTCC	0.142881	-0.0927205	0.221985	0.0018732	-0.00561129	0.950938	1.43025	1.06831	1.37809	5.34565
ADORA1	ADORA1_134_4_2	CTGCTGGATCCTCTCCTTCG	0.994925	0.662643	1.259	0.540204	0.0126777	0.950938	1.43025	1.06831	1.37809	5.34565
ADORA1	ADORA1_134_3_36	CGCTGTGGACTCACCGGAGA	0.342334	0.259327	0.964385	0.893301	0.362244	0.950938	1.43025	1.06831	1.37809	5.34565
ADORA1	ADORA1_134_3_3	CATCGAGGTGCTCATCGCCC	0.918535	0.955904	0.930653	0.9559	0.781211	0.950938	1.43025	1.06831	1.37809	5.34565
ADORA1	ADORA1_134_3_22	CGATGCCGATGTAGGCGGCC	0.557708	-0.138633	0.399735	0.319883	-0.887881	0.950938	1.43025	1.06831	1.37809	5.34565
ADORA1	ADORA1_134_4_78	TCGAACTCGCACTTGATCAC	-2.15349	0.0486145	-0.112879	-0.689689	0.239985	0.950938	1.43025	1.06831	1.37809	5.34565
ADORA1	ADORA1_134_3_16	TTGCTGTGGACCGCTACCTC	0.449264	0.960302	0.678351	1.47276	-0.359443	0.950938	1.43025	1.06831	1.37809	5.34565
ADRBK1	ADRBK1_sgADRBK1_4	CGTCGGCCAGCACCGCCTCC	-0.840151	-0.482238	-0.883287	-0.103654	-1.10336	47.0895	19.0303	68.4	30.21	23.4788
ADRBK1	ADRBK1_sgADRBK1_3	GGCGGACCTGGAGGCGGTGC	-0.285689	0.707679	-0.961574	-0.175284	0.848308	47.0895	19.0303	68.4	30.21	23.4788
ADRBK1	ADRBK1_156_4_5	GTCGAAGATCTCCCGGCTGC	0.291516	1.31201	1.22389	0.97755	0.808072	47.0895	19.0303	68.4	30.21	23.4788
ADRBK1	ADRBK1_sgADRBK1_5	GGCCGACGTGAGCTACCTGA	-2.0628	0.985539	-0.00405065	-0.627109	1.12307	47.0895	19.0303	68.4	30.21	23.4788
ADRBK1	ADRBK1_156_8_3	GGGTGCCGGAAGGCTGACAC	-2.23025	-0.868259	-0.401758	-0.899188	-0.407065	47.0895	19.0303	68.4	30.21	23.4788
ADRBK1	ADRBK1_sgADRBK1_6	CGTGAGCTACCTGATGGCCA	-0.485982	0.05147	0.0192112	-0.21233	0.547635	47.0895	19.0303	68.4	30.21	23.4788
ADRBK1	ADRBK1_sgADRBK1_7	CGTGGCCTTGCTCTTCTCCA	-1.12374	-1.38404	-0.527443	-0.285204	-0.978353	47.0895	19.0303	68.4	30.21	23.4788
ADRBK1	ADRBK1_sgADRBK1_9	GGGCAGCAGGATCTTCTTGC	0.447221	0.68023	-0.695483	-0.415078	0.868769	47.0895	19.0303	68.4	30.21	23.4788
ADRBK1	ADRBK1_156_9_3	GATGCGCTCGTTCAGGGCCA	-0.515025	-1.66408	-0.125829	0.47217	-0.723323	47.0895	19.0303	68.4	30.21	23.4788
ADRBK1	ADRBK1_156_1_10	GGCCATCAGGTAGCTCACGT	-0.578762	-0.704954	0.0233281	0.256636	-0.348016	47.0895	19.0303	68.4	30.21	23.4788
ADRBK1	ADRBK1_sgADRBK1_8	TTCTTGCTGGCGCGCGCGGC	-2.01234	-3.04577	-2.62535	-2.14573	-3.9674	47.0895	19.0303	68.4	30.21	23.4788
ADRBK1	ADRBK1_156_8_1	TTCAGCGTGCATCGCATCAT	0.831538	-0.643096	0.138484	1.08429	0.911504	47.0895	19.0303	68.4	30.21	23.4788
ADRBK1	ADRBK1_156_5_4	CACACCTGGAAGAGATCCGG	-2.20601	-0.902041	-0.279097	-0.607384	-0.334437	47.0895	19.0303	68.4	30.21	23.4788
ADRBK1	ADRBK1_156_1_9	CAGGTCCGCCATCTTGGCGG	1.09831	0.855921	1.02563	0.553815	0.339951	47.0895	19.0303	68.4	30.21	23.4788
ADRBK1	ADRBK1_156_9_1	TAGGTACGCCATGAAGTGCC	-0.154943	-0.211483	-0.442861	-0.736534	1.03329	47.0895	19.0303	68.4	30.21	23.4788
ADRBK1	ADRBK1_sgADRBK1_2	CAAGATGGCGGACCTGGAGG	-0.964304	0.334675	0.387044	0.132783	-0.577131	47.0895	19.0303	68.4	30.21	23.4788
ADRBK1	ADRBK1_156_8_2	TTGGCGAGGTCTATGGGTGC	-1.78582	-1.75934	-1.96855	-0.32881	-1.31748	47.0895	19.0303	68.4	30.21	23.4788
ADRBK1	ADRBK1_sgADRBK1_10	AGATCCTGCTGCCCGAGCCC	0.312243	-0.318792	0.731375	0.882566	0.993702	47.0895	19.0303	68.4	30.21	23.4788
ADRBK1	ADRBK1_156_2_4	TCTCAAAGGTCACCTCGCCC	-1.77738	-0.554079	-0.0837113	-0.782832	0.66862	47.0895	19.0303	68.4	30.21	23.4788
ADRBK1	ADRBK1_sgADRBK1_1	CGCCGCCAAGATGGCGGACC	0.446131	-0.0745616	0.398075	0.792683	0.61291	47.0895	19.0303	68.4	30.21	23.4788
ADRM1	ADRM1_sgADRM1_5	GGGCGCCTCCAACAAGTACT	-1.34537	0.597765	-0.919163	-1.39797	-1.15285	105.733	165.368	142.359	160.729	216.619
ADRM1	ADRM1_sgADRM1_9	GGCGGGAAAGATGTCCCTGA	-2.22801	0.628719	-1.28592	-0.409751	-2.08081	105.733	165.368	142.359	160.729	216.619
ADRM1	ADRM1_11047_3_3	AGTTCAAGGCAGGGTCCAAG	-0.854563	-0.650463	-0.618441	-0.791731	-1.30012	105.733	165.368	142.359	160.729	216.619
ADRM1	ADRM1_11047_3_5	GCACGTAGACCCTCCCGCTG	-2.28108	-0.86051	-1.61586	-1.08724	-1.65306	105.733	165.368	142.359	160.729	216.619
ADRM1	ADRM1_11047_4_6	TTCGTGGCCGCTGCTTCCGC	0.368118	0.127197	-0.0459241	0.445459	-0.24586	105.733	165.368	142.359	160.729	216.619
ADRM1	ADRM1_11047_3_2	GGTCTACGTGCTGAAGTTCA	-1.75623	-0.311859	-0.661067	-0.30301	-0.421064	105.733	165.368	142.359	160.729	216.619
ADRM1	ADRM1_11047_2_9	ACTCGCTTATTCACTTCTGC	-2.1462	-0.723205	-2.39615	-1.70568	-2.84502	105.733	165.368	142.359	160.729	216.619
ADRM1	ADRM1_sgADRM1_1	GCTTTCAGGATGACGACCTC	-1.37529	-0.293159	-0.99818	-1.51713	-1.16849	105.733	165.368	142.359	160.729	216.619
ADRM1	ADRM1_sgADRM1_4	CGAGAGCCTGGCACCAGGCT	-0.519914	0.292906	-0.457329	-0.561139	-0.415949	105.733	165.368	142.359	160.729	216.619
ADRM1	ADRM1_sgADRM1_3	CTCTTTCCAAGCCTGGTGCC	0.620467	1.22898	1.03831	0.340705	0.308948	105.733	165.368	142.359	160.729	216.619
ADRM1	ADRM1_11047_3_4	GCTTGAACTCACAGTCGTCA	-1.2988	-0.304087	-0.785622	-0.391622	-2.39665	105.733	165.368	142.359	160.729	216.619
ADRM1	ADRM1_sgADRM1_7	ACAAGTACTTGGTGGAGTTT	-0.866682	-0.502375	-1.41278	-1.19028	-0.79337	105.733	165.368	142.359	160.729	216.619
ADRM1	ADRM1_11047_2_15	ACCAGCCCTTTCCGCTTATC	-0.996138	-0.0514654	-1.40225	-0.538167	-1.54918	105.733	165.368	142.359	160.729	216.619
ADRM1	ADRM1_sgADRM1_2	GCTTGGAAAGAGCGCGCCTG	-1.91891	-0.754072	-1.455	-1.02429	-2.02937	105.733	165.368	142.359	160.729	216.619
ADRM1	ADRM1_11047_4_5	TCCGGCAATGCTCCTCATCC	-1.58795	-0.402636	-1.10524	-0.085601	-2.01982	105.733	165.368	142.359	160.729	216.619
ADRM1	ADRM1_11047_2_7	TCCGGATAAGCGGAAAGGGC	-1.51694	-1.08479	-2.27034	-0.619864	-2.36954	105.733	165.368	142.359	160.729	216.619
ADRM1	ADRM1_11047_2_14	CCGCTTATCCGGAGTCACGG	-2.38112	-0.915185	-1.86286	-0.731158	-3.31302	105.733	165.368	142.359	160.729	216.619
ADRM1	ADRM1_sgADRM1_8	TACTTGGTGGAGTTTCGGGC	-0.140271	-0.403686	-1.43779	-0.483149	-1.339	105.733	165.368	142.359	160.729	216.619
ADRM1	ADRM1_sgADRM1_6	CTCCACCAAGTACTTGTTGG	-1.45236	-0.661055	-1.61158	-0.274193	-0.794761	105.733	165.368	142.359	160.729	216.619
ADRM1	ADRM1_sgADRM1_10	CCACCGTGACTCCGGATAAG	-0.862919	-0.370178	-1.11928	-0.497605	-2.81374	105.733	165.368	142.359	160.729	216.619
ADTRP	ADTRP_84830_5_5	GACGACTTCAGCCAATGTGA	1.11046	1.27538	1.50178	0.199308	0.713664	0	3.71895	0	23.219	1.05739
ADTRP	ADTRP_84830_6_7	CCGTCTCAAAGTAGAGCCAT	-0.94066	-0.373843	0.478987	-0.0751468	-0.960603	0	3.71895	0	23.219	1.05739
ADTRP	ADTRP_84830_1_11	TCTTGGCAAATGGTGCAAGG	-0.877586	0.0636109	-0.243424	-0.471484	-0.175224	0	3.71895	0	23.219	1.05739
ADTRP	ADTRP_84830_2_3	GGGTTTGACATCTACCAGCC	1.04629	0.791864	0.0427216	1.24668	-0.233625	0	3.71895	0	23.219	1.05739
ADTRP	ADTRP_84830_3_1	GCAGGTCTCTGAAGGCAGTT	0.386419	-0.0409291	0.233631	-0.52958	-0.802695	0	3.71895	0	23.219	1.05739
ADTRP	ADTRP_84830_2_2	TCTACCAGCCAGGAAGCTTT	0.850995	-0.169996	0.689171	0.933198	0.1787	0	3.71895	0	23.219	1.05739
ADTRP	ADTRP_84830_5_2	AATGCTGGCAGCAGCCAGCA	0.779232	0.807304	-0.0162841	0.165747	0.372068	0	3.71895	0	23.219	1.05739
ADTRP	ADTRP_84830_4_2	GATGACAGTATCTAGGACCT	0.129783	0.287422	0.0481161	0.59253	0.75474	0	3.71895	0	23.219	1.05739
ADTRP	ADTRP_84830_6_11	CTACTTTGAGACGGGTACCT	-0.0180632	0.421528	0.771285	-0.163011	0.643372	0	3.71895	0	23.219	1.05739
ADTRP	ADTRP_84830_5_1	CCGGCTGATGTAAGCAATGC	-1.40457	-1.07249	-1.18565	-0.173783	-1.85714	0	3.71895	0	23.219	1.05739
ADTRP	ADTRP_84830_5_7	CATTGGCTGAAGTCGTCCTC	0.36649	-0.399161	0.252779	0.385008	0.477874	0	3.71895	0	23.219	1.05739
ADTRP	ADTRP_84830_1_3	TCGTCATGGCGAGTGCTGAC	0.354357	0.718704	0.500961	0.562267	0.985124	0	3.71895	0	23.219	1.05739
ADTRP	ADTRP_84830_2_1	CAAACCTGCCTAAAGCTTCC	0.746354	-0.1082	0.486902	0.575176	-0.211267	0	3.71895	0	23.219	1.05739
ADTRP	ADTRP_84830_1_1	ACCAGCTCAGAACAAGGAAG	1.85329	-0.176559	1.00685	0.392269	0.532608	0	3.71895	0	23.219	1.05739
ADTRP	ADTRP_84830_2_4	AGCTCAAGAACAGGACTGCT	1.64022	1.60541	1.9367	1.30553	1.60152	0	3.71895	0	23.219	1.05739
ADTRP	ADTRP_84830_1_12	ACCACTTCCTTGTTCTGAGC	0.521001	0.216828	0.0418716	0.267725	-0.150665	0	3.71895	0	23.219	1.05739
ADTRP	ADTRP_84830_4_1	CATTGCATGATTCAGCCACA	0.630582	-0.126624	0.636895	0.400537	0.560456	0	3.71895	0	23.219	1.05739
AEN	AEN_sgAEN_2	GGATGGTGAGGGAAGGGCAC	-1.18213	-0.516426	-2.12016	-2.61251	-0.674746	30.8874	56.2923	43.36	40.2614	21.5008
AEN	AEN_64782_3_3	CGCGCTGCACAACGACTTCC	-0.0336445	0.212482	1.50088	-0.00443791	1.1902	30.8874	56.2923	43.36	40.2614	21.5008
AEN	AEN_sgAEN_7	CCTCTTCCGAAGCACATCCT	1.81241	0.537564	0.947641	0.577491	0.990304	30.8874	56.2923	43.36	40.2614	21.5008
AEN	AEN_64782_2_15	TGTGGCTATCGACTGTGAGA	-0.447031	-0.190609	-0.626664	-0.490128	0.0735843	30.8874	56.2923	43.36	40.2614	21.5008
AEN	AEN_64782_2_37	GCCTGATGTACTTGTCATAG	-2.32672	0.0128581	-0.957485	-1.08973	-0.660346	30.8874	56.2923	43.36	40.2614	21.5008
AEN	AEN_64782_2_34	AGCTCGCTTACCCGCCCTCG	0.827647	0.734007	-0.881352	0.588716	-0.44892	30.8874	56.2923	43.36	40.2614	21.5008
AEN	AEN_sgAEN_1	ACAGGCACTGAGCAGACTCA	0.307839	0.531988	0.0528911	-0.269394	1.17711	30.8874	56.2923	43.36	40.2614	21.5008
AEN	AEN_sgAEN_9	GAAGGAGCCGACAGCACCAG	0.933518	0.332777	1.15311	0.526864	0.839289	30.8874	56.2923	43.36	40.2614	21.5008
AEN	AEN_sgAEN_6	CGAAGCACATCCTTGGCATT	0.698973	-0.116432	0.221603	-0.194864	-0.737604	30.8874	56.2923	43.36	40.2614	21.5008
AEN	AEN_sgAEN_10	CCATGAACCGCTGGTGCTGT	-0.784757	0.293125	0.443328	-0.136697	-0.265047	30.8874	56.2923	43.36	40.2614	21.5008
AEN	AEN_sgAEN_5	CACATCCTTGGCATTTGGGA	0.188736	-1.02446	-0.989863	-0.694224	-1.57755	30.8874	56.2923	43.36	40.2614	21.5008
AEN	AEN_64782_2_21	CACTCGGCAGCACATGCGCA	0.9046	0.664293	0.508526	0.0225195	0.246422	30.8874	56.2923	43.36	40.2614	21.5008
AEN	AEN_64782_2_20	CCCGCTGGAGTGGCATCACT	-0.222149	0.0817981	-0.0405002	-0.113753	0.548659	30.8874	56.2923	43.36	40.2614	21.5008
AEN	AEN_sgAEN_8	TTCGGAAGAGGCACAAGAGA	0.960194	-0.16906	0.0710565	0.373392	0.731405	30.8874	56.2923	43.36	40.2614	21.5008
AEN	AEN_sgAEN_4	CTTGGCATTTGGGATGGTGA	-0.620784	-0.298672	-0.420262	-1.13078	-0.326529	30.8874	56.2923	43.36	40.2614	21.5008
AEN	AEN_64782_2_17	CCGAGGGCGGGTAAGCGAGC	-1.03158	-0.482762	-1.16054	-1.37039	-1.47526	30.8874	56.2923	43.36	40.2614	21.5008
AEN	AEN_sgAEN_3	CATTTGGGATGGTGAGGGAA	-0.0276579	-0.297448	-0.261386	-0.289414	-1.10474	30.8874	56.2923	43.36	40.2614	21.5008
AEN	AEN_64782_2_36	TGTCATAGAGGACATTGCCA	0.948098	1.07682	0.555624	0.51489	0.971808	30.8874	56.2923	43.36	40.2614	21.5008
AFF1	AFF1_4299_3_16	GAGCGCCGCGTCCGAATCCG	-1.47114	-0.777761	0.722001	1.09308	-0.988953	6.86327	6.57338	4.30816	8.28235	5.53011
AFF1	AFF1_4299_3_1	GGCCCGCGTTGTGCTGTTGC	0.659095	-0.345248	-0.851106	-1.40661	-0.345105	6.86327	6.57338	4.30816	8.28235	5.53011
AFF1	AFF1_4299_3_13	GCCCAGCAACAGCACAACGC	1.04668	1.56425	0.524261	0.697227	0.71716	6.86327	6.57338	4.30816	8.28235	5.53011
AFF1	AFF1_sgAFF1_7	GGGAAACTACGAAGAAGTGA	0.950733	0.622654	0.501631	-0.166198	0.554164	6.86327	6.57338	4.30816	8.28235	5.53011
AFF1	AFF1_4299_3_5	GATTCGGACGCGGCGCTCCC	0.674802	1.06846	0.381709	0.152728	0.843961	6.86327	6.57338	4.30816	8.28235	5.53011
AFF1	AFF1_sgAFF1_2	AGAGAAGGAAAGACGCAACC	1.12699	1.24013	1.09118	0.39967	1.10954	6.86327	6.57338	4.30816	8.28235	5.53011
AFF1	AFF1_4299_3_6	TGAAGTGCAGATCGCCGCAG	1.22613	-0.220265	0.643168	0.446047	0.655558	6.86327	6.57338	4.30816	8.28235	5.53011
AFF1	AFF1_sgAFF1_8	GAGTGTGAGACTTAGTACTA	1.20637	0.198484	-0.0827026	-0.198776	0.236955	6.86327	6.57338	4.30816	8.28235	5.53011
AFF1	AFF1_sgAFF1_6	TAGTCGAATACAGAACATGT	-0.435946	0.061228	-0.366038	-0.0866081	-0.521506	6.86327	6.57338	4.30816	8.28235	5.53011
AFF1	AFF1_sgAFF1_5	TGTTCAGTAAATACCTTGTA	0.262035	-0.35313	0.00689799	0.274757	-0.623519	6.86327	6.57338	4.30816	8.28235	5.53011
AFF1	AFF1_sgAFF1_4	AAATGCCTCTTTCTCTTGGT	-0.506706	-0.22244	-0.332641	0.129199	-0.249256	6.86327	6.57338	4.30816	8.28235	5.53011
AFF1	AFF1_sgAFF1_9	TAAGTCTCACACTCATCGCC	-0.463676	-0.814716	-0.31113	-1.15441	-0.795232	6.86327	6.57338	4.30816	8.28235	5.53011
AFF1	AFF1_4299_3_15	CCCGGCGCAGTTTCTGAGAA	1.06851	1.54065	1.02161	0.656218	0.419298	6.86327	6.57338	4.30816	8.28235	5.53011
AFF1	AFF1_4299_3_19	TTGGCTCGCGCTAATCCTGA	0.534253	-1.06909	-0.360483	-0.21096	-0.511906	6.86327	6.57338	4.30816	8.28235	5.53011
AFF1	AFF1_sgAFF1_10	TCAGGAATTAAAGGATATTT	0.205005	0.0325625	-0.128899	0.273768	1.20009	6.86327	6.57338	4.30816	8.28235	5.53011
AFF1	AFF1_sgAFF1_1	CCTGCTTCGAATTAGAGAGA	0.199666	-0.0308943	-0.0609509	-0.568333	0.373523	6.86327	6.57338	4.30816	8.28235	5.53011
AFF1	AFF1_4299_3_8	AGGATTAGCGCGAGCCAATA	0.530106	-0.221874	0.276569	0.0255801	0.470164	6.86327	6.57338	4.30816	8.28235	5.53011
AFF1	AFF1_4299_3_17	CTGCACTTCAGACGAGCCCG	1.12837	0.637405	1.14684	0.568563	0.88906	6.86327	6.57338	4.30816	8.28235	5.53011
AFF1	AFF1_sgAFF1_3	CTTTCTCTTGGTGGGCTTCC	-0.353994	-0.559113	0.494986	-0.498305	0.666405	6.86327	6.57338	4.30816	8.28235	5.53011
AFF4	AFF4_27125_3_11	AGCGTTGATGTTCCTTGCTA	-1.19807	-0.203811	-0.142135	-0.546684	-1.22047	20.8974	13.6312	20.2844	12.4213	12.2594
AFF4	AFF4_27125_3_35	CAGTCTCAGAAACGGTCCTC	-1.15959	0.498685	-0.390238	0.0869732	0.31515	20.8974	13.6312	20.2844	12.4213	12.2594
AFF4	AFF4_27125_3_3	GCTCAGTCATGCTGTTGCCA	0.41321	0.339547	-0.177881	1.00413	1.32955	20.8974	13.6312	20.2844	12.4213	12.2594
AFF4	AFF4_sgAFF4_5	GTATGAAAGAACGGGAAAGG	-0.555548	-0.182494	-0.545414	-0.201127	-0.303632	20.8974	13.6312	20.2844	12.4213	12.2594
AFF4	AFF4_27125_3_15	GCCACTACTGCTACCTGCGC	-0.29615	-0.282676	0.51384	0.721773	-0.849144	20.8974	13.6312	20.2844	12.4213	12.2594
AFF4	AFF4_27125_3_28	AAATCACGTTCTTCCAGCCC	-0.230479	0.0410284	0.627895	0.385871	0.961741	20.8974	13.6312	20.2844	12.4213	12.2594
AFF4	AFF4_27125_3_31	ACCAGCGCAGGTAGCAGTAG	-0.366548	0.721835	0.375364	0.167403	1.80911	20.8974	13.6312	20.2844	12.4213	12.2594
AFF4	AFF4_sgAFF4_4	TGTGCTGCGTATGAAAGAAC	-0.779011	0.0217852	0.0893311	0.442	0.181937	20.8974	13.6312	20.2844	12.4213	12.2594
AFF4	AFF4_sgAFF4_10	GGGCAACTTACAACTTTGTA	0.15618	0.0394038	0.550861	1.03075	1.13102	20.8974	13.6312	20.2844	12.4213	12.2594
AFF4	AFF4_sgAFF4_7	CGGAATCAGGAAATTCAGCA	0.308494	0.715756	0.716272	1.27969	1.35617	20.8974	13.6312	20.2844	12.4213	12.2594
AFF4	AFF4_27125_3_7	TCCGTCCATGGGCCGCACAT	-1.33632	-0.182453	-0.92183	0.446513	-0.690139	20.8974	13.6312	20.2844	12.4213	12.2594
AFF4	AFF4_sgAFF4_3	CTTTCATACGCAGCACATTC	-0.337596	-0.189363	-0.60117	0.0335875	-0.499212	20.8974	13.6312	20.2844	12.4213	12.2594
AFF4	AFF4_27125_3_14	TGGAGTGTTCTGATCCATGC	0.312232	0.357075	0.2753	0.241505	0.150119	20.8974	13.6312	20.2844	12.4213	12.2594
AFF4	AFF4_27125_3_24	TCGGGACCCTGATGCAAACT	0.23692	0.0599418	-1.02636	-0.461134	-0.470105	20.8974	13.6312	20.2844	12.4213	12.2594
AFF4	AFF4_sgAFF4_9	TTGTATGGCTCTGCAAAGAG	-0.92642	-0.130982	-0.14916	0.528446	1.20809	20.8974	13.6312	20.2844	12.4213	12.2594
AFF4	AFF4_27125_2_6	TGCGTATGAAAGAACGGGAA	-1.17545	-0.403218	0.309149	-0.69625	-0.498597	20.8974	13.6312	20.2844	12.4213	12.2594
AFF4	AFF4_sgAFF4_8	TCTGCAAAGAGAGGAGAGCT	0.21404	0.474005	0.243069	0.769428	1.12537	20.8974	13.6312	20.2844	12.4213	12.2594
AFF4	AFF4_sgAFF4_6	AGAACGGGAAAGGCGGAATC	0.0215579	0.531045	0.514796	0.324338	0.413246	20.8974	13.6312	20.2844	12.4213	12.2594
AFG3L2	AFG3L2_10939_8_9	GGAGGCCAAGCTAGAGATCA	-0.908182	-3.7439	-1.30614	-2.09898	-1.77156	62.185	40.9667	41.8802	38.0385	42.1952
AFG3L2	AFG3L2_10939_8_11	GTGAAGTTCAAAGATGTGGC	-1.45548	-1.72426	-2.06242	-3.57947	-2.00527	62.185	40.9667	41.8802	38.0385	42.1952
AFG3L2	AFG3L2_10939_8_7	AAGGCGATGATGAGCACCGT	-1.09763	-0.451257	-0.774266	-1.41684	-1.94493	62.185	40.9667	41.8802	38.0385	42.1952
AFG3L2	AFG3L2_10939_1_1	CAGGCACGAGGAGCTGCTGT	-2.56941	-2.69291	-2.35987	-2.49343	-2.18777	62.185	40.9667	41.8802	38.0385	42.1952
AFG3L2	AFG3L2_10939_5_2	CCCAGAACAGAGCAGTCCAG	-1.36813	-2.40822	-1.32741	-2.19656	-2.31272	62.185	40.9667	41.8802	38.0385	42.1952
AFG3L2	AFG3L2_10939_9_2	GACATTGGCTTCTCCGGCTG	-1.41414	-2.691	-2.00106	-2.43322	-2.17675	62.185	40.9667	41.8802	38.0385	42.1952
AFG3L2	AFG3L2_10939_5_8	TGCCCAGGGTGACATTCCAT	-2.01002	-1.96813	-1.53958	-1.89587	-1.86162	62.185	40.9667	41.8802	38.0385	42.1952
AFG3L2	AFG3L2_10939_1_7	CACCGCTGTTTGCGGCTGTG	0.611232	0.329232	0.506808	-0.0734553	0.0267372	62.185	40.9667	41.8802	38.0385	42.1952
AFG3L2	AFG3L2_10939_4_1	TCCTCCTCCAGAAGAGCGTG	-2.04336	-2.95921	-3.55161	-3.95107	-3.42942	62.185	40.9667	41.8802	38.0385	42.1952
AFG3L2	AFG3L2_10939_8_13	ATGGGCGGACTCTTCAGTGT	-0.111643	-1.05935	-0.465806	-0.0495939	-1.73351	62.185	40.9667	41.8802	38.0385	42.1952
AFG3L2	AFG3L2_10939_4_5	ACACGCTCTTCTGGAGGAGG	0.238823	-0.177263	0.446972	-0.860136	-0.12503	62.185	40.9667	41.8802	38.0385	42.1952
AFG3L2	AFG3L2_10939_8_17	TCTGCTGAGCATGCTGCCTA	-1.34249	-2.16269	-1.34319	-2.39178	-2.5656	62.185	40.9667	41.8802	38.0385	42.1952
AFG3L2	AFG3L2_10939_1_6	CTCCTCGTGCCTGGCGGCGT	0.34054	-0.620973	-0.951357	-1.61729	-0.934284	62.185	40.9667	41.8802	38.0385	42.1952
AFG3L2	AFG3L2_10939_8_3	TGAAGAGTCCGCCCATCCCT	-0.39683	-1.92999	-0.867686	-3.05326	-2.63643	62.185	40.9667	41.8802	38.0385	42.1952
AFG3L2	AFG3L2_10939_9_9	CTGAAGGGTGCCATTCTCAC	-1.48928	-3.18147	-2.8555	-2.51874	-2.75153	62.185	40.9667	41.8802	38.0385	42.1952
AFG3L2	AFG3L2_10939_8_12	AACCACTGCCAAGGTCTTAA	0.261672	-1.02818	-0.838855	-0.905299	-1.1464	62.185	40.9667	41.8802	38.0385	42.1952
AFG3L2	AFG3L2_10939_8_2	ATCCTTTAAGACCTTGGCAG	-0.734103	-0.962627	-0.849721	-1.50847	-0.869479	62.185	40.9667	41.8802	38.0385	42.1952
AFG3L2	AFG3L2_10939_5_6	CTCTGGACTGCTCTGTTCTG	-1.29564	-2.29348	-1.65887	-2.29647	-0.915736	62.185	40.9667	41.8802	38.0385	42.1952
AFG3L2	AFG3L2_10939_8_14	CGGACAGGCCGAGGGATGGG	-1.37018	-2.51703	-2.62815	-2.06461	-2.59858	62.185	40.9667	41.8802	38.0385	42.1952
AFP	AFP_174_7_7	GCAACAGTGCTCATGTACAT	0.905694	-0.867473	0.460276	-0.0904768	0.117995	0.504413	0.732747	0	0.0457356	0.406443
AFP	AFP_174_8_1	ATGCTGCAAACTGACCACGC	0.311608	0.552189	0.0671093	1.48967	0.656976	0.504413	0.732747	0	0.0457356	0.406443
AFP	AFP_174_10_1	CATCCAGGAGAGCCAAGCAT	0.398443	0.705273	0.219707	1.20023	0.592207	0.504413	0.732747	0	0.0457356	0.406443
AFP	AFP_174_7_2	GTACATGAGCACTGTTGCAG	-0.00270089	-0.703528	-0.420367	-0.101719	0.0363167	0.504413	0.732747	0	0.0457356	0.406443
AFP	AFP_174_4_3	AGTGGGATCGATGCTGGAGT	1.63315	0.554989	0.65728	0.927197	0.522537	0.504413	0.732747	0	0.0457356	0.406443
AFP	AFP_174_7_5	CCACATCCAGGACTAGTTTC	0.519464	0.680736	0.826671	0.640234	1.38965	0.504413	0.732747	0	0.0457356	0.406443
AFP	AFP_174_7_4	AGATGTGCTGGATTGTCTGC	1.20489	0.342559	0.832949	-0.262612	-0.148661	0.504413	0.732747	0	0.0457356	0.406443
AFP	AFP_174_3_1	ACTGCAATTGAGAAACCCAC	0.94557	-0.128385	0.584561	0.556222	0.832231	0.504413	0.732747	0	0.0457356	0.406443
AFP	AFP_174_8_2	ACATTGACCACGTTCCAGCG	1.29112	0.71388	1.1059	0.0163854	0.544022	0.504413	0.732747	0	0.0457356	0.406443
AFP	AFP_174_5_1	GCAGCCCAAAGAAGAATTGT	0.569061	0.516787	0.20189	-0.265542	0.750801	0.504413	0.732747	0	0.0457356	0.406443
AFP	AFP_174_4_5	TATGCTTCACAGCTTGTGAC	-0.0692582	-0.822896	0.297142	0.0893471	0.320793	0.504413	0.732747	0	0.0457356	0.406443
AFP	AFP_174_7_3	CTGTTGCAGAGGAGATGTGC	0.560021	-0.124614	-0.115948	0.0912292	-0.412935	0.504413	0.732747	0	0.0457356	0.406443
AFP	AFP_174_4_2	CAAAGTTCTTCCAGAAAGGC	0.552618	-0.893578	-0.139746	0.0540666	-0.334376	0.504413	0.732747	0	0.0457356	0.406443
AFP	AFP_174_9_1	ATTACTGAGACAGCAAGCTG	-0.140001	-0.414049	0.438735	0.342911	0.616937	0.504413	0.732747	0	0.0457356	0.406443
AFP	AFP_174_7_6	CATGTACATGGGCCACATCC	-0.795473	-1.00925	0.166195	0.221635	-0.07031	0.504413	0.732747	0	0.0457356	0.406443
AFP	AFP_174_4_1	CTGCTGCAGCCAAAGTGAAG	1.17835	0.232816	0.193076	-0.0418687	0.38883	0.504413	0.732747	0	0.0457356	0.406443
AFP	AFP_174_1_1	ACTAGCAACCATGAAGTGGG	0.587729	0.809099	0.0587234	0.750469	0.117572	0.504413	0.732747	0	0.0457356	0.406443
AFP	AFP_174_7_1	CCAGAAACTAGTCCTGGATG	-0.498034	0.193138	0.36413	-0.0794144	0.604282	0.504413	0.732747	0	0.0457356	0.406443
AGPAT6	AGPAT6_137964_3_4	AAGCTGGTGGTTCTTCTCCT	-1.2117	0.608369	0.471706	0.333743	-0.0112268	19.9817	27.5234	8.07273	32.9976	17.2767
AGPAT6	AGPAT6_137964_2_52	GTAGAGTTTGCGGATACCAA	-1.2554	-1.42314	-0.237924	-0.427564	-0.41242	19.9817	27.5234	8.07273	32.9976	17.2767
AGPAT6	AGPAT6_137964_2_50	GAGGGTGAAGAGGACAGTCA	0.96874	0.243406	0.0582342	0.65488	0.139389	19.9817	27.5234	8.07273	32.9976	17.2767
AGPAT6	AGPAT6_137964_3_3	GGCTCCTCGCTCCATTCTCA	0.096092	-0.137845	0.222365	0.807477	-0.205332	19.9817	27.5234	8.07273	32.9976	17.2767
AGPAT6	AGPAT6_137964_2_47	AGGCAGCAACAGGAACATGG	-0.477269	0.580856	0.233147	-0.0401672	0.778505	19.9817	27.5234	8.07273	32.9976	17.2767
AGPAT6	AGPAT6_137964_4_1	TCGTCGAAGTGGTAGTAGTA	-0.795919	-0.455574	-0.558444	0.0328072	-1.09003	19.9817	27.5234	8.07273	32.9976	17.2767
AGPAT6	AGPAT6_137964_4_8	TGAGCCGAAGGCTGATGTAC	-0.708763	0.531314	-0.163213	0.464192	-0.441075	19.9817	27.5234	8.07273	32.9976	17.2767
AGPAT6	AGPAT6_137964_3_2	GAGAATGGAGCGAGGAGCCA	1.59675	0.844118	0.588818	1.52429	1.63558	19.9817	27.5234	8.07273	32.9976	17.2767
AGPAT6	AGPAT6_137964_4_4	ACTTCCAGTACATCAGCCTT	1.21004	0.639977	1.05811	1.94002	1.14181	19.9817	27.5234	8.07273	32.9976	17.2767
AGPAT6	AGPAT6_137964_4_5	GCCTTCGGCTCACGGTCCTG	0.316546	-0.499587	-0.486635	0.534983	0.617977	19.9817	27.5234	8.07273	32.9976	17.2767
AGPAT6	AGPAT6_137964_2_46	CATGGTGGAAGATCCAGGCC	0.917355	0.562227	0.349719	0.736407	1.54422	19.9817	27.5234	8.07273	32.9976	17.2767
AGPAT6	AGPAT6_137964_3_6	CCCATCTTACCGTTGGTGTA	0.193661	0.479433	-0.0174357	0.178566	0.513851	19.9817	27.5234	8.07273	32.9976	17.2767
AGPAT6	AGPAT6_137964_4_9	CCCACAGGACCGTGAGCCGA	0.627263	0.457065	0.585947	0.694567	0.0731188	19.9817	27.5234	8.07273	32.9976	17.2767
AGPAT6	AGPAT6_137964_2_27	TAGCCTGATTGTCAACCTTC	0.87623	0.0420134	0.369903	0.0548269	1.14984	19.9817	27.5234	8.07273	32.9976	17.2767
AGPAT6	AGPAT6_137964_3_5	TGTAGGGCTTGTAAAGCTGG	-0.906296	-0.781497	-0.249031	-0.491355	0.328005	19.9817	27.5234	8.07273	32.9976	17.2767
AGPAT6	AGPAT6_137964_4_10	CAGGCCCTGCCTCACCTGAG	-0.25022	0.361861	-1.13145	-0.139247	0.203057	19.9817	27.5234	8.07273	32.9976	17.2767
AGPAT6	AGPAT6_137964_5_1	AGGATAGCACTGGCTTTCAC	0.101104	0.688376	-0.0918977	-0.00994886	0.668801	19.9817	27.5234	8.07273	32.9976	17.2767
AGPAT6	AGPAT6_137964_2_51	AAACGAGAAGGAGGGTGAAG	0.491738	0.201148	-0.607505	0.285541	0.208894	19.9817	27.5234	8.07273	32.9976	17.2767
AGPAT6	AGPAT6_137964_3_1	CCAGTGGGCTACCTTGAGAA	0.530348	0.43802	-0.198186	0.909429	0.558421	19.9817	27.5234	8.07273	32.9976	17.2767
AGPAT6	AGPAT6_137964_2_48	TGCCCAGAAGGTTGACAATC	0.163149	0.228613	-0.253673	-0.299936	0.479822	19.9817	27.5234	8.07273	32.9976	17.2767
AGRP	AGRP_181_4_5	AGCAGAAGGCATTGAAGAAG	-0.245201	-0.325919	2.57107	-0.365583	2.00508	0	0.055692	0.0269619	0.0577648	0
AGRP	AGRP_181_2_9	CTGGCACTGCCTGCCACGCG	-0.56031	0.319487	0.137173	-1.07294	0.733082	0	0.055692	0.0269619	0.0577648	0
AGRP	AGRP_181_2_4	GCCCATCTGGGCTCCTCGCG	-0.893961	-0.242756	-0.427015	-0.199941	-0.00849451	0	0.055692	0.0269619	0.0577648	0
AGRP	AGRP_181_4_15	GCTCCTCACGTCGCTGCGTA	0.166505	0.590656	0.123063	-0.445282	1.23632	0	0.055692	0.0269619	0.0577648	0
AGRP	AGRP_181_4_6	GAAGAAGCGGCAGTAGCACG	-1.1571	1.4528	1.42317	1.24735	1.20398	0	0.055692	0.0269619	0.0577648	0
AGRP	AGRP_181_2_6	GGCACAGCTCAGCACCGCTG	-0.992556	-0.606123	-1.16523	-1.04128	0.668892	0	0.055692	0.0269619	0.0577648	0
AGRP	AGRP_181_3_4	AACTGCAGAACAGGCAGAAG	-0.365951	-0.0797965	-0.394409	0.262842	0.602158	0	0.055692	0.0269619	0.0577648	0
AGRP	AGRP_181_4_7	GTGGCACATGGGTCACAGCA	-0.0811712	-0.660812	-0.762244	-0.208466	-0.204345	0	0.055692	0.0269619	0.0577648	0
AGRP	AGRP_181_2_2	TCTGGGAGCAGGGCCTGGTC	-0.236351	0.263022	-0.952196	-0.813395	-0.499401	0	0.055692	0.0269619	0.0577648	0
AGRP	AGRP_181_4_9	CAGCCTTACGCAGCGACGTG	1.08833	1.22845	0.661133	0.597801	0.0204595	0	0.055692	0.0269619	0.0577648	0
AGRP	AGRP_181_2_3	AGGCCTTCTGATGCCCTCCA	-0.519277	0.151693	0.490478	0.231484	0.218439	0	0.055692	0.0269619	0.0577648	0
AGRP	AGRP_181_4_8	AGCAAGGCACCTGCTGTCCC	-1.28002	-0.514502	-1.07257	-0.775798	-0.00796572	0	0.055692	0.0269619	0.0577648	0
AGRP	AGRP_181_3_3	AGAAGAGGATCTGTTGCAGG	0.572295	0.962632	0.62024	0.0860985	0.00998603	0	0.055692	0.0269619	0.0577648	0
AGRP	AGRP_181_2_11	CCAGGCCATGCTGACCGCAG	-0.64624	-0.618825	-0.0774993	0.0164289	-0.431602	0	0.055692	0.0269619	0.0577648	0
AGRP	AGRP_181_3_2	GTTGCAGGAGGCTCAGGCCT	0.348498	-0.199843	1.16987	-0.32114	0.331486	0	0.055692	0.0269619	0.0577648	0
AGRP	AGRP_181_2_8	GCGAGGAGCCCAGATGGGCT	0.0150775	0.119838	-0.350086	-1.24866	-0.592633	0	0.055692	0.0269619	0.0577648	0
AGRP	AGRP_181_4_13	TTCTGCTACTGCCGCAAGCT	1.40195	0.0141069	0.715814	0.456067	0.124288	0	0.055692	0.0269619	0.0577648	0
AGRP	AGRP_181_4_14	TGAGTCCTGCCTGGGACAGC	-0.137738	-0.0636082	0.147875	0.0457234	0.179711	0	0.055692	0.0269619	0.0577648	0
AGRP	AGRP_181_4_16	CCTGCAGGTACTAGACCTGC	0.732505	0.34192	0.0895357	-0.289763	0.116012	0	0.055692	0.0269619	0.0577648	0
AGTR1	AGTR1_185_5_11	GCTGTGTAGACAGCCCATAG	-1.06071	-0.165831	0.0532407	0.155689	-0.227256	0	0.0159515	0	0	8.21874
AGTR1	AGTR1_185_5_12	GGTAATTGCCAAAGGGCCAG	0.296472	-0.0273233	-0.480209	-0.495407	-0.665501	0	0.0159515	0	0	8.21874
AGTR1	AGTR1_185_3_3	CCTCTGAGCTGTGGAGCCTT	0.427606	0.261037	0.347116	1.0462	0.272854	0	0.0159515	0	0	8.21874
AGTR1	AGTR1_185_4_7	GCTAGGTGGGCAGTGGTGCT	-1.07309	0.304209	-0.0604807	-0.551869	-1.74518	0	0.0159515	0	0	8.21874
AGTR1	AGTR1_185_4_5	GGCTGAGCATTCTCTTGCAA	-0.38158	0.363504	-0.299219	0.183658	-0.541402	0	0.0159515	0	0	8.21874
AGTR1	AGTR1_185_4_9	GTCAGCATTGGGCACAGGCC	0.755566	0.338824	0.775167	0.0243094	0.677602	0	0.0159515	0	0	8.21874
AGTR1	AGTR1_185_4_12	GAGAGTGACATCACCGAATG	1.62827	0.712414	1.31245	1.28723	0.899259	0	0.0159515	0	0	8.21874
AGTR1	AGTR1_185_5_1	GTTTGCAACAAATTCGACCC	-0.682626	-0.700537	-0.752334	-0.168684	-0.0576758	0	0.0159515	0	0	8.21874
AGTR1	AGTR1_185_4_11	ACAGCCACACTCTGAGGTGA	1.82499	1.58438	1.56	1.02379	1.00764	0	0.0159515	0	0	8.21874
AGTR1	AGTR1_185_5_4	ACACAGCTATGGAATACCGC	0.844467	-0.282621	0.0225221	-0.250569	0.261619	0	0.0159515	0	0	8.21874
AGTR1	AGTR1_185_5_3	ATGGGCTGTCTACACAGCTA	-0.204435	-0.160926	0.341507	0.218404	-0.238532	0	0.0159515	0	0	8.21874
AGTR1	AGTR1_185_3_1	CAAGTCAACTGACAGTCCAA	-0.514946	-0.679184	-0.115333	0.399566	-0.412455	0	0.0159515	0	0	8.21874
AGTR1	AGTR1_185_4_6	CCTATTGCTCTACCAGGAGC	0.648366	0.483973	0.325954	0.470842	-0.33467	0	0.0159515	0	0	8.21874
AGTR1	AGTR1_185_4_10	CTGAGGTGAAGGTCAGCATT	-0.231003	-0.440569	-1.06677	-0.00476072	-0.626992	0	0.0159515	0	0	8.21874
AGTR1	AGTR1_185_3_2	CCAAAGGCTCCACAGCTCAG	0.619781	0.66478	0.748677	0.271803	0.718325	0	0.0159515	0	0	8.21874
AGTR1	AGTR1_185_4_4	CTGACCTTCACCTCAGAGTG	1.04416	1.44183	0.381647	0.993028	0.641253	0	0.0159515	0	0	8.21874
AGTR1	AGTR1_185_5_10	CAGCTTTGGGACAATCATCT	0.764863	0.835104	0.425259	0.738299	0.100135	0	0.0159515	0	0	8.21874
AGTR1	AGTR1_185_4_2	CCTGCTCCTGGTAGAGCAAT	0.308775	0.159919	-0.154355	-0.228914	0.076667	0	0.0159515	0	0	8.21874
AGTR1	AGTR1_185_5_2	CAAGATGATTGTCCCAAAGC	0.359786	-0.373549	-0.165561	-0.480918	-2.00974	0	0.0159515	0	0	8.21874
AGTR1	AGTR1_185_4_1	AATGCTCAGCCATGTTCATC	1.44427	0.0353379	0.863894	0.933791	1.23789	0	0.0159515	0	0	8.21874
AHCTF1	AHCTF1_sgAHCTF1_1	GGCGGCACATGGCGGCGGAG	-0.34808	0.622999	-0.0272683	-0.71635	0.220227	25.4804	13.2286	11.6705	9.96512	7.29733
AHCTF1	AHCTF1_sgAHCTF1_9	CTGTTCAGTCTACACAAGAT	-0.569173	-2.71386	-3.29548	-1.58664	-1.84577	25.4804	13.2286	11.6705	9.96512	7.29733
AHCTF1	AHCTF1_sgAHCTF1_4	GAGAAAGTGTAATGAGACAA	-3.1491	-2.4509	-3.12795	-3.46811	-2.4201	25.4804	13.2286	11.6705	9.96512	7.29733
AHCTF1	AHCTF1_25909_33_22	AAGAAGCTCCCAGCATTAGA	-1.61121	-1.49047	-2.38055	-0.709095	-0.791053	25.4804	13.2286	11.6705	9.96512	7.29733
AHCTF1	AHCTF1_sgAHCTF1_7	AAGAACCTGAGAATGATCCT	-0.714175	-1.59393	-1.63596	-2.05424	-1.31852	25.4804	13.2286	11.6705	9.96512	7.29733
AHCTF1	AHCTF1_25909_33_3	TAGACCGAGTCCTGCTGCTG	-0.162898	0.181436	-0.531204	-0.0217899	-0.0555139	25.4804	13.2286	11.6705	9.96512	7.29733
AHCTF1	AHCTF1_sgAHCTF1_8	TCGGAATTGCTGTTACTTGT	-2.68196	-3.16279	-3.03437	-2.17983	-2.65634	25.4804	13.2286	11.6705	9.96512	7.29733
AHCTF1	AHCTF1_25909_18_6	TCCCTGATTGCAGAGGGAAG	-1.51317	-1.88437	-2.47784	-0.951594	-1.53861	25.4804	13.2286	11.6705	9.96512	7.29733
AHCTF1	AHCTF1_25909_22_4	TCAGGTGTATGGTTGAAGCC	-0.13567	0.88359	-0.812736	-0.366765	-0.415904	25.4804	13.2286	11.6705	9.96512	7.29733
AHCTF1	AHCTF1_25909_18_1	CCTACATGCAGACTAGCAGG	-2.06161	-2.11982	-2.25896	-1.19971	-1.86219	25.4804	13.2286	11.6705	9.96512	7.29733
AHCTF1	AHCTF1_sgAHCTF1_6	TTTCAGATATTACATACAAT	0.272399	0.118443	-0.895953	0.629539	0.676637	25.4804	13.2286	11.6705	9.96512	7.29733
AHCTF1	AHCTF1_25909_6_1	CACAAGTAACAGCAATTCCG	-2.3007	-2.28145	-3.87515	-2.46349	-1.75308	25.4804	13.2286	11.6705	9.96512	7.29733
AHCTF1	AHCTF1_sgAHCTF1_2	TAAACAGTACCTACCCTTCC	-1.76678	-3.21008	-3.4577	-4.98285	-2.20749	25.4804	13.2286	11.6705	9.96512	7.29733
AHCTF1	AHCTF1_25909_6_3	CTCGGAATTGCTGTTACTTG	-0.259808	-0.363024	-0.0821176	0.967598	0.763058	25.4804	13.2286	11.6705	9.96512	7.29733
AHCTF1	AHCTF1_25909_12_1	CTCACTTGGCTTAAACTGGA	-0.539941	-0.988605	-1.07905	-0.290017	0.0807894	25.4804	13.2286	11.6705	9.96512	7.29733
AHCTF1	AHCTF1_25909_33_19	CAGCAGGACTCGGTCTAGCA	1.05733	0.872077	0.137563	0.826261	1.047	25.4804	13.2286	11.6705	9.96512	7.29733
AHCTF1	AHCTF1_sgAHCTF1_5	AGGACAAATCAGCTTGCTGT	-1.69299	-2.84312	-2.55202	-2.20641	-1.50878	25.4804	13.2286	11.6705	9.96512	7.29733
AHCTF1	AHCTF1_25909_23_5	ATGATTCTGAACGCTGGCAC	-0.605267	-0.11049	-0.403858	0.209227	0.312342	25.4804	13.2286	11.6705	9.96512	7.29733
AHCTF1	AHCTF1_sgAHCTF1_3	CCAAACATAGGTCAACAAGA	-2.60967	-3.39342	-4.08513	-2.39405	-2.17783	25.4804	13.2286	11.6705	9.96512	7.29733
AHCTF1	AHCTF1_sgAHCTF1_10	ATCAGGACAAATCTTATATG	-1.77445	-2.57559	-2.932	-3.60707	-1.90744	25.4804	13.2286	11.6705	9.96512	7.29733
AHI1	AHI1_54806_9_3	GCTTGATGATGACCTTGTCT	-0.430795	-0.241323	0.0528396	1.42778	0.54352	4.77292	4.27542	4.38648	11.7085	1.56972
AHI1	AHI1_54806_9_4	AATAACAAGCCGAGATAGCC	1.46099	0.926715	2.05344	0.55328	1.62045	4.77292	4.27542	4.38648	11.7085	1.56972
AHI1	AHI1_54806_7_7	GACTACACAAGACCTGAAAC	0.645022	1.22044	0.553709	0.894438	0.48366	4.77292	4.27542	4.38648	11.7085	1.56972
AHI1	AHI1_54806_12_1	GGGATCGAGGCTTAGTAGGT	-0.377575	-1.13273	-1.23086	-0.203787	-0.503881	4.77292	4.27542	4.38648	11.7085	1.56972
AHI1	AHI1_54806_12_2	TTTAAGCTTCTGGGAGCCAA	1.42524	0.79744	1.36917	0.84227	0.812471	4.77292	4.27542	4.38648	11.7085	1.56972
AHI1	AHI1_54806_7_3	TCAGGTCTTGTGTAGTCAAC	0.243921	-0.147071	-1.19593	-0.939415	0.711395	4.77292	4.27542	4.38648	11.7085	1.56972
AHI1	AHI1_54806_13_7	GCCATCTTACCGCTCTATGA	0.221698	-0.0770743	-0.264152	0.509196	0.174615	4.77292	4.27542	4.38648	11.7085	1.56972
AHI1	AHI1_54806_9_1	TGGGATAAACCGGGCTATCT	-0.198958	0.253613	0.604827	0.744745	0.442553	4.77292	4.27542	4.38648	11.7085	1.56972
AHI1	AHI1_54806_7_2	TCTCAGGAGTTTCCGGTTTC	0.157601	0.994684	0.563022	0.5033	0.691469	4.77292	4.27542	4.38648	11.7085	1.56972
AHI1	AHI1_54806_7_6	ACCGGAAACTCCTGAGAATA	1.44736	1.24861	1.04892	0.372379	-0.481641	4.77292	4.27542	4.38648	11.7085	1.56972
AHI1	AHI1_54806_7_5	ACACATACAAAGCCACAGCC	1.51206	0.506949	1.6109	1.04322	0.94934	4.77292	4.27542	4.38648	11.7085	1.56972
AHI1	AHI1_54806_8_1	TTCAACTGTGTCACCAGAGA	1.21216	0.755814	1.05918	0.626173	0.425072	4.77292	4.27542	4.38648	11.7085	1.56972
AHI1	AHI1_54806_10_1	ATCAGAGCCTCGAAGCAAAT	0.846651	0.90629	0.96233	0.444799	1.38497	4.77292	4.27542	4.38648	11.7085	1.56972
AHI1	AHI1_54806_13_2	TGGTGACGTTCACAATGCAC	0.175832	-0.117564	-0.999426	-0.650298	-0.469428	4.77292	4.27542	4.38648	11.7085	1.56972
AHI1	AHI1_54806_4_1	CATCTCTCAGCTTTATGCAG	0.36202	0.579853	-0.147871	0.299991	-0.680275	4.77292	4.27542	4.38648	11.7085	1.56972
AHI1	AHI1_54806_9_2	CATGTGGTTGATGAGCATAC	-1.312	-0.801586	-0.419046	-0.228914	-0.139593	4.77292	4.27542	4.38648	11.7085	1.56972
AHI1	AHI1_54806_8_2	ATCTCTGGTGACACAGTTGA	0.216712	0.661867	-0.18549	-0.34868	0.0881615	4.77292	4.27542	4.38648	11.7085	1.56972
AHI1	AHI1_54806_7_1	TGATGATCAACGCCTGGCTG	1.03633	1.40237	1.40273	0.505363	0.642277	4.77292	4.27542	4.38648	11.7085	1.56972
AHR	AHR_sgAHR_4	CGGCTTCCGCCGCTTGCGAC	-1.01138	-1.13633	0.277375	-1.68927	-0.579102	4.83781	4.30649	67.6333	0.070199	2.82276
AHR	AHR_196_6_1	GGTGCTTCATATGTCGTCTA	-0.811206	-0.300351	0.110005	-0.379086	-0.614998	4.83781	4.30649	67.6333	0.070199	2.82276
AHR	AHR_196_7_3	GTCCGGATTTCAAGTATGGA	-0.106103	1.30353	0.786168	0.713051	1.16671	4.83781	4.30649	67.6333	0.070199	2.82276
AHR	AHR_196_5_1	AATTTCAGCGTCAGCTACAC	-0.549174	-0.460362	-0.147838	-0.414015	-0.37619	4.83781	4.30649	67.6333	0.070199	2.82276
AHR	AHR_sgAHR_2	GCGACTGGCGTAGGTGATGT	0.635566	0.410756	-0.378309	0.0387725	0.625215	4.83781	4.30649	67.6333	0.070199	2.82276
AHR	AHR_sgAHR_1	GTTGGCGCTGCTGCTGTTCA	1.00266	1.02385	0.852217	-0.475431	1.4727	4.83781	4.30649	67.6333	0.070199	2.82276
AHR	AHR_sgAHR_9	CGGTCTCTATGCCGCTTGGA	0.354529	0.416173	0.346355	-0.28785	0.0814431	4.83781	4.30649	67.6333	0.070199	2.82276
AHR	AHR_196_5_4	GCTGACGCTGAAATTCAGCT	0.355412	0.842991	0.534497	0.390668	0.973459	4.83781	4.30649	67.6333	0.070199	2.82276
AHR	AHR_196_2_6	CAAAGAAGCTCTTGGCTCTC	0.622919	0.952275	0.861123	0.0593617	0.358266	4.83781	4.30649	67.6333	0.070199	2.82276
AHR	AHR_sgAHR_7	TTGACTTGATTCCTTCAGCT	0.00741132	1.10215	0.911805	0.0401226	0.740748	4.83781	4.30649	67.6333	0.070199	2.82276
AHR	AHR_196_8_2	CTTACTTCGGATATGGGACT	-0.754841	0.380805	0.523543	0.719157	0.0971425	4.83781	4.30649	67.6333	0.070199	2.82276
AHR	AHR_sgAHR_5	GTAAAGCCAATCCCAGCTGA	-0.810491	0.897618	0.950036	0.663722	1.24184	4.83781	4.30649	67.6333	0.070199	2.82276
AHR	AHR_196_1_43	TCATGGTGCCCAGCCGACGG	0.281675	1.09393	-0.708706	-0.551796	-1.28991	4.83781	4.30649	67.6333	0.070199	2.82276
AHR	AHR_sgAHR_8	TCAAGTCAAATCCTTCCAAG	-1.55493	0.0697282	-0.144766	0.157854	-0.083116	4.83781	4.30649	67.6333	0.070199	2.82276
AHR	AHR_196_3_4	TTGCTGCTCTACAGTTATCC	-0.146074	0.551151	0.577115	0.0225092	1.34684	4.83781	4.30649	67.6333	0.070199	2.82276
AHR	AHR_196_9_1	TAGACTGGACCCAAGTCCAT	-1.34581	-0.0653211	-1.39669	-0.704905	0.270188	4.83781	4.30649	67.6333	0.070199	2.82276
AHR	AHR_sgAHR_3	TCACCTACGCCAGTCGCAAG	-0.384939	0.371697	0.492126	0.559066	0.334138	4.83781	4.30649	67.6333	0.070199	2.82276
AHR	AHR_sgAHR_10	AGACCGACTTAATACAGAGT	1.2875	1.2011	0.797089	-0.27386	0.908982	4.83781	4.30649	67.6333	0.070199	2.82276
AHR	AHR_sgAHR_6	TTGATTCCTTCAGCTGGGAT	0.449725	0.974489	1.26119	0.713526	0.928055	4.83781	4.30649	67.6333	0.070199	2.82276
AHRR	AHRR_sgAHRR_3	GGGAGTGCACGTACGCGGGC	-0.783498	1.16203	-0.806464	-0.2791	-0.989147	0.953632	0	0	0.71259	4.74495
AHRR	AHRR_57491_3_4	GGTCCCGGTGTCGCTTGGAG	0.574828	-0.0890298	-0.164269	-0.866318	-1.38687	0.953632	0	0	0.71259	4.74495
AHRR	AHRR_sgAHRR_6	GATACTTTACTGTTTCTGCA	0.75574	0.981939	0.686531	1.42506	0.723807	0.953632	0	0	0.71259	4.74495
AHRR	AHRR_57491_4_4	TCTTGCAGGGTCTGCCGTGC	-0.437973	-0.873979	-0.795996	-1.8354	-1.6977	0.953632	0	0	0.71259	4.74495
AHRR	AHRR_57491_2_1	GCCGAGGACGATGATCCCGC	0.355923	1.77524	1.04453	0.445994	-0.737982	0.953632	0	0	0.71259	4.74495
AHRR	AHRR_sgAHRR_4	GCACGTACGCGGGCCGGAAG	0.451716	-0.119045	-0.693481	0.104968	-0.711016	0.953632	0	0	0.71259	4.74495
AHRR	AHRR_57491_3_12	GGAAGAAGCTCTTCACCCGG	-1.00279	0.0234612	0.135392	-0.379053	-0.376756	0.953632	0	0	0.71259	4.74495
AHRR	AHRR_57491_6_2	ACGACCGCCAGGACTTCTGC	1.15903	1.83037	1.4992	0.669561	0.220896	0.953632	0	0	0.71259	4.74495
AHRR	AHRR_sgAHRR_9	GGTCCAACTCGGCGTTGAGG	-0.137871	-0.290219	0.0539273	-0.96351	-1.29456	0.953632	0	0	0.71259	4.74495
AHRR	AHRR_57491_6_4	AGTCCTGGCGGTCGTCCACG	-0.553413	0.191863	-0.309145	0.595865	0.861978	0.953632	0	0	0.71259	4.74495
AHRR	AHRR_57491_4_7	AGCACGGCAGACCCTGCAAG	1.19171	0.542095	0.181791	1.21303	-0.548336	0.953632	0	0	0.71259	4.74495
AHRR	AHRR_57491_6_1	CATCCACGTGGACGACCGCC	1.7852	1.51409	1.39974	1.56685	1.1527	0.953632	0	0	0.71259	4.74495
AHRR	AHRR_sgAHRR_1	CGGGATCATCGTCCTCGGCC	1.43995	1.28146	1.28368	0.798874	0.652159	0.953632	0	0	0.71259	4.74495
AHRR	AHRR_sgAHRR_2	CCGAGGACGATGATCCCGCC	0.864743	0.664191	0.703775	0.439096	1.26742	0.953632	0	0	0.71259	4.74495
AHRR	AHRR_sgAHRR_7	CGGTCCCGGTGTCGCTTGGA	0.0494502	0.596044	-0.206856	0.216645	0.0926007	0.953632	0	0	0.71259	4.74495
AHRR	AHRR_sgAHRR_5	ACGCGGGCCGGAAGCGGAGG	-0.291851	-0.506789	0.283346	0.736812	-0.583398	0.953632	0	0	0.71259	4.74495
AHRR	AHRR_57491_5_3	TTATGCATCAGCAACGATCG	0.0673673	0.303816	0.65046	-0.0686562	0.490318	0.953632	0	0	0.71259	4.74495
AHRR	AHRR_sgAHRR_10	CAACGCCGAGTTGGACCACC	1.15596	1.56547	1.27767	1.30504	1.31419	0.953632	0	0	0.71259	4.74495
AICDA	AICDA_57379_3_15	GCGTCACCTGGTTCACCTCC	0.924654	-0.700024	0.296475	0.106434	-1.11897	0	0.00672504	0	0	0
AICDA	AICDA_57379_3_16	GCCGCTGCTACCGCGTCACC	-0.133171	0.0983079	0.372687	0.416722	0.501989	0	0.00672504	0	0	0
AICDA	AICDA_57379_3_9	GGTCCCAGTCCGAGATGTAG	-0.533199	-0.231191	0.992696	0.147005	0.217597	0	0.00672504	0	0	0
AICDA	AICDA_57379_2_1	GCCTCTTCACTACGTAGCAC	-0.69758	-0.607994	0.276217	-0.301773	0.48791	0	0.00672504	0	0	0
AICDA	AICDA_57379_3_10	GGAGGAAGAGCAATTCCACG	-0.0197256	1.36307	0.890248	-0.308784	0.541426	0	0.00672504	0	0	0
AICDA	AICDA_57379_3_13	ATGTGGCCGACTTTCTGCGA	0.727994	0.525898	0.277631	0.403194	0.290143	0	0.00672504	0	0	0
AICDA	AICDA_57379_2_5	ACAGCCTCTTGATGAACCGG	0.466518	1.18888	1.02426	0.65322	0.635401	0	0.00672504	0	0	0
AICDA	AICDA_57379_3_5	GCAGAAAGTCGGCCACATGT	0.685931	-0.15178	0.272569	0.225011	-0.210809	0	0.00672504	0	0	0
AICDA	AICDA_57379_3_7	AGGAGGTGAACCAGGTGACG	-0.487819	0.622213	-1.04816	-0.815959	0.0836005	0	0.00672504	0	0	0
AICDA	AICDA_57379_2_3	ACCTGTGCTACGTAGTGAAG	0.952886	0.600582	0.0850065	0.557441	0.377474	0	0.00672504	0	0	0
AICDA	AICDA_57379_3_8	GTGACGCGGTAGCAGCGGCC	0.805763	0.839056	0.163545	1.51242	1.11022	0	0.00672504	0	0	0
AICDA	AICDA_57379_1_2	AGACACTCTGGACACCACTA	0.626285	1.17129	0.677449	0.928166	0.717337	0	0.00672504	0	0	0
AICDA	AICDA_57379_2_4	ATGTCCGCTGGGCTAAGGGT	0.427341	-0.185431	-0.127371	0.137723	-0.396789	0	0.00672504	0	0	0
AICDA	AICDA_57379_2_2	CACGCCGACCCTTAGCCCAG	0.517878	0.593515	-0.0346746	0.0716444	-0.195149	0	0.00672504	0	0	0
AICDA	AICDA_57379_3_14	CTACGACTGTGCCCGACATG	1.19965	0.925099	0.584697	0.526313	0.715933	0	0.00672504	0	0	0
AICDA	AICDA_57379_3_6	ATGTCGGGCACAGTCGTAGC	0.260418	0.0363488	-0.119151	-0.543047	0.0899961	0	0.00672504	0	0	0
AICDA	AICDA_57379_3_18	CCTCCGCTACATCTCGGACT	1.35926	1.1369	0.813843	0.717116	0.588415	0	0.00672504	0	0	0
AICDA	AICDA_57379_3_19	TCTCCAGAACGGCTGCCACG	0.775553	0.328056	0.759425	0.201228	0.509164	0	0.00672504	0	0	0
AICDA	AICDA_57379_3_4	CGGTGAAGATCCTCAGACTG	0.817734	0.713135	0.845996	0.334383	1.28305	0	0.00672504	0	0	0
AICDA	AICDA_57379_3_17	TCGGACTGGGACCTAGACCC	0.475845	0.0236057	-0.155456	0.333068	-0.0741249	0	0.00672504	0	0	0
AIRE	AIRE_sgAIRE_1	AGCGCCGCGTCCGTCGCCAT	-0.428889	-0.494616	1.1706	-1.30569	-0.346413	0	0	0	0	0
AIRE	AIRE_sgAIRE_4	TGCGGTGCAGCCTCAGAAGC	0.137367	0.155012	-0.842362	0.524041	0.350075	0	0	0	0	0
AIRE	AIRE_sgAIRE_6	CGGCCACCGCGATCTCCGTG	-0.409773	0.241149	0.742281	0.333796	0.680976	0	0	0	0	0
AIRE	AIRE_326_2_7	GCTGTTCAAGGACTACAACC	0.996189	0.317183	1.3231	1.86414	-0.344634	0	0	0	0	0
AIRE	AIRE_326_2_8	GACTACAACCTGGAGCGCTA	0.926892	0.694464	0.574724	0.924311	-0.173581	0	0	0	0	0
AIRE	AIRE_sgAIRE_8	CAGCGCGTGCAGCAGTGGGA	-0.275971	0.30691	0.106655	0.729882	-0.379451	0	0	0	0	0
AIRE	AIRE_sgAIRE_2	CGACGGACGCGGCGCTACGC	-0.403008	1.13677	-0.425929	-0.588537	-0.452096	0	0	0	0	0
AIRE	AIRE_326_1_6	CTTCCCACTGCTGCACGCGC	-0.617972	-0.263401	-0.122327	-0.50507	-0.290396	0	0	0	0	0
AIRE	AIRE_326_3_4	GTGGCGGTACCAAAGCCTTG	0.122241	0.683599	0.711225	-0.209594	0.593357	0	0	0	0	0
AIRE	AIRE_sgAIRE_5	GCTGCACCGCACGGAGATCG	1.04752	0.220545	0.839016	0.23343	0.613047	0	0	0	0	0
AIRE	AIRE_326_2_15	GCAGCCGGCCATAGCGCTCC	0.479161	0.124022	-0.0699691	0.418442	-0.730974	0	0	0	0	0
AIRE	AIRE_sgAIRE_3	CGGCGCTACGCCGGCTTCTG	0.485748	-0.376518	0.905532	-0.219866	-0.633492	0	0	0	0	0
AIRE	AIRE_326_1_5	GCACCGCACGGAGATCGCGG	0.142987	0.51113	0.00876952	0.387395	-0.0747802	0	0	0	0	0
AIRE	AIRE_sgAIRE_10	CGCGCTGGCTGACCACGACG	1.61915	0.219792	0.941489	0.989137	1.00346	0	0	0	0	0
AIRE	AIRE_326_6_8	GCCAACCTGGATGCACTTCT	1.13093	1.1319	1.21581	0.192374	0.708371	0	0	0	0	0
AIRE	AIRE_326_6_12	TGGCTCGAACCAGAGGCTTC	0.803967	1.31689	0.677777	0.211623	1.24346	0	0	0	0	0
AIRE	AIRE_sgAIRE_7	CAGTGGGAAGGCGCTGTCCA	-0.36758	0.0823568	0.544949	0.157017	-0.165758	0	0	0	0	0
AIRE	AIRE_sgAIRE_9	TCAGCCAGCGCGTGCAGCAG	0.746256	0.269566	-0.133179	-0.107775	-0.169318	0	0	0	0	0
AK5	AK5_26289_2_21	CGCGGTCTGCAGCCCACCCT	-0.114791	-0.315413	0.0275168	-0.111077	-1.04627	0.010271	0.939855	0.419715	0.016864	5.50759
AK5	AK5_26289_3_3	CACTAAATGGAGGACAGTCA	-0.356136	0.160226	0.454576	0.434736	1.02067	0.010271	0.939855	0.419715	0.016864	5.50759
AK5	AK5_26289_2_11	CCAGTGCTCGACAACCCACC	0.687683	0.851785	1.20162	0.502443	1.46655	0.010271	0.939855	0.419715	0.016864	5.50759
AK5	AK5_26289_4_3	AGCCGGTCATACCGCCGATA	-0.916233	-0.401627	-1.28727	-1.45135	-1.14761	0.010271	0.939855	0.419715	0.016864	5.50759
AK5	AK5_26289_4_1	TTCCATATCGGCGGTATGAC	-0.19368	-0.919455	-0.137434	0.217449	-0.516418	0.010271	0.939855	0.419715	0.016864	5.50759
AK5	AK5_26289_2_23	TCGAGTCTTTACTCGCTGCT	0.789883	0.410119	0.996773	0.0126121	0.324374	0.010271	0.939855	0.419715	0.016864	5.50759
AK5	AK5_26289_6_1	ATTTCCAAGAGATGTTGCCC	0.18573	-0.834753	0.280999	0.400215	-0.0653562	0.010271	0.939855	0.419715	0.016864	5.50759
AK5	AK5_26289_4_5	GAGATCCGTGTCACTTTCTA	0.394408	0.0360468	0.41661	0.302504	0.193441	0.010271	0.939855	0.419715	0.016864	5.50759
AK5	AK5_26289_7_2	CAAGCAGAATGCTGCTCCAT	-1.66428	-1.18553	-0.110728	-0.0670074	-0.206297	0.010271	0.939855	0.419715	0.016864	5.50759
AK5	AK5_26289_2_5	TCACTCTGCTGGTCGAGGGT	0.610901	-0.37674	-0.117003	-0.444973	-0.803236	0.010271	0.939855	0.419715	0.016864	5.50759
AK5	AK5_26289_2_7	TGGACGAAGGCAGCCCTTCC	0.998904	1.23538	1.00029	1.00919	0.495004	0.010271	0.939855	0.419715	0.016864	5.50759
AK5	AK5_26289_7_1	ACTGAAGCGTGCAGAACAGC	1.51644	0.692374	0.826047	0.832495	1.04685	0.010271	0.939855	0.419715	0.016864	5.50759
AK5	AK5_26289_7_3	CAGGAATACCACCAAATCGG	-0.589578	0.0855146	-0.173892	0.981387	-0.496033	0.010271	0.939855	0.419715	0.016864	5.50759
AK5	AK5_26289_2_3	CGAGTAAAGACTCGAAACTG	-1.16787	-0.318132	-0.292165	-0.661779	-0.126905	0.010271	0.939855	0.419715	0.016864	5.50759
AK5	AK5_26289_1_5	CATGAACACCAACGATGCCA	0.576828	0.723488	0.674821	0.673936	1.66657	0.010271	0.939855	0.419715	0.016864	5.50759
AK5	AK5_26289_1_12	CCTCCGGGCCAGATACTCCT	-0.452173	0.252454	0.355037	0.230556	0.312017	0.010271	0.939855	0.419715	0.016864	5.50759
AK5	AK5_26289_2_10	TCCCGTTGCCTAGGAAGGGT	0.0402834	0.101369	0.00167181	-0.837577	-1.74054	0.010271	0.939855	0.419715	0.016864	5.50759
AK5	AK5_26289_3_2	ACCTTACCTCCACTAAATGG	-0.956795	-0.20133	0.151091	0.0411714	-0.824802	0.010271	0.939855	0.419715	0.016864	5.50759
AK5	AK5_26289_2_31	CCGACCCGCTATCTCCAGGT	-1.35037	-1.61112	-0.905356	-0.109763	-1.02102	0.010271	0.939855	0.419715	0.016864	5.50759
AK5	AK5_26289_2_20	CCTGGGTGTCCACATCCGAG	-0.74269	-0.0118922	0.767583	0.688267	-0.247861	0.010271	0.939855	0.419715	0.016864	5.50759
AKAP1	AKAP1_8165_5_41	GGTTGCAGGTCGTGTGTGTC	-0.573874	-0.981009	-0.238548	-1.2571	-0.322429	25.2566	23.7135	51.1652	22.7386	13.066
AKAP1	AKAP1_8165_5_108	AGTACTTTCTGGCAGTGGCG	-1.73704	-1.04421	-0.436068	-0.871131	-1.60491	25.2566	23.7135	51.1652	22.7386	13.066
AKAP1	AKAP1_8165_5_77	CACGGCATCACCAGTCCCTT	0.454923	0.862982	0.515212	-0.374824	-0.17368	25.2566	23.7135	51.1652	22.7386	13.066
AKAP1	AKAP1_8165_5_38	GATCTCAGAAGCAACCGAAC	0.167021	0.73224	0.377876	-1.09577	0.340226	25.2566	23.7135	51.1652	22.7386	13.066
AKAP1	AKAP1_8165_5_80	GCCGACTCGATGAACCTACT	0.274663	0.602854	0.470525	0.395104	0.87623	25.2566	23.7135	51.1652	22.7386	13.066
AKAP1	AKAP1_8165_5_66	GACTCTGATCTTCGGCAAGG	0.130988	0.941677	0.328316	1.18283	0.908103	25.2566	23.7135	51.1652	22.7386	13.066
AKAP1	AKAP1_8165_5_29	AGTCGCAGACGCCAAAGCCC	-0.125881	0.195172	0.540202	0.018595	0.123489	25.2566	23.7135	51.1652	22.7386	13.066
AKAP1	AKAP1_8165_5_104	AAGCCACCAAAGGGACACTT	-0.402298	0.609296	0.01524	-0.708883	0.52961	25.2566	23.7135	51.1652	22.7386	13.066
AKAP1	AKAP1_8165_5_82	GACACCTCTATCCTGGGCTT	0.732819	0.344851	0.695008	-0.551796	0.577091	25.2566	23.7135	51.1652	22.7386	13.066
AKAP1	AKAP1_8165_5_17	CCCGCAGAGAAGCGTAGCTC	-0.309139	-0.432529	0.00803195	0.625578	1.28315	25.2566	23.7135	51.1652	22.7386	13.066
AKAP1	AKAP1_8165_5_31	AGAGGTGTCGAGGGAGAACT	-1.46992	-0.419698	-0.154603	-1.49439	-0.267635	25.2566	23.7135	51.1652	22.7386	13.066
AKAP1	AKAP1_8165_5_110	ATGATCTGCTTCCGCATCCA	0.410452	1.031	0.591615	0.00688605	0.67379	25.2566	23.7135	51.1652	22.7386	13.066
AKAP1	AKAP1_8165_5_27	CGAGTCGGCTCACACAGAGC	-0.570513	-0.510923	-0.507785	-2.11778	-0.842175	25.2566	23.7135	51.1652	22.7386	13.066
AKAP1	AKAP1_8165_5_11	ACAGACATGAGATTGCGACC	-0.939353	-0.743736	0.112444	-0.859655	-1.15779	25.2566	23.7135	51.1652	22.7386	13.066
AKAP1	AKAP1_8165_5_40	ACCACGGTTGGCAAGGTTGC	-1.04268	0.0930898	-1.07085	-0.669458	-1.52639	25.2566	23.7135	51.1652	22.7386	13.066
AKAP1	AKAP1_8165_5_71	GCACTCTAGAGGAATCGATT	-0.961121	-0.237279	-0.241264	-0.582056	-0.380314	25.2566	23.7135	51.1652	22.7386	13.066
AKAP1	AKAP1_8165_5_63	TGCAGGCAGCTTGCTCACGG	-1.17258	-0.424005	-0.553245	-0.850779	0.003708	25.2566	23.7135	51.1652	22.7386	13.066
AKAP1	AKAP1_8165_5_10	TTGCCGAAGATCAGAGTCCT	1.51442	0.895894	1.14781	0.247718	0.867226	25.2566	23.7135	51.1652	22.7386	13.066
AKAP1	AKAP1_8165_5_45	CTTGCCAGGCCTACCAGCAG	-1.37663	-0.725464	-1.26775	-2.55953	-0.679038	25.2566	23.7135	51.1652	22.7386	13.066
AKAP10	AKAP10_11216_4_9	CGTCTTGAAATGGCCAGAGC	-0.905872	-0.973466	-0.373383	1.2566	-0.748726	11.99	10.1819	15.6371	12.6046	6.14688
AKAP10	AKAP10_11216_3_3	GGCTGTCCTGCTACTTGAAA	0.165847	0.221325	1.07569	0.429347	0.734059	11.99	10.1819	15.6371	12.6046	6.14688
AKAP10	AKAP10_11216_4_6	AATGGGCACTGTCACATTCC	-0.501375	-0.0532732	-0.498099	-0.0136662	0.0124237	11.99	10.1819	15.6371	12.6046	6.14688
AKAP10	AKAP10_11216_3_7	GAAGCAGCCAAGCCACATGG	0.158566	0.868954	0.654629	0.753234	0.817522	11.99	10.1819	15.6371	12.6046	6.14688
AKAP10	AKAP10_11216_3_2	GCTTGGCTGCTTCTTAAGTG	-0.79945	-0.306706	-0.103283	-1.21733	-0.621899	11.99	10.1819	15.6371	12.6046	6.14688
AKAP10	AKAP10_11216_1_9	CCGCCATGTCCTTCTTCCGG	-2.03242	-1.73699	-1.3995	-0.68385	-1.01843	11.99	10.1819	15.6371	12.6046	6.14688
AKAP10	AKAP10_11216_3_4	GGAGTCCATGTTGGCAGAAA	0.409511	0.628663	0.276802	-0.0362397	0.810244	11.99	10.1819	15.6371	12.6046	6.14688
AKAP10	AKAP10_11216_4_12	CACAGTGAAGCAGAGCTCAC	-0.363909	0.503113	0.0737924	0.4404	0.170066	11.99	10.1819	15.6371	12.6046	6.14688
AKAP10	AKAP10_11216_4_10	CCATTCTCTCCGTCTTGAAA	0.157049	0.476586	-0.821278	-0.0224706	-0.668937	11.99	10.1819	15.6371	12.6046	6.14688
AKAP10	AKAP10_11216_4_7	TGTCGTGCAAGACTTGTTCA	-0.764042	-0.34325	-0.0448709	0.616091	-0.506346	11.99	10.1819	15.6371	12.6046	6.14688
AKAP10	AKAP10_11216_3_5	TGGTCCTGCAGCCTCCAGCA	0.15165	0.823026	1.26565	0.813541	1.00332	11.99	10.1819	15.6371	12.6046	6.14688
AKAP10	AKAP10_11216_3_8	CAATGCCATTTCTGCCAACA	0.882582	-0.172281	0.083348	0.539681	0.901108	11.99	10.1819	15.6371	12.6046	6.14688
AKAP10	AKAP10_11216_1_10	CGGGCCGGTTGCTGAATGAG	-0.714833	0.170405	-0.273545	0.353145	-0.59978	11.99	10.1819	15.6371	12.6046	6.14688
AKAP10	AKAP10_11216_1_3	CCCTCATTCAGCAACCGGCC	0.750036	0.386761	0.861724	1.10826	0.568286	11.99	10.1819	15.6371	12.6046	6.14688
AKAP10	AKAP10_11216_4_13	ACTTCGGCGAATGGAGCATT	-0.215528	0.340306	0.23411	0.788495	0.662263	11.99	10.1819	15.6371	12.6046	6.14688
AKAP10	AKAP10_11216_1_1	GCTACCTTTCCGCCGGAAGA	-0.349697	0.120143	-0.602657	-0.0724243	0.642958	11.99	10.1819	15.6371	12.6046	6.14688
AKAP10	AKAP10_11216_3_1	TGAGCGGCCTCCATGTGGCT	-0.106474	-0.174681	0.360648	0.119795	0.251564	11.99	10.1819	15.6371	12.6046	6.14688
AKAP10	AKAP10_11216_3_6	CACATGGAGGCCGCTCATTT	0.981885	0.722915	1.1897	1.58131	1.40734	11.99	10.1819	15.6371	12.6046	6.14688
AKAP10	AKAP10_11216_4_5	CTGCTCTGGCCATTTCAAGA	0.326351	-0.173229	0.782292	0.641123	0.407012	11.99	10.1819	15.6371	12.6046	6.14688
AKAP10	AKAP10_11216_1_2	CGCCGGAAGAAGGACATGGC	0.136421	0.5124	0.502437	1.03829	0.87307	11.99	10.1819	15.6371	12.6046	6.14688
AKAP13	AKAP13_11214_4_5	CCTTGATAAGAAGTTGGTGC	0.795657	-0.133821	0.745563	0.353737	-0.545317	5.13629	7.63657	18.8017	3.48294	8.15657
AKAP13	AKAP13_11214_4_13	TCCACTCCGTGGGCAGCTTC	-6.42599e-05	0.273629	-0.219947	-0.413313	0.303338	5.13629	7.63657	18.8017	3.48294	8.15657
AKAP13	AKAP13_11214_7_82	GAAAGTCGCTGAGGGTCCGT	0.134646	-0.472927	-0.205207	-0.230365	-0.121118	5.13629	7.63657	18.8017	3.48294	8.15657
AKAP13	AKAP13_sgAKAP13_7	GAACTTCCTGGATGTTGGAC	1.95107	1.57795	1.86385	0.583635	1.04946	5.13629	7.63657	18.8017	3.48294	8.15657
AKAP13	AKAP13_11214_5_5	AATGCATCAATGTCTCTCGC	-1.15963	-0.949782	-0.50523	-0.883861	-0.920868	5.13629	7.63657	18.8017	3.48294	8.15657
AKAP13	AKAP13_sgAKAP13_2	CCCTGATGCAGCATCTCTTC	0.971332	0.887236	0.624457	1.1019	0.333473	5.13629	7.63657	18.8017	3.48294	8.15657
AKAP13	AKAP13_11214_3_2	TCCGTCACTGTACAAGTACT	0.410997	-0.420865	-0.601463	-0.828798	-0.234594	5.13629	7.63657	18.8017	3.48294	8.15657
AKAP13	AKAP13_11214_4_7	GCCCACGGAGTGGAATGTAT	-0.263911	0.0177387	0.194721	0.519753	0.149191	5.13629	7.63657	18.8017	3.48294	8.15657
AKAP13	AKAP13_sgAKAP13_5	TTCAGAATGTGAGAACTTCC	1.84683	0.949974	0.966899	-0.256038	1.84307	5.13629	7.63657	18.8017	3.48294	8.15657
AKAP13	AKAP13_sgAKAP13_10	ATGCTGTCCATGTCATCACT	-0.0645867	0.471738	0.0695719	-0.127688	-0.314364	5.13629	7.63657	18.8017	3.48294	8.15657
AKAP13	AKAP13_sgAKAP13_1	AGAGATGCTGCATCAGGGCA	0.480928	0.0175767	1.47482	1.36886	0.699508	5.13629	7.63657	18.8017	3.48294	8.15657
AKAP13	AKAP13_11214_5_10	GCACTTACTCGGTTAGAAGC	-2.00461	-0.985025	-0.917644	-1.08278	-1.11678	5.13629	7.63657	18.8017	3.48294	8.15657
AKAP13	AKAP13_sgAKAP13_9	TCACTCACCCAGTGATGACA	0.528852	0.626247	0.653347	0.0281701	-0.751339	5.13629	7.63657	18.8017	3.48294	8.15657
AKAP13	AKAP13_sgAKAP13_8	CATCACTGGGTGAGTGAAAG	0.672268	1.47581	0.268222	0.209389	0.461321	5.13629	7.63657	18.8017	3.48294	8.15657
AKAP13	AKAP13_11214_7_78	TAAGACTGTCCATCTGCTTG	0.102886	-0.0998338	0.499739	0.209551	-0.393523	5.13629	7.63657	18.8017	3.48294	8.15657
AKAP13	AKAP13_sgAKAP13_6	TGTGAGAACTTCCTGGATGT	0.569098	0.808188	0.582027	0.278065	-0.600211	5.13629	7.63657	18.8017	3.48294	8.15657
AKAP13	AKAP13_sgAKAP13_4	CAGCTTACCTGGGCTCTGCT	0.524266	-0.232681	0.549408	0.00646213	0.572851	5.13629	7.63657	18.8017	3.48294	8.15657
AKAP13	AKAP13_11214_5_9	CTTGTGATAGCCTCGCTCCA	0.234963	0.288559	0.121965	0.842558	-1.24108	5.13629	7.63657	18.8017	3.48294	8.15657
AKAP13	AKAP13_11214_4_14	CCCAATACATTCCACTCCGT	-0.489761	0.231273	-0.840728	-0.628863	-0.933861	5.13629	7.63657	18.8017	3.48294	8.15657
AKAP13	AKAP13_sgAKAP13_3	CTGGCTTCCAAGCAGAGCCC	0.259557	0.217416	0.616081	-0.279359	-0.528629	5.13629	7.63657	18.8017	3.48294	8.15657
AKAP8	AKAP8_sgAKAP8_10	GGTTGCGCCTGTGGTGACAC	-0.891466	-0.472258	-1.38314	0.229052	-2.19037	17.9677	19.3571	20.6858	20.3574	10.9074
AKAP8	AKAP8_sgAKAP8_8	GAAGGGCTTACCTTGCCAGC	0.286216	-0.323524	-0.765701	-1.16007	-0.818807	17.9677	19.3571	20.6858	20.3574	10.9074
AKAP8	AKAP8_sgAKAP8_4	GCTGGACCTGCCAACACCCA	-0.399812	0.451228	0.387211	0.136402	0.530082	17.9677	19.3571	20.6858	20.3574	10.9074
AKAP8	AKAP8_10270_4_10	GTAGCTGTAGGTTGCGCCTG	-0.766565	-0.681229	-0.0658163	-0.565056	-1.3238	17.9677	19.3571	20.6858	20.3574	10.9074
AKAP8	AKAP8_10270_4_4	GAGTCGGAATTGTCGGTGCA	-0.175403	0.127097	0.171064	0.853004	0.0208208	17.9677	19.3571	20.6858	20.3574	10.9074
AKAP8	AKAP8_sgAKAP8_3	AACACAAACCTCCGTAGCCC	-0.575982	-0.623272	-0.926432	-0.644046	-0.179803	17.9677	19.3571	20.6858	20.3574	10.9074
AKAP8	AKAP8_sgAKAP8_2	GACATGGACCAGGGCTACGG	0.0963813	0.417215	0.070771	-1.21794	-0.355596	17.9677	19.3571	20.6858	20.3574	10.9074
AKAP8	AKAP8_10270_4_5	GCATGGCTCTGGGCCGTAAG	-0.0565677	-0.231079	0.250254	1.00664	0.374647	17.9677	19.3571	20.6858	20.3574	10.9074
AKAP8	AKAP8_sgAKAP8_6	ATGGAACTGGTGTGGCCAGC	1.02731	-0.0495566	0.520367	0.700128	0.586792	17.9677	19.3571	20.6858	20.3574	10.9074
AKAP8	AKAP8_10270_5_19	AGGACTCGAACGGCTGGAAG	0.909851	0.48385	-0.400523	0.279197	1.14021	17.9677	19.3571	20.6858	20.3574	10.9074
AKAP8	AKAP8_sgAKAP8_9	CAGAACACCAGTGTCACCAC	0.393572	0.572595	-0.268045	0.672144	0.00673782	17.9677	19.3571	20.6858	20.3574	10.9074
AKAP8	AKAP8_10270_4_9	CGAGGCTGGGCCGTAGCTGT	-0.215416	-0.435227	-0.0159299	-0.486133	-0.870374	17.9677	19.3571	20.6858	20.3574	10.9074
AKAP8	AKAP8_sgAKAP8_5	AGCCCACTTACCCTGGGTGT	0.351067	0.549392	-0.337715	-0.368746	0.579865	17.9677	19.3571	20.6858	20.3574	10.9074
AKAP8	AKAP8_10270_4_20	ACAGGCGCAACCTACAGCTA	0.1005	0.121407	-0.00860286	0.274754	0.440493	17.9677	19.3571	20.6858	20.3574	10.9074
AKAP8	AKAP8_10270_4_8	TTGGCGGCCTCCCACGAGGC	0.253281	0.118573	0.378785	-0.10496	0.244514	17.9677	19.3571	20.6858	20.3574	10.9074
AKAP8	AKAP8_sgAKAP8_7	ACTGGTGTGGCCAGCTGGCA	0.529501	0.0891026	-0.664944	0.364967	0.0178043	17.9677	19.3571	20.6858	20.3574	10.9074
AKAP8	AKAP8_10270_4_16	ATGATGGCGGCCTGGCGGCC	0.81881	0.149936	0.701237	0.383283	1.05543	17.9677	19.3571	20.6858	20.3574	10.9074
AKNA	AKNA_sgAKNA_9	GGGCCAGGCGGAAGTCCTCT	0.453035	0.519329	0.178003	-0.131308	0.750932	1.8286	0.934767	1.40824	1.29528	1.82748
AKNA	AKNA_sgAKNA_10	GCGGCAGGTGCTGCTGGGCC	0.379481	-0.182281	0.0809944	-0.563139	0.503985	1.8286	0.934767	1.40824	1.29528	1.82748
AKNA	AKNA_sgAKNA_3	GAGATCCGCTGGGCTGAGCC	1.93603	2.31835	2.30324	1.85437	1.53827	1.8286	0.934767	1.40824	1.29528	1.82748
AKNA	AKNA_80709_3_38	AGACTTCCGAGGGTCCCATC	1.31466	0.121965	0.679471	1.25406	0.176438	1.8286	0.934767	1.40824	1.29528	1.82748
AKNA	AKNA_sgAKNA_8	GCGGAAGTCCTCTAGGAGCT	0.489566	0.383403	0.937451	0.127566	0.225521	1.8286	0.934767	1.40824	1.29528	1.82748
AKNA	AKNA_80709_2_9	GCGGATCTCAGTCTCCGAGC	0.33763	-0.80498	0.168412	0.698421	0.0976361	1.8286	0.934767	1.40824	1.29528	1.82748
AKNA	AKNA_sgAKNA_4	CGCTGGGCTGAGCCTGGCCT	0.237797	0.65998	0.481594	0.550602	0.507498	1.8286	0.934767	1.40824	1.29528	1.82748
AKNA	AKNA_80709_2_17	GCTCCTAGAGGACTTCCGCC	1.57104	0.805125	0.936726	0.765886	1.27057	1.8286	0.934767	1.40824	1.29528	1.82748
AKNA	AKNA_80709_3_35	TTCAACGGATGGGTTGACCT	-0.0969279	-0.14638	-0.0980263	-0.510082	-0.668184	1.8286	0.934767	1.40824	1.29528	1.82748
AKNA	AKNA_80709_3_65	CGGCAAGGTCCTGGAGCAGT	0.604528	0.290251	0.0531084	-0.0600566	0.974392	1.8286	0.934767	1.40824	1.29528	1.82748
AKNA	AKNA_80709_3_58	AGCATGCCACAGATAGATGG	-0.450606	-0.129072	0.297005	0.220512	-0.239715	1.8286	0.934767	1.40824	1.29528	1.82748
AKNA	AKNA_sgAKNA_7	TAGAAGTAGTTCACAAAGCT	-0.145049	0.0193216	0.0210241	0.250626	0.297717	1.8286	0.934767	1.40824	1.29528	1.82748
AKNA	AKNA_sgAKNA_2	CTCGGAGACTGAGATCCGCT	0.789852	0.889015	0.873518	1.45361	0.669002	1.8286	0.934767	1.40824	1.29528	1.82748
AKNA	AKNA_sgAKNA_5	ATCCCTCTTGTCCTCGGCCC	0.186535	0.175913	-0.0817559	-0.27409	-0.117475	1.8286	0.934767	1.40824	1.29528	1.82748
AKNA	AKNA_80709_3_66	CCGTTGAACTCAGCCCGGCA	-0.0312234	0.876093	0.440164	0.743649	0.0958276	1.8286	0.934767	1.40824	1.29528	1.82748
AKNA	AKNA_80709_2_1	TCCCGAAGTCTCTCCTGACT	0.370765	0.338707	-0.274421	0.0562605	-0.733572	1.8286	0.934767	1.40824	1.29528	1.82748
AKNA	AKNA_80709_2_16	CCCGCAGCCCGATGGGCATC	0.393312	0.487193	0.0696154	-0.221756	-0.120657	1.8286	0.934767	1.40824	1.29528	1.82748
AKNA	AKNA_sgAKNA_6	ATCCACATCCCTCTTGTCCT	0.110679	0.0995383	0.0327087	-0.0376339	0.788936	1.8286	0.934767	1.40824	1.29528	1.82748
AKNA	AKNA_sgAKNA_1	TCAGTCTCCGAGCTGGCCAT	1.47383	-0.0788484	-0.279459	0.67764	0.666374	1.8286	0.934767	1.40824	1.29528	1.82748
AKNA	AKNA_80709_2_3	TGCCCATCGGGCTGCGGGTG	-0.955628	-0.958948	-0.989432	-0.331961	-0.439584	1.8286	0.934767	1.40824	1.29528	1.82748
AKT1	AKT1_207_5_2	GAAGGTGCGTTCGATGACAG	-0.885542	-3.14988	-0.978693	-2.62959	-0.436899	80.1753	73.4049	80.2004	80.208	223.458
AKT1	AKT1_207_7_9	GGGCAAGGGCACTTTCGGCA	0.908892	-0.15585	-0.877805	-0.703275	-1.25316	80.1753	73.4049	80.2004	80.208	223.458
AKT1	AKT1_sgAKT1_5	GAGGGTTGGCTGCACAAACG	0.594166	-1.50522	-1.13487	-0.696488	-1.15426	80.1753	73.4049	80.2004	80.208	223.458
AKT1	AKT1_sgAKT1_10	AGGTGCCATCATTCTTGAGG	-0.116482	-0.312856	-1.09792	-0.576941	-0.466299	80.1753	73.4049	80.2004	80.208	223.458
AKT1	AKT1_207_9_1	CGTACTCCATGACAAAGCAG	-0.566748	-0.310171	0.0482559	-0.382824	-0.00585324	80.1753	73.4049	80.2004	80.208	223.458
AKT1	AKT1_sgAKT1_6	GGGAGTACATCAAGACCTGG	0.466026	0.509564	-0.140559	-0.000604022	-0.219428	80.1753	73.4049	80.2004	80.208	223.458
AKT1	AKT1_sgAKT1_7	GAGGAAGTAGCGTGGCCGCC	0.70201	0.920231	1.18095	0.165927	0.559557	80.1753	73.4049	80.2004	80.208	223.458
AKT1	AKT1_207_4_6	GCAGGATGTGGACCAACGTG	-0.239702	-0.284635	0.28176	-0.107452	0.448295	80.1753	73.4049	80.2004	80.208	223.458
AKT1	AKT1_207_6_7	GAGGAGATGGACTTCCGGTC	-0.227794	0.144774	0.39615	0.457808	0.939268	80.1753	73.4049	80.2004	80.208	223.458
AKT1	AKT1_sgAKT1_8	TTCTTGAGGAGGAAGTAGCG	0.657203	-0.0577065	-0.0440785	-0.84926	0.0353726	80.1753	73.4049	80.2004	80.208	223.458
AKT1	AKT1_207_6_2	TGTCACTGGGTGAGCCCGAC	0.436756	0.285824	0.292235	0.109359	0.727418	80.1753	73.4049	80.2004	80.208	223.458
AKT1	AKT1_sgAKT1_3	CGACGTGGCTATTGTGAAGG	-0.0226474	-0.56677	-0.0739645	-0.0669852	-0.277925	80.1753	73.4049	80.2004	80.208	223.458
AKT1	AKT1_207_8_2	CGCGGTTCTCGGTGAGTGTG	-0.299703	-0.675711	0.251714	-0.778802	-0.295315	80.1753	73.4049	80.2004	80.208	223.458
AKT1	AKT1_sgAKT1_2	CACAATAGCCACGTCGCTCA	0.710314	-0.107362	-0.149469	0.164403	0.620382	80.1753	73.4049	80.2004	80.208	223.458
AKT1	AKT1_207_4_1	GCGCCACAGAGAAGTTGTTG	0.487789	-0.706945	0.0485885	-0.526778	0.253761	80.1753	73.4049	80.2004	80.208	223.458
AKT1	AKT1_sgAKT1_1	CTCGGGCACCATGAGCGACG	0.160299	-0.634309	-0.147441	0.290133	0.22189	80.1753	73.4049	80.2004	80.208	223.458
AKT1	AKT1_sgAKT1_4	TGGCTATTGTGAAGGAGGGT	-0.216166	-0.211741	-0.90328	-0.442517	-0.507968	80.1753	73.4049	80.2004	80.208	223.458
AKT1	AKT1_207_10_5	CCTCGGAGAACACACGCTCC	1.09986	-0.164058	0.223067	1.09821	1.18663	80.1753	73.4049	80.2004	80.208	223.458
AKT1	AKT1_sgAKT1_9	TACTTCCTCCTCAAGAATGA	-0.12468	-0.498722	0.350382	-0.256576	-0.214678	80.1753	73.4049	80.2004	80.208	223.458
AKT2	AKT2_sgAKT2_1	GGTGTTGGGTCGCGGCCTCT	-1.28457	-1.01445	-0.322883	-1.5586	-1.11125	22.1951	37.8662	25.6432	24.8507	20.3288
AKT2	AKT2_sgAKT2_3	GCAGCGTATGACAAAGGTGT	-0.478901	-0.72328	-0.293914	-0.298539	-0.571865	22.1951	37.8662	25.6432	24.8507	20.3288
AKT2	AKT2_208_5_3	GGAGCCACACTTGTAGTCCA	-1.15936	0.118192	0.118195	-0.0681229	-0.135523	22.1951	37.8662	25.6432	24.8507	20.3288
AKT2	AKT2_208_5_9	CGCCAACAGCCTCAAGCAGC	-0.266761	-0.0154708	1.00393	0.374973	0.593772	22.1951	37.8662	25.6432	24.8507	20.3288
AKT2	AKT2_sgAKT2_6	GAAGGTCCTCTCGATGACTG	0.605442	0.713089	0.556161	-0.959848	0.391562	22.1951	37.8662	25.6432	24.8507	20.3288
AKT2	AKT2_sgAKT2_2	ATGACAAAGGTGTTGGGTCG	-2.28057	-1.4546	-2.35494	-2.0912	-2.34632	22.1951	37.8662	25.6432	24.8507	20.3288
AKT2	AKT2_sgAKT2_8	GTCTGGAGAATCCACGTGGA	0.713646	0.814023	0.778192	0.557187	0.291714	22.1951	37.8662	25.6432	24.8507	20.3288
AKT2	AKT2_208_3_4	CTCTTCAGCAGGAAGTACCG	0.409569	0.19633	0.291744	0.233079	0.29399	22.1951	37.8662	25.6432	24.8507	20.3288
AKT2	AKT2_208_5_1	CACTTCCATCTCCTCAGTCG	0.0054753	-0.166895	0.026029	-1.0937	-0.435597	22.1951	37.8662	25.6432	24.8507	20.3288
AKT2	AKT2_sgAKT2_10	GCCCAGACTGACCTCTCGTC	0.0263952	0.189628	0.0662309	0.112917	0.564163	22.1951	37.8662	25.6432	24.8507	20.3288
AKT2	AKT2_sgAKT2_5	AGTGGACCACAGTCATCGAG	0.668059	-0.336504	-0.0884261	0.599927	0.350806	22.1951	37.8662	25.6432	24.8507	20.3288
AKT2	AKT2_208_5_10	GTGGATGCGGGCCATCCAGA	-0.664581	0.543581	-0.507025	-0.200611	0.325349	22.1951	37.8662	25.6432	24.8507	20.3288
AKT2	AKT2_208_4_1	TCTCGTCTGGAGAATCCACG	-0.205169	-0.105228	-0.573665	-0.585147	-0.568646	22.1951	37.8662	25.6432	24.8507	20.3288
AKT2	AKT2_208_5_2	CTCAGTCGTGGAGGAGTCAC	0.11341	-0.0453429	0.46023	-0.157859	0.641403	22.1951	37.8662	25.6432	24.8507	20.3288
AKT2	AKT2_208_3_1	ACGGAGAAGTTGTTTAAGGG	-1.48495	-0.280213	-1.0382	0.424179	-0.590317	22.1951	37.8662	25.6432	24.8507	20.3288
AKT2	AKT2_sgAKT2_7	CATCGAGAGGACCTTCCACG	0.597156	0.736401	1.31533	0.268736	1.13683	22.1951	37.8662	25.6432	24.8507	20.3288
AKT2	AKT2_sgAKT2_9	ACGTGGATTCTCCAGACGAG	1.1498	1.05935	0.365614	0.516086	0.541726	22.1951	37.8662	25.6432	24.8507	20.3288
AKT2	AKT2_208_6_11	CTATCTCAAACTCCTTGGCA	-0.178203	-0.509584	-0.611598	-0.761389	-0.506909	22.1951	37.8662	25.6432	24.8507	20.3288
AKT3	AKT3_sgAKT3_4	AAGACAGATGGCTCATTCAT	1.39896	0.845426	-2.12063	2.92121	-0.561033	0.448792	14.8364	0.120663	3.36444	14.4834
AKT3	AKT3_10000_14_124	ATCAGATCCGTGCGTGAAGT	-0.513315	0.151704	0.246501	-0.37458	0.60086	0.448792	14.8364	0.120663	3.36444	14.4834
AKT3	AKT3_10000_14_56	GTGAGGACCCTTGGCTGGTC	1.13376	0.105262	0.924678	0.119453	0.455131	0.448792	14.8364	0.120663	3.36444	14.4834
AKT3	AKT3_10000_14_118	GATGGCTGAAGAATGTAGAC	1.74891	1.39527	0.978742	1.15229	1.07426	0.448792	14.8364	0.120663	3.36444	14.4834
AKT3	AKT3_10000_9_4	GCCTTGGACTATCTACATTC	0.626569	0.478061	0.63549	0.386161	0.25546	0.448792	14.8364	0.120663	3.36444	14.4834
AKT3	AKT3_10000_14_50	GTGCATATGCCTTCAGTTCT	1.3817	0.790796	0.349174	1.20213	0.884268	0.448792	14.8364	0.120663	3.36444	14.4834
AKT3	AKT3_sgAKT3_3	AGAAGGTTGGGTTCAGAAGA	0.0844075	0.028905	1.24012	1.13273	1.31768	0.448792	14.8364	0.120663	3.36444	14.4834
AKT3	AKT3_sgAKT3_2	AACCCAACCTTCTTTCACAA	0.769173	-0.0878666	0.869549	0.247651	0.454311	0.448792	14.8364	0.120663	3.36444	14.4834
AKT3	AKT3_sgAKT3_1	GATGTTACCATTGTGAAAGA	-0.334117	-0.828087	0.1154	0.234911	-1.03289	0.448792	14.8364	0.120663	3.36444	14.4834
AKT3	AKT3_sgAKT3_6	TAAGGTAAATCCACATCTTG	1.5015	-0.406357	-0.236533	0.0613441	-0.189257	0.448792	14.8364	0.120663	3.36444	14.4834
AKT3	AKT3_10000_14_119	GCACAGTCAAGGTCACTTAA	0.911025	0.437265	0.603045	0.859985	0.755559	0.448792	14.8364	0.120663	3.36444	14.4834
AKT3	AKT3_10000_11_1	GCATCTGAAGAGAGTGTTCG	0.944197	1.51349	0.112128	0.508494	0.835686	0.448792	14.8364	0.120663	3.36444	14.4834
AKT3	AKT3_sgAKT3_10	TCTCTATAACAGTAGTCCAC	0.630563	-0.386637	0.543617	0.322028	0.183891	0.448792	14.8364	0.120663	3.36444	14.4834
AKT3	AKT3_sgAKT3_9	TTATAATCAGATGTCTCCAG	-0.260867	-0.506251	0.264123	-0.459515	-0.940988	0.448792	14.8364	0.120663	3.36444	14.4834
AKT3	AKT3_sgAKT3_5	TAAAGAGAAACCTCAAGATG	0.607155	0.384251	-0.0413408	0.664164	0.0864689	0.448792	14.8364	0.120663	3.36444	14.4834
AKT3	AKT3_10000_9_1	TCCGGAATGTAGATAGTCCA	1.01506	0.645572	0.381932	0.780395	0.0694827	0.448792	14.8364	0.120663	3.36444	14.4834
AKT3	AKT3_sgAKT3_8	CATCTGATTATAAATGTGTT	0.0966899	0.233626	0.914289	-0.458151	0.0278943	0.448792	14.8364	0.120663	3.36444	14.4834
AKT3	AKT3_10000_9_3	ACACCCGCTCTCTCGACAAA	1.56862	1.02035	1.35895	0.506292	0.819093	0.448792	14.8364	0.120663	3.36444	14.4834
AKT3	AKT3_10000_9_2	CTGCACCATAGAAACGTGTG	0.138405	-0.044971	0.862946	1.06692	0.0820272	0.448792	14.8364	0.120663	3.36444	14.4834
AKT3	AKT3_sgAKT3_7	ATTATAAATGTGTTTGGCTT	0.428751	-0.299706	0.0331238	-0.220434	-0.0816109	0.448792	14.8364	0.120663	3.36444	14.4834
ALDH3A1	ALDH3A1_218_3_17	GGAGGTGGTGTACGTCCTAG	-1.67995	-1.41798	-0.807822	-2.12375	-1.85809	54.6226	0.0540218	72.0031	0.0361304	0.201549
ALDH3A1	ALDH3A1_218_2_5	GGCCTCGCTGATCTTGCTCA	0.0397729	0.928331	1.14298	-0.475298	0.763675	54.6226	0.0540218	72.0031	0.0361304	0.201549
ALDH3A1	ALDH3A1_218_3_15	GGACGAGCTCTACATCCACT	0.377807	0.975197	0.866405	0.755755	0.661205	54.6226	0.0540218	72.0031	0.0361304	0.201549
ALDH3A1	ALDH3A1_218_3_18	GAACGCCTACTATGAGGAGG	-0.279163	0.311895	-0.354582	0.0947861	0.332483	54.6226	0.0540218	72.0031	0.0361304	0.201549
ALDH3A1	ALDH3A1_218_2_20	CGCCATGAGCAAGATCAGCG	1.04556	1.59626	0.625238	0.946318	0.412155	54.6226	0.0540218	72.0031	0.0361304	0.201549
ALDH3A1	ALDH3A1_218_6_1	GCTTCTCCACAATTTGGTTC	0.316264	-0.250034	0.607506	-0.094823	0.464367	54.6226	0.0540218	72.0031	0.0361304	0.201549
ALDH3A1	ALDH3A1_218_2_4	ACGGGTCCTGCCCGAGCTGA	-1.68311	0.603182	0.024008	0.202758	0.0892974	54.6226	0.0540218	72.0031	0.0361304	0.201549
ALDH3A1	ALDH3A1_218_6_3	CTCGATCCAGAACCAAATTG	-0.425884	0.865103	0.678276	0.264116	0.670417	54.6226	0.0540218	72.0031	0.0361304	0.201549
ALDH3A1	ALDH3A1_218_3_13	TGGTCCTCGTCATTGGCACC	0.35415	0.761046	0.968717	0.436863	1.10977	54.6226	0.0540218	72.0031	0.0361304	0.201549
ALDH3A1	ALDH3A1_218_6_4	GAACAGTGGCCAGACCTGCG	1.9429	0.970302	1.17292	0.248833	1.05045	54.6226	0.0540218	72.0031	0.0361304	0.201549
ALDH3A1	ALDH3A1_218_3_3	AGTTCCAGGTGCCAATGACG	0.87417	-0.116229	0.390851	0.544849	0.450096	54.6226	0.0540218	72.0031	0.0361304	0.201549
ALDH3A1	ALDH3A1_218_5_10	TTCGACCATATCCTGTACAC	-0.685479	-0.316094	-0.725069	-0.514741	-0.435282	54.6226	0.0540218	72.0031	0.0361304	0.201549
ALDH3A1	ALDH3A1_218_5_12	CTGTACCCAGTAATCAATGG	-0.602593	0.101591	-0.10562	0.522072	-0.343811	54.6226	0.0540218	72.0031	0.0361304	0.201549
ALDH3A1	ALDH3A1_218_3_10	TCATGTACTCGATCTCCTCT	-0.124539	-0.589711	-1.0263	-0.236291	-0.525934	54.6226	0.0540218	72.0031	0.0361304	0.201549
ALDH3A1	ALDH3A1_218_3_5	CCACGCCCAGTGGCTCCGAG	0.538207	1.14262	0.534036	0.184323	0.816444	54.6226	0.0540218	72.0031	0.0361304	0.201549
ALDH3A1	ALDH3A1_218_5_4	TGCTGCCCGTGTACAGGATA	-0.217706	-0.189141	0.135453	0.520719	0.920071	54.6226	0.0540218	72.0031	0.0361304	0.201549
ALDH3A1	ALDH3A1_218_3_4	ATGACGAGGACCACGCCCAG	0.733761	1.11081	1.0869	0.426767	0.708186	54.6226	0.0540218	72.0031	0.0361304	0.201549
ALDH3A1	ALDH3A1_218_5_2	ACAGTTCTTGTCCACGTAGC	0.363645	0.453252	0.856366	0.358146	-0.0158369	54.6226	0.0540218	72.0031	0.0361304	0.201549
ALDH3A1	ALDH3A1_218_5_5	CCTCTCCTTGAGCAGCTCCG	-0.225297	-0.167819	-0.36031	0.466573	0.648112	54.6226	0.0540218	72.0031	0.0361304	0.201549
ALDH3A1	ALDH3A1_218_4_3	TGAGAACATGGCGAGCCTGC	1.29479	1.51413	1.07442	0.40729	1.60112	54.6226	0.0540218	72.0031	0.0361304	0.201549
ALDH3A2	ALDH3A2_224_1_13	GGTCGCGACCTCTGCGGTTT	0.402055	-0.653653	-0.308295	-0.771106	0.170189	54.9099	12.103	62.9729	20.4237	7.27454
ALDH3A2	ALDH3A2_224_1_18	GCGCGAGAAGGATATCCTGA	0.1397	-0.556551	0.697357	0.589835	-0.312088	54.9099	12.103	62.9729	20.4237	7.27454
ALDH3A2	ALDH3A2_224_1_17	GATGGTGCAGGAGCGCGAGA	-0.508571	-1.04022	-1.09063	-1.1408	-1.36814	54.9099	12.103	62.9729	20.4237	7.27454
ALDH3A2	ALDH3A2_224_1_31	CACGCGTGCGTACCTTGCAC	-0.840058	-0.23492	-0.998238	-0.124981	-0.453085	54.9099	12.103	62.9729	20.4237	7.27454
ALDH3A2	ALDH3A2_224_1_12	GTCCGACAGGCGTTCCTGTC	1.42648	0.54656	-0.166115	0.0171642	0.862187	54.9099	12.103	62.9729	20.4237	7.27454
ALDH3A2	ALDH3A2_224_1_27	GAAACCGCAGAGGTCGCGAC	0.247616	0.26767	0.325773	0.885971	0.108212	54.9099	12.103	62.9729	20.4237	7.27454
ALDH3A2	ALDH3A2_224_2_7	GTGAGCACGTTCTTCTTAAC	0.456565	0.462833	0.24807	0.580363	0.932708	54.9099	12.103	62.9729	20.4237	7.27454
ALDH3A2	ALDH3A2_224_5_1	AGTCGGGTGCAATGCAGGTT	-0.880123	-0.286276	-0.739754	-0.619398	-0.6712	54.9099	12.103	62.9729	20.4237	7.27454
ALDH3A2	ALDH3A2_224_9_8	GCACAGCGGCTACAATACCC	0.32333	-0.769638	0.268634	0.801313	-0.113682	54.9099	12.103	62.9729	20.4237	7.27454
ALDH3A2	ALDH3A2_224_1_26	GGAACGCCTGTCGGACCCGC	-0.437814	-0.584584	-0.001311	-0.541995	0.694625	54.9099	12.103	62.9729	20.4237	7.27454
ALDH3A2	ALDH3A2_224_1_28	TGCTGCAGCCGAAACCGCAG	0.682866	0.0977496	-0.0579303	0.0047944	0.466584	54.9099	12.103	62.9729	20.4237	7.27454
ALDH3A2	ALDH3A2_224_1_11	CGAAGTCCGGCGGGTCCGAC	0.127771	-0.410624	0.170977	-0.00989275	-0.192985	54.9099	12.103	62.9729	20.4237	7.27454
ALDH3A2	ALDH3A2_224_10_4	TGGTGTTCATCTCTGCTTAC	-0.509067	-0.100152	0.672309	0.238472	0.273831	54.9099	12.103	62.9729	20.4237	7.27454
ALDH3A2	ALDH3A2_224_4_5	TGTGGTCAAATCGCTGCTTC	0.46544	0.0417375	0.199131	-0.220531	0.0310213	54.9099	12.103	62.9729	20.4237	7.27454
ALDH3A2	ALDH3A2_224_1_30	CTTGCACAGGTCGGCGGCGA	-1.08634	-0.295865	-0.258786	-0.0383795	-0.0788787	54.9099	12.103	62.9729	20.4237	7.27454
ALDH3A2	ALDH3A2_224_8_2	ACGCTCAACTCTTTCCCATT	0.0146204	-0.256917	-0.0444972	0.983454	0.079631	54.9099	12.103	62.9729	20.4237	7.27454
ALDH3A2	ALDH3A2_224_6_1	TCCATTACCTATGTAGCGTG	-0.108562	-0.194992	-0.505836	-0.515615	-0.317693	54.9099	12.103	62.9729	20.4237	7.27454
ALDH3A2	ALDH3A2_224_4_4	TCGCTGCTTCAGGAGCTCCG	0.987418	0.526888	0.758875	0.924245	0.289535	54.9099	12.103	62.9729	20.4237	7.27454
ALDH3A2	ALDH3A2_224_9_6	ACCTTTGACTGGCTGTTGGG	0.77912	0.311565	0.456748	-0.859339	0.185783	54.9099	12.103	62.9729	20.4237	7.27454
ALDH3A2	ALDH3A2_224_4_2	TATACGGGAAACACTGCGGT	-0.650298	0.104651	0.130445	-0.838989	-0.667603	54.9099	12.103	62.9729	20.4237	7.27454
ALG5	ALG5_29880_2_2	TCTTCATGTCGATGGAGTGC	0.0845933	-2.27374	-0.0983049	-3.44964	0.992101	50.8025	33.82	37.6986	59.8106	15.549
ALG5	ALG5_29880_3_2	TCTTCAAGTGCCTGTGATGA	1.85712	0.360891	1.34558	1.08242	-0.000556261	50.8025	33.82	37.6986	59.8106	15.549
ALG5	ALG5_29880_6_2	GGCTAAATGATCTACAGCCT	0.700843	0.546727	-0.630628	1.07081	0.658316	50.8025	33.82	37.6986	59.8106	15.549
ALG5	ALG5_29880_1_5	GGCTCCGCTTCTGTTGCAGC	-0.101169	-0.478427	0.202854	0.423961	0.537062	50.8025	33.82	37.6986	59.8106	15.549
ALG5	ALG5_29880_2_1	GGTAGGTGAGTCCCATATGC	-1.4349	-1.80788	-0.843146	-0.459139	-0.145056	50.8025	33.82	37.6986	59.8106	15.549
ALG5	ALG5_29880_1_6	GGCTGCCACGGCATGGAGAA	1.86088	0.345994	0.055803	0.461126	0.736632	50.8025	33.82	37.6986	59.8106	15.549
ALG5	ALG5_29880_3_1	AGAGCTTCATCCATCATCAC	0.467087	-0.7259	0.926026	0.630747	-0.933904	50.8025	33.82	37.6986	59.8106	15.549
ALG5	ALG5_29880_8_5	GTGTGGTTCCTTTGTGTCAA	0.119684	-0.577691	-0.974779	0.293014	-0.948832	50.8025	33.82	37.6986	59.8106	15.549
ALG5	ALG5_29880_1_4	CTGTTGCAGCTGGCGGTGCT	0.583609	0.00701746	0.675897	0.00678004	0.237921	50.8025	33.82	37.6986	59.8106	15.549
ALG5	ALG5_29880_1_1	ACCGCCAGCTGCAACAGAAG	1.37589	1.1668	0.591917	0.819664	0.308612	50.8025	33.82	37.6986	59.8106	15.549
ALG5	ALG5_29880_8_4	GAATCAGGGACACACAGTGT	-0.0325279	-1.29631	-0.65215	-0.322674	-1.71877	50.8025	33.82	37.6986	59.8106	15.549
ALG5	ALG5_29880_6_4	CAGGGTATATTCAGTTCTCG	0.191204	-0.944764	-0.437535	-0.373857	-0.223075	50.8025	33.82	37.6986	59.8106	15.549
ALG5	ALG5_29880_6_1	CTCCATCAGCATCTGCCATA	0.573175	-0.634395	0.274103	0.924832	-0.0519876	50.8025	33.82	37.6986	59.8106	15.549
ALG5	ALG5_29880_5_2	CAAAGTACGTGTGATAACCC	-0.82352	-2.76455	-0.199625	-1.27125	-1.54195	50.8025	33.82	37.6986	59.8106	15.549
ALG5	ALG5_29880_8_1	CCCTGATTCCTTTGACACAA	0.247587	0.477479	0.375364	0.746053	0.212635	50.8025	33.82	37.6986	59.8106	15.549
ALG5	ALG5_29880_8_2	AAAGGAACCACACCAGAAAG	-0.135573	-1.05617	-0.0420408	-0.428293	-0.593333	50.8025	33.82	37.6986	59.8106	15.549
ALG5	ALG5_29880_1_2	CGGAGCCATTCTCCATGCCG	0.0089144	-0.473151	0.350001	0.416258	-1.01577	50.8025	33.82	37.6986	59.8106	15.549
ALG5	ALG5_29880_8_3	TTACTCGAGAAGCAGCTTCA	-0.408543	-0.332754	0.305862	-0.240569	-0.0448955	50.8025	33.82	37.6986	59.8106	15.549
ALG5	ALG5_29880_6_3	ATCCTTATGGCAGATGCTGA	0.071199	-2.00839	0.00337038	-0.252246	0.321968	50.8025	33.82	37.6986	59.8106	15.549
ALG5	ALG5_29880_8_6	ATGGGTTCCACTTTCTGGTG	-0.741321	-0.483905	-0.0587192	-0.660295	-0.814025	50.8025	33.82	37.6986	59.8106	15.549
ALG8	ALG8_79053_1_6	GCGGCGCTCACAATTGCCAC	-0.630793	-1.22117	0.313152	0.638594	-1.04249	32.1632	34.8417	58.7965	28.3926	36.0197
ALG8	ALG8_79053_3_2	GGCAACTTCAGAGTGGACGT	-0.215736	-0.393918	-0.201592	-0.214278	-0.276935	32.1632	34.8417	58.7965	28.3926	36.0197
ALG8	ALG8_79053_6_1	CATAAGCTGGTGCTACATAG	-2.00193	-1.37435	0.0334928	-0.765773	-1.00026	32.1632	34.8417	58.7965	28.3926	36.0197
ALG8	ALG8_79053_8_5	GGGCCTCTGTCATGCATATT	-1.35774	-0.826432	-0.341564	-3.1857	0.108137	32.1632	34.8417	58.7965	28.3926	36.0197
ALG8	ALG8_79053_1_7	GTGCGGTGCCGCAGCAATGG	-1.57641	-0.0726432	-0.0585811	-0.471288	-0.171356	32.1632	34.8417	58.7965	28.3926	36.0197
ALG8	ALG8_79053_2_1	GAGTGATAGCAAGCCAGTTT	-0.471906	-0.42464	0.0980032	-0.342405	-0.512467	32.1632	34.8417	58.7965	28.3926	36.0197
ALG8	ALG8_79053_6_2	CTCTATGTAGCACCAGCTTA	-0.919794	-0.977488	-0.265313	-0.31964	-1.18066	32.1632	34.8417	58.7965	28.3926	36.0197
ALG8	ALG8_79053_8_1	GAGCCCAATATGCATGACAG	-1.04531	-0.73445	-0.312255	-1.11168	-0.49963	32.1632	34.8417	58.7965	28.3926	36.0197
ALG8	ALG8_79053_7_3	CTGTAGATGGGTCTATTCGA	-1.15322	-1.26631	-1.05137	-1.04282	-1.77163	32.1632	34.8417	58.7965	28.3926	36.0197
ALG8	ALG8_79053_1_2	TGTGAGCGCCGCCATTGCTG	-2.2944	-1.68084	-0.566947	-1.54648	-1.27941	32.1632	34.8417	58.7965	28.3926	36.0197
ALG8	ALG8_79053_7_1	TCTTTCATTGGGTCCTTTCC	-0.783158	-0.105896	0.271707	0.442144	-0.28113	32.1632	34.8417	58.7965	28.3926	36.0197
ALG8	ALG8_79053_3_1	CAAACCATGCAAAGAAAGGG	-1.3343	-0.668197	-0.274761	-0.118796	-0.753331	32.1632	34.8417	58.7965	28.3926	36.0197
ALG8	ALG8_79053_8_3	CTGGGCTTTGTACAATGCTT	-0.239978	-0.147475	-0.596696	0.304511	-0.797517	32.1632	34.8417	58.7965	28.3926	36.0197
ALG8	ALG8_79053_8_6	CGACTCTTTCCTTTCAAGAG	-1.37913	-1.0892	-0.0915159	-0.778103	0.530786	32.1632	34.8417	58.7965	28.3926	36.0197
ALG8	ALG8_79053_1_1	AAACCAATTGCCAGTACCCG	-0.85878	-0.40407	-0.232164	-0.607349	-0.0160863	32.1632	34.8417	58.7965	28.3926	36.0197
ALG8	ALG8_79053_1_5	TTGCCACGGGTACTGGCAAT	0.0584878	-0.118166	-0.120412	-0.0658884	-0.57209	32.1632	34.8417	58.7965	28.3926	36.0197
ALG8	ALG8_79053_9_6	TGAGGCCTTGGGAATATTGT	-1.06654	-0.434572	-0.337488	0.539743	-0.512134	32.1632	34.8417	58.7965	28.3926	36.0197
ALG8	ALG8_79053_8_2	CCCTCTTGAAAGGAAAGAGT	-1.05913	-1.40846	-0.423163	0.441245	-0.348235	32.1632	34.8417	58.7965	28.3926	36.0197
ALG8	ALG8_79053_8_4	CATATTGGGCTCCAAACTTC	0.348843	-0.37531	0.00334877	0.102974	0.355577	32.1632	34.8417	58.7965	28.3926	36.0197
ALKBH1	ALKBH1_8846_5_6	TCAGGATCCCTGCTTCAGCT	0.770699	1.01661	1.17181	0.132471	1.92164	9.53687	5.94508	7.91768	4.28825	4.55474
ALKBH1	ALKBH1_8846_1_10	GACTCTGGCGACTGAGCCCG	-0.118946	-0.639398	-0.66017	-0.962235	-1.89573	9.53687	5.94508	7.91768	4.28825	4.55474
ALKBH1	ALKBH1_8846_1_13	AGGGTATAGGCCGCGAGATG	-2.96202	0.17089	-0.335685	-0.876208	-1.34651	9.53687	5.94508	7.91768	4.28825	4.55474
ALKBH1	ALKBH1_8846_6_28	GTCACCACTGTGCATAAACA	0.630064	0.0884829	-0.21649	0.191253	0.654524	9.53687	5.94508	7.91768	4.28825	4.55474
ALKBH1	ALKBH1_8846_6_26	GAAGGACACGAGGGACTGCG	1.11658	0.430842	0.961973	0.532986	0.816874	9.53687	5.94508	7.91768	4.28825	4.55474
ALKBH1	ALKBH1_8846_1_4	GCCGGCTCTGACGGTAGAAG	0.0318503	0.298899	0.0104803	-0.854998	-0.704978	9.53687	5.94508	7.91768	4.28825	4.55474
ALKBH1	ALKBH1_8846_4_3	GTTTACTGGAGAAACTGCGT	0.70201	-0.792355	-0.497708	0.488558	-0.234066	9.53687	5.94508	7.91768	4.28825	4.55474
ALKBH1	ALKBH1_8846_1_9	TCTACCGTCAGAGCCGGCCC	0.384623	0.0878421	-0.200955	-0.295946	0.307309	9.53687	5.94508	7.91768	4.28825	4.55474
ALKBH1	ALKBH1_8846_4_1	CCGTAGGCTACCATTATAAC	-0.75365	0.180986	-0.115598	-0.602497	0.282733	9.53687	5.94508	7.91768	4.28825	4.55474
ALKBH1	ALKBH1_8846_5_11	GATCCTGAATTACTACCGCC	-0.232935	0.503445	0.340343	0.0456927	0.422799	9.53687	5.94508	7.91768	4.28825	4.55474
ALKBH1	ALKBH1_8846_1_2	ACCCTTGCCACGGGCTGCGT	-0.139156	0.560986	0.334518	0.0401226	-0.176084	9.53687	5.94508	7.91768	4.28825	4.55474
ALKBH1	ALKBH1_8846_1_5	TTTCCGAAAGGCGTCCTCCC	0.0295683	0.38198	0.303703	0.748283	0.680727	9.53687	5.94508	7.91768	4.28825	4.55474
ALKBH1	ALKBH1_8846_4_2	AAACTGCGTTGGGTGACCGT	-0.460237	0.122495	-0.716669	-0.154551	0.147751	9.53687	5.94508	7.91768	4.28825	4.55474
ALKBH1	ALKBH1_8846_2_2	ATAGGCTTGCCACTTGCTGA	-0.167692	0.646885	-0.409458	-0.737149	0.0399967	9.53687	5.94508	7.91768	4.28825	4.55474
ALKBH1	ALKBH1_8846_3_2	ACTGTTTCACCCAGTGCCAC	-0.0614586	1.15979	0.568663	-0.155862	0.648755	9.53687	5.94508	7.91768	4.28825	4.55474
ALKBH1	ALKBH1_8846_6_51	ACGGCCATGTTTATGCACAG	-0.0432461	-0.334151	0.706839	-0.280321	0.446233	9.53687	5.94508	7.91768	4.28825	4.55474
ALKBH1	ALKBH1_8846_5_2	CTAGCTCAGATCTGTCTACG	0.128189	0.0349204	0.115112	-0.559583	0.03278	9.53687	5.94508	7.91768	4.28825	4.55474
ALKBH1	ALKBH1_8846_5_8	CAGCGGCTACTTGCTCTGAG	0.883283	0.510003	0.462371	-0.322292	0.559817	9.53687	5.94508	7.91768	4.28825	4.55474
ALKBH1	ALKBH1_8846_5_5	AGTCCAGGCGGTAGTAATTC	-0.159352	0.321766	-0.504237	-1.13921	0.26242	9.53687	5.94508	7.91768	4.28825	4.55474
ALKBH1	ALKBH1_8846_5_10	TACCGCCTGGACTCCACACT	0.221307	0.1316	-0.512011	-0.0923915	0.725898	9.53687	5.94508	7.91768	4.28825	4.55474
ALKBH2	ALKBH2_sgALKBH2_4	ACAGCTGGCTCTTCTCCAGT	0.343698	0.850442	0.889708	-0.171895	1.10773	7.56475	27.9977	12.7642	39.7204	15.4873
ALKBH2	ALKBH2_121642_2_15	GGGAATGGAGGCCACTCAGC	1.11775	-0.468244	0.906122	-0.670062	-0.38275	7.56475	27.9977	12.7642	39.7204	15.4873
ALKBH2	ALKBH2_121642_2_3	GCCCGAATGTGCCGCCAGCT	-0.241925	0.511376	0.581515	0.98275	0.776359	7.56475	27.9977	12.7642	39.7204	15.4873
ALKBH2	ALKBH2_121642_2_20	GGACAGATTCCTGGTGAAAG	0.755819	-0.867448	-0.887983	-0.0909869	-0.430395	7.56475	27.9977	12.7642	39.7204	15.4873
ALKBH2	ALKBH2_121642_2_2	GGACTGTGTAACTGCAGTCC	1.30557	-0.183045	0.426845	0.0330211	1.59671	7.56475	27.9977	12.7642	39.7204	15.4873
ALKBH2	ALKBH2_sgALKBH2_10	AAGGAAGAGGCCCAGGAGAG	1.1005	1.1903	0.464808	-0.726257	1.124	7.56475	27.9977	12.7642	39.7204	15.4873
ALKBH2	ALKBH2_sgALKBH2_7	GAGGAGACAAAGAAAGCACA	0.486782	0.41658	0.256852	1.27595	1.67123	7.56475	27.9977	12.7642	39.7204	15.4873
ALKBH2	ALKBH2_121642_2_12	GCACATTCGGGCTGAGGGCC	0.368233	-0.43408	0.669314	-0.190944	0.471636	7.56475	27.9977	12.7642	39.7204	15.4873
ALKBH2	ALKBH2_sgALKBH2_5	GAAGAGCCAGCTGTGTTGGG	-0.259912	0.499935	0.351321	0.814938	0.361809	7.56475	27.9977	12.7642	39.7204	15.4873
ALKBH2	ALKBH2_121642_2_8	GCTCCTCCTGCTTCCTCAAA	1.49767	0.224715	0.672828	0.108877	0.996913	7.56475	27.9977	12.7642	39.7204	15.4873
ALKBH2	ALKBH2_sgALKBH2_9	AAAGCACAAGGAAGAGGCCC	1.3537	1.10443	0.158186	-0.179044	0.284015	7.56475	27.9977	12.7642	39.7204	15.4873
ALKBH2	ALKBH2_121642_2_4	GCCAGCTAGGGCCTGCTGAG	-0.729494	0.591711	0.859513	0.299609	1.0518	7.56475	27.9977	12.7642	39.7204	15.4873
ALKBH2	ALKBH2_sgALKBH2_1	GGACAGGATGGACAGATTCC	0.445622	0.469423	0.595687	0.482035	-0.292779	7.56475	27.9977	12.7642	39.7204	15.4873
ALKBH2	ALKBH2_sgALKBH2_8	ACAAAGAAAGCACAAGGAAG	0.765362	0.606213	-0.170364	-0.281568	-0.151671	7.56475	27.9977	12.7642	39.7204	15.4873
ALKBH2	ALKBH2_121642_2_13	CCCTAGCTGGCGGCACATTC	-0.234753	-0.868892	0.11792	0.422997	0.14796	7.56475	27.9977	12.7642	39.7204	15.4873
ALKBH2	ALKBH2_sgALKBH2_6	TTGTCTCCTCCCAACACAGC	-0.667743	-0.35189	-0.504472	0.441616	-0.00954072	7.56475	27.9977	12.7642	39.7204	15.4873
ALKBH2	ALKBH2_sgALKBH2_2	TGGACAGATTCCTGGTGAAA	0.556301	0.0800395	0.313415	0.654483	-0.436712	7.56475	27.9977	12.7642	39.7204	15.4873
ALKBH2	ALKBH2_sgALKBH2_3	CAGGAGGAGCAAGAGCCAAC	1.19872	0.495585	1.4586	0.564645	1.29962	7.56475	27.9977	12.7642	39.7204	15.4873
ALKBH2	ALKBH2_121642_2_14	ACTCAGCAGGCCCTAGCTGG	-0.51962	0.211624	0.021744	-0.252104	-0.0352374	7.56475	27.9977	12.7642	39.7204	15.4873
ALKBH2	ALKBH2_121642_2_11	TGCAGTTACACAGTCCTGTT	0.823282	0.313062	0.1945	-0.0445952	0.40652	7.56475	27.9977	12.7642	39.7204	15.4873
ALKBH3	ALKBH3_sgALKBH3_1	AAGACGGCGAGCCCGAGTTC	-0.744642	0.501178	1.64044	1.92463	1.91036	12.3301	12.1886	13.6444	17.3164	22.9844
ALKBH3	ALKBH3_sgALKBH3_2	GAGCCCGAGTTCAGGGAGCC	1.03181	1.29268	0.968286	1.84505	0.324809	12.3301	12.1886	13.6444	17.3164	22.9844
ALKBH3	ALKBH3_221120_6_3	AGCTTTGTCAAGATGTTCCC	-0.254576	0.309008	-0.357481	0.540824	-0.0471214	12.3301	12.1886	13.6444	17.3164	22.9844
ALKBH3	ALKBH3_221120_6_4	GTTCCCTGGAAACAGAGGAC	0.612019	-0.120193	-0.727381	-0.511773	0.995126	12.3301	12.1886	13.6444	17.3164	22.9844
ALKBH3	ALKBH3_sgALKBH3_7	AGGTCTGGCCAGGCTTCTGG	-1.02021	-0.0483964	-0.227606	-2.11433	-1.19227	12.3301	12.1886	13.6444	17.3164	22.9844
ALKBH3	ALKBH3_221120_6_6	ATGCCAGTCCTCTGTTTCCA	0.3995	0.755885	1.01549	0.447015	0.816883	12.3301	12.1886	13.6444	17.3164	22.9844
ALKBH3	ALKBH3_sgALKBH3_9	GCTCTTTGTTCTTCCAGGTC	0.459856	0.592829	-0.60525	0.828743	0.477531	12.3301	12.1886	13.6444	17.3164	22.9844
ALKBH3	ALKBH3_221120_5_1	GAAATCAGCCTGTCACCCAC	-0.0875199	-0.0671199	1.37022	0.085977	1.03923	12.3301	12.1886	13.6444	17.3164	22.9844
ALKBH3	ALKBH3_sgALKBH3_10	ATGATGCTCTTTGTTCTTCC	0.242132	0.85668	0.905666	1.20137	1.03654	12.3301	12.1886	13.6444	17.3164	22.9844
ALKBH3	ALKBH3_221120_6_5	TCTTTCACGTCAACAAAGCC	0.841514	1.10629	0.921182	0.310517	0.497974	12.3301	12.1886	13.6444	17.3164	22.9844
ALKBH3	ALKBH3_sgALKBH3_5	GTGGAGATGGCTCTTAGCAG	-0.797866	-0.609433	-0.325934	0.318011	-0.70687	12.3301	12.1886	13.6444	17.3164	22.9844
ALKBH3	ALKBH3_sgALKBH3_3	AGCCAGGCCATTGCTCAGCC	0.454542	0.721133	1.28143	0.441021	1.06639	12.3301	12.1886	13.6444	17.3164	22.9844
ALKBH3	ALKBH3_sgALKBH3_8	TTGTTCTTCCAGGTCTGGCC	1.15034	1.24526	2.21335	0.49528	1.442	12.3301	12.1886	13.6444	17.3164	22.9844
ALKBH3	ALKBH3_sgALKBH3_6	AGCCATCTCCACCAGAAGCC	0.442429	-0.242526	0.893926	0.830984	1.54707	12.3301	12.1886	13.6444	17.3164	22.9844
ALKBH3	ALKBH3_221120_2_3	TGCCTGGCTGAGCAATGGCC	0.10406	0.143768	0.531059	0.481667	0.225337	12.3301	12.1886	13.6444	17.3164	22.9844
ALKBH3	ALKBH3_221120_3_2	ACCAGAAGCCTGGCCAGACC	0.430122	0.679503	1.07447	0.81993	0.367667	12.3301	12.1886	13.6444	17.3164	22.9844
ALKBH3	ALKBH3_221120_4_1	TACTCAATCACTCGTGGCTC	0.972194	0.0358556	0.0148168	0.344879	0.820568	12.3301	12.1886	13.6444	17.3164	22.9844
ALKBH3	ALKBH3_221120_6_2	TTGACGTGAAAGAAGCTGAC	0.864367	0.423623	0.815652	0.508701	0.27041	12.3301	12.1886	13.6444	17.3164	22.9844
ALKBH3	ALKBH3_221120_6_1	CCCAGGGTCTGTTTGTATCC	-0.422868	-0.282458	-0.463016	-0.74166	-0.900449	12.3301	12.1886	13.6444	17.3164	22.9844
ALKBH3	ALKBH3_sgALKBH3_4	ATTCTTGCCTGGCTGAGCAA	-0.413823	0.331641	0.153161	0.0451984	0.670718	12.3301	12.1886	13.6444	17.3164	22.9844
ALKBH5	ALKBH5_54890_1_29	GGACGAGTGCGCCAAGATCG	-0.0150427	0.0471131	-0.128352	1.1106	-0.771459	36.0555	23.5157	37.5717	17.8738	67.8711
ALKBH5	ALKBH5_54890_1_28	CCAGATGCGCCTCTTCAGCC	0.811247	-0.133051	0.579685	0.825088	0.533082	36.0555	23.5157	37.5717	17.8738	67.8711
ALKBH5	ALKBH5_sgALKBH5_10	GTAAGGTTCGGCGGCAGCGG	-0.493296	0.644802	-0.603671	-1.00072	-1.21442	36.0555	23.5157	37.5717	17.8738	67.8711
ALKBH5	ALKBH5_sgALKBH5_1	GTAGCCGCTGGCGGCCGCCA	0.821516	0.887692	0.677452	0.660489	0.803475	36.0555	23.5157	37.5717	17.8738	67.8711
ALKBH5	ALKBH5_54890_1_68	GTCAATGCGGGCCTCGATCT	-1.15578	-0.468323	-0.758652	-1.17228	-0.324135	36.0555	23.5157	37.5717	17.8738	67.8711
ALKBH5	ALKBH5_sgALKBH5_2	CAGGTCCGTGTAGCCGCTGG	-0.22933	-1.32734	-1.44737	-0.560678	-0.55879	36.0555	23.5157	37.5717	17.8738	67.8711
ALKBH5	ALKBH5_54890_1_21	GACGTCCCGGGACAACTATA	-1.00649	-0.0180189	0.0120379	0.528499	0.15667	36.0555	23.5157	37.5717	17.8738	67.8711
ALKBH5	ALKBH5_54890_1_30	GATCGAGGCCCGCATTGACG	0.242197	-0.738032	-0.109833	-0.172721	-0.918813	36.0555	23.5157	37.5717	17.8738	67.8711
ALKBH5	ALKBH5_sgALKBH5_9	TTCGGCGGCAGCGGCGGCTG	-0.0333361	0.0585501	-0.957491	-0.666288	-1.55688	36.0555	23.5157	37.5717	17.8738	67.8711
ALKBH5	ALKBH5_sgALKBH5_6	GTCCCGGGACAACTATAAGG	-0.680578	-1.11344	-1.40356	-1.0626	-0.929078	36.0555	23.5157	37.5717	17.8738	67.8711
ALKBH5	ALKBH5_54890_1_23	GCCGAACCTTACCCTGTGTC	-1.72562	-1.4984	-0.679271	-0.497676	-0.436097	36.0555	23.5157	37.5717	17.8738	67.8711
ALKBH5	ALKBH5_sgALKBH5_8	TGCGGCTGCGGCGGCTACGG	-1.25335	-0.585899	-0.926491	-1.35174	-0.670942	36.0555	23.5157	37.5717	17.8738	67.8711
ALKBH5	ALKBH5_54890_1_61	TGCCCGCCTTATAGTTGTCC	-0.475014	-1.1343	-1.28354	-1.51551	-1.11124	36.0555	23.5157	37.5717	17.8738	67.8711
ALKBH5	ALKBH5_sgALKBH5_4	AGCTCAAGTCCATGACGTCC	0.948688	-0.278103	-0.173178	0.0709994	-0.162167	36.0555	23.5157	37.5717	17.8738	67.8711
ALKBH5	ALKBH5_sgALKBH5_5	ATAGTTGTCCCGGGACGTCA	-1.13895	-1.47113	-1.2321	-1.43041	-0.901889	36.0555	23.5157	37.5717	17.8738	67.8711
ALKBH5	ALKBH5_54890_1_65	CCTCATAGTCGCTGCGCTCG	-2.08983	-1.31932	-2.02508	-1.74202	-1.57697	36.0555	23.5157	37.5717	17.8738	67.8711
ALKBH5	ALKBH5_sgALKBH5_7	ACAACTATAAGGCGGGCAGC	1.09151	0.840456	0.521514	0.217863	0.567977	36.0555	23.5157	37.5717	17.8738	67.8711
ALKBH5	ALKBH5_sgALKBH5_3	TGGACTTGAGCTTCTCACGC	-0.568212	0.127402	-0.0969379	0.363303	0.171201	36.0555	23.5157	37.5717	17.8738	67.8711
ALKBH5	ALKBH5_54890_1_64	CTGATACTTGCGCTTGGCCC	-1.36202	-1.69707	-1.04423	-0.625213	-0.579318	36.0555	23.5157	37.5717	17.8738	67.8711
ALKBH5	ALKBH5_54890_1_63	CCCGGACACAGGGTAAGGTT	-0.806649	-0.128372	-0.426189	-0.660776	-0.151221	36.0555	23.5157	37.5717	17.8738	67.8711
ALKBH8	ALKBH8_91801_4_1	TCTTCTACTACCATGAGTCC	-2.39331	-1.9566	0.642856	-0.33275	-2.13708	6.80693	7.78749	2.40477	9.04149	14.5234
ALKBH8	ALKBH8_sgALKBH8_7	AGCCTGGTTGTTGCCAATGG	-1.02674	-2.08229	-0.419628	0.0994664	-0.36496	6.80693	7.78749	2.40477	9.04149	14.5234
ALKBH8	ALKBH8_91801_4_3	AGCCTTACCACCAGGACTCA	0.889471	-0.882995	-0.340707	0.661058	-0.186728	6.80693	7.78749	2.40477	9.04149	14.5234
ALKBH8	ALKBH8_sgALKBH8_8	GTTGTTGCCAATGGTGGTTT	-0.411768	-3.07114	-0.186507	0.175882	-0.985283	6.80693	7.78749	2.40477	9.04149	14.5234
ALKBH8	ALKBH8_91801_3_5	GAGTCGGAACCAGCTGCTCC	0.0920229	-2.08559	0.521043	-0.262868	-0.686649	6.80693	7.78749	2.40477	9.04149	14.5234
ALKBH8	ALKBH8_sgALKBH8_10	GTTTGGGTAATGGTGTGAGT	-2.17033	-2.64675	-1.54745	-0.618372	-2.60964	6.80693	7.78749	2.40477	9.04149	14.5234
ALKBH8	ALKBH8_sgALKBH8_2	AAACTGAGAAGAAGTTCTTA	-0.0368993	-0.493895	0.325801	0.24997	1.15295	6.80693	7.78749	2.40477	9.04149	14.5234
ALKBH8	ALKBH8_sgALKBH8_5	GACAGTATCCTATGCCACTC	0.29577	-1.90702	-0.328349	0.607083	-0.0383086	6.80693	7.78749	2.40477	9.04149	14.5234
ALKBH8	ALKBH8_91801_3_3	AACCACCATTGGCAACAACC	1.56289	-1.40807	0.750037	1.06295	0.933633	6.80693	7.78749	2.40477	9.04149	14.5234
ALKBH8	ALKBH8_91801_8_3	ACTGGCACTGCAATGCCATC	0.324664	-1.00956	-0.314323	-0.0858433	0.145941	6.80693	7.78749	2.40477	9.04149	14.5234
ALKBH8	ALKBH8_91801_3_7	GCCAATGGTGGTTTGGGTAA	0.748131	-0.684161	0.555228	0.560247	0.350158	6.80693	7.78749	2.40477	9.04149	14.5234
ALKBH8	ALKBH8_91801_3_1	GCAAATGAGTACGGCTTGTT	-0.759392	-1.48893	0.968479	0.0692471	0.446316	6.80693	7.78749	2.40477	9.04149	14.5234
ALKBH8	ALKBH8_91801_4_4	TAGTGCAGTGGAAGGAGTTG	0.415082	-1.93378	0.0157744	-0.272219	0.0630173	6.80693	7.78749	2.40477	9.04149	14.5234
ALKBH8	ALKBH8_sgALKBH8_3	ATGTCTCAGCAAAGTATGCT	0.144772	-1.33849	0.594012	0.367119	-0.287473	6.80693	7.78749	2.40477	9.04149	14.5234
ALKBH8	ALKBH8_sgALKBH8_6	TTAGGTCACCTGAGTGGCAT	-0.0704416	-1.53001	0.240491	0.0166682	-0.636169	6.80693	7.78749	2.40477	9.04149	14.5234
ALKBH8	ALKBH8_sgALKBH8_4	CATACTTTGCTGAGACATGA	0.0243093	-2.51101	0.575694	0.844264	0.0147054	6.80693	7.78749	2.40477	9.04149	14.5234
ALKBH8	ALKBH8_91801_4_5	TTTGGTTTCCCATAGTGCAG	-0.523967	-1.61278	0.210407	-0.272822	-0.0366093	6.80693	7.78749	2.40477	9.04149	14.5234
ALKBH8	ALKBH8_sgALKBH8_9	ACCATTACCCAAACCACCAT	-0.543566	-1.37759	0.943278	-0.386701	0.417515	6.80693	7.78749	2.40477	9.04149	14.5234
ALKBH8	ALKBH8_sgALKBH8_1	TGAGTTTGTAATTACTTTGA	0.263666	-1.51115	-0.307206	0.267173	0.553624	6.80693	7.78749	2.40477	9.04149	14.5234
ALKBH8	ALKBH8_91801_4_2	AGTCCTGGTGGTAAGGCTTG	-0.59354	-0.833125	-0.492521	-1.00528	-1.0327	6.80693	7.78749	2.40477	9.04149	14.5234
ALPI	ALPI_248_4_7	GTGGCTGTGGCTGCGCTGTC	-0.184732	-0.0342741	0.265176	0.605696	-0.396561	0.0146903	0	0	0	0
ALPI	ALPI_248_5_9	GCGGTTCACTGTGTGTGCGT	-0.488228	-0.292779	-0.855916	-2.07122	-0.682081	0.0146903	0	0	0	0
ALPI	ALPI_248_5_5	CATGCCTGCCTCAGCCCGCC	0.310678	1.44157	0.797266	-0.681509	-0.55631	0.0146903	0	0	0	0
ALPI	ALPI_248_3_2	GACAGCCACCAGGATCCTAA	1.07213	1.12963	0.517267	1.53118	0.95599	0.0146903	0	0	0	0
ALPI	ALPI_248_5_4	CACACACAGTGAACCGCAAC	0.736912	0.93298	0.990561	1.12505	0.701178	0.0146903	0	0	0	0
ALPI	ALPI_248_4_14	GCTCACCTGCTTGCTTGGCC	0.47165	0.786692	0.529726	0.347157	0.987169	0.0146903	0	0	0	0
ALPI	ALPI_248_3_1	TGCCCACGGTGACAGCCACC	0.089514	0.886134	0.913873	0.765753	0.83899	0.0146903	0	0	0	0
ALPI	ALPI_248_3_3	GGGCAGAAGAATGGCAAACT	0.481541	-0.197968	1.78428	1.5694	2.16725	0.0146903	0	0	0	0
ALPI	ALPI_248_4_13	TTGCTTGGCCCGGTTCATCA	-0.0571408	0.0148214	-0.251409	0.268248	0.0592083	0.0146903	0	0	0	0
ALPI	ALPI_248_4_2	AGACAGCGCAGCCACAGCCA	0.00739463	0.363805	1.1797	-0.0499101	0.530644	0.0146903	0	0	0	0
ALPI	ALPI_248_2_11	ACTCACCATCGCCCAGGAAG	1.23167	1.02551	0.51019	0.591502	1.36804	0.0146903	0	0	0	0
ALPI	ALPI_248_2_9	TTCTTGGCGACCTTCTGGAT	-0.709475	-0.440338	-0.225237	-0.78997	-0.0312656	0.0146903	0	0	0	0
ALPI	ALPI_248_3_5	ATCCTGGTGGCTGTCACCGT	0.0635685	-0.297438	0.779505	0.402021	0.200727	0.0146903	0	0	0	0
ALPI	ALPI_248_4_1	GACATACAATGTGGACAGAC	2.24852	1.71067	1.80835	1.62966	1.74334	0.0146903	0	0	0	0
ALPI	ALPI_248_4_9	CAAGCCGATGGTCTGGAAGT	-0.275314	0.476422	0.211819	-0.64788	0.0629483	0.0146903	0	0	0	0
ALPI	ALPI_248_5_10	CAGCATCTGAGTACCAGTTG	-0.229394	0.33287	0.134491	-0.765211	0.120172	0.0146903	0	0	0	0
ALPI	ALPI_248_2_8	CTGGATGGGCTGCAGCTTCT	1.41026	1.50101	1.46455	0.841361	1.59754	0.0146903	0	0	0	0
ALPI	ALPI_248_3_4	CATGGACCGCTTCCCATACC	0.0439851	-0.259276	-0.0308073	-0.317854	-0.199262	0.0146903	0	0	0	0
ALPI	ALPI_248_5_2	TAGGAGTGGTGACCACCACA	-0.378601	0.583939	0.040138	-0.113619	-0.522001	0.0146903	0	0	0	0
ALPI	ALPI_248_3_8	CCCTTACCTTGGACAGAGCC	1.10089	1.26684	0.796132	0.99535	1.11044	0.0146903	0	0	0	0
ALPP	ALPP_ENSG00000163283_16_2488	GCTCAAGGACGGCGCCCGGC	1.39937	1.21495	1.22582	1.33948	0.713858	0.460633	0.014746	0.250822	0.0192272	0.297501
ALPP	ALPP_ENSG00000163283_11_3110	TGGCCGTCTCCAGCAGCAGC	0.543535	1.09518	1.57183	0.834666	1.13725	0.460633	0.014746	0.250822	0.0192272	0.297501
ALPP	ALPP_ENSG00000163283_17_2488	GATGTTACCGAGAGCGAGAG	1.2974	0.440616	1.9541	-0.722149	1.20852	0.460633	0.014746	0.250822	0.0192272	0.297501
ALPP	ALPP_250_7_1	CACAGGGTGCCCGGTATGTG	0.907003	0.210166	0.0488764	-0.726935	-0.382858	0.460633	0.014746	0.250822	0.0192272	0.297501
ALPP	ALPP_250_1_15	CAGCATGTCTGGAGGGCAGC	0.684242	0.818887	0.839609	0.91838	1.47016	0.460633	0.014746	0.250822	0.0192272	0.297501
ALPP	ALPP_250_5_1	CTTAGGGAAGTCAGTGGGAG	-0.316769	-0.802671	-0.0815747	0.695136	-0.389796	0.460633	0.014746	0.250822	0.0192272	0.297501
ALPP	ALPP_ENSG00000163283_15_0	CGCGAGGCAGCCGAGGCCCT	0.482655	0.171521	0.407212	0.0815912	-0.262479	0.460633	0.014746	0.250822	0.0192272	0.297501
ALPP	ALPP_ENSG00000163283_12_622	GACAAACATGTGCCAGACAG	-0.120637	0.807622	0.722061	-0.120134	-0.0603973	0.460633	0.014746	0.250822	0.0192272	0.297501
ALPP	ALPP_250_10_12	GCACTCACCGCTCTCGCTCT	0.79485	1.11377	1.14126	0.323916	-0.0245262	0.460633	0.014746	0.250822	0.0192272	0.297501
ALPP	ALPP_ENSG00000163283_12_3110	ACGGGACACTCAGGGAGCAG	0.0902381	-0.405136	-0.878099	-0.132825	-0.449648	0.460633	0.014746	0.250822	0.0192272	0.297501
ALPP	ALPP_ENSG00000163283_13_2488	CGGTCCAGGCTATGTGCTCA	0.244985	0.645279	0.954906	0.348108	0.594454	0.460633	0.014746	0.250822	0.0192272	0.297501
ALPP	ALPP_ENSG00000163283_14_2488	CCAGGCTATGTGCTCAAGGA	0.0766357	-0.190806	1.07324	0.268081	0.21104	0.460633	0.014746	0.250822	0.0192272	0.297501
ALPP	ALPP_ENSG00000163283_11_2488	ACGGTCCTCCTATACGGAAA	0.838903	-0.234627	0.367295	0.654332	0.405324	0.460633	0.014746	0.250822	0.0192272	0.297501
ALPP	ALPP_ENSG00000163283_15_1244	ACTACAGCCAAGGTGGGACC	0.959433	1.22262	0.75372	0.810763	0.181656	0.460633	0.014746	0.250822	0.0192272	0.297501
ALPP	ALPP_ENSG00000163283_1_0	TGCTGCCCTCCAGACATGCT	1.08916	0.440804	0.515082	-0.197115	0.704789	0.460633	0.014746	0.250822	0.0192272	0.297501
ALPP	ALPP_250_3_6	ACAGAGCCACATATGGGAAG	0.566056	-0.133025	0.92093	0.471723	0.446147	0.460633	0.014746	0.250822	0.0192272	0.297501
ALPP	ALPP_ENSG00000163283_12_1244	TACCCAGATGACTACAGCCA	0.808873	1.13237	0.695169	0.79728	0.809738	0.460633	0.014746	0.250822	0.0192272	0.297501
ALPP	ALPP_250_3_4	CATGGACCGCTTCCCATATG	0.129751	0.108566	0.956335	0.811037	0.226756	0.460633	0.014746	0.250822	0.0192272	0.297501
ALPP	ALPP_250_1_6	CTGCTGCCCTCCAGACATGC	1.46591	0.602708	0.445533	0.768551	0.796809	0.460633	0.014746	0.250822	0.0192272	0.297501
ALPP	ALPP_250_1_6	CTGCTGCCCTCCAGACATGC	1.46591	0.602708	0.445533	0.768551	0.796809	0.460633	0.014746	0.250822	0.0192272	0.297501
ALPP	ALPP_250_1_6	CTGCTGCCCTCCAGACATGC	1.46591	0.602708	0.445533	0.768551	0.796809	0.460633	0.014746	0.250822	0.0192272	0.297501
ALPP	ALPP_250_1_6	CTGCTGCCCTCCAGACATGC	1.46591	0.602708	0.445533	0.768551	0.796809	0.460633	0.014746	0.250822	0.0192272	0.297501
ALPP	ALPP_250_1_6	CTGCTGCCCTCCAGACATGC	1.46591	0.602708	0.445533	0.768551	0.796809	0.460633	0.014746	0.250822	0.0192272	0.297501
ALPP	ALPP_250_1_6	CTGCTGCCCTCCAGACATGC	1.46591	0.602708	0.445533	0.768551	0.796809	0.460633	0.014746	0.250822	0.0192272	0.297501
ALPP	ALPP_250_1_6	CTGCTGCCCTCCAGACATGC	1.46591	0.602708	0.445533	0.768551	0.796809	0.460633	0.014746	0.250822	0.0192272	0.297501
ALPP	ALPP_250_1_6	CTGCTGCCCTCCAGACATGC	1.46591	0.602708	0.445533	0.768551	0.796809	0.460633	0.014746	0.250822	0.0192272	0.297501
ALPP	ALPP_250_1_6	CTGCTGCCCTCCAGACATGC	1.46591	0.602708	0.445533	0.768551	0.796809	0.460633	0.014746	0.250822	0.0192272	0.297501
ALPP	ALPP_250_1_6	CTGCTGCCCTCCAGACATGC	1.46591	0.602708	0.445533	0.768551	0.796809	0.460633	0.014746	0.250822	0.0192272	0.297501
ALPP	ALPP_250_1_6	CTGCTGCCCTCCAGACATGC	1.46591	0.602708	0.445533	0.768551	0.796809	0.460633	0.014746	0.250822	0.0192272	0.297501
ALPP	ALPP_250_1_6	CTGCTGCCCTCCAGACATGC	1.46591	0.602708	0.445533	0.768551	0.796809	0.460633	0.014746	0.250822	0.0192272	0.297501
ALPP	ALPP_250_1_6	CTGCTGCCCTCCAGACATGC	1.46591	0.602708	0.445533	0.768551	0.796809	0.460633	0.014746	0.250822	0.0192272	0.297501
ALPP	ALPP_250_1_6	CTGCTGCCCTCCAGACATGC	1.46591	0.602708	0.445533	0.768551	0.796809	0.460633	0.014746	0.250822	0.0192272	0.297501
ALPP	ALPP_250_1_6	CTGCTGCCCTCCAGACATGC	1.46591	0.602708	0.445533	0.768551	0.796809	0.460633	0.014746	0.250822	0.0192272	0.297501
ALPP	ALPP_250_1_6	CTGCTGCCCTCCAGACATGC	1.46591	0.602708	0.445533	0.768551	0.796809	0.460633	0.014746	0.250822	0.0192272	0.297501
ALPPL2	ALPPL2_251_2_9	CGTCACCCAGGAAGATGATG	-1.86306	-0.0088741	-0.0213972	0.0284968	-1.22607	0.00787406	0	0.668379	0	0.0160195
ALPPL2	ALPPL2_ENSG00000163283_14_3110	GCCCCAGGGACGGGACACTC	-0.0419731	-1.48266	-0.770532	1.2444	-0.28112	0.00787406	0	0.668379	0	0.0160195
ALPPL2	ALPPL2_251_7_1	CGCAGGGTGCCCGGTACGTG	-1.80506	-0.548966	-1.29633	-0.776078	-1.54527	0.00787406	0	0.668379	0	0.0160195
ALPPL2	ALPPL2_ENSG00000163283_20_1866	ACCATGGTCATCATGAAAGC	0.783479	-0.486887	0.798388	-0.30494	0.306496	0.00787406	0	0.668379	0	0.0160195
ALPPL2	ALPPL2_251_11_42	AGCAAGGTCCCTGCCAGCAG	0.828711	0.580184	-0.199464	-0.24206	0.143414	0.00787406	0	0.668379	0	0.0160195
ALPPL2	ALPPL2_251_3_4	GCCTGAGACCTTCCTGGCCA	1.63783	0.846649	1.31417	0.581153	1.30089	0.00787406	0	0.668379	0	0.0160195
ALPPL2	ALPPL2_ENSG00000163283_19_1244	AAGGTGGGACCAGGCTGGAC	0.829935	1.18104	0.146585	0.719157	-0.341504	0.00787406	0	0.668379	0	0.0160195
ALPPL2	ALPPL2_251_3_6	TCCATGGCCAGGAAGGTCTC	0.557927	0.28396	0.94508	0.120668	0.613369	0.00787406	0	0.668379	0	0.0160195
ALPPL2	ALPPL2_ENSG00000163283_16_1244	CAGCCAAGGTGGGACCAGGC	1.20579	-0.211053	0.628029	1.47698	0.465405	0.00787406	0	0.668379	0	0.0160195
ALPPL2	ALPPL2_ENSG00000163283_14_1244	CAGATGACTACAGCCAAGGT	0.149275	0.694517	0.697111	0.277163	0.221907	0.00787406	0	0.668379	0	0.0160195
ALPPL2	ALPPL2_251_10_6	CGGCGCCCGGCCGGATGTTA	0.142026	0.603605	0.641585	0.214209	0.141675	0.00787406	0	0.668379	0	0.0160195
ALPPL2	ALPPL2_251_3_5	CATGGACCGCTTCCCGTACG	0.920405	0.0843622	0.56741	-0.00346085	0.614028	0.00787406	0	0.668379	0	0.0160195
ALPPL2	ALPPL2_251_5_6	GGATGCCGACGTGCCTGCCT	1.86208	1.41824	1.04489	0.864224	0.484591	0.00787406	0	0.668379	0	0.0160195
ALPPL2	ALPPL2_251_3_8	ACAGAGCCACGTACGGGAAG	1.5587	1.08397	1.06801	1.04105	0.553057	0.00787406	0	0.668379	0	0.0160195
ALPPL2	ALPPL2_ENSG00000163283_13_1244	CCAGATGACTACAGCCAAGG	0.563765	1.01883	0.305812	0.507461	0.916187	0.00787406	0	0.668379	0	0.0160195
ALPPL2	ALPPL2_251_2_10	TGGCTCACTCACCGTCACCC	1.51234	1.02159	0.875646	0.745191	1.17699	0.00787406	0	0.668379	0	0.0160195
ALPPL2	ALPPL2_251_1_2	CCGACTGCTTCCAGACATGC	0.31289	0.445048	-0.100064	0.556953	0.314834	0.00787406	0	0.668379	0	0.0160195
ALPPL2	ALPPL2_251_7_5	ACGGGTCCAGGGAAGCCTGC	0.099947	0.473301	0.42245	0.101421	-0.253056	0.00787406	0	0.668379	0	0.0160195
ALPPL2	ALPPL2_251_5_2	TGGGAGTGGTAACCACCACA	0.412209	0.912261	0.431364	0.336027	0.443839	0.00787406	0	0.668379	0	0.0160195
ALPPL2	ALPPL2_251_1_7	CCTGCATGTCTGGAAGCAGT	0.203346	0.0224418	-0.274177	0.156789	-0.378495	0.00787406	0	0.668379	0	0.0160195
ALS2	ALS2_57679_4_28	GCTGGTTGGCTACTGCACAC	-0.218238	-0.304709	-0.0239508	-1.65319	-0.591352	10.718	7.39821	10.4322	10.3432	18.9112
ALS2	ALS2_57679_2_1	TCTTTGAGTCCATCGGTCAG	0.061599	0.23689	0.484316	-0.322158	-1.11775	10.718	7.39821	10.4322	10.3432	18.9112
ALS2	ALS2_57679_4_44	GTGGTGCTTCAAGTTGCCTG	0.619379	-0.69632	0.555743	0.172706	-0.236764	10.718	7.39821	10.4322	10.3432	18.9112
ALS2	ALS2_57679_2_2	GGAGTGTTCCCACTGACCGA	-0.056708	-0.00695469	-0.128038	-0.511411	-0.345302	10.718	7.39821	10.4322	10.3432	18.9112
ALS2	ALS2_57679_5_13	GTGGCTGCTACTTATGAAGC	-0.415092	-0.153046	-0.389239	0.400077	-0.679467	10.718	7.39821	10.4322	10.3432	18.9112
ALS2	ALS2_57679_4_23	AATGAGACCCAACTGACAAC	0.991967	0.279135	0.651303	0.298712	1.43519	10.718	7.39821	10.4322	10.3432	18.9112
ALS2	ALS2_57679_9_7	GTTATATTACAGTGGCCGAC	-0.0616273	0.442249	0.696567	-0.223519	0.572323	10.718	7.39821	10.4322	10.3432	18.9112
ALS2	ALS2_57679_4_39	GTAAGAGAGGACTCAGAGCA	0.721436	0.49954	0.337865	0.72903	1.38375	10.718	7.39821	10.4322	10.3432	18.9112
ALS2	ALS2_57679_4_22	TTGCGGCTTTGTCACTGGGA	-1.40574	-0.823619	-0.366516	-0.997237	-1.08661	10.718	7.39821	10.4322	10.3432	18.9112
ALS2	ALS2_57679_3_1	GAACTCCATGTTTCACTCCG	-0.279175	0.504554	0.603909	0.0748239	-0.59162	10.718	7.39821	10.4322	10.3432	18.9112
ALS2	ALS2_57679_4_49	TTTACAGTTGGCGTGTGGCG	0.94796	-0.292652	0.285376	-0.819622	0.92437	10.718	7.39821	10.4322	10.3432	18.9112
ALS2	ALS2_57679_4_46	CCCAGTGACAAAGCCGCAAA	0.0133931	0.580845	0.0955562	0.20176	0.0392281	10.718	7.39821	10.4322	10.3432	18.9112
ALS2	ALS2_57679_4_42	GACAGTCATTGTTGCCCATT	0.212776	-0.228151	0.32454	-0.166228	-0.317223	10.718	7.39821	10.4322	10.3432	18.9112
ALS2	ALS2_57679_4_24	CCTGACTGCTAACAAAGGGC	0.509741	0.269641	-0.15267	0.394931	-0.221354	10.718	7.39821	10.4322	10.3432	18.9112
ALS2	ALS2_57679_4_53	AATGGTGTCGCGTACATGTG	-1.75589	-0.407421	-0.511742	-0.975615	-0.755193	10.718	7.39821	10.4322	10.3432	18.9112
ALS2	ALS2_57679_5_9	CAGGGAAGAACAGGTTAAAC	0.497155	0.420354	0.355273	0.644735	0.078674	10.718	7.39821	10.4322	10.3432	18.9112
ALS2	ALS2_57679_7_3	GTAATCCATCTGGAGGCAGG	0.0209786	-0.542297	0.195667	-0.258543	-0.253371	10.718	7.39821	10.4322	10.3432	18.9112
ALS2	ALS2_57679_3_7	CTGGTCCATATCTGGCAGGC	1.13331	-0.425064	0.610799	0.076677	0.974621	10.718	7.39821	10.4322	10.3432	18.9112
ALS2	ALS2_57679_4_31	CTCCACTGGTCCACTTCTCC	0.183089	0.317668	0.313453	0.108245	0.49945	10.718	7.39821	10.4322	10.3432	18.9112
ALS2	ALS2_57679_4_27	TTGGTTCCGGCACATACTGC	-0.600919	-0.0100796	-0.482994	0.181959	-0.408759	10.718	7.39821	10.4322	10.3432	18.9112
ALS2CL	ALS2CL_259173_5_3	CGAGTGGCTGGTGGAGGGCC	-1.15052	0.176254	-0.34032	-0.0625882	-2.53713	2.75414	2.71568	2.87759	2.69252	0.11386
ALS2CL	ALS2CL_259173_1_10	AAGGGCGCGCGTCTGCGGAC	-1.02816	-0.328475	-0.971991	-1.4575	1.08478	2.75414	2.71568	2.87759	2.69252	0.11386
ALS2CL	ALS2CL_259173_5_8	GCGCTGCGGCAGCTGCTTTC	0.758186	-0.225774	0.790862	-0.240208	0.0837661	2.75414	2.71568	2.87759	2.69252	0.11386
ALS2CL	ALS2CL_259173_1_6	GCGCCCTTACCTGAGCGCTG	0.614866	0.935371	-0.995441	0.940971	-0.760566	2.75414	2.71568	2.87759	2.69252	0.11386
ALS2CL	ALS2CL_259173_5_5	GGCTCGGTGGGCGCATCGCT	-0.515577	-0.113319	0.275849	-0.738922	-0.148313	2.75414	2.71568	2.87759	2.69252	0.11386
ALS2CL	ALS2CL_259173_3_4	GACTCCAGACCGGTGGAGTC	0.485981	0.260696	1.02066	0.640996	0.880269	2.75414	2.71568	2.87759	2.69252	0.11386
ALS2CL	ALS2CL_259173_3_11	GCAGGAGAGGCTGCGTTACC	0.135332	-0.285223	0.571923	1.18659	-0.579248	2.75414	2.71568	2.87759	2.69252	0.11386
ALS2CL	ALS2CL_259173_1_1	TTACGAGGGACTCGGACGGC	1.60026	1.14021	0.574947	0.636292	-0.0523392	2.75414	2.71568	2.87759	2.69252	0.11386
ALS2CL	ALS2CL_259173_5_2	GCACGTGATGGGCGAGTGGC	0.66603	-0.00316798	0.482925	-0.126179	0.360251	2.75414	2.71568	2.87759	2.69252	0.11386
ALS2CL	ALS2CL_259173_2_9	GAGGCCCTGAGTCCGGCACC	-0.0385333	0.617194	1.25758	0.170114	0.84384	2.75414	2.71568	2.87759	2.69252	0.11386
ALS2CL	ALS2CL_259173_3_8	AGGTGCTGACCGTGTACTGC	-0.0273184	0.669715	-0.192874	0.144982	0.0937582	2.75414	2.71568	2.87759	2.69252	0.11386
ALS2CL	ALS2CL_259173_1_7	GCCCAGCTCCTTGGTCCCGG	-1.14899	-0.126271	-0.125388	0.116349	-0.648271	2.75414	2.71568	2.87759	2.69252	0.11386
ALS2CL	ALS2CL_259173_1_2	GATGACTGCCGCCGGGACCA	0.0344581	0.712049	0.124025	0.0834032	0.136955	2.75414	2.71568	2.87759	2.69252	0.11386
ALS2CL	ALS2CL_259173_4_2	CACCACCATGCAGCTTGTGT	0.163069	-0.449387	-0.628116	0.325896	-0.328277	2.75414	2.71568	2.87759	2.69252	0.11386
ALS2CL	ALS2CL_259173_5_9	ACACGCAGCGAGTACTGGCG	0.945499	0.608948	0.322892	0.45568	0.203985	2.75414	2.71568	2.87759	2.69252	0.11386
ALS2CL	ALS2CL_259173_1_12	CAACCACAGCGCTCAGGTAA	0.499982	1.09212	0.686843	0.487331	0.620364	2.75414	2.71568	2.87759	2.69252	0.11386
ALS2CL	ALS2CL_259173_1_11	TCAGGTAAGGGCGCGACGAA	-0.0164245	-0.18786	-0.770788	-0.331856	-0.592051	2.75414	2.71568	2.87759	2.69252	0.11386
ALS2CL	ALS2CL_259173_3_10	TTACCCGGACTCCACCGGTC	-0.54544	-0.0814006	0.232949	0.472331	-0.111576	2.75414	2.71568	2.87759	2.69252	0.11386
ALX1	ALX1_sgALX1_9	GGAGAGGACCTCGCCCTGTC	1.89121	0.338192	0.290635	0.894496	0.552444	0	0	0	0	2.56074
ALX1	ALX1_sgALX1_7	GCGCACGTGATGCTCGGCGC	0.995159	0.0620931	0.170791	0.572231	0.0381791	0	0	0	0	2.56074
ALX1	ALX1_sgALX1_8	CTCCAAGCGCACGTGATGCT	1.42665	0.70635	1.09496	-0.326662	0.973269	0	0	0	0	2.56074
ALX1	ALX1_8092_1_9	CGCACGTGATGCTCGGCGCG	-0.255539	0.271975	0.89192	0.745167	-0.0490618	0	0	0	0	2.56074
ALX1	ALX1_8092_1_7	GTCTCCATAACGTGCTCCAG	1.00123	-0.200623	-0.264494	-0.0940447	0.155258	0	0	0	0	2.56074
ALX1	ALX1_sgALX1_5	GTCTGCAGGCAAATGCGTGC	0.231217	-1.2114	-0.16817	-0.270849	0.252608	0	0	0	0	2.56074
ALX1	ALX1_sgALX1_6	GGCAAATGCGTGCAGGCCTT	-0.0448315	-0.397711	-0.0345058	-0.634237	0.261351	0	0	0	0	2.56074
ALX1	ALX1_sgALX1_4	GGAGCACGTTATGGAGACGC	1.27814	-0.284241	-0.091124	1.06407	0.288436	0	0	0	0	2.56074
ALX1	ALX1_sgALX1_10	GCTGCTGTCCTGACAGGGCG	-0.0342334	-0.121657	0.321401	0.599463	-0.0871942	0	0	0	0	2.56074
ALX1	ALX1_8092_2_11	TTCTCTTGCATCCCTTTCAC	-0.88025	-0.852476	-0.979393	-1.18912	-1.23131	0	0	0	0	2.56074
ALX1	ALX1_8092_1_4	CGCCGAGCATCACGTGCGCT	0.466368	1.02385	0.323387	-0.302113	1.05114	0	0	0	0	2.56074
ALX1	ALX1_sgALX1_1	TTTACTCGGAGGGCTCTTGA	-0.0898614	0.390969	-0.277612	-0.484296	-0.0815157	0	0	0	0	2.56074
ALX1	ALX1_sgALX1_3	AGGTCCTCTGGAGCACGTTA	0.448231	-0.273499	0.688854	0.800307	0.731812	0	0	0	0	2.56074
ALX1	ALX1_sgALX1_2	CATGGGCGCAGGAGGTCCTC	-0.931751	-0.63336	-0.651496	-0.790995	-0.656499	0	0	0	0	2.56074
ALX1	ALX1_8092_2_4	AAGGGAGAGCTGGATGAACT	1.53241	0.991128	1.24821	0.630377	0.486143	0	0	0	0	2.56074
ALX1	ALX1_8092_1_8	TGCAGACGCTTTGCTGTAAA	1.25932	0.761126	0.577568	0.548636	0.829798	0	0	0	0	2.56074
ALX1	ALX1_8092_2_2	CTCCGAATGTCTCCCGTGAA	0.827922	0.37673	0.582968	0.956435	0.290035	0	0	0	0	2.56074
ALX1	ALX1_8092_2_9	CTATTCAGTTCGGTGTGAAG	-0.750844	-0.498591	-0.131172	-0.568942	-0.508638	0	0	0	0	2.56074
ALX1	ALX1_8092_2_1	CACCGAACTGAATAGAGCTA	0.571683	-0.283781	-0.071591	-0.159192	0.069921	0	0	0	0	2.56074
ALX1	ALX1_8092_2_10	TCCCTTTCACGGGAGACATT	0.647712	-0.112434	-0.311753	-0.190309	-0.31864	0	0	0	0	2.56074
ALX3	ALX3_257_2_21	GACGGGCCCTCTAACTTGCA	1.41707	0.426361	0.838165	1.03561	1.9777	0.814258	0.891753	0.417183	1.54818	0.441916
ALX3	ALX3_257_1_16	ACTGCGCGCCTTTCCGCGTG	-0.160508	0.20205	-0.193557	-0.318585	-0.675107	0.814258	0.891753	0.417183	1.54818	0.441916
ALX3	ALX3_sgALX3_7	GGAGCCCTACCTCCCAGAGC	-0.977085	-0.449252	-0.35531	-0.318264	-0.9396	0.814258	0.891753	0.417183	1.54818	0.441916
ALX3	ALX3_sgALX3_6	GGGCCCGCAGGCCGGAAAGC	0.780328	0.68061	0.917583	1.01483	0.180784	0.814258	0.891753	0.417183	1.54818	0.441916
ALX3	ALX3_sgALX3_3	GACGAGCCTCCGGGCCCGCA	1.19977	-1.06657	0.347882	-0.170024	0.317703	0.814258	0.891753	0.417183	1.54818	0.441916
ALX3	ALX3_sgALX3_1	GCGGAAAGGCGCGCAGTGCT	0.585976	0.0634709	0.0959821	-0.108243	0.224276	0.814258	0.891753	0.417183	1.54818	0.441916
ALX3	ALX3_sgALX3_2	CACTGCGCGCCTTTCCGCGT	0.0841758	-0.336657	-0.150634	0.338181	0.11004	0.814258	0.891753	0.417183	1.54818	0.441916
ALX3	ALX3_sgALX3_5	GCCGGAAAGCGGGTCAGCCG	0.29936	-0.00220819	0.348395	0.859513	-0.858086	0.814258	0.891753	0.417183	1.54818	0.441916
ALX3	ALX3_sgALX3_4	GTGCAGGTGAGGCGCAGCGG	-1.61341	-1.26213	-1.7296	-1.4078	-0.474737	0.814258	0.891753	0.417183	1.54818	0.441916
ALX3	ALX3_257_2_15	TGTGTATGCCCGGGAGCAGC	0.653798	-0.436195	-0.315273	-0.923095	-0.8105	0.814258	0.891753	0.417183	1.54818	0.441916
ALX3	ALX3_257_1_15	TGACCCGCTTTCCGGCCTGC	0.109938	0.106134	0.831736	1.1565	1.28505	0.814258	0.891753	0.417183	1.54818	0.441916
ALX3	ALX3_257_1_1	CGTAGAAGTGGCCGCCGTTG	-1.50527	-0.625732	-0.285993	-0.950336	-0.669244	0.814258	0.891753	0.417183	1.54818	0.441916
ALX3	ALX3_sgALX3_8	CTTGGCCGGCTCTGGGAGGT	-0.154346	0.147114	-0.0601067	0.218359	-0.117909	0.814258	0.891753	0.417183	1.54818	0.441916
ALX3	ALX3_sgALX3_9	CAGGTACTTGGCGGGCGGCT	-0.170207	0.078129	0.253334	0.0369634	0.461091	0.814258	0.891753	0.417183	1.54818	0.441916
ALX3	ALX3_257_1_11	AACGGCGGCCACTTCTACGA	0.399089	-0.188228	0.660523	0.999863	0.540052	0.814258	0.891753	0.417183	1.54818	0.441916
ALX3	ALX3_257_2_4	TGCTCCCGGGCATACACATC	0.146637	-0.942801	0.0600328	-0.860754	0.123751	0.814258	0.891753	0.417183	1.54818	0.441916
ALX3	ALX3_257_2_2	CCTCAGTCAGGTCTGTGCGC	-1.62515	-2.63143	-1.94238	-1.54743	-1.71572	0.814258	0.891753	0.417183	1.54818	0.441916
ALX3	ALX3_257_2_12	CAAGTTAGAGGGCCCGTCTC	-0.623894	-1.07241	-0.0638376	-0.708453	-0.227954	0.814258	0.891753	0.417183	1.54818	0.441916
ALX3	ALX3_sgALX3_10	TCCTGCAGGTACTTGGCGGG	-0.504119	-1.07514	-0.536712	-0.910217	-0.947526	0.814258	0.891753	0.417183	1.54818	0.441916
ALX3	ALX3_257_2_22	CTGCCCTTGGACTGCCGAGG	0.811562	-0.0827034	0.539347	-0.0538132	0.0625694	0.814258	0.891753	0.417183	1.54818	0.441916
ALX4	ALX4_sgALX4_1	CGTCTCTTACTGCGAGTCGC	0.878028	0.575501	0.194812	1.14872	-2.08447	0.0164523	0.0419734	0.0879102	0.0177792	0.288745
ALX4	ALX4_60529_1_10	GCCGTAACGGGCCCGGCTCT	0.46708	-0.0332904	0.919608	0.857892	0.410552	0.0164523	0.0419734	0.0879102	0.0177792	0.288745
ALX4	ALX4_60529_1_26	GCCAAGAGCCGGGCCCGTTA	-0.741278	0.166177	-0.937904	-0.0750294	-0.053318	0.0164523	0.0419734	0.0879102	0.0177792	0.288745
ALX4	ALX4_60529_1_9	CCTGCTGCCCAGCGCCGTAA	0.776489	-0.0418838	0.937526	-0.109416	0.264448	0.0164523	0.0419734	0.0879102	0.0177792	0.288745
ALX4	ALX4_sgALX4_9	GTTCGGCACAACTTTCCTGT	-0.0209899	-0.428593	0.474673	0.64355	-0.415022	0.0164523	0.0419734	0.0879102	0.0177792	0.288745
ALX4	ALX4_60529_1_24	CCGCATCTTTACTTGCAGCG	0.300504	-0.305697	1.01637	-0.182945	0.326438	0.0164523	0.0419734	0.0879102	0.0177792	0.288745
ALX4	ALX4_60529_1_15	CCCTCCCGACTCTGCGACAC	-0.0301571	0.00329358	0.916771	0.414705	0.344024	0.0164523	0.0419734	0.0879102	0.0177792	0.288745
ALX4	ALX4_60529_1_12	GTGCTTTGGCGGCGGCCGAC	0.88909	0.618814	1.13907	0.649002	1.39557	0.0164523	0.0419734	0.0879102	0.0177792	0.288745
ALX4	ALX4_sgALX4_2	CGAGTCGCCGGCCGCTGCCA	0.703041	0.772724	0.732844	1.03048	0.734322	0.0164523	0.0419734	0.0879102	0.0177792	0.288745
ALX4	ALX4_sgALX4_4	CATGGACGCCTACTACAGCC	-0.033346	-0.217736	0.559021	0.42534	1.05767	0.0164523	0.0419734	0.0879102	0.0177792	0.288745
ALX4	ALX4_sgALX4_3	GTAGTAGGCGTCCATGGCAG	-1.76772	-1.20498	0.00646583	-0.952492	-0.545918	0.0164523	0.0419734	0.0879102	0.0177792	0.288745
ALX4	ALX4_60529_1_29	TTTCCCGGAGGCGACAAGTT	-0.0911114	0.375372	-0.234915	1.18477	1.6489	0.0164523	0.0419734	0.0879102	0.0177792	0.288745
ALX4	ALX4_sgALX4_10	TCGGCCGCCGCCAAAGCACA	-0.559974	0.23396	0.593343	0.542787	0.523091	0.0164523	0.0419734	0.0879102	0.0177792	0.288745
ALX4	ALX4_sgALX4_7	CCGGTGTCGCAGAGTCGGGA	-0.347643	-0.431095	-0.476297	-0.385369	-0.0631705	0.0164523	0.0419734	0.0879102	0.0177792	0.288745
ALX4	ALX4_60529_1_25	CCGTTACGGCGCTGGGCAGC	0.420991	0.172569	0.615596	0.211468	0.375165	0.0164523	0.0419734	0.0879102	0.0177792	0.288745
ALX4	ALX4_sgALX4_5	CTGCGACACCGGGCTGTAGT	-0.407222	-0.019899	0.255106	0.00519707	0.0157999	0.0164523	0.0419734	0.0879102	0.0177792	0.288745
ALX4	ALX4_sgALX4_6	ACAGCCCGGTGTCGCAGAGT	0.392715	0.067095	0.254705	-0.358669	0.181689	0.0164523	0.0419734	0.0879102	0.0177792	0.288745
ALX4	ALX4_sgALX4_8	TGTGCCGAACTTGTCGCCTC	1.14803	1.01594	1.21262	0.628928	0.616965	0.0164523	0.0419734	0.0879102	0.0177792	0.288745
ALX4	ALX4_60529_1_6	TAAAGATGCGGTTGCGCGGG	0.198995	-1.22478	-0.727546	-0.984328	-1.02315	0.0164523	0.0419734	0.0879102	0.0177792	0.288745
ALX4	ALX4_60529_1_14	CCTCCGGGAAATGCCCTAAA	0.474275	0.245122	0.281507	0.463876	0.651584	0.0164523	0.0419734	0.0879102	0.0177792	0.288745
ALYREF	ALYREF_10189_3_7	GCTGTGCACTATGATCGCTC	-2.54251	-1.6465	-2.42836	-2.20851	-3.99809	207.931	137.895	81.3412	112.106	231.719
ALYREF	ALYREF_10189_1_7	CGGAGGCGGCAGGAACCGAC	-3.10848	-3.20334	-4.09043	-7.37514	-5.30808	207.931	137.895	81.3412	112.106	231.719
ALYREF	ALYREF_sgALYREF_2	GGCCATGGCGGGCGCGGAAT	-3.04074	-0.553954	-0.953819	-1.04059	-2.10822	207.931	137.895	81.3412	112.106	231.719
ALYREF	ALYREF_10189_2_6	AGTGGCTTCGGCGGTGGTGC	-1.18666	-1.35459	-0.131742	-1.933	-1.5338	207.931	137.895	81.3412	112.106	231.719
ALYREF	ALYREF_10189_1_9	GCGCGAGTGAATCGAGGCGG	-0.983481	-1.41832	-1.84775	-1.6382	-1.81809	207.931	137.895	81.3412	112.106	231.719
ALYREF	ALYREF_sgALYREF_10	GATGGCCGGCCGGTTCCGGA	-1.15733	0.207884	-0.574676	-1.0836	-1.26136	207.931	137.895	81.3412	112.106	231.719
ALYREF	ALYREF_sgALYREF_1	GCGGGCGCGGAATCGGGCAT	-2.37374	-2.06887	-1.97722	-1.49485	-1.21693	207.931	137.895	81.3412	112.106	231.719
ALYREF	ALYREF_sgALYREF_6	GCCTCGATTCACTCGCGCGG	-1.12743	-1.68718	-1.63037	-1.63102	-0.449793	207.931	137.895	81.3412	112.106	231.719
ALYREF	ALYREF_sgALYREF_3	TTTGTCGGCCATGGCGGGCG	-1.78474	-1.96827	-1.84214	-1.99431	-1.99059	207.931	137.895	81.3412	112.106	231.719
ALYREF	ALYREF_10189_1_1	CTCACCCTGCTGTAGGGCGC	-1.72721	-1.93073	-2.74359	-1.78883	-3.35533	207.931	137.895	81.3412	112.106	231.719
ALYREF	ALYREF_10189_3_5	AGACGTGCACTTTGAGCGGA	-0.261401	-0.24749	-0.0957308	-0.000699617	0.463474	207.931	137.895	81.3412	112.106	231.719
ALYREF	ALYREF_10189_3_6	GATCGCTCTGGTCGCAGCTT	-1.59743	-1.68562	-1.07505	-2.1418	-0.658484	207.931	137.895	81.3412	112.106	231.719
ALYREF	ALYREF_10189_2_3	CTGGTGTCCAATCTGGATTT	-2.56239	-2.71351	-2.22866	-2.27285	-1.51781	207.931	137.895	81.3412	112.106	231.719
ALYREF	ALYREF_10189_2_2	AAGATCGTGCTGCCACTTGT	-1.36868	-1.48101	-1.53168	-3.07458	-1.75865	207.931	137.895	81.3412	112.106	231.719
ALYREF	ALYREF_sgALYREF_5	CTGAACCGGAGCCAGCGAGG	-0.710971	-1.99807	-0.719448	-1.08062	-0.757715	207.931	137.895	81.3412	112.106	231.719
ALYREF	ALYREF_sgALYREF_9	CGGGCCCATCCGGAACCGGC	-0.279073	-1.72608	-0.658603	-0.746263	-1.44598	207.931	137.895	81.3412	112.106	231.719
ALYREF	ALYREF_sgALYREF_8	ATCGAGGCGGCGGGCCCATC	-1.18641	-0.52365	-0.211773	-1.60798	-0.0458568	207.931	137.895	81.3412	112.106	231.719
ALYREF	ALYREF_sgALYREF_4	ACGACATCATTAAACTGAAC	-2.10996	-3.31086	-1.63577	-2.24534	-0.748416	207.931	137.895	81.3412	112.106	231.719
AMBRA1	AMBRA1_55626_9_38	GAGGTTGCGGAGCGTGTTGC	-2.15676	-0.0840622	-0.806725	0.274646	0.724149	7.79128	7.51594	10.516	5.38447	6.70145
AMBRA1	AMBRA1_55626_5_4	GAGTACGGCGGTGTCCAATC	-0.660071	0.91698	-0.342456	0.219316	0.504018	7.79128	7.51594	10.516	5.38447	6.70145
AMBRA1	AMBRA1_55626_9_30	GCATGGATTCCGCCTCAGAG	1.20073	1.91871	-0.146197	1.72	0.42275	7.79128	7.51594	10.516	5.38447	6.70145
AMBRA1	AMBRA1_55626_9_44	TGCGTTGACGAGGCCTGCTC	-0.799011	0.728677	-0.989847	-0.49829	-0.340779	7.79128	7.51594	10.516	5.38447	6.70145
AMBRA1	AMBRA1_55626_5_8	TTGGACACCGCCGTACTCCA	0.672644	3.1092	1.54777	1.55843	1.57277	7.79128	7.51594	10.516	5.38447	6.70145
AMBRA1	AMBRA1_55626_8_4	AATTGTGGAGGAGAGGCGTC	-0.450094	0.541951	-0.410279	-0.35136	0.496528	7.79128	7.51594	10.516	5.38447	6.70145
AMBRA1	AMBRA1_55626_3_6	ACCCGGTGGATGAAATGGGA	-0.3834	2.09324	-0.296956	0.630118	-0.19236	7.79128	7.51594	10.516	5.38447	6.70145
AMBRA1	AMBRA1_55626_8_8	TGCAATCACAGCCAGTTCGC	-0.765696	-0.0519095	-0.984737	-0.974009	-0.537172	7.79128	7.51594	10.516	5.38447	6.70145
AMBRA1	AMBRA1_55626_9_31	AGTTCAGACTGAGTACTGTC	-0.020686	1.77809	-0.0418274	1.21809	0.917275	7.79128	7.51594	10.516	5.38447	6.70145
AMBRA1	AMBRA1_55626_9_29	CACCGAAGAGGCACTGGTTC	1.74673	1.05804	0.727987	1.53744	0.945617	7.79128	7.51594	10.516	5.38447	6.70145
AMBRA1	AMBRA1_55626_9_74	CTACCCGCCGCTCTTTGGGA	-2.99537	-1.57419	-1.95032	-2.4613	-2.22536	7.79128	7.51594	10.516	5.38447	6.70145
AMBRA1	AMBRA1_55626_4_1	TGGGCTGAAGGCCAATAAGA	-1.17735	0.923221	-0.222423	-0.558424	-0.285713	7.79128	7.51594	10.516	5.38447	6.70145
AMBRA1	AMBRA1_55626_9_75	ACGCTCCGCAACCTCAGTCT	-0.696546	0.703444	0.104044	0.395379	0.157585	7.79128	7.51594	10.516	5.38447	6.70145
AMBRA1	AMBRA1_55626_4_3	TCCACGCTCTACCTTCTTAT	0.241395	1.04908	-0.649169	0.067361	-0.0126329	7.79128	7.51594	10.516	5.38447	6.70145
AMBRA1	AMBRA1_55626_6_5	ATCAGCAGGAGCTGAGCCGT	-0.66615	1.50994	-0.0737899	-0.297682	-0.25822	7.79128	7.51594	10.516	5.38447	6.70145
AMBRA1	AMBRA1_55626_9_71	TGACAGGATCTGAGTGGACC	-0.973367	1.01637	0.244825	0.298506	0.979951	7.79128	7.51594	10.516	5.38447	6.70145
AMBRA1	AMBRA1_55626_3_9	ATGCTGTCCGGATACTCTGG	-0.745781	0.761601	-0.980437	-0.402844	-0.643912	7.79128	7.51594	10.516	5.38447	6.70145
AMBRA1	AMBRA1_55626_6_9	TCGACGGGAACCCTTTGCTG	-1.54998	0.47854	-1.78071	-0.304356	-0.479753	7.79128	7.51594	10.516	5.38447	6.70145
AMZ2	AMZ2_ENSG00000196704_7_2736	TTCCATATTGTAGGCTCTCT	0.259118	0.701628	-0.327753	-0.219762	-0.285441	48.4015	38.2012	37.5123	62.598	45.4423
AMZ2	AMZ2_ENSG00000196704_3_2736	GGTAAATACTGGTAATGTGC	-0.700917	-0.964083	-1.11978	-0.922131	-1.0169	48.4015	38.2012	37.5123	62.598	45.4423
AMZ2	AMZ2_51321_6_6	GCATGAGGCATGCAAGCCAC	-0.555113	0.138108	0.34271	0.0462639	-0.677144	48.4015	38.2012	37.5123	62.598	45.4423
AMZ2	AMZ2_51321_2_4	GAGATCACTGGCTGGCTGGA	0.891722	1.48926	0.965905	0.686867	0.74196	48.4015	38.2012	37.5123	62.598	45.4423
AMZ2	AMZ2_51321_2_9	ATGCTGCGTTTGTTTGGAGA	-0.259856	-0.0377785	-0.321141	-0.0232246	0.522904	48.4015	38.2012	37.5123	62.598	45.4423
AMZ2	AMZ2_51321_7_6	TTATCCTCGTGACTGTGTTC	0.82061	0.94589	0.585023	0.40499	0.330636	48.4015	38.2012	37.5123	62.598	45.4423
AMZ2	AMZ2_51321_6_2	TGGCTTGCATGCCTCATGCA	-0.816984	0.558633	0.112716	0.507942	0.302426	48.4015	38.2012	37.5123	62.598	45.4423
AMZ2	AMZ2_ENSG00000196704_0_1368	TTTGTTAGATGCAAATAATA	-0.712244	0.0428734	0.317378	0.736131	0.534311	48.4015	38.2012	37.5123	62.598	45.4423
AMZ2	AMZ2_51321_7_4	GAAACCCGTGGAAGCCTTTA	0.880267	-0.212198	0.709134	0.77083	0.745747	48.4015	38.2012	37.5123	62.598	45.4423
AMZ2	AMZ2_51321_6_1	TTGGACTGCGACACTGCCAG	1.26584	1.56877	0.910321	0.387073	1.16705	48.4015	38.2012	37.5123	62.598	45.4423
AMZ2	AMZ2_ENSG00000196704_6_2736	TAAATGTTCTTCCATATTGT	0.534429	-0.199907	0.0306165	-0.141154	0.00163687	48.4015	38.2012	37.5123	62.598	45.4423
AMZ2	AMZ2_51321_6_5	CACAAGTTGCAGTGTGCTGT	0.407568	-0.246912	-0.332368	-0.0736443	-0.574466	48.4015	38.2012	37.5123	62.598	45.4423
AMZ2	AMZ2_51321_7_2	AACTCCAGAACACAGTCACG	0.619787	1.05226	0.494891	0.176764	0.343918	48.4015	38.2012	37.5123	62.598	45.4423
AMZ2	AMZ2_ENSG00000196704_30_2736	TTCCTAGAGAGCCTACAATA	0.487461	0.836807	0.174336	0.76096	1.02229	48.4015	38.2012	37.5123	62.598	45.4423
AMZ2	AMZ2_ENSG00000196704_24_2736	ACATTACCAGTATTTACCAA	-1.30266	-0.380444	-0.182152	-0.874144	-1.43103	48.4015	38.2012	37.5123	62.598	45.4423
AMZ2	AMZ2_51321_3_1	CAGAAACAGGAACTGGTTCT	-0.124411	0.652171	0.345434	0.462736	0.550074	48.4015	38.2012	37.5123	62.598	45.4423
ANAPC1	ANAPC1_ENSG00000153107_10_16917	TGGAGTTCTGGAAGAAGGGT	-2.23894	-3.25844	-2.94152	-4.76082	-2.55913	25.0948	13.3194	25.2817	8.52549	12.5189
ANAPC1	ANAPC1_ENSG00000153107_103_0	GGTGATGTGACCGTGTCTGG	-2.32129	-1.70234	0.131916	-0.827227	-1.96153	25.0948	13.3194	25.2817	8.52549	12.5189
ANAPC1	ANAPC1_sgANAPC1_2	ATGCTGAACATAGTAGGTAA	0.931716	0.031353	0.267967	1.32519	0.548182	25.0948	13.3194	25.2817	8.52549	12.5189
ANAPC1	ANAPC1_sgANAPC1_4	ATGGAGGAGTAATTCTGGAA	-0.0602961	-1.6414	-1.34415	-1.87079	-0.664901	25.0948	13.3194	25.2817	8.52549	12.5189
ANAPC1	ANAPC1_sgANAPC1_9	AAAGCAAGGCCTTCCGAGAC	1.39949	1.19732	-0.00297114	-0.169401	0.372734	25.0948	13.3194	25.2817	8.52549	12.5189
ANAPC1	ANAPC1_sgANAPC1_5	TCTCCAAATAGTAATTCTAA	-1.7682	-2.75197	-2.299	-2.83805	-3.12032	25.0948	13.3194	25.2817	8.52549	12.5189
ANAPC1	ANAPC1_ENSG00000153107_104_0	AATGGTGATGTGACCGTGTC	-1.2657	-0.366054	-0.239951	-1.05556	-0.454632	25.0948	13.3194	25.2817	8.52549	12.5189
ANAPC1	ANAPC1_ENSG00000153107_109_33834	TGCTCGATGCCTGATTTTGT	-0.890753	-1.82753	-0.469889	-0.0445716	-1.18725	25.0948	13.3194	25.2817	8.52549	12.5189
ANAPC1	ANAPC1_ENSG00000153107_11_67668	GAATCCCTCAGTTCTGGAAC	-1.13099	-2.47298	-1.17796	-0.597658	-0.47496	25.0948	13.3194	25.2817	8.52549	12.5189
ANAPC1	ANAPC1_sgANAPC1_1	GACAACGATGATTGCAGCAA	0.792118	-0.621613	-0.860373	-1.34997	-0.59751	25.0948	13.3194	25.2817	8.52549	12.5189
ANAPC1	ANAPC1_64682_45_2	ATGTATGCAGGCAACATCTC	-0.85121	-2.55215	-2.05397	-2.16689	-1.8763	25.0948	13.3194	25.2817	8.52549	12.5189
ANAPC1	ANAPC1_sgANAPC1_10	AAAGATGAGACTCAACATTC	-1.28157	-1.94605	-3.25561	-2.11492	-1.04181	25.0948	13.3194	25.2817	8.52549	12.5189
ANAPC1	ANAPC1_ENSG00000153107_1_84585	AAATGGTCAATACACAGTTC	-1.81699	-4.32414	-4.07844	-3.17617	-2.82942	25.0948	13.3194	25.2817	8.52549	12.5189
ANAPC1	ANAPC1_ENSG00000153107_106_0	AGATTGGCTCCTTTGCTTCT	0.77773	0.734844	0.00293736	-0.0987212	0.24987	25.0948	13.3194	25.2817	8.52549	12.5189
ANAPC1	ANAPC1_sgANAPC1_6	AGACATACACCTACCGTAAC	-1.53913	-3.96179	-3.49613	-4.51896	-2.0697	25.0948	13.3194	25.2817	8.52549	12.5189
ANAPC1	ANAPC1_ENSG00000153107_0_84585	TAATCGTTTCTGTCCACAAA	0.918733	-0.730406	-0.859446	-0.160864	0.328036	25.0948	13.3194	25.2817	8.52549	12.5189
ANAPC1	ANAPC1_sgANAPC1_7	TGTCCATAACAGAGTCACCC	0.204001	0.0611031	-0.417978	1.34672	0.641656	25.0948	13.3194	25.2817	8.52549	12.5189
ANAPC1	ANAPC1_ENSG00000153107_10_67668	TTTGAAGAATCCCTCAGTTC	-1.66131	-3.26127	-2.29445	-1.39363	-1.71939	25.0948	13.3194	25.2817	8.52549	12.5189
ANAPC1	ANAPC1_sgANAPC1_3	TTCTGGAAAGGTGAAGTCAC	-0.531243	-1.42066	-1.56588	-1.35011	-1.49596	25.0948	13.3194	25.2817	8.52549	12.5189
ANAPC1	ANAPC1_sgANAPC1_8	ACTTGTCTCATGAACATGAT	-1.16655	-3.74058	-3.09775	-1.78292	-3.04064	25.0948	13.3194	25.2817	8.52549	12.5189
ANAPC4	ANAPC4_sgANAPC4_5	GGGAGAGAAGCAGCTCCCGC	-3.56465	-4.07906	-4.77567	-3.33259	-3.82628	19.6546	11.3619	9.69347	17.2208	4.93309
ANAPC4	ANAPC4_29945_3_2	TGTCTGGCATGGAGACCAGA	-2.64854	-4.54828	-4.18384	-2.50671	-2.89309	19.6546	11.3619	9.69347	17.2208	4.93309
ANAPC4	ANAPC4_29945_3_1	AGGAAAGGAGGTGACGTGTC	-1.12464	-1.85683	-1.20121	-1.54351	-1.05916	19.6546	11.3619	9.69347	17.2208	4.93309
ANAPC4	ANAPC4_29945_9_1	GTCACAGAAGTCTCTACCAA	-2.11644	-3.00888	-1.68364	-1.24668	-1.80282	19.6546	11.3619	9.69347	17.2208	4.93309
ANAPC4	ANAPC4_29945_2_8	CCCGCTTGGGCGACCAGACC	-2.36891	-4.09877	-3.80657	-3.1443	-4.10708	19.6546	11.3619	9.69347	17.2208	4.93309
ANAPC4	ANAPC4_sgANAPC4_7	AAAGCAATGAGATCCCGCTT	-3.19181	-5.72495	-3.02543	-3.50526	-2.81908	19.6546	11.3619	9.69347	17.2208	4.93309
ANAPC4	ANAPC4_29945_4_1	CTCCAGTTTCCTGTATGCAT	-1.98113	-5.28482	-3.10298	-2.60877	-4.25962	19.6546	11.3619	9.69347	17.2208	4.93309
ANAPC4	ANAPC4_sgANAPC4_2	CTGTTTCCCATCCTTCCGGG	-3.42607	-4.07144	-4.30443	-3.06711	-4.61323	19.6546	11.3619	9.69347	17.2208	4.93309
ANAPC4	ANAPC4_sgANAPC4_6	TCCTGGTCTGGTCGCCCAAG	-4.25476	-4.98159	-3.34899	-3.52485	-4.20143	19.6546	11.3619	9.69347	17.2208	4.93309
ANAPC4	ANAPC4_sgANAPC4_9	TTTGGCCAACACAGCTGGCG	-1.38714	-3.48924	-2.98727	-1.35174	-1.56615	19.6546	11.3619	9.69347	17.2208	4.93309
ANAPC4	ANAPC4_29945_8_2	TAAATCCAGAGCTTCCTCCA	-3.03485	-3.9953	-1.40733	-2.04489	-2.54911	19.6546	11.3619	9.69347	17.2208	4.93309
ANAPC4	ANAPC4_sgANAPC4_3	CTCCCACCACCCGGAAGGAT	-0.706845	-3.38346	-1.05062	-1.39548	-2.56747	19.6546	11.3619	9.69347	17.2208	4.93309
ANAPC4	ANAPC4_sgANAPC4_1	CGGAAGGATGGGAAACAGGT	-1.57822	-3.89754	-2.31342	-1.36504	-1.04993	19.6546	11.3619	9.69347	17.2208	4.93309
ANAPC4	ANAPC4_sgANAPC4_10	ACTCACCTCGCCAGCTGTGT	-3.24019	-3.49103	-2.9911	-3.06775	-1.50124	19.6546	11.3619	9.69347	17.2208	4.93309
ANAPC4	ANAPC4_29945_2_1	CGACCTGTTTCCCATCCTTC	-2.44605	-4.25413	-1.91779	-1.73788	-2.45666	19.6546	11.3619	9.69347	17.2208	4.93309
ANAPC4	ANAPC4_sgANAPC4_4	CTTCTCTCCCACCACCCGGA	-2.88788	-4.94726	-4.50913	-4.22879	-4.75818	19.6546	11.3619	9.69347	17.2208	4.93309
ANAPC4	ANAPC4_sgANAPC4_8	ATTGCTTTGGCCAACACAGC	-3.31511	-3.11182	-3.06448	-3.17118	-2.91938	19.6546	11.3619	9.69347	17.2208	4.93309
ANAPC4	ANAPC4_29945_2_4	CAAGCGGGATCTCATTGCTT	-3.19992	-4.92866	-4.13729	-3.01804	-2.94055	19.6546	11.3619	9.69347	17.2208	4.93309
ANAPC4	ANAPC4_29945_4_2	CTTGGTATCAGCAAGAGCAA	-1.70654	-3.99902	-2.78741	-1.94182	-3.18652	19.6546	11.3619	9.69347	17.2208	4.93309
ANAPC4	ANAPC4_29945_8_1	CTCGTCCTTGGAGGAAGCTC	-1.97427	-1.97865	-2.89623	-0.29831	-2.72373	19.6546	11.3619	9.69347	17.2208	4.93309
ANGPTL4	ANGPTL4_51129_3_11	GGCGGCTGACATTGTGAGCC	1.26043	0.674608	-0.131195	-0.336227	-0.114961	1.15412	0.0353774	0.364698	28.3989	1.42446
ANGPTL4	ANGPTL4_51129_6_4	GCTGCAGTTCTCCGTGCACC	1.73711	1.27463	1.134	0.298509	1.86497	1.15412	0.0353774	0.364698	28.3989	1.42446
ANGPTL4	ANGPTL4_51129_6_12	CACGGAGAACTGCAGCAACT	1.05105	0.941852	0.498861	0.61336	0.814282	1.15412	0.0353774	0.364698	28.3989	1.42446
ANGPTL4	ANGPTL4_51129_1_10	GCGCACGGACTCCTGCAGCT	1.31584	1.6313	1.08034	0.547453	1.12381	1.15412	0.0353774	0.364698	28.3989	1.42446
ANGPTL4	ANGPTL4_51129_1_7	CGCCGTGCTACTGAGCGCTC	-1.2337	-1.2911	-2.1103	-0.817405	-0.649681	1.15412	0.0353774	0.364698	28.3989	1.42446
ANGPTL4	ANGPTL4_51129_1_24	CGGTGGCGGCGCAGAGCATC	-0.0726011	-0.1156	-0.210144	-0.7011	0.86215	1.15412	0.0353774	0.364698	28.3989	1.42446
ANGPTL4	ANGPTL4_51129_5_2	GTAATTCAGAGGCGCCACGA	-0.613337	-0.525406	-0.570298	-0.00235888	0.849257	1.15412	0.0353774	0.364698	28.3989	1.42446
ANGPTL4	ANGPTL4_51129_6_3	TGGCCGTGCAGCTGCGGGAC	0.230784	0.321954	-0.0929749	0.206971	-0.519631	1.15412	0.0353774	0.364698	28.3989	1.42446
ANGPTL4	ANGPTL4_51129_3_7	CCTCTTTCTTCGGGCAGGCT	-0.0984642	0.275024	0.155737	0.421954	0.69532	1.15412	0.0353774	0.364698	28.3989	1.42446
ANGPTL4	ANGPTL4_51129_1_30	CAGCGCGCTCAGCTGACTGC	-0.854784	-0.345845	0.0590554	-0.429549	0.337302	1.15412	0.0353774	0.364698	28.3989	1.42446
ANGPTL4	ANGPTL4_51129_1_26	CGCGGCGACTTGGACTGCAC	-0.23944	-0.0870784	0.461169	0.197711	0.453642	1.15412	0.0353774	0.364698	28.3989	1.42446
ANGPTL4	ANGPTL4_51129_5_1	GAGGCTGGACAGTAATTCAG	-0.381095	0.898897	-0.390025	0.565069	-0.147662	1.15412	0.0353774	0.364698	28.3989	1.42446
ANGPTL4	ANGPTL4_51129_3_10	GTGAGCCGGGTCAACTGGCT	-0.194108	0.0618354	-0.0478274	0.354696	0.259368	1.15412	0.0353774	0.364698	28.3989	1.42446
ANGPTL4	ANGPTL4_51129_2_8	TTTGCAGATGCTGAATTCGC	0.067751	0.230379	0.127441	0.0181005	-0.04158	1.15412	0.0353774	0.364698	28.3989	1.42446
ANGPTL4	ANGPTL4_51129_5_6	CCTTGTAGGCTTCCCAGGGC	-1.1108	-0.560131	-0.916245	-0.907956	-0.701398	1.15412	0.0353774	0.364698	28.3989	1.42446
ANGPTL4	ANGPTL4_51129_1_13	CCGCCTGTCAGGGAACCGAG	-1.75508	-1.01363	-0.679523	-1.19594	-1.29668	1.15412	0.0353774	0.364698	28.3989	1.42446
ANGPTL4	ANGPTL4_51129_3_3	AAGAAAGAGGCTGCCCGAGA	1.02161	-0.110057	0.607121	1.35316	1.32625	1.15412	0.0353774	0.364698	28.3989	1.42446
ANGPTL5	ANGPTL5_253935_9_4	GGCTGGTGGTTTAACGAGTG	-2.38976	-0.79618	-3.47283	-2.68061	-0.84721	0	0.00701415	0.00923566	0.0132805	0.0377535
ANGPTL5	ANGPTL5_253935_9_2	ACCACCAGCCGGTCTTGTTA	-1.87959	-3.98909	-1.87851	-1.777	-1.08632	0	0.00701415	0.00923566	0.0132805	0.0377535
ANGPTL5	ANGPTL5_253935_4_1	GGATGAGCAACAAGCTTCCT	1.14096	-1.40376	-0.0580099	0.861045	1.08695	0	0.00701415	0.00923566	0.0132805	0.0377535
ANGPTL5	ANGPTL5_253935_9_1	ACACTCGTTAAACCACCAGC	-1.15132	-2.38007	-1.86188	-0.392777	-0.13339	0	0.00701415	0.00923566	0.0132805	0.0377535
ANGPTL5	ANGPTL5_253935_9_1	ACACTCGTTAAACCACCAGC	-1.15132	-2.38007	-1.86188	-0.392777	-0.13339	0	0.00701415	0.00923566	0.0132805	0.0377535
ANGPTL5	ANGPTL5_253935_9_1	ACACTCGTTAAACCACCAGC	-1.15132	-2.38007	-1.86188	-0.392777	-0.13339	0	0.00701415	0.00923566	0.0132805	0.0377535
ANGPTL5	ANGPTL5_253935_9_1	ACACTCGTTAAACCACCAGC	-1.15132	-2.38007	-1.86188	-0.392777	-0.13339	0	0.00701415	0.00923566	0.0132805	0.0377535
ANGPTL5	ANGPTL5_253935_9_1	ACACTCGTTAAACCACCAGC	-1.15132	-2.38007	-1.86188	-0.392777	-0.13339	0	0.00701415	0.00923566	0.0132805	0.0377535
ANGPTL5	ANGPTL5_253935_9_1	ACACTCGTTAAACCACCAGC	-1.15132	-2.38007	-1.86188	-0.392777	-0.13339	0	0.00701415	0.00923566	0.0132805	0.0377535
ANGPTL5	ANGPTL5_253935_9_1	ACACTCGTTAAACCACCAGC	-1.15132	-2.38007	-1.86188	-0.392777	-0.13339	0	0.00701415	0.00923566	0.0132805	0.0377535
ANGPTL5	ANGPTL5_253935_9_1	ACACTCGTTAAACCACCAGC	-1.15132	-2.38007	-1.86188	-0.392777	-0.13339	0	0.00701415	0.00923566	0.0132805	0.0377535
ANGPTL5	ANGPTL5_253935_9_1	ACACTCGTTAAACCACCAGC	-1.15132	-2.38007	-1.86188	-0.392777	-0.13339	0	0.00701415	0.00923566	0.0132805	0.0377535
ANGPTL5	ANGPTL5_253935_9_1	ACACTCGTTAAACCACCAGC	-1.15132	-2.38007	-1.86188	-0.392777	-0.13339	0	0.00701415	0.00923566	0.0132805	0.0377535
ANGPTL5	ANGPTL5_253935_9_1	ACACTCGTTAAACCACCAGC	-1.15132	-2.38007	-1.86188	-0.392777	-0.13339	0	0.00701415	0.00923566	0.0132805	0.0377535
ANGPTL5	ANGPTL5_253935_9_1	ACACTCGTTAAACCACCAGC	-1.15132	-2.38007	-1.86188	-0.392777	-0.13339	0	0.00701415	0.00923566	0.0132805	0.0377535
ANGPTL5	ANGPTL5_253935_9_1	ACACTCGTTAAACCACCAGC	-1.15132	-2.38007	-1.86188	-0.392777	-0.13339	0	0.00701415	0.00923566	0.0132805	0.0377535
ANGPTL5	ANGPTL5_253935_9_1	ACACTCGTTAAACCACCAGC	-1.15132	-2.38007	-1.86188	-0.392777	-0.13339	0	0.00701415	0.00923566	0.0132805	0.0377535
ANGPTL5	ANGPTL5_253935_9_1	ACACTCGTTAAACCACCAGC	-1.15132	-2.38007	-1.86188	-0.392777	-0.13339	0	0.00701415	0.00923566	0.0132805	0.0377535
ANGPTL5	ANGPTL5_253935_9_1	ACACTCGTTAAACCACCAGC	-1.15132	-2.38007	-1.86188	-0.392777	-0.13339	0	0.00701415	0.00923566	0.0132805	0.0377535
ANGPTL5	ANGPTL5_253935_9_6	CGCCCTGCATGCCTGGTCAA	0.541086	-2.43654	0.216251	-0.207379	0.871842	0	0.00701415	0.00923566	0.0132805	0.0377535
ANGPTL5	ANGPTL5_253935_2_1	AATAAGAGTGAGGCTTGGGA	-0.702397	-2.51966	0.765397	-0.195512	0.267223	0	0.00701415	0.00923566	0.0132805	0.0377535
ANGPTL5	ANGPTL5_253935_9_7	TTCCCAGGTGATGCATTCCG	0.194731	-1.64074	0.562384	-0.370427	0.339915	0	0.00701415	0.00923566	0.0132805	0.0377535
ANGPTL5	ANGPTL5_ENSG00000187151_0_14768	TACATTTAAGAATAAGAGTG	1.16418	-2.79482	-0.467551	0.0358986	1.09936	0	0.00701415	0.00923566	0.0132805	0.0377535
ANGPTL5	ANGPTL5_ENSG00000187151_0_0	GAAACAGATTTAATCTTGAC	0.170522	-1.7306	0.0447888	-0.12622	-0.605277	0	0.00701415	0.00923566	0.0132805	0.0377535
ANGPTL5	ANGPTL5_ENSG00000187151_0_3692	AGCCACATACAGCATAAAAC	0.735419	-1.9988	-0.300411	0.416511	0.979062	0	0.00701415	0.00923566	0.0132805	0.0377535
ANGPTL5	ANGPTL5_253935_6_1	AATGGGTAGCTAGATCCTTC	-0.174889	-1.73053	-0.103315	-0.476802	-0.586689	0	0.00701415	0.00923566	0.0132805	0.0377535
ANGPTL5	ANGPTL5_253935_9_5	TCCATAACAAGACCGGCTGG	-0.382639	-2.17314	-0.557577	-0.416973	-1.01952	0	0.00701415	0.00923566	0.0132805	0.0377535
ANGPTL5	ANGPTL5_253935_8_1	ATGCACTTAGGACGGTATTC	-0.52534	-1.57765	0.923232	-0.0421278	0.0831396	0	0.00701415	0.00923566	0.0132805	0.0377535
ANGPTL5	ANGPTL5_253935_9_3	TCACAGACTGACCATTGACC	1.33442	-2.99784	0.304239	-0.0508948	-0.256952	0	0.00701415	0.00923566	0.0132805	0.0377535
ANGPTL5	ANGPTL5_253935_5_1	TGTGACTGAACAGGTCTGTG	0.105587	-2.9118	0.398129	-0.193265	0.0697861	0	0.00701415	0.00923566	0.0132805	0.0377535
ANGPTL5	ANGPTL5_253935_7_3	TGGATTACAGAGGAGGTGGA	1.61298	-1.20065	1.225	0.717912	0.955622	0	0.00701415	0.00923566	0.0132805	0.0377535
ANK1	ANK1_286_7_5	GGTGCGCGACGACGTTCTCA	0.881631	-0.687162	-0.341911	-0.0631988	0.732461	0.00831121	0.0895535	3.56669	0.00737209	0.255208
ANK1	ANK1_286_7_11	GTCGCGCACCTCATCAACTA	0.725034	0.437706	0.739288	-0.643349	0.320263	0.00831121	0.0895535	3.56669	0.00737209	0.255208
ANK1	ANK1_286_7_3	CGTTGCGGGCCGCGATGTGC	-1.65498	-1.22669	-0.22285	-1.07189	-0.558463	0.00831121	0.0895535	3.56669	0.00737209	0.255208
ANK1	ANK1_286_2_2	GGGCATGCCGGTCTTTCAGC	-0.356386	-0.247535	0.500877	-0.0677668	-0.118894	0.00831121	0.0895535	3.56669	0.00737209	0.255208
ANK1	ANK1_286_8_4	GGAGCAACTGGGCCACGTTG	0.759582	0.437925	1.32128	1.20675	1.13164	0.00831121	0.0895535	3.56669	0.00737209	0.255208
ANK1	ANK1_286_7_2	CCGTGCGCGTGTCGTCGTTG	-1.18876	-0.798895	-0.0937116	-0.43758	-1.6001	0.00831121	0.0895535	3.56669	0.00737209	0.255208
ANK1	ANK1_286_7_8	CGACGACACGCGCACGGCTG	0.0765584	0.367707	0.154517	0.803384	0.243957	0.00831121	0.0895535	3.56669	0.00737209	0.255208
ANK1	ANK1_286_1_11	GTGACCCGCCATGGCTCAAG	0.226601	0.283254	-0.496661	-0.118725	-0.0291929	0.00831121	0.0895535	3.56669	0.00737209	0.255208
ANK1	ANK1_286_5_4	CGGCTAGAGCAGCGATGTGC	0.414215	0.0455982	0.579412	0.152916	0.554152	0.00831121	0.0895535	3.56669	0.00737209	0.255208
ANK1	ANK1_286_1_1	CTACCTTCTTCTTTCGGTCA	-0.116818	0.190176	0.0418459	-0.205737	-0.100327	0.00831121	0.0895535	3.56669	0.00737209	0.255208
ANK1	ANK1_286_5_5	GTCCGGGAGCTTGTCAACTA	-0.00247984	-0.1634	0.520645	1.2109	0.0198818	0.00831121	0.0895535	3.56669	0.00737209	0.255208
ANK1	ANK1_286_5_7	CATCGCTGCTCTAGCCGGGC	0.353736	0.451287	0.934615	0.951902	0.686107	0.00831121	0.0895535	3.56669	0.00737209	0.255208
ANK1	ANK1_286_8_5	CGTAGTGAGCCGCAATGTGC	-1.4333	-1.16847	-0.760209	-1.07393	-0.171321	0.00831121	0.0895535	3.56669	0.00737209	0.255208
ANK1	ANK1_286_9_4	CTGCACATCGCCTCCCGCAG	0.0219656	0.308968	-0.37549	-0.671559	0.161623	0.00831121	0.0895535	3.56669	0.00737209	0.255208
ANK1	ANK1_286_7_10	TCATCAACTACGGCACCAAG	0.126287	0.425404	0.50462	0.377322	0.956305	0.00831121	0.0895535	3.56669	0.00737209	0.255208
ANK1	ANK1_286_7_12	CTGGCGGTAGCCCTGCAGCA	1.32012	0.241956	0.553845	0.477317	1.00509	0.00831121	0.0895535	3.56669	0.00737209	0.255208
ANK1	ANK1_286_7_4	CCTTGGTGCCGTAGTTGATG	-0.338677	-0.60973	-0.996523	-0.55163	-0.566211	0.00831121	0.0895535	3.56669	0.00737209	0.255208
ANK1	ANK1_286_1_10	CATCGAGGCGCAGGCCCTCC	0.159399	0.181107	0.411361	0.5265	0.402912	0.00831121	0.0895535	3.56669	0.00737209	0.255208
ANK1	ANK1_286_8_7	TCACTACGAGAACCTCAACG	1.01825	0.621891	0.323372	0.883538	0.0655687	0.00831121	0.0895535	3.56669	0.00737209	0.255208
ANK1	ANK1_286_8_1	CTGTGGTGTGAAATTGACGC	-0.939273	-0.351276	-0.451315	-0.899125	-1.04796	0.00831121	0.0895535	3.56669	0.00737209	0.255208
ANK2	ANK2_287_13_9	CAGGTGCCTTGTGCTGTAAC	1.28709	1.25245	0.499927	0.952874	0.210052	0.186243	2.31172	0.0158107	0.413859	1.71714
ANK2	ANK2_287_13_14	GGAGTTTGGTTACACGGTAG	-0.00201076	-0.500566	1.02592	-0.021665	0.10167	0.186243	2.31172	0.0158107	0.413859	1.71714
ANK2	ANK2_287_13_8	GGTGCTTCACACATTCCACG	-0.330638	0.716275	0.0253	0.586364	0.050014	0.186243	2.31172	0.0158107	0.413859	1.71714
ANK2	ANK2_287_13_13	GGCCACAGTGCGCAGCAACG	-1.54768	-0.289693	0.501793	0.774005	-0.214641	0.186243	2.31172	0.0158107	0.413859	1.71714
ANK2	ANK2_287_8_15	AAGCAGAAGTGCGGCAGATT	0.163462	0.889759	1.37622	1.30781	2.21413	0.186243	2.31172	0.0158107	0.413859	1.71714
ANK2	ANK2_287_3_8	CGCCTGTACAGACCACTAGC	-1.2322	0.120851	0.1992	-2.33294	-0.270403	0.186243	2.31172	0.0158107	0.413859	1.71714
ANK2	ANK2_287_3_7	AGCGGGTATGCACTTACTGG	-0.952825	-0.376733	-0.826176	0.0228542	-0.654312	0.186243	2.31172	0.0158107	0.413859	1.71714
ANK2	ANK2_287_10_2	ATGTGCAGCTATGTGCAAAG	-0.916537	-0.635093	0.202106	-1.37206	-0.170225	0.186243	2.31172	0.0158107	0.413859	1.71714
ANK2	ANK2_287_4_1	TTCCTCCGTGCTGCCAGAGC	0.51871	0.721611	0.825212	0.414182	0.735855	0.186243	2.31172	0.0158107	0.413859	1.71714
ANK2	ANK2_287_3_2	TACCCGCTAGTGGTCTGTAC	-0.25997	-0.481875	-0.633171	-0.235517	-0.346013	0.186243	2.31172	0.0158107	0.413859	1.71714
ANK2	ANK2_287_3_3	GTACAGGCGGCACGGTTTGA	-0.187116	-1.32202	-0.55128	-0.637785	-0.0970793	0.186243	2.31172	0.0158107	0.413859	1.71714
ANK2	ANK2_287_12_4	CTTCGTGCAGCACAGTGAAG	-0.209783	-0.361734	0.0423936	0.811026	-0.375301	0.186243	2.31172	0.0158107	0.413859	1.71714
ANK2	ANK2_287_8_9	CCGCCTGGTTGTGTCCTTGC	0.66339	-0.377505	-0.401442	-1.43205	-0.324117	0.186243	2.31172	0.0158107	0.413859	1.71714
ANK2	ANK2_287_5_1	TGGACTCAACGCTCTCCATC	0.786057	0.934199	1.37382	1.08773	1.01382	0.186243	2.31172	0.0158107	0.413859	1.71714
ANK2	ANK2_287_3_5	AGTTCAACGGCAGTAGTCAG	0.707873	0.694171	0.422311	0.62039	0.572397	0.186243	2.31172	0.0158107	0.413859	1.71714
ANK2	ANK2_287_12_2	ACGAAGTGGGCATGACCAAG	-0.353015	-0.132821	0.34689	0.168373	0.327789	0.186243	2.31172	0.0158107	0.413859	1.71714
ANK2	ANK2_287_12_3	CCAAGTGGTGGAACTTCTGT	-0.307782	-0.272246	0.0702571	0.358468	0.107298	0.186243	2.31172	0.0158107	0.413859	1.71714
ANK2	ANK2_287_13_12	CAGCAACGTGGAGGGCTGTC	0.903285	0.595411	0.673381	0.472082	0.840293	0.186243	2.31172	0.0158107	0.413859	1.71714
ANK2	ANK2_287_8_7	CAGCTCTGCATATTGCCGCT	0.895624	0.137396	0.771075	0.490007	1.09754	0.186243	2.31172	0.0158107	0.413859	1.71714
ANK2	ANK2_287_8_13	CTAGCGGCAATATGCAGAGC	-0.308033	-0.882033	-0.270788	-0.139082	-0.356554	0.186243	2.31172	0.0158107	0.413859	1.71714
ANKLE2	ANKLE2_sgANKLE2_7	CTGTGCGGTGGCTGGTGCGG	-1.44753	-0.311159	-1.9432	-0.507869	-0.880942	29.0881	23.8324	25.297	31.5362	24.7084
ANKLE2	ANKLE2_sgANKLE2_8	CGGTGGCTGGTGCGGCGGCT	-0.0887489	-0.599665	-0.477847	-0.673809	-0.454964	29.0881	23.8324	25.297	31.5362	24.7084
ANKLE2	ANKLE2_sgANKLE2_1	GGCGATGCTGTGGCCGCGGC	-0.639456	-0.185952	-0.280266	-0.309945	-0.462603	29.0881	23.8324	25.297	31.5362	24.7084
ANKLE2	ANKLE2_sgANKLE2_6	GCTGATCGCTGTGCGGTGGC	0.0640062	-1.21838	-0.129309	0.198411	-0.325208	29.0881	23.8324	25.297	31.5362	24.7084
ANKLE2	ANKLE2_sgANKLE2_10	GCCGCGCTTGGCGGAGGAAC	-0.22961	-0.438148	-1.3647	-1.39462	-1.04343	29.0881	23.8324	25.297	31.5362	24.7084
ANKLE2	ANKLE2_23141_2_9	GACACCGACACCTACAGAGC	-2.06631	-2.92862	-0.928729	-1.49499	-1.83925	29.0881	23.8324	25.297	31.5362	24.7084
ANKLE2	ANKLE2_23141_2_1	GCTGGGACGTCCTCATACAC	-2.07531	-3.27764	-2.44867	-2.24031	-2.23141	29.0881	23.8324	25.297	31.5362	24.7084
ANKLE2	ANKLE2_sgANKLE2_3	GCGCTGGCCTGGGAGCTGCT	0.90292	-0.186759	0.472978	0.237019	0.577652	29.0881	23.8324	25.297	31.5362	24.7084
ANKLE2	ANKLE2_sgANKLE2_5	CGGTGCTGCTGATCGCTGTG	0.275387	0.184022	0.0976398	-0.312064	1.09528	29.0881	23.8324	25.297	31.5362	24.7084
ANKLE2	ANKLE2_23141_2_11	GGGCCTGAATCCTCCAGAGG	-3.24772	-3.23405	-3.87173	-3.81213	-2.87341	29.0881	23.8324	25.297	31.5362	24.7084
ANKLE2	ANKLE2_23141_2_17	GTCAAAGCCGGATTGAAATG	-1.33875	-2.40322	-1.62304	-2.13128	-1.14504	29.0881	23.8324	25.297	31.5362	24.7084
ANKLE2	ANKLE2_23141_4_8	GACAGATGGTTTGTGCTTGT	-1.61684	-0.732639	-1.06522	-0.112837	-0.185927	29.0881	23.8324	25.297	31.5362	24.7084
ANKLE2	ANKLE2_sgANKLE2_9	CGGGAGGTCTGGGCCGCAGC	0.363597	-0.386866	-0.996005	0.028168	-0.721522	29.0881	23.8324	25.297	31.5362	24.7084
ANKLE2	ANKLE2_23141_1_5	TGCTGCTGATCGCTGTGCGG	-0.00854022	-0.917815	-1.39643	-0.283603	-0.527591	29.0881	23.8324	25.297	31.5362	24.7084
ANKLE2	ANKLE2_23141_2_3	CTGTAGGTGTCGGTGTCACT	-1.24725	-2.88631	-1.6583	-2.157	-1.26856	29.0881	23.8324	25.297	31.5362	24.7084
ANKLE2	ANKLE2_sgANKLE2_2	CGAGTGGGCGGCGCTGGCCT	0.531388	0.825608	0.49734	0.605224	0.420659	29.0881	23.8324	25.297	31.5362	24.7084
ANKLE2	ANKLE2_sgANKLE2_4	CTGGGAGCTGCTGGGCGCCT	1.35933	0.920471	1.35623	0.488933	0.956502	29.0881	23.8324	25.297	31.5362	24.7084
ANKLE2	ANKLE2_23141_2_2	CGCAGTCGCTCCAGCTCTGT	-1.61579	-2.13778	-1.80381	-1.36679	-1.76221	29.0881	23.8324	25.297	31.5362	24.7084
ANKLE2	ANKLE2_23141_4_4	TGGCGGTGAGGTCCTGCGTG	-1.61866	-1.17578	-1.24427	-2.12668	-1.75836	29.0881	23.8324	25.297	31.5362	24.7084
ANKLE2	ANKLE2_23141_1_3	CCCAGTTCCTCCGCCAAGCG	0.611545	-0.158581	1.09435	0.616312	0.303205	29.0881	23.8324	25.297	31.5362	24.7084
ANKRD29	ANKRD29_147463_2_7	GGCAGCCAGGAGAGGAAACC	0.106049	0.675026	1.16626	0.220613	0.508063	1.12381	0	0.950438	0.0139952	1.00311
ANKRD29	ANKRD29_147463_3_7	GCATGGCACCACACTCCTGA	-0.0239627	-0.920946	0.648914	-0.147574	0.0377154	1.12381	0	0.950438	0.0139952	1.00311
ANKRD29	ANKRD29_147463_1_1	GGACATCCTGCACATGTCCG	1.2686	0.183689	0.00668222	-0.240456	-0.177022	1.12381	0	0.950438	0.0139952	1.00311
ANKRD29	ANKRD29_147463_2_3	CAGCGCCAGGTTTCCTCTCC	0.0625152	0.487691	-0.300566	0.365602	0.524671	1.12381	0	0.950438	0.0139952	1.00311
ANKRD29	ANKRD29_147463_2_5	GAACAGCGGCCGGGTGGACG	-0.465001	-0.15606	0.0677303	-0.571322	0.33514	1.12381	0	0.950438	0.0139952	1.00311
ANKRD29	ANKRD29_147463_5_6	TGTTGGCTGCCAGTCAGTAC	-0.485461	-0.64942	0.341008	-0.518983	-0.0902674	1.12381	0	0.950438	0.0139952	1.00311
ANKRD29	ANKRD29_147463_2_6	AGCTGCTGTTGAACAGCGGC	1.40508	0.0373161	1.27235	0.458182	1.08913	1.12381	0	0.950438	0.0139952	1.00311
ANKRD29	ANKRD29_147463_3_4	GTGAGGGAACTGGTTCTGCA	0.310251	0.191631	-0.0479694	0.875186	0.357674	1.12381	0	0.950438	0.0139952	1.00311
ANKRD29	ANKRD29_147463_3_3	CAGCGTAGGCAGCAACCATC	-0.502866	0.174229	0.332055	0.37172	0.20476	1.12381	0	0.950438	0.0139952	1.00311
ANKRD29	ANKRD29_147463_4_3	CTATTCTTTGCCGCCCAGCA	0.762109	0.237227	0.712071	-0.10539	0.699734	1.12381	0	0.950438	0.0139952	1.00311
ANKRD29	ANKRD29_147463_3_5	CATAGACTGTGTGAGGGAAC	-0.704605	-0.23771	-0.103696	-0.244355	0.431657	1.12381	0	0.950438	0.0139952	1.00311
ANKRD29	ANKRD29_147463_3_6	CTGATGGTTGCTGCCTACGC	0.941126	-0.0397754	0.728784	-0.253289	0.185413	1.12381	0	0.950438	0.0139952	1.00311
ANKRD29	ANKRD29_147463_2_2	ACAGCAGCTTCAGCAGCGCC	0.964692	0.748529	0.953375	1.02291	0.20534	1.12381	0	0.950438	0.0139952	1.00311
ANKRD29	ANKRD29_147463_2_1	CTCTGCAGTCCACGTCCACC	-0.0701502	0.842401	0.219792	0.900087	0.803063	1.12381	0	0.950438	0.0139952	1.00311
ANKRD29	ANKRD29_147463_4_1	CGACATCATTATGGCCTTGC	-0.245236	-0.0304056	0.356353	0.4036	0.325303	1.12381	0	0.950438	0.0139952	1.00311
ANKRD29	ANKRD29_147463_4_2	CTTGCTGGGCGGCAAAGAAT	-0.599593	0.0262268	-0.422811	-0.363802	-0.0159041	1.12381	0	0.950438	0.0139952	1.00311
ANKRD29	ANKRD29_147463_3_2	ACAGTCTATGTGGCCAGCGT	-0.464279	0.148394	0.570947	0.155352	0.128713	1.12381	0	0.950438	0.0139952	1.00311
ANKRD29	ANKRD29_147463_5_7	TTTGCATGTCCATAGGACGG	-0.62912	-0.870211	-0.751797	-0.506682	0.29223	1.12381	0	0.950438	0.0139952	1.00311
ANKRD46	ANKRD46_157567_4_6	TCTTCACCTCTGTGGCCATG	-0.630805	0.0131859	-1.0054	0.815055	0.224376	5.87696	2.65382	6.3482	13.7979	2.9276
ANKRD46	ANKRD46_157567_6_10	GGACTCCTTCACCTTGCTGC	-0.313367	-0.0265578	0.103122	0.858251	-0.0484804	5.87696	2.65382	6.3482	13.7979	2.9276
ANKRD46	ANKRD46_157567_4_8	TAAATTCGGTGCCGATCTTC	0.20793	0.486837	0.349614	-0.422258	0.801892	5.87696	2.65382	6.3482	13.7979	2.9276
ANKRD46	ANKRD46_157567_5_2	GCATGGTCTCCAGTTTCGAG	0.630241	0.788541	0.683678	0.517126	0.228816	5.87696	2.65382	6.3482	13.7979	2.9276
ANKRD46	ANKRD46_157567_4_11	GCTGCAAGCCTGTATTGATG	0.2851	-0.183945	-1.44053	-0.521028	0.0184713	5.87696	2.65382	6.3482	13.7979	2.9276
ANKRD46	ANKRD46_157567_6_12	GAGGAGTGAATGGCTTTCCA	-0.769355	-0.117986	-0.193134	-0.0673776	0.360078	5.87696	2.65382	6.3482	13.7979	2.9276
ANKRD46	ANKRD46_157567_4_2	CATTCCCTCGAGCTGCTGCA	1.01133	1.52386	0.651098	1.96428	1.28565	5.87696	2.65382	6.3482	13.7979	2.9276
ANKRD46	ANKRD46_157567_4_4	ATCAATACAGGCTTGCAGCA	1.59688	1.3248	0.75899	0.29065	0.958536	5.87696	2.65382	6.3482	13.7979	2.9276
ANKRD46	ANKRD46_157567_4_9	TTCACCTTGCAGCAGCTCGA	0.5783	-0.128848	-0.777426	0.608594	0.360982	5.87696	2.65382	6.3482	13.7979	2.9276
ANKRD46	ANKRD46_157567_5_4	CAGAGGAACCCACTCGAAAC	0.507874	0.286772	-0.661967	0.3149	0.195094	5.87696	2.65382	6.3482	13.7979	2.9276
ANKRD46	ANKRD46_157567_6_26	CCCAACCTGCAGCAAGGTGA	1.30044	0.807076	0.358805	1.4871	0.911471	5.87696	2.65382	6.3482	13.7979	2.9276
ANKRD46	ANKRD46_157567_4_1	TAGTATCCACATGGCCACAG	0.440769	0.643681	-0.757644	0.531652	0.104038	5.87696	2.65382	6.3482	13.7979	2.9276
ANKRD46	ANKRD46_157567_4_7	CTTCTGGCCACAGATTATCA	0.297735	0.213817	-0.259361	-0.165374	-0.411514	5.87696	2.65382	6.3482	13.7979	2.9276
ANKRD46	ANKRD46_157567_4_3	CCCTGCTGTCACGAATATTT	-0.126676	0.246219	-0.664105	0.512989	0.267658	5.87696	2.65382	6.3482	13.7979	2.9276
ANKRD46	ANKRD46_157567_4_5	ACGACATTGTTCTGATGTGG	-0.150079	-0.813941	-0.803877	0.211874	-0.639575	5.87696	2.65382	6.3482	13.7979	2.9276
ANKRD46	ANKRD46_157567_5_5	TTGGAAGAACAGGAGGTGAA	1.1856	1.77023	0.342335	1.39932	0.950226	5.87696	2.65382	6.3482	13.7979	2.9276
ANKRD46	ANKRD46_157567_6_27	TTTCTTCTTCCACAGTGCCA	0.614292	0.536584	-0.395153	1.78188	-0.183487	5.87696	2.65382	6.3482	13.7979	2.9276
ANKRD46	ANKRD46_157567_4_10	CCAAATATTCGTGACAGCAG	-0.459504	-0.435716	-0.445998	-0.280147	-0.353936	5.87696	2.65382	6.3482	13.7979	2.9276
ANKS6	ANKS6_203286_2_31	GTGCGTCTACTGATGGAGTG	1.78522	0.623114	0.25613	-3.99116	0.963139	6.28495	7.12108	6.32253	12.0447	5.59625
ANKS6	ANKS6_203286_2_23	GACCGCCTTCGAGGTTGCAC	0.420968	-0.204937	-0.443637	0.529497	-0.14667	6.28495	7.12108	6.32253	12.0447	5.59625
ANKS6	ANKS6_203286_1_14	AGGGCGACACGGAGACGGCG	1.69822	1.41272	0.0965458	0.587882	1.06664	6.28495	7.12108	6.32253	12.0447	5.59625
ANKS6	ANKS6_203286_2_27	ACTCACTGGGCGGCTTGGAG	0.266606	0.172132	0.281543	-0.211684	0.135366	6.28495	7.12108	6.32253	12.0447	5.59625
ANKS6	ANKS6_203286_1_2	GTGGTTGCGGCTGTTGACCG	-0.630261	-1.06818	-1.27472	-2.14439	-0.651477	6.28495	7.12108	6.32253	12.0447	5.59625
ANKS6	ANKS6_203286_1_5	CGCCTCGTCCGAGCAATCCA	-0.0914572	-0.462124	-1.18684	-0.615752	-0.90999	6.28495	7.12108	6.32253	12.0447	5.59625
ANKS6	ANKS6_203286_1_6	CACACGCGCGCAGCAGCAGC	0.100683	-0.290399	-0.682886	-1.58092	0.35698	6.28495	7.12108	6.32253	12.0447	5.59625
ANKS6	ANKS6_203286_2_13	CGTGCTGGATGGCAGCCATC	1.30017	-0.01666	0.149785	0.241691	0.182567	6.28495	7.12108	6.32253	12.0447	5.59625
ANKS6	ANKS6_203286_2_10	CACGGTCCGGGCTGCGTGGT	0.202752	0.023382	0.344344	-0.876952	0.208554	6.28495	7.12108	6.32253	12.0447	5.59625
ANKS6	ANKS6_203286_1_13	TCCGGTGCCCGTGGATTGCT	0.547572	-0.113118	-0.293676	-0.592716	-0.324419	6.28495	7.12108	6.32253	12.0447	5.59625
ANKS6	ANKS6_203286_1_15	CGCGTGTGACCAGGGCGACA	-0.31516	-0.664922	-0.888469	-0.563699	-0.959674	6.28495	7.12108	6.32253	12.0447	5.59625
ANKS6	ANKS6_203286_2_11	CTCCATCAGTAGACGCACCA	1.10876	-0.143415	0.734479	0.316433	0.773238	6.28495	7.12108	6.32253	12.0447	5.59625
ANKS6	ANKS6_203286_2_35	ACCCTTCAGGCGAGCAACTG	-0.977919	-0.782309	-0.0988273	-0.481396	0.421383	6.28495	7.12108	6.32253	12.0447	5.59625
ANKS6	ANKS6_203286_1_12	GTGGATTGCTCGGACGAGGC	1.16662	1.4735	1.12857	1.36962	1.90476	6.28495	7.12108	6.32253	12.0447	5.59625
ANKS6	ANKS6_203286_1_9	ACAGCCGCAACCACTACGGC	-0.352122	0.466184	0.6014	0.196986	0.33605	6.28495	7.12108	6.32253	12.0447	5.59625
ANKS6	ANKS6_203286_2_7	TCCAAGCCGCCCAGTGAGTG	-0.410401	-0.513226	0.00843337	0.235475	0.0365057	6.28495	7.12108	6.32253	12.0447	5.59625
ANKS6	ANKS6_203286_2_30	AACCACGCAGCCCGGACCGT	1.24715	0.498022	0.483851	0.537076	0.362281	6.28495	7.12108	6.32253	12.0447	5.59625
ANKS6	ANKS6_203286_2_41	ACACCTCCTGTTGGATCACG	-0.583793	0.729399	0.490013	0.150267	0.436765	6.28495	7.12108	6.32253	12.0447	5.59625
ANKS6	ANKS6_203286_2_33	CTTGGACATCACAGCCCTGA	0.679441	-0.54854	0.531658	0.284077	0.325526	6.28495	7.12108	6.32253	12.0447	5.59625
ANO1	ANO1_55107_3_17	GCCGGCCGTCCCTGAAGTAC	-0.70741	-0.201518	-0.198917	0.613994	-0.500022	0.0759319	0.0390545	57.0639	0.0196885	0.0256542
ANO1	ANO1_55107_1_3	GCGCACAGGCGGCCACGATG	-0.591963	-0.592352	-0.151016	0.344527	-0.0437479	0.0759319	0.0390545	57.0639	0.0196885	0.0256542
ANO1	ANO1_55107_2_4	GCCGGCACCAGATGCTGACC	-0.0206588	1.19642	0.509161	-0.258021	-0.873012	0.0759319	0.0390545	57.0639	0.0196885	0.0256542
ANO1	ANO1_55107_1_12	TGGACGCTGCGGTCCTCGGC	-0.192205	-0.658347	0.196352	0.340183	-0.656925	0.0759319	0.0390545	57.0639	0.0196885	0.0256542
ANO1	ANO1_55107_3_12	GGAGTACGAGGGCAACCTCC	-0.480247	-0.436814	-0.86359	-0.513711	-0.117744	0.0759319	0.0390545	57.0639	0.0196885	0.0256542
ANO1	ANO1_55107_3_23	GGAAGCGCTTGTCATCCTCG	-1.04878	-0.169905	0.253369	0.136945	-0.128842	0.0759319	0.0390545	57.0639	0.0196885	0.0256542
ANO1	ANO1_55107_3_5	GCGCAAGGTGGACTACATCC	0.283657	0.0504713	0.578087	0.990903	0.764586	0.0759319	0.0390545	57.0639	0.0196885	0.0256542
ANO1	ANO1_55107_3_10	AGGATGACAAGCGCTTCCGC	0.968352	-0.183503	0.430867	1.24188	0.625198	0.0759319	0.0390545	57.0639	0.0196885	0.0256542
ANO1	ANO1_55107_1_10	ATCGTGGCCGCCTGTGCGCT	0.0769855	1.12613	1.07312	-0.169888	0.579815	0.0759319	0.0390545	57.0639	0.0196885	0.0256542
ANO1	ANO1_55107_3_20	ACCAGGGTCCGGTTGCCCGA	-0.0291174	0.0688561	0.681235	-0.227664	0.954514	0.0759319	0.0390545	57.0639	0.0196885	0.0256542
ANO1	ANO1_55107_3_19	GCCTCTTGTGATGGTACACC	0.289266	0.154189	0.715883	0.0404537	0.817918	0.0759319	0.0390545	57.0639	0.0196885	0.0256542
ANO1	ANO1_55107_3_6	TCCTGGTGTACCATCACAAG	-0.596737	-0.959079	-0.511341	-0.443175	-1.07284	0.0759319	0.0390545	57.0639	0.0196885	0.0256542
ANO1	ANO1_55107_3_16	CATACTTGCACTCGGCATCA	-1.24628	0.176006	0.315124	0.609463	-0.0703612	0.0759319	0.0390545	57.0639	0.0196885	0.0256542
ANO1	ANO1_55107_1_11	CTTCTCGTTGACCCTCATCG	-0.851437	-1.22421	-0.289447	-0.361249	-0.497509	0.0759319	0.0390545	57.0639	0.0196885	0.0256542
ANO1	ANO1_55107_1_4	CGAGAAGTACTCGACGCTCC	-1.38536	0.321429	0.638512	-0.089199	-0.172945	0.0759319	0.0390545	57.0639	0.0196885	0.0256542
ANO1	ANO1_55107_3_11	CTTCCGCAGGGAGGAGTACG	0.270918	-0.183757	0.750224	-0.645486	0.619189	0.0759319	0.0390545	57.0639	0.0196885	0.0256542
ANO1	ANO1_55107_1_14	CAGGTAGCCGATGTCCTCGA	-0.0573271	-0.244196	0.224193	-0.232171	0.838604	0.0759319	0.0390545	57.0639	0.0196885	0.0256542
ANO1	ANO1_55107_3_2	CCTGATGCCGAGTGCAAGTA	-0.417784	-0.116641	0.40028	0.38478	0.446932	0.0759319	0.0390545	57.0639	0.0196885	0.0256542
ANO1	ANO1_55107_3_22	TCCTCGTGGTAGTCCATCGG	-0.420457	-0.39605	0.110469	-0.251848	-0.246279	0.0759319	0.0390545	57.0639	0.0196885	0.0256542
ANO1	ANO1_55107_1_6	CATCGGCTACCTGCCGTCCG	0.0718923	1.00834	1.2793	0.499124	0.650106	0.0759319	0.0390545	57.0639	0.0196885	0.0256542
ANPEP	ANPEP_290_5_8	GGCCCGGCCCAGTGCCATTG	0.972514	-0.816629	-0.045978	-0.089024	0.0767593	0.085421	259.235	0.0355998	0.0707546	0.173668
ANPEP	ANPEP_290_2_42	CGTCCGTTTCACCTGCAAGG	-0.601229	-0.0281251	-1.31694	0.755498	0.413119	0.085421	259.235	0.0355998	0.0707546	0.173668
ANPEP	ANPEP_290_2_14	GGTACGGTCTCAGCGTCACC	-0.157054	-0.0462331	-0.708583	-0.964391	-0.393067	0.085421	259.235	0.0355998	0.0707546	0.173668
ANPEP	ANPEP_290_3_3	GATGTTGAACTCGGCCTTCA	0.4554	0.982511	0.916725	0.694088	0.570292	0.085421	259.235	0.0355998	0.0707546	0.173668
ANPEP	ANPEP_290_2_15	CAGCGTCACCCGGTAGGAAT	-0.027725	1.19206	0.49434	1.11961	-0.494225	0.085421	259.235	0.0355998	0.0707546	0.173668
ANPEP	ANPEP_290_5_2	ATCGCCGTGGCCCGCCGCAA	0.821659	2.00524	1.15242	1.28195	1.37082	0.085421	259.235	0.0355998	0.0707546	0.173668
ANPEP	ANPEP_290_2_20	TGGCGTTCTTGTTCTTCTCC	0.291145	0.181902	-0.25853	0.914736	-0.116895	0.085421	259.235	0.0355998	0.0707546	0.173668
ANPEP	ANPEP_290_4_2	AATGAAGGCCAGCAAGTACG	1.47046	0.559341	0.359689	1.5499	1.30362	0.085421	259.235	0.0355998	0.0707546	0.173668
ANPEP	ANPEP_290_2_21	CAGTGCGATGATTGTGCACA	0.725195	0.438989	-0.465503	-0.013233	-0.0369646	0.085421	259.235	0.0355998	0.0707546	0.173668
ANPEP	ANPEP_290_3_2	GCATGTTGGACAGGGCTGTC	-0.204422	-0.380985	-0.266059	0.175079	-0.205894	0.085421	259.235	0.0355998	0.0707546	0.173668
ANPEP	ANPEP_290_2_34	GATGGACAGCGAGTTCGAGG	0.161687	0.021618	0.419903	0.676214	0.796274	0.085421	259.235	0.0355998	0.0707546	0.173668
ANPEP	ANPEP_290_2_32	TACCGCAGCGAGTACATGGA	0.239958	0.31945	0.148388	-0.911987	0.419914	0.085421	259.235	0.0355998	0.0707546	0.173668
ANPEP	ANPEP_290_2_2	CGCTGCGGTAGAAGCCCGCC	0.29819	-0.727315	0.473423	-0.125064	-0.149494	0.085421	259.235	0.0355998	0.0707546	0.173668
ANPEP	ANPEP_290_2_44	CCTTGGACCAAAGTAAAGCG	0.653894	0.920824	0.503326	1.56214	0.732889	0.085421	259.235	0.0355998	0.0707546	0.173668
ANPEP	ANPEP_290_2_39	CATTGACAAGACTGAGCTGG	1.58631	-0.83762	0.163183	0.995082	0.600596	0.085421	259.235	0.0355998	0.0707546	0.173668
ANPEP	ANPEP_290_2_37	TACCTGGTGGTGCACCTCAA	0.997247	0.245774	0.719732	1.10572	0.980488	0.085421	259.235	0.0355998	0.0707546	0.173668
ANPEP	ANPEP_290_3_4	ATGGCCGGCTCATCGAAGCA	2.26656	1.29992	0.704832	1.40803	0.852958	0.085421	259.235	0.0355998	0.0707546	0.173668
ANPEP	ANPEP_290_4_8	CAAGATGTCCACGTACTTGC	-0.296063	0.1807	-0.296305	0.20243	-0.265156	0.085421	259.235	0.0355998	0.0707546	0.173668
ANPEP	ANPEP_290_3_7	CTTCGATGAGCCGGCCATGA	1.16585	1.09611	1.06449	0.396562	1.02341	0.085421	259.235	0.0355998	0.0707546	0.173668
ANPEP	ANPEP_290_2_17	CCACGCTTTACTTTGGTCCA	-0.110255	0.349948	0.132665	0.377875	0.690661	0.085421	259.235	0.0355998	0.0707546	0.173668
ANXA13	ANXA13_312_5_9	GTCCCAGCGAGTACGCCGCC	0.465132	-0.636654	0.31824	0.592398	0.182451	0.0571156	0	0.263538	0	0
ANXA13	ANXA13_312_8_1	GGACAAAGATCTAGCTGGTC	0.682855	-0.469363	0.0627462	0.000765675	0.0445617	0.0571156	0	0.263538	0	0
ANXA13	ANXA13_312_2_9	CAGTCGTACACCCTCTCAGA	-0.630172	-0.0479726	-1.09445	-2.02868	-0.874333	0.0571156	0	0.263538	0	0
ANXA13	ANXA13_312_5_6	TCATTGAGGTCCTGTGCACG	0.131682	-0.0860949	-0.356517	-0.367163	-0.444085	0.0571156	0	0.263538	0	0
ANXA13	ANXA13_312_2_3	GAGAGGCTGCACGACTGTCG	-0.077523	0.944942	0.641947	0.709798	1.19151	0.0571156	0	0.263538	0	0
ANXA13	ANXA13_312_5_4	TGCCGGGCGGCGTACTCGCT	0.455714	-0.56401	0.110531	-0.735905	-0.543098	0.0571156	0	0.263538	0	0
ANXA13	ANXA13_312_2_1	TCTGGCTCTCCATTCCGTGA	-0.0104723	0.0645298	-0.0847741	0.0656544	-0.0873026	0.0571156	0	0.263538	0	0
ANXA13	ANXA13_312_2_5	CTTCTGAGAGGGTGTACGAC	-0.0436473	0.594063	0.0195056	0.298695	-0.118297	0.0571156	0	0.263538	0	0
ANXA13	ANXA13_312_2_8	CAGTCAACAGTTGCCTAAAG	0.644004	0.264313	-0.846638	-0.427487	0.234736	0.0571156	0	0.263538	0	0
ANXA13	ANXA13_312_5_2	TCGTGCACAGGACCTCAATG	-0.99302	-0.707997	-0.668275	-1.50293	0.191458	0.0571156	0	0.263538	0	0
ANXA13	ANXA13_312_3_2	GCTAAAGCGAGCAGTCCTCA	-0.64002	0.0988114	0.375315	-0.165471	-0.10383	0.0571156	0	0.263538	0	0
ANXA13	ANXA13_312_5_1	CCTTATTGGTCCTCGTGCAC	-1.08761	-0.32622	-0.577573	-0.671087	-0.0217873	0.0571156	0	0.263538	0	0
ANXA13	ANXA13_312_8_2	TCGCAATGAAGGAGATGACG	0.00115196	-0.122129	-0.26976	0.208326	0.120398	0.0571156	0	0.263538	0	0
ANXA13	ANXA13_312_11_3	ACAAGTCGATGAAGGGTGCG	0.740846	-0.154951	0.397141	0.176846	-0.0552885	0.0571156	0	0.263538	0	0
ANXA13	ANXA13_312_7_3	AGCCTCGAATCAGATGTCAA	1.15147	0.774672	-0.109797	0.122148	0.575773	0.0571156	0	0.263538	0	0
ANXA13	ANXA13_312_10_1	AACATCAGGCGACTTGCAGA	0.758235	0.587252	0.508803	1.2008	1.14412	0.0571156	0	0.263538	0	0
ANXA13	ANXA13_312_7_2	CACCTTTGACATCTGATTCG	0.835829	0.243113	-0.145621	0.0250908	0.481443	0.0571156	0	0.263538	0	0
ANXA4	ANXA4_307_4_3	GTAGGCAAGGACGCTAATAA	0.241771	-0.369316	-0.720336	0.164489	-0.12629	24.9013	26.6893	137.315	18.7163	17.3568
ANXA4	ANXA4_307_5_1	GACCTGAAGTCAGAACTGAG	1.20594	0.255857	0.344516	0.597801	0.989733	24.9013	26.6893	137.315	18.7163	17.3568
ANXA4	ANXA4_307_4_4	GGGCGGTGTTGCGGTAGGCA	0.211801	-0.692934	-0.0394329	-0.457588	0.2647	24.9013	26.6893	137.315	18.7163	17.3568
ANXA4	ANXA4_307_3_7	CATGGCCTTCCTCAGGGTCT	0.738983	0.333806	0.34019	0.121511	-0.073845	24.9013	26.6893	137.315	18.7163	17.3568
ANXA4	ANXA4_307_4_1	CCGCCCAGCGCCAGGAGATC	0.914726	1.04554	0.501444	-0.41478	0.483182	24.9013	26.6893	137.315	18.7163	17.3568
ANXA4	ANXA4_307_3_8	ACACATACCGAGCCCTTTCA	0.677949	-0.244958	0.230854	0.438722	0.617844	24.9013	26.6893	137.315	18.7163	17.3568
ANXA4	ANXA4_307_3_1	GGTACTGTCAAAGCTGCTTC	0.397183	0.250914	0.702521	-0.316201	-0.191404	24.9013	26.6893	137.315	18.7163	17.3568
ANXA4	ANXA4_307_3_3	TGGAAGATGCCCAGACCCTG	0.136815	0.740729	0.455494	0.683899	0.810166	24.9013	26.6893	137.315	18.7163	17.3568
ANXA4	ANXA4_307_2_3	CTTACCATGGCCATGACTCT	-0.847318	0.0401011	0.113627	0.0826273	0.174887	24.9013	26.6893	137.315	18.7163	17.3568
ANXA4	ANXA4_307_4_2	ACAGCCTACAAGAGCACCAT	0.701749	0.15565	1.05638	0.208955	0.77098	24.9013	26.6893	137.315	18.7163	17.3568
ANXA4	ANXA4_307_4_7	CCTGCCGATGGTGCTCTTGT	-1.01551	-0.590876	0.489669	0.912311	0.686411	24.9013	26.6893	137.315	18.7163	17.3568
ANXA4	ANXA4_307_3_5	AGCTTTGACAGTACCTCCTT	-1.00712	-0.730377	-0.224189	0.532041	-0.617668	24.9013	26.6893	137.315	18.7163	17.3568
ANXA4	ANXA4_307_3_4	ACCCTGAGGAAGGCCATGAA	1.21992	0.877744	1.10356	0.148558	0.45154	24.9013	26.6893	137.315	18.7163	17.3568
ANXA4	ANXA4_307_5_5	TGCCACTCAGTTCTGACTTC	0.497981	0.82901	0.512469	0.0316789	0.35371	24.9013	26.6893	137.315	18.7163	17.3568
ANXA4	ANXA4_307_4_6	TGTAGGCTGTCCTGATCTCC	0.0383013	-0.394051	0.334515	-0.224429	0.199804	24.9013	26.6893	137.315	18.7163	17.3568
ANXA4	ANXA4_307_5_2	ACTGAGTGGCAACTTCGAGC	-0.105	-0.71719	0.163906	0.268102	0.0545276	24.9013	26.6893	137.315	18.7163	17.3568
ANXA4	ANXA4_307_3_2	TGCTTCAGGATTCAATGCCA	0.546884	-0.919256	0.382652	-0.648277	-0.174718	24.9013	26.6893	137.315	18.7163	17.3568
ANXA4	ANXA4_307_4_5	CCTGATCTCCTGGCGCTGGG	0.860741	0.324227	-0.322257	0.258812	-0.370194	24.9013	26.6893	137.315	18.7163	17.3568
ANXA4	ANXA4_307_2_2	CTGATCTTGACCTAGAGTCA	-0.131569	-1.02808	-0.208322	-0.806533	0.584795	24.9013	26.6893	137.315	18.7163	17.3568
ANXA4	ANXA4_307_4_8	ACTGTGGCCTACCCTGCCGA	0.796852	0.555639	0.0229651	0.220054	0.20268	24.9013	26.6893	137.315	18.7163	17.3568
AP2M1	AP2M1_1173_8_3	GAGTCGCACACACTGGTGGA	-1.07737	-1.24152	-5.07858	-3.10753	-1.18007	143.5	507.623	89.5513	141.905	231.636
AP2M1	AP2M1_1173_3_14	GGCAGCGTTGACATTCTGCT	-0.927665	-1.11959	-0.0578591	-2.2095	-0.294758	143.5	507.623	89.5513	141.905	231.636
AP2M1	AP2M1_1173_6_4	GAGAGGGTATCAAGTATCGT	-1.37441	-1.96306	-2.37014	-5.15437	-1.6327	143.5	507.623	89.5513	141.905	231.636
AP2M1	AP2M1_1173_3_6	GACGTGATGGCTGCCTACTT	0.0690735	0.310155	0.390438	-0.572364	-0.406835	143.5	507.623	89.5513	141.905	231.636
AP2M1	AP2M1_1173_2_5	GATGTCATCTCGGTAGACTC	-3.02826	-2.47644	-1.60191	-2.23167	-3.18074	143.5	507.623	89.5513	141.905	231.636
AP2M1	AP2M1_1173_2_3	TGGCGGCAGATCAGTCTCCG	1.08808	0.418314	1.44087	0.376233	0.923469	143.5	507.623	89.5513	141.905	231.636
AP2M1	AP2M1_1173_6_1	GCAGTCACAGATCACCAGCC	0.75604	1.02726	0.813253	1.18615	0.582737	143.5	507.623	89.5513	141.905	231.636
AP2M1	AP2M1_1173_2_2	GACTGATCTGCCGCCATGAT	-0.910635	-1.38104	-0.485844	-2.29578	-2.12243	143.5	507.623	89.5513	141.905	231.636
AP2M1	AP2M1_1173_4_2	CGCCTGTCTCGGAATTCTGT	-4.03717	-3.99302	-4.19415	-3.22694	-2.89803	143.5	507.623	89.5513	141.905	231.636
AP2M1	AP2M1_1173_9_3	AGAAGTGGGACGCACCAAAC	-0.731057	-1.9041	-2.12891	-2.54807	-1.90095	143.5	507.623	89.5513	141.905	231.636
AP2M1	AP2M1_1173_6_3	GCAGATTGGCTGGCGGCGAG	-0.362113	-1.07696	-0.681596	-1.45296	-1.43934	143.5	507.623	89.5513	141.905	231.636
AP2M1	AP2M1_1173_3_15	CTCGCTGATCTTGCCAAAGT	-1.58802	-2.0015	-1.67973	-1.40894	-2.58477	143.5	507.623	89.5513	141.905	231.636
AP2M1	AP2M1_1173_9_2	GATCCCGCTAGTGCGAGAAG	-1.05753	-2.1184	-0.832192	-0.277287	0.542045	143.5	507.623	89.5513	141.905	231.636
AP2M1	AP2M1_1173_4_1	TACCCACAGAATTCCGAGAC	-1.31095	-1.98519	-1.95856	-2.78545	-1.14718	143.5	507.623	89.5513	141.905	231.636
AP2M1	AP2M1_1173_3_10	TGCGAGCAATGTTGGTGACG	-1.92155	-1.62693	-1.84907	-2.54341	-1.54688	143.5	507.623	89.5513	141.905	231.636
AP2M1	AP2M1_1173_3_4	ACGTTAAGCGGTCCAACATT	-2.20369	-2.33011	-2.48118	-2.36759	-1.94112	143.5	507.623	89.5513	141.905	231.636
AP2M1	AP2M1_1173_6_5	TCGTCGGAATGAGCTCTTCC	-1.37999	-1.84631	-2.09988	-1.81724	-1.5016	143.5	507.623	89.5513	141.905	231.636
AP2M1	AP2M1_1173_3_12	AAATGTTGGACCGCTTAACG	-0.293495	-1.11786	-1.32888	-1.92105	-1.0379	143.5	507.623	89.5513	141.905	231.636
AP2M1	AP2M1_1173_3_11	CCGCTTAACGTGGAAGAAGC	-2.19841	-2.06997	-2.67248	-0.615728	-1.67192	143.5	507.623	89.5513	141.905	231.636
AP2M1	AP2M1_1173_3_7	CTACTTTGGCAAGATCAGCG	0.192048	-2.13186	-1.56958	-0.410263	-1.83201	143.5	507.623	89.5513	141.905	231.636
AP3M2	AP3M2_10947_3_1	GGCGCAAGAGAGAGCTACTG	0.404295	-0.29623	-1.40198	0.331229	0.741814	13.3412	8.06393	6.98634	8.70814	8.29535
AP3M2	AP3M2_10947_7_4	CAGCGTTTGAAACGAACACA	0.304003	0.112913	-0.372612	0.382607	0.773456	13.3412	8.06393	6.98634	8.70814	8.29535
AP3M2	AP3M2_10947_7_6	GGCGGAAGTTTCCATCAGGA	0.0653068	0.740044	-0.80685	0.984027	0.265672	13.3412	8.06393	6.98634	8.70814	8.29535
AP3M2	AP3M2_10947_6_2	GATGCCTGTGTCAAGCTGAC	0.583311	0.430166	0.586086	-0.259572	1.09198	13.3412	8.06393	6.98634	8.70814	8.29535
AP3M2	AP3M2_10947_4_1	GCCTCCTACCATCCTTCGAA	0.328176	-0.68482	-0.364917	1.83589	0.388208	13.3412	8.06393	6.98634	8.70814	8.29535
AP3M2	AP3M2_10947_7_8	CTTACTTCTGTGCACTGACA	-1.0704	-0.412104	0.0344288	-0.506032	0.0565843	13.3412	8.06393	6.98634	8.70814	8.29535
AP3M2	AP3M2_10947_4_2	ATGTTCGACTCGGTAGCCAA	0.98631	1.22652	0.778239	0.843757	1.17796	13.3412	8.06393	6.98634	8.70814	8.29535
AP3M2	AP3M2_10947_6_1	CACAATTACTGCTGAGATCC	0.616612	1.0816	0.84562	0.334161	0.442708	13.3412	8.06393	6.98634	8.70814	8.29535
AP3M2	AP3M2_10947_6_3	CTGGATCTCAGCAGTAATTG	0.199424	0.890387	-0.00487543	1.13317	1.05448	13.3412	8.06393	6.98634	8.70814	8.29535
AP3M2	AP3M2_10947_7_7	TGACATGGTAAGACAGCAGG	1.27174	0.752614	0.261529	1.06354	1.28405	13.3412	8.06393	6.98634	8.70814	8.29535
AP3M2	AP3M2_10947_4_3	ACCGTTCGAAGGATGGTAGG	-0.0684837	-0.229798	-0.770821	0.0882375	0.0296082	13.3412	8.06393	6.98634	8.70814	8.29535
AP3M2	AP3M2_10947_7_5	CATCAGGAGGGATGAAGGAG	-0.424394	-0.347489	-0.84711	-1.20574	-0.456849	13.3412	8.06393	6.98634	8.70814	8.29535
AP3M2	AP3M2_10947_7_1	CTTGTGTTCGTTTCAAACGC	-0.421542	-0.715075	-0.234328	-0.192148	-0.555044	13.3412	8.06393	6.98634	8.70814	8.29535
AP3M2	AP3M2_10947_5_3	TGTCAGTGGTGCCTTGGCGA	0.0756677	0.26487	-0.574054	0.0826889	-0.375812	13.3412	8.06393	6.98634	8.70814	8.29535
AP3M2	AP3M2_10947_6_4	CATGCCAGTCAGCTTGACAC	-0.284956	-0.196426	0.0377099	-0.0468215	0.0256416	13.3412	8.06393	6.98634	8.70814	8.29535
AP3M2	AP3M2_10947_3_3	CATTGAGTTTCTTCACCGAG	0.798927	0.70591	0.363532	0.758906	1.11319	13.3412	8.06393	6.98634	8.70814	8.29535
AP3M2	AP3M2_10947_7_2	CTCTCCTTCATCCCTCCTGA	-0.14601	0.0851682	-0.332421	-0.0787325	0.825418	13.3412	8.06393	6.98634	8.70814	8.29535
AP3M2	AP3M2_10947_7_3	CTGACATCATCCAACAACCT	1.10822	1.17051	0.258138	0.806745	0.707966	13.3412	8.06393	6.98634	8.70814	8.29535
AP3M2	AP3M2_10947_3_4	ACTCAATGACAAACAGAGGG	-0.152957	-0.9219	-1.19564	0.296133	0.266076	13.3412	8.06393	6.98634	8.70814	8.29535
AP3M2	AP3M2_10947_3_2	TGTGGCCGTGATCCAGACGG	-0.150295	-0.0535382	-0.197973	-0.429482	0.793742	13.3412	8.06393	6.98634	8.70814	8.29535
APAF1	APAF1_317_5_1	GGAGTGCATTGGGTTTCAGT	-0.121185	-1.27553	0.193423	-0.142543	0.0416532	8.27748	4.25987	3.88767	5.42024	5.84876
APAF1	APAF1_sgAPAF1_5	GCTGCTCTTTGCTGTTGAGT	-0.558536	-0.710935	1.03161	0.271791	-0.991621	8.27748	4.25987	3.88767	5.42024	5.84876
APAF1	APAF1_317_4_5	GTGGTACTCCACCTTCACAC	0.198176	0.666371	0.126129	0.55569	-1.01565	8.27748	4.25987	3.88767	5.42024	5.84876
APAF1	APAF1_317_4_3	CCAGGATGGGTCACCATACA	0.601956	1.05456	1.24363	0.658281	1.2098	8.27748	4.25987	3.88767	5.42024	5.84876
APAF1	APAF1_sgAPAF1_6	AGCATTGTAGAATGATACGT	-0.415561	-1.29801	-1.02012	-0.0425752	-0.618688	8.27748	4.25987	3.88767	5.42024	5.84876
APAF1	APAF1_sgAPAF1_4	ATGGATCACATGATTAGTGA	1.81681	0.779898	1.86651	1.53962	1.10539	8.27748	4.25987	3.88767	5.42024	5.84876
APAF1	APAF1_sgAPAF1_1	GCTTCAACATAGAGAAGCTC	0.6642	0.367644	-0.0395944	-0.300679	0.542659	8.27748	4.25987	3.88767	5.42024	5.84876
APAF1	APAF1_sgAPAF1_9	AGGAATGCCATCATGGAGAA	1.84947	0.724465	0.574447	1.40543	1.03142	8.27748	4.25987	3.88767	5.42024	5.84876
APAF1	APAF1_317_4_2	GTGAAGGTGGAGTACCACAG	-0.601456	0.137357	-0.82464	-0.981159	-0.479048	8.27748	4.25987	3.88767	5.42024	5.84876
APAF1	APAF1_317_4_1	GTAAGGACAGTCCTGTGTGA	0.276991	0.472472	0.0224102	0.171813	0.592676	8.27748	4.25987	3.88767	5.42024	5.84876
APAF1	APAF1_sgAPAF1_10	AGACAACAGGAATGCCATCA	1.49718	0.793924	0.5056	0.588418	0.906062	8.27748	4.25987	3.88767	5.42024	5.84876
APAF1	APAF1_sgAPAF1_7	TACAATGCTCTACTACATGA	-0.708618	0.346286	0.0835942	0.00696824	0.330656	8.27748	4.25987	3.88767	5.42024	5.84876
APAF1	APAF1_317_4_4	ATACATGGAATGGCAGGCTG	-1.19475	-0.789647	-0.992611	-0.188351	-0.278681	8.27748	4.25987	3.88767	5.42024	5.84876
APAF1	APAF1_317_3_4	CCACTGGAAGAAGAGACAAC	1.58375	0.554063	1.04489	1.37202	1.65694	8.27748	4.25987	3.88767	5.42024	5.84876
APAF1	APAF1_sgAPAF1_8	CTTGCTGCCCTTCTCCATGA	0.218759	-0.489119	0.288513	0.373837	0.650028	8.27748	4.25987	3.88767	5.42024	5.84876
APAF1	APAF1_sgAPAF1_2	CATCAAGACATCCTACATCA	0.462486	0.680582	1.02543	0.780952	1.07223	8.27748	4.25987	3.88767	5.42024	5.84876
APAF1	APAF1_317_3_2	CCTGTTGTCTCTTCTTCCAG	-0.00896561	-0.343127	0.122588	-0.339491	-0.0842177	8.27748	4.25987	3.88767	5.42024	5.84876
APAF1	APAF1_sgAPAF1_3	AATCATGTGATCCATGATGT	-0.820966	-0.369018	0.192696	0.364064	-0.275184	8.27748	4.25987	3.88767	5.42024	5.84876
APAF1	APAF1_317_4_6	CCATGTATGGTGACCCATCC	-0.127032	-0.00968016	0.309451	0.15531	-0.243128	8.27748	4.25987	3.88767	5.42024	5.84876
APAF1	APAF1_317_4_7	ACAGCCTGCCATTCCATGTA	1.2653	0.883607	0.737352	0.510629	0.905959	8.27748	4.25987	3.88767	5.42024	5.84876
APMAP	APMAP_57136_6_4	AAGACGAGACTACCTGCTTC	0.992141	1.06476	0.926617	0.311887	2.36007	68.7227	150.907	87.6113	99.1034	181.186
APMAP	APMAP_57136_3_2	GCCTGTCGCAGCTTCGTATT	0.168825	0.127112	0.118432	0.378672	0.528791	68.7227	150.907	87.6113	99.1034	181.186
APMAP	APMAP_57136_1_7	GTACCATGAGCGAGGCGGAC	-0.280413	0.551624	0.429571	0.320542	0.115488	68.7227	150.907	87.6113	99.1034	181.186
APMAP	APMAP_57136_5_3	GGGCCCTGCACGGATACCCA	-0.103921	-0.198934	-0.536603	0.169061	0.310372	68.7227	150.907	87.6113	99.1034	181.186
APMAP	APMAP_57136_5_7	GTATCCGTGCAGGGCCCAAT	-1.30625	-0.0661013	-0.283135	-0.78507	-0.47794	68.7227	150.907	87.6113	99.1034	181.186
APMAP	APMAP_57136_5_8	GAGATGATGAGCCTGTGTGT	-0.547037	0.140495	0.0849254	0.574003	-0.0415232	68.7227	150.907	87.6113	99.1034	181.186
APMAP	APMAP_57136_8_4	CGACCATCCGCCCTAACCCT	-0.474956	0.48202	-0.880964	0.152534	0.0703636	68.7227	150.907	87.6113	99.1034	181.186
APMAP	APMAP_57136_6_7	CCTCCGAGACACCCATTGAG	-1.55321	0.252275	-0.135893	0.531401	-0.076629	68.7227	150.907	87.6113	99.1034	181.186
APMAP	APMAP_57136_7_9	GACCAGCTGCGGTTCCCGAA	1.44849	1.80232	0.378503	1.67822	1.51904	68.7227	150.907	87.6113	99.1034	181.186
APMAP	APMAP_57136_7_6	CTCCATTCGGGAACCGCAGC	0.0269558	0.534746	0.614938	0.771343	0.574699	68.7227	150.907	87.6113	99.1034	181.186
APMAP	APMAP_57136_4_2	ACCATTGCCCGGTTTGGTTC	-0.563279	0.4694	-0.728605	0.4079	-0.758079	68.7227	150.907	87.6113	99.1034	181.186
APMAP	APMAP_57136_7_1	ACACCTTCGTATCCTGGCCA	0.0781883	0.578313	0.897712	0.566843	1.19947	68.7227	150.907	87.6113	99.1034	181.186
APMAP	APMAP_57136_1_1	TACCTGCCGTCCTTAGCCTC	-0.534231	-0.308591	0.00952374	-0.474245	-0.281788	68.7227	150.907	87.6113	99.1034	181.186
APMAP	APMAP_57136_4_1	TGCAAGGGCCCGAACCAAAC	-0.703923	-0.577893	0.0884331	0.189166	0.0562986	68.7227	150.907	87.6113	99.1034	181.186
APMAP	APMAP_57136_9_23	TCTAGGACGAGGCTGTACCG	-1.34139	-0.43206	-0.367781	-0.382303	-0.317227	68.7227	150.907	87.6113	99.1034	181.186
APMAP	APMAP_57136_3_1	CCAATATGTGCTATGGACTC	-0.0985561	0.568521	0.187292	0.270922	-0.61611	68.7227	150.907	87.6113	99.1034	181.186
APMAP	APMAP_57136_8_2	CTGCTGGGCCGGATGTTGTC	-0.0576511	0.224449	0.614749	0.571258	0.564541	68.7227	150.907	87.6113	99.1034	181.186
APMAP	APMAP_57136_8_1	AAACCCAGGGTTAGGGCGGA	0.213697	0.0197841	0.935851	0.738125	0.522644	68.7227	150.907	87.6113	99.1034	181.186
AQP11	AQP11_282679_1_13	GCTGTCGGTGGTGCTGCTCA	-0.526167	0.314323	0.485702	0.313585	-0.704769	0.784517	1.21873	2.78442	1.964	2.15352
AQP11	AQP11_282679_1_45	CGAGCGTCAGCGTCCAGGTG	-1.68016	-0.833681	-0.0996284	0.390229	-0.911915	0.784517	1.21873	2.78442	1.964	2.15352
AQP11	AQP11_282679_1_43	GCAGCAGCAGAGCTGGAAGG	-1.57637	0.148408	-2.07351	-0.737538	0.297019	0.784517	1.21873	2.78442	1.964	2.15352
AQP11	AQP11_282679_1_11	GCAGGACACCTGCACCTCGC	-0.686074	-0.949839	-0.172723	-0.741586	-0.331192	0.784517	1.21873	2.78442	1.964	2.15352
AQP11	AQP11_282679_1_36	TGGCTCCGTCGCCGCCTGAG	-4.15879	-2.54685	-2.54741	-3.46428	-1.55165	0.784517	1.21873	2.78442	1.964	2.15352
AQP11	AQP11_282679_1_18	GGCACGTCCAGCAACCCGTG	-1.02907	0.223687	-0.190766	-0.129543	0.483373	0.784517	1.21873	2.78442	1.964	2.15352
AQP11	AQP11_282679_1_41	AGGACGAAGGCGTGGGCCAC	0.376108	1.3587	0.182863	0.188955	0.186542	0.784517	1.21873	2.78442	1.964	2.15352
AQP11	AQP11_282679_1_47	CATCACGCCGCACGGGTTGC	-0.45299	0.69816	0.502081	-0.937076	-0.124708	0.784517	1.21873	2.78442	1.964	2.15352
AQP11	AQP11_282679_1_38	CATCAGTCCCAGCGAGGTGC	-1.52022	-0.354228	-0.322551	0.685206	0.980715	0.784517	1.21873	2.78442	1.964	2.15352
AQP11	AQP11_282679_1_44	GCTCAGCAGTTGCAGCTCGT	-0.242316	-0.274668	0.492198	-0.214597	-0.129772	0.784517	1.21873	2.78442	1.964	2.15352
AQP11	AQP11_282679_1_40	CGGCCTGTGCAGCTGCTGCC	-0.539549	0.670049	0.725903	-0.303277	-0.300798	0.784517	1.21873	2.78442	1.964	2.15352
AQP11	AQP11_282679_1_37	AGGTGTCCTGCAGCTCGGAC	0.509997	0.820611	0.500584	-0.229126	0.183713	0.784517	1.21873	2.78442	1.964	2.15352
AQP11	AQP11_282679_1_42	GGCTAGAAACTCCAGGACGA	-1.3748	0.573243	-0.787209	-0.00617528	-0.0190222	0.784517	1.21873	2.78442	1.964	2.15352
AQP11	AQP11_282679_1_46	TGGACGTGCCCACCAGAGTC	0.574265	0.617804	-0.394499	1.02223	1.38753	0.784517	1.21873	2.78442	1.964	2.15352
AQP11	AQP11_282679_1_39	CTGCTGCCGGGCGACTACGC	-0.894926	0.328008	0.158425	0.502018	0.71484	0.784517	1.21873	2.78442	1.964	2.15352
AQP11	AQP11_282679_1_17	GCTTGTGCATGGCCTGACTC	-1.53329	-1.26511	-0.93629	0.0255196	-0.613656	0.784517	1.21873	2.78442	1.964	2.15352
AQP11	AQP11_282679_1_10	CGGAGCCATGTCGCCGCTGC	-2.06044	0.142687	0.129102	0.124963	-0.485782	0.784517	1.21873	2.78442	1.964	2.15352
AQP11	AQP11_282679_1_12	CTCGCTGGGACTGATGCTGT	-0.802931	0.241654	0.142422	0.420904	0.606145	0.784517	1.21873	2.78442	1.964	2.15352
AQP11	AQP11_282679_1_16	TACTTCTTCTCGCTTGTGCA	-0.0152198	-0.129879	0.0198438	-0.202074	-0.0199852	0.784517	1.21873	2.78442	1.964	2.15352
AQP11	AQP11_282679_1_14	TCGCCCGGCAGCAGCTGCAC	-0.673818	-0.230287	0.0952945	-0.122789	-0.419565	0.784517	1.21873	2.78442	1.964	2.15352
AQP4	AQP4_361_2_12	GAGATGAGAACCATGTCGAC	1.11301	1.06541	0.910473	1.7081	0.93053	0.0112707	0	0	0	0.00343858
AQP4	AQP4_361_2_9	TGATGTGGCCACCGCTGATA	0.867157	0.642728	0.835779	-0.141376	0.503107	0.0112707	0	0	0	0.00343858
AQP4	AQP4_361_2_22	GCAACCATGGTGCAGTGCTT	0.412668	0.538256	0.303269	0.254113	0.129771	0.0112707	0	0	0	0.00343858
AQP4	AQP4_361_1_2	GTGACAGACCCACAGCAAGG	-0.341817	-0.0442033	-0.216376	-0.563955	0.221906	0.0112707	0	0	0	0.00343858
AQP4	AQP4_361_2_24	GTTCTCATCTCCCTTTGCTT	-0.952807	0.338397	-0.103139	0.0754358	0.0611216	0.0112707	0	0	0	0.00343858
AQP4	AQP4_361_2_27	AGCAGTCACAGCGGAATTTC	0.776377	0.616493	0.330278	1.56087	0.706139	0.0112707	0	0	0	0.00343858
AQP4	AQP4_361_2_29	CATCATGGTGGCTTTCAAAG	-0.189374	0.236736	0.211886	0.388782	0.120411	0.0112707	0	0	0	0.00343858
AQP4	AQP4_361_2_6	GATCTTCCTGGTGCACACCA	0.501291	0.751506	0.376255	-0.0828847	0.929539	0.0112707	0	0	0	0.00343858
AQP4	AQP4_361_2_28	GGGTCTGGACTCAAGCTTTC	0.0125262	0.105644	0.210211	0.527175	-0.0465468	0.0112707	0	0	0	0.00343858
AQP4	AQP4_361_2_11	CAATGCTGAGTCCAAAGCAA	0.386233	0.491699	-0.106886	0.466552	0.580565	0.0112707	0	0	0	0.00343858
AQP4	AQP4_361_2_21	TGCTTTGGCCATATCAGCGG	0.103481	-0.102171	0.0309347	-0.270435	0.0665612	0.0112707	0	0	0	0.00343858
AQP4	AQP4_361_2_25	AAAGCCTTTACCGGTCGACA	-0.653709	-0.26569	0.0952602	0.486645	1.03463	0.0112707	0	0	0	0.00343858
AQP4	AQP4_361_2_19	CTGTGGCCATGGTGTGCACC	0.481202	0.650446	0.83276	0.705472	0.954148	0.0112707	0	0	0	0.00343858
AQP4	AQP4_361_2_13	CCCAGTTGATGGTGGATCCC	0.48802	0.796527	0.551633	0.324998	0.326506	0.0112707	0	0	0	0.00343858
AQP4	AQP4_361_2_20	CCCTGCAGTGACTGTGGCCA	1.55963	1.57381	1.09157	0.96731	1.45141	0.0112707	0	0	0	0.00343858
AQP4	AQP4_361_2_30	TACCAGAGAGAACATCATGG	0.300435	0.410673	0.48186	0.608896	0.778647	0.0112707	0	0	0	0.00343858
AQP4	AQP4_361_2_14	AGCCACCATGATGTTCTCTC	-0.0410043	0.175001	0.149057	0.887579	0.891335	0.0112707	0	0	0	0.00343858
AQP4	AQP4_361_2_7	ACCATGGCCACAGTCACTGC	0.476442	0.15197	-0.0236189	-0.339484	0.955769	0.0112707	0	0	0	0.00343858
AQP4	AQP4_361_2_10	ATGGCCAAAGCACTGCACCA	0.810926	0.558818	0.694689	0.597259	1.18425	0.0112707	0	0	0	0.00343858
AQP4	AQP4_361_2_26	CTGGGATCCACCATCAACTG	0.915538	0.633024	0.710442	1.18964	0.809921	0.0112707	0	0	0	0.00343858
AR	AR_sgAR_6	GAAGCTTCTGGGTGTCACTA	0.839446	-0.40065	0.626227	0.546119	-0.120147	0.00336212	1.28697	0.00231748	0.0106986	0.486961
AR	AR_sgAR_5	ATCTGTGGAGATGAAGCTTC	1.99763	1.26657	0.845604	1.25411	0.745812	0.00336212	1.28697	0.00231748	0.0106986	0.486961
AR	AR_367_1_31	GCGCGAAGTGATCCAGAACC	1.40692	0.885128	1.21079	0.824272	0.946238	0.00336212	1.28697	0.00231748	0.0106986	0.486961
AR	AR_367_1_107	GGATCACTTCGCGCACGCTC	-1.01886	-0.647419	-0.979847	-0.851013	-1.07367	0.00336212	1.28697	0.00231748	0.0106986	0.486961
AR	AR_sgAR_9	GCAAGACCCTTTACCTTCAG	0.443435	0.893753	0.46219	-0.12722	0.544218	0.00336212	1.28697	0.00231748	0.0106986	0.486961
AR	AR_sgAR_2	GGTGGAAAGTAATAGTCAAT	-1.30439	-0.448295	-0.671864	0.075487	0.705661	0.00336212	1.28697	0.00231748	0.0106986	0.486961
AR	AR_367_1_28	AAGTGCAGTTAGGGCTGGGA	1.08426	1.15604	0.773214	1.1315	0.649257	0.00336212	1.28697	0.00231748	0.0106986	0.486961
AR	AR_367_1_121	CGGAGCAGCTGCTTAAGCCG	-0.0296978	0.585202	0.677943	0.57595	0.270998	0.00336212	1.28697	0.00231748	0.0106986	0.486961
AR	AR_367_1_119	TCATCCTCGTCCGGAGGTGC	-0.700302	0.657329	-0.433776	-1.22444	0.105915	0.00336212	1.28697	0.00231748	0.0106986	0.486961
AR	AR_367_1_109	AGCAGCAAACTGGCGCCGGG	0.995287	0.354263	0.812567	0.739243	0.220083	0.00336212	1.28697	0.00231748	0.0106986	0.486961
AR	AR_367_1_104	GCTCCTCGGTAGGTCTTGGA	0.447078	1.18012	0.0259087	0.168112	-0.260144	0.00336212	1.28697	0.00231748	0.0106986	0.486961
AR	AR_sgAR_10	CACAGGTACTTCTGTTTCCC	0.42934	0.483987	0.208604	0.306245	0.192824	0.00336212	1.28697	0.00231748	0.0106986	0.486961
AR	AR_367_1_102	TGCACTTCCATCCTTGAGCT	0.837416	0.628779	1.2744	0.040791	1.29555	0.00336212	1.28697	0.00231748	0.0106986	0.486961
AR	AR_367_1_115	AGGGCCGACTGCGGCTGTGA	0.440986	0.804044	1.01937	0.0291778	0.526493	0.00336212	1.28697	0.00231748	0.0106986	0.486961
AR	AR_sgAR_8	TCTCACATGTGGAAGCTGCA	0.592327	0.639102	0.730794	1.08676	1.54179	0.00336212	1.28697	0.00231748	0.0106986	0.486961
AR	AR_sgAR_4	TTCATCTCCACAGATCAGGC	0.104149	-0.138026	0.0802792	-0.142256	0.905913	0.00336212	1.28697	0.00231748	0.0106986	0.486961
AR	AR_sgAR_1	TTTCCAGTTTGGAGACTGCC	0.824716	1.11088	1.51101	1.28185	1.44557	0.00336212	1.28697	0.00231748	0.0106986	0.486961
AR	AR_sgAR_7	CACTATGGAGCTCTCACATG	-0.334007	-0.0617111	0.442601	-0.547972	0.458298	0.00336212	1.28697	0.00231748	0.0106986	0.486961
AR	AR_367_1_116	CTGGGACGCAACCTCTCTCG	-0.365072	0.247033	0.35099	0.334285	0.160227	0.00336212	1.28697	0.00231748	0.0106986	0.486961
AREL1	AREL1_9870_4_4	GGCGCTCGCGGTCCTCATTC	-1.50019	-1.07378	-0.64006	-0.914951	-0.824903	14.245	23.5633	19.8168	17.1765	9.72533
AREL1	AREL1_9870_4_9	CCCGGTCTTGCAAAGTCTCC	-1.26265	-0.257238	-0.221606	0.202991	0.67098	14.245	23.5633	19.8168	17.1765	9.72533
AREL1	AREL1_9870_8_3	CAGCAGTGGATGGCCGGCGC	1.23318	1.22122	2.00516	1.19881	1.22158	14.245	23.5633	19.8168	17.1765	9.72533
AREL1	AREL1_9870_5_5	AGTCCCACAGGCCGATGTGC	-0.0965472	-0.515961	0.512084	0.877203	0.795971	14.245	23.5633	19.8168	17.1765	9.72533
AREL1	AREL1_9870_6_4	AAGGGTGTGCGGCTGCCCAC	-2.47231	-1.19079	-0.778202	-1.22297	-0.405366	14.245	23.5633	19.8168	17.1765	9.72533
AREL1	AREL1_9870_8_9	GCCATCCACTGCTGTTGACG	-0.40392	0.289704	-0.233734	0.820008	-0.0577395	14.245	23.5633	19.8168	17.1765	9.72533
AREL1	AREL1_9870_8_6	CCATGGAGTGCTGCTACAGT	1.01234	0.462089	0.309464	0.439403	0.0426514	14.245	23.5633	19.8168	17.1765	9.72533
AREL1	AREL1_9870_5_11	TTCCCTGCACATCGGCCTGT	0.853834	-0.0666705	0.671627	0.420994	0.924141	14.245	23.5633	19.8168	17.1765	9.72533
AREL1	AREL1_9870_8_13	GAACGCAATGTGTCCACTTC	-0.264497	0.379121	-0.305831	0.658573	0.548471	14.245	23.5633	19.8168	17.1765	9.72533
AREL1	AREL1_9870_8_12	AGGCGTGAGCATTTACTTTG	0.606925	0.674202	1.03824	-0.587472	0.511589	14.245	23.5633	19.8168	17.1765	9.72533
AREL1	AREL1_9870_5_4	ATGTGAACTCTTAGTCCCAC	-0.521569	-0.667142	-0.60241	0.206541	-0.156737	14.245	23.5633	19.8168	17.1765	9.72533
AREL1	AREL1_9870_8_7	GTAAATGCTCACGCCTGAAG	-0.105519	-0.335196	-0.691561	-0.417942	-0.400742	14.245	23.5633	19.8168	17.1765	9.72533
AREL1	AREL1_9870_4_6	CACGTGCGGCAAGCTCAAAG	-0.925252	-0.244361	-0.407703	0.176259	-0.459211	14.245	23.5633	19.8168	17.1765	9.72533
AREL1	AREL1_9870_9_2	TCGGAAGGTGTAAAGGCGCC	-1.54298	-1.74384	-1.67485	-2.6876	-1.04496	14.245	23.5633	19.8168	17.1765	9.72533
AREL1	AREL1_9870_7_4	CCAGTACTCTCTTCTTCTTG	-0.312695	-0.924453	-0.0498754	0.193387	-0.146598	14.245	23.5633	19.8168	17.1765	9.72533
AREL1	AREL1_9870_7_5	CGACTCACCCTGCATTCTCG	-0.360987	0.139596	-0.17295	-0.160517	-0.219149	14.245	23.5633	19.8168	17.1765	9.72533
AREL1	AREL1_9870_8_11	CCAACTGTAGCAGCACTCCA	0.166754	0.822359	-0.213174	0.384826	-0.0844732	14.245	23.5633	19.8168	17.1765	9.72533
AREL1	AREL1_9870_5_2	CGTTGGAATTGGGCTCCTGA	0.683248	0.341802	-0.221902	0.676036	0.300957	14.245	23.5633	19.8168	17.1765	9.72533
AREL1	AREL1_9870_4_10	TGAGGACCGCGAGCGCCGAG	1.36757	1.22959	1.3382	1.12873	1.4269	14.245	23.5633	19.8168	17.1765	9.72533
AREL1	AREL1_9870_9_3	TACACCTTCCGAGTGTGTCC	-0.161841	-0.398187	-0.437305	-0.605808	0.0815454	14.245	23.5633	19.8168	17.1765	9.72533
ARHGAP18	ARHGAP18_93663_3_9	GCCGGTTTATCCAATCTCTT	0.211983	-1.01783	-0.498899	-0.587779	-0.869015	6.40822	13.7803	16.6361	6.81521	13.8358
ARHGAP18	ARHGAP18_93663_3_2	GCTTCTGAACTGCTGCTGCC	1.31612	0.959692	1.17584	2.52686	1.8371	6.40822	13.7803	16.6361	6.81521	13.8358
ARHGAP18	ARHGAP18_93663_1_10	GCTCTCCAGTTCCCAGGGAG	0.83212	-0.377659	0.170128	-0.245067	-0.42428	6.40822	13.7803	16.6361	6.81521	13.8358
ARHGAP18	ARHGAP18_93663_3_10	GAAGAGTGGCTTAAAGAGGC	-0.647001	0.523945	0.438677	0.333969	0.329355	6.40822	13.7803	16.6361	6.81521	13.8358
ARHGAP18	ARHGAP18_93663_1_4	GGAACTGGAGAGCCAGCTCA	0.208048	0.601699	0.956603	1.05324	0.603247	6.40822	13.7803	16.6361	6.81521	13.8358
ARHGAP18	ARHGAP18_93663_3_5	AGTTCAGAAGCGAGTAGAGA	1.38964	0.69364	0.842243	-0.418779	0.0596897	6.40822	13.7803	16.6361	6.81521	13.8358
ARHGAP18	ARHGAP18_93663_1_11	TCCCTTCTCTCACCATGAGC	-0.0487607	-1.67572	-0.580493	-0.843018	-0.0770187	6.40822	13.7803	16.6361	6.81521	13.8358
ARHGAP18	ARHGAP18_93663_2_2	CTTTGATGGTGGTGCTTTCC	0.934346	1.28394	0.953188	0.115463	0.441849	6.40822	13.7803	16.6361	6.81521	13.8358
ARHGAP18	ARHGAP18_93663_2_3	CAGCCAAGAAGATCAAGAGG	0.987961	0.229528	0.949941	0.711918	0.832549	6.40822	13.7803	16.6361	6.81521	13.8358
ARHGAP18	ARHGAP18_93663_3_7	AGAGTCTGCTGGAGATCCAC	1.30213	1.18904	0.766096	0.0609377	0.858679	6.40822	13.7803	16.6361	6.81521	13.8358
ARHGAP18	ARHGAP18_93663_1_3	AGGCTGTTAGTACCACTCCC	-0.090166	-0.183794	0.206031	0.319125	-0.399379	6.40822	13.7803	16.6361	6.81521	13.8358
ARHGAP18	ARHGAP18_93663_3_6	ATCAACATTGACGCGGACCC	1.47507	1.23739	0.292386	1.69078	1.50311	6.40822	13.7803	16.6361	6.81521	13.8358
ARHGAP18	ARHGAP18_93663_3_8	AATCTCTTCGGAGAGTCTGC	0.0924917	-0.191527	0.320069	0.302735	0.0315292	6.40822	13.7803	16.6361	6.81521	13.8358
ARHGAP18	ARHGAP18_93663_1_5	AGCCAGCTCATGGTGAGAGA	1.01346	0.142493	0.629649	0.452956	-0.0111487	6.40822	13.7803	16.6361	6.81521	13.8358
ARHGAP18	ARHGAP18_93663_1_1	CTTTGCATGGCTGTTCCCGA	0.70956	-0.142528	-0.224338	0.378292	-0.335482	6.40822	13.7803	16.6361	6.81521	13.8358
ARHGAP18	ARHGAP18_93663_2_1	CAACCACCTCTTGATCTTCT	0.781812	0.46309	1.40179	0.629821	1.24398	6.40822	13.7803	16.6361	6.81521	13.8358
ARHGAP18	ARHGAP18_93663_2_4	TGGCCAGTACACTATGAACC	0.00967442	-0.217734	0.498352	0.0357669	0.125884	6.40822	13.7803	16.6361	6.81521	13.8358
ARHGAP18	ARHGAP18_93663_3_3	AGCAGACTCTCCGAAGAGAT	1.97461	1.07055	1.49415	0.467184	1.90751	6.40822	13.7803	16.6361	6.81521	13.8358
ARHGEF1	ARHGEF1_9138_8_15	CCTCCTGCACGAACCGCCGC	-0.316891	-0.893981	0.303818	1.17148	0.557681	18.1293	42.5744	29.8794	27.1925	23.1043
ARHGEF1	ARHGEF1_9138_11_4	GGTTCCAGCGGGCGGCATCC	0.0951099	-0.58287	4.86016e-05	1.14087	-0.723611	18.1293	42.5744	29.8794	27.1925	23.1043
ARHGEF1	ARHGEF1_9138_11_2	GCATCCTGGATGCCGCCCGC	-0.463437	-0.34408	-1.22759	-1.27089	-1.17363	18.1293	42.5744	29.8794	27.1925	23.1043
ARHGEF1	ARHGEF1_9138_10_5	GTGGCGCATGTACAGGCCAA	1.18778	-0.258403	0.142421	-0.306842	-0.098554	18.1293	42.5744	29.8794	27.1925	23.1043
ARHGEF1	ARHGEF1_9138_8_7	GGCTCATGGGCATGACGCCC	0.184099	0.31126	0.735329	-0.454996	0.993979	18.1293	42.5744	29.8794	27.1925	23.1043
ARHGEF1	ARHGEF1_9138_10_2	GGCCTGTACATGCGCCACCT	-0.792436	-0.56217	-0.944168	-1.06548	-1.80176	18.1293	42.5744	29.8794	27.1925	23.1043
[truncated: 50,129 more rows]
