# Supplementary material for: CRISPR Screens Provide a Comprehensive Assessment of Cancer Vulnerabilities but Generate False-Positive Hits for Highly Amplified Genomic Regions
Source: Oxford University Press journal article supplement (doi:10.1158/2159-8290.cd-16-0178), 2016-06-03
Supplement: 21598290cd160178-sup-162212_1_supp_3485175_p6wyyc.xlsx [file 21598290cd160178-sup-162212_1_supp_3485175_p6wyyc.xlsx]

## Sheet: Sheet1
Gene Symbol	Count(Gene Symbol)	CRISPR Z-score Average	CleanName	Copy Number	shRNA average Z-score
AAAS	19	-0.81	dld1	0.032	-0.4774
AAMP	20	-2.54	dld1	0.0278	-1.23784
AATF	19	-1.56	dld1	0.015	-0.199526
ABL1	20	0.22	dld1	0.0388	-0.0467436
ACACA	19	-0.97	dld1	0.015	-0.652256
ACACB	18	0.16	dld1	0.032	-0.1875
ACOX3	19	0.21	dld1	-0.0222	-0.018525
ACTA2	18	-0.26	dld1	0.0233	0.102579
ACTL6A	19	-1.62	dld1	0.023	-0.314897
ACTL6B	18	-0.39	dld1	0.0251	-0.0932821
ACTR5	20	-0.77	dld1	0.0183	0.228975
ACTR6	18	-0.8	dld1	0.032	0.0969474
ACTR8	19	-1.02	dld1	0.0398	-0.0150513
ACVR1	18	0.3	dld1	0.0345	0.005
ACVR1B	18	0.25	dld1	0.032	0.29325
ACVR2A	20	0.04	dld1	0.0345	0.04695
ACVR2B	20	0.24	dld1	0.0398	0.0073
ACVRL1	20	0.19	dld1	0.032	0.173053
ADAM23	20	0.1	dld1	0.0439	-0.0124
ADAMTS10	20	0.05	dld1	0.026	-0.0462
ADAMTS20	20	-0.03	dld1	0.032	0.142
ADAMTSL3	20	0.02	dld1	0.0116	0.06195
ADAR	20	-0.9	dld1	0.0011	-0.217684
ADARB1	20	0.44	dld1	0.021	0.0697
ADCY7	20	0.04	dld1	-0.0238	0.0206923
ADIPOR1	20	-0.23	dld1	0.0242	0.16355
ADM	13	0.06	dld1	0.012	0.152389
ADM2	16	0.41	dld1	0.0203	-0.405067
ADNP	17	0.11	dld1	0.0183	0.105737
ADORA1	20	0.18	dld1	0.0242	-0.0230769
ADRBK1	20	-0.11	dld1	0.012	-0.174263
AEN	18	-0.32	dld1	0.0116	0.115158
AFF1	19	0.02	dld1	0.0405	0.15575
AFF4	18	0.31	dld1	0.0351	-0.19795
AFG3L2	19	-1.97	dld1	0.0071	-1.26855
AFP	18	0.31	dld1	0.0405	0.01935
AGTR1	20	0.28	dld1	0.023	0.042641
AHCTF1	20	-1.33	dld1	0.0073	-0.35195
AHI1	18	0.36	dld1	0.048	0.00663158
AHR	19	-0.04	dld1	0.1427	-0.157294
AHRR	18	0.28	dld1	0.0486	-0.134
AICDA	20	0.27	dld1	0.0441	0.0564444
AIRE	18	0.22	dld1	0.021	-0.112421
AK5	20	0.13	dld1	0.0007	0.134675
AKAP1	19	-0.61	dld1	0.015	0.1009
AKAP8	17	0.02	dld1	0.026	-0.264526
AKNA	20	0.33	dld1	0.0172	-0.30035
AKT1	19	-0.3	dld1	0.0281	-0.026
AKT2	18	-0.26	dld1	0.0107	-0.00157895
AKT3	20	0.53	dld1	0.0073	0.301789
ALG5	20	-0.03	dld1	0.0089	-0.0964103
ALKBH1	20	-0.24	dld1	0.0093	0.0613889
ALKBH2	20	0.17	dld1	0.032	-0.0740556
ALKBH3	20	0.41	dld1	0.012	0.0704
ALKBH5	20	-0.43	dld1	0.015	0.07915
ALKBH8	20	0.09	dld1	0.012	0.242895
ALPI	20	0.26	dld1	0.0278	-0.158647
ALPPL2	20	0.38	dld1	0.0278
ALS2	20	-0.13	dld1	0.0439	-0.2137
ALS2CL	18	0.15	dld1	0.0398	-0.0878421
ALX3	20	-0.13	dld1	0.0011	0.0411053
ALX4	20	0.26	dld1	0.012	-0.12645
AMBRA1	18	0.12	dld1	0.012	-0.222051
ANAPC1	20	-1.38	dld1	0.0861	-1.35142
ANAPC4	20	-2.41	dld1	-0.0222	-0.581421
ANGPTL4	17	0.01	dld1	0.026	-0.425658
ANK1	20	0.04	dld1	0.0246	0.117211
ANK2	20	0.09	dld1	0.0103	0.0557436
ANKLE2	20	-0.84	dld1	-0.0614	0.23205
ANKRD29	18	0.1	dld1	0.0071	0.0562308
ANKS6	19	-0.35	dld1	0.0172	-0.159316
ANPEP	20	0.56	dld1	0.0116	-0.135821
ANXA4	20	0.09	dld1	0.5281	0.348211
AP2M1	20	-1.77	dld1	0.023	-1.65137
APAF1	20	0.34	dld1	0.032	0.3427
APMAP	18	0.33	dld1	0.0183	-0.235875
AQP11	20	-0.17	dld1	0.012	-0.177825
AR	19	0.29	dld1		0.0940385
ARHGAP18	18	0.39	dld1	0.048	-0.169974
ARHGEF17	18	-0.02	dld1	0.012	-0.00552632
ARHGEF3	19	0.22	dld1	0.0398	0.012
ARHGEF33	18	-0.24	dld1	0.6035	0.0276
ARHGEF37	20	0.32	dld1	0.0351	0.0147368
ARHGEF38	18	0	dld1	0.0405	0.0120833
ARHGEF4	18	0.2	dld1	-0.0289	0.0308947
ARHGEF40	20	0.13	dld1	0.0093	-0.0693158
ARHGEF5	32	-0.2	dld1	0.0105	0.0649333
ARID1A	19	-1.11	dld1	0.0319	-0.355757
ARID1B	20	0.18	dld1	0.0054	-0.0805833
ARID2	20	-0.68	dld1	0.032	0.0112821
ARID3A	20	0.05	dld1	0.026	-0.146639
ARID3B	20	0.13	dld1	0.0318	0.0401842
ARID3C	20	0.18	dld1	0.0172	0.121571
ARID4A	20	0.52	dld1	0.0093	0.269211
ARID4B	18	0.58	dld1	0.0073	0.232568
ARID5A	20	-0.6	dld1	0.0029	0.0831071
ARID5B	18	-0.2	dld1	0.0233	0.062375
ARNT	20	-0.41	dld1	0.0011	0.0721892
ARNTL	20	0.41	dld1	0.012	0.00025
ARNTL2	20	-0.31	dld1	-0.0127	-0.100053
ARPC1A	13	-0.1	dld1	0.0251	0.07205
ARPC1B	20	0.02	dld1	0.0251	-0.0414737
ART3	20	0.01	dld1	0.0405	0.00325641
ARX	20	0.23	dld1		-0.0246316
ASCL1	18	0.13	dld1	0.032	-0.0374737
ASF1A	34	-0.39	dld1	0.0163	-0.00995
ASF1B	20	-0.13	dld1	0.026	0.158947
ASGR1	20	0.22	dld1	0.015	-0.235025
ASH1L	20	0.3	dld1	0.0011	0.0287333
ASH2L	20	-1.02	dld1	0.0246	0.22581
ASNS	18	-0.09	dld1	0.0251	0.231105
ASPH	20	-0.04	dld1	-0.0329	0.117303
ASPHD2	20	0.17	dld1	0.0203
ASXL1	20	0.05	dld1	0.0183	-0.203265
ASXL2	20	0.01	dld1	0.0066	-0.01545
ASXL3	19	0.64	dld1	0.0071	0.00105
ATAD2	18	-0.23	dld1	0.022	0.235069
ATAT1	20	0.06	dld1	0.0049	0.216632
ATF1	20	-0.07	dld1	0.032	-0.09165
ATF2	20	-0.09	dld1	0.0345	0.22665
ATF3	19	0.26	dld1	0.0242	-0.1594
ATF4	17	-0.17	dld1	0.0203	-0.02775
ATF5	20	0.07	dld1	0.0107	0.03715
ATF6	20	-0.16	dld1	0.0011	0.056
ATG10	18	-0.06	dld1	0.0341	-0.31165
ATG12	19	-0.08	dld1	-0.0072	-0.144939
ATG13	20	-0.15	dld1	0.012	-0.260775
ATG16L1	20	0.15	dld1	0.0278	-0.0244615
ATG16L2	18	0.18	dld1	0.012	-0.0917368
ATG2A	20	-0.05	dld1	0.012	-0.00935
ATG2B	19	0.16	dld1	-0.037	-0.15641
ATG3	20	0.12	dld1	-0.0174	0.0431351
ATG4A	20	0.4	dld1		0.0693077
ATG4B	19	0.11	dld1	0.0278	0.0914865
ATG4C	48	0.44	dld1	0.0633	-0.107216
ATG4D	19	-0.32	dld1	0.026	0.018875
ATG5	19	0.03	dld1	0.0163	0.0714872
ATG7	20	0.16	dld1	0.0418	-0.01225
ATG9A	20	-0.98	dld1	0.0278	-0.112025
ATG9B	20	0	dld1	0.0105	0.0263333
ATM	20	0	dld1	0.012	-0.0920667
ATOH1	20	0.09	dld1	0.0405	-0.148
ATOH7	20	-0.29	dld1	0.0233	-0.0954737
ATP6V1B2	19	-2.18	dld1	0.0246	-0.349842
ATP6V1G2	20	0.16	dld1	0.0049	0.0286316
ATR	19	-1.37	dld1	0.023	0.0164304
ATRNL1	18	0.16	dld1	0.0353	0.14295
ATRX	19	0.18	dld1		-0.1542
AURKB	20	-0.94	dld1	0.015	-0.250415
AXIN1	20	0.37	dld1		-0.2023
AXL	20	0.05	dld1	0.0107	0.124333
B2M	14	0.19	dld1	0.0471	0.29335
B9D1	18	0.07	dld1	0.015	-0.283947
BACH2	20	0.14	dld1	0.0163	-0.15605
BAG3	20	0.49	dld1	0.0353	-0.0333
BAI3	20	0.19	dld1	0.0163	-0.008875
BAIAP2	20	-0.05	dld1	0.015	-0.2491
BARHL1	18	0.34	dld1	0.0388	-0.036
BARHL2	20	0	dld1	0.0007	-0.26795
BARX1	18	0.15	dld1	0.0172	-0.206263
BARX2	17	-0.03	dld1	0.012	-0.0496316
BATF	20	0.19	dld1	0.0093	-0.1
BAX	19	0.17	dld1	0.0107	-0.526294
BAZ1A	20	0.6	dld1	0.0093	0.322516
BAZ1B	20	-0.6	dld1	0.0251	0.0586061
BAZ2A	18	-0.33	dld1	0.032	0.0667353
BAZ2B	18	0.16	dld1	0.0345	0.225424
BBC3	18	0.13	dld1	0.0107	0.19735
BBOX1	19	0.36	dld1	0.012	0.4411
BCAR1	20	-0.05	dld1	0.0202	-0.52355
BCAR3	17	0.22	dld1	0.1099	0.140719
BCAS3	19	-0.12	dld1	0.015	0.0988
BCDIN3D	20	-0.2	dld1	0.032	-0.1973
BCL2L14	19	0.23	dld1	0.0441	-0.09405
BCL2L2	20	0.03	dld1	0.0093	0.150143
BCL3	20	0.15	dld1	0.0107	-0.0458947
BCL6	20	0.45	dld1	0.023	0.0511667
BDP1	18	-1.5	dld1	0.0341	-0.117105
BECN1	20	-0.55	dld1	0.015	-0.0291579
BIRC5	18	-2.3	dld1	0.015	-0.423729
BIRC6	18	-0.46	dld1	0.5148	-0.386
BIRC7	18	0.01	dld1	0.0183	-0.46445
BLCAP	20	-0.1	dld1	0.0183	-0.2664
BLZF1	19	0.32	dld1	0.0011	-0.189278
BMP2	20	0.12	dld1	0.0438	-0.0536667
BMP4	20	-0.04	dld1	0.0093	-0.0087
BMPR1A	274	0.21	dld1	0.0233	0.0541
BMPR1B	17	0.21	dld1	0.0405	-0.125836
BMPR2	18	-0.39	dld1	0.0439	-0.1234
BNC1	18	0.21	dld1	0.0116	-0.1906
BNIP1	20	-1.19	dld1	0.012	-0.3449
BNIP3	14	0.18	dld1	-0.0416	-0.2965
BNIP3L	18	0.12	dld1	0.0246	-0.17775
BOP1	20	-2.23	dld1	0.0277	-1.5538
BRAF	20	-0.02	dld1	0.0105	-0.0527692
BRCA1	20	-1.23	dld1	0.015	-0.213105
BRD1	20	0.21	dld1	0.0203	0.1145
BRD2	20	-1.5	dld1	0.0049	0.00493333
BRD3	19	-0.09	dld1	0.0388	0.187182
BRD4	20	-1.26	dld1	0.026	-0.949517
BRD7	34	-0.15	dld1	-0.0238	-0.0626667
BRD8	18	-1.09	dld1	0.0351	-0.0118621
BRD9	18	-0.11	dld1	0.0486	-0.148724
BRDT	20	0.12	dld1	0.0007	0.197774
BRMS1	20	-0.11	dld1	0.012	-0.1249
BRMS1L	20	0.04	dld1	0.0093	-0.140474
BRPF1	20	-0.17	dld1	0.0418	-0.195059
BRPF3	20	0.21	dld1	0.0049	-0.1124
BRSK1	19	0.07	dld1	0.0107	0.01285
BRSK2	20	0.31	dld1	0.5737	0.152333
BRWD1	18	-0.05	dld1	0.021	-0.0863871
BRWD3	20	0.02	dld1		0.0511212
BTAF1	19	-1.48	dld1	0.0233	-0.0660526
BTD	20	-0.09	dld1	0.0418	-0.0134
BTF3	34	-0.16	dld1	0.0341	-0.335765
BTG2	19	-0.15	dld1	0.0242	-0.1053
BTN3A1	20	0.26	dld1	0.0049	-0.138786
BTNL8	18	0.23	dld1	0.012	-0.311259
BTNL9	19	0.5	dld1	0.012	-0.08145
BTRC	19	0.08	dld1	0.0233	0.271222
BUB1	20	-0.87	dld1	0.0861	-0.1289
BUB3	19	-3.03	dld1	0.0353	-0.204632
BUD31	20	-2.72	dld1	0.0251	-0.365053
C11orf70	20	0.32	dld1	0.012	-0.1242
C12orf5	20	0.26	dld1	0.0441	-0.0736389
C14orf169	20	0.06	dld1	0.0093	0.158605
C17orf80	19	0.16	dld1	0.015	-0.070125
C1QBP	19	-1.39	dld1	0.015	-0.48945
C3orf38	18	-0.26	dld1	-0.0174	0.00557895
C8orf86	18	0.24	dld1	0.0246	0.0655263
C9orf24	20	-0.25	dld1	0.0172	-0.244053
CABLES2	18	-0.23	dld1	0.0183	-0.19355
CACNA1A	19	-0.03	dld1	0.026	0.0990769
CACNA1G	20	0.14	dld1	0.015	-0.0448889
CACNA1H	17	-0.17	dld1		-0.05575
CACNB2	18	-0.17	dld1	0.0016	-0.16905
CALCOCO2	20	0.23	dld1	0.015	-0.257263
CAMKK2	20	-0.11	dld1	0.032	-0.079525
CAPN1	20	0.01	dld1	0.012	-0.00452632
CAPN10	20	0.28	dld1	0.0278	-0.25535
CAPN2	16	0.31	dld1	0.0073	-0.1596
CAPNS1	19	0.1	dld1	0.0107	-0.1297
CARM1	18	-0.58	dld1	0.026	0.296381
CASD1	20	0.33	dld1	0.0251	0.189333
CASP14	16	0.13	dld1	0.026	0.171667
CASP5	18	0.52	dld1	0.012	0.0198947
CASP8AP2	20	-1.64	dld1	0.0163	-0.267316
CASR	20	0.19	dld1	0.023	-0.0638421
CAV1	18	0.1	dld1	0.0105	-0.081175
CAV3	16	0.6	dld1	0.0418	-0.1174
CBFA2T2	20	-0.06	dld1	0.0183	-0.263765
CBFB	18	0.48	dld1	0.0058	0.152316
CBX2	20	-0.35	dld1	0.015	-0.0506207
CBX4	19	0.06	dld1	0.015	-0.0502105
CBX5	19	-0.23	dld1	0.032	0.0372105
CBX6	19	-0.34	dld1	0.0203	-0.214684
CBX7	20	0.08	dld1	0.0203	-0.102553
CBX8	20	-0.15	dld1	0.015	0.183571
CCDC101	16	-0.85	dld1	-0.0238	-0.0327
CCDC47	18	-0.29	dld1	0.015	-0.095125
CCDC79	18	0.24	dld1	-0.0238	0.332526
CCL2	30	0.56	dld1	0.015	0.04525
CCND1	16	-2.19	dld1	0.012	-1.01925
CCND2	20	0.29	dld1	0.0441	0.148158
CCND3	18	0.1	dld1	0.0049	-0.164053
CCNE1	20	-0.09	dld1	-0.0895	-0.0292222
CCNG1	34	0.06	dld1	-0.0509	-0.165842
CCR7	20	0.25	dld1	0.015	-0.0846441
CCRN4L	17	-0.02	dld1	0.0103	-0.0366
CCT2	20	-1.48	dld1	0.032	-0.436789
CCT3	19	-1.76	dld1	0.0011	-1.17175
CCT7	19	-2.08	dld1	0.0029	-1.2016
CD22	20	-0.04	dld1	0.0107	-0.103154
CD36	18	0.13	dld1	0.0251	-0.0585263
CD69	34	0.31	dld1	0.0441	0.189667
CD79B	18	-0.02	dld1	0.015	-0.1294
CDC20	19	-1.57	dld1	0.0319	-0.134895
CDC20B	19	-0.03	dld1	0.0531	-0.254316
CDC23	20	-1.58	dld1	0.0351	-0.331895
CDC25B	19	-0.49	dld1	0.0438	-0.48905
CDC37	19	-2	dld1	0.026	-0.559368
CDC40	20	-1.2	dld1	0.0163	-0.71375
CDC42	19	0.2	dld1	0.0319	0.0310345
CDC7	20	-2.22	dld1	0.0007	-0.5154
CDCP1	20	0.14	dld1	0.0398	-0.1665
CDH1	20	0.05	dld1	0.0202	0.0603
CDH12	20	0.15	dld1	-0.0102	-0.3397
CDH15	18	-0.06	dld1	0.0202	-0.304353
CDH2	20	0.03	dld1	0.0071	0.344474
CDH6	19	0.34	dld1	-0.0102	0.0888947
CDK2	18	-1.06	dld1	0.032	-0.397471
CDK6	20	-0.49	dld1	0.0251	-0.23331
CDK7	17	-1.25	dld1	0.0341	0.129158
CDK9	18	-2.59	dld1	0.0388	0.0302857
CDKL5	20	0.46	dld1		-0.0384211
CDKN1A	20	0.13	dld1	0.0049	-0.02
CDKN1B	18	0.2	dld1	0.0441	0.1495
CDKN2A	20	0.27	dld1	0.0172	-0.0394722
CDKN2B	18	-0.33	dld1	0.0172	-0.0897895
CDKN2C	18	0.3	dld1	0.0319	0.0818889
CDKN2D	18	-0.36	dld1	0.026	0.00951282
CDX1	20	0.1	dld1	0.0351	-0.38855
CDX2	20	-0.73	dld1	0.0089	0.122081
CDX4	18	0.17	dld1		-0.17215
CDYL	20	0.2	dld1	-0.7609	0.1169
CDYL2	20	0.2	dld1	0.0202	0.2451
CEACAM1	18	-0.19	dld1	0.0107	-0.109222
CEACAM3	19	0.16	dld1	0.0107
CEACAM4	34	0.06	dld1	0.0107	-0.304556
CEACAM5	20	0.15	dld1	0.0107	-0.050439
CEACAM6	32	-0.25	dld1	0.0107	-0.4385
CEBPA	18	-0.24	dld1	0.0107	-0.174333
CEBPB	20	-0.04	dld1	0.0183	-0.00163636
CEBPD	20	-0.21	dld1	0.0246	-0.182
CEBPG	34	0.11	dld1	0.0107	-0.3148
CEBPZ	20	-1.43	dld1	0.6035	-0.0852105
CECR2	20	0.16	dld1	0.0203	0.0374211
CELSR1	18	-0.3	dld1	0.0203	-0.0736667
CENPA	17	-2.35	dld1	0.0969	0.0982
CENPW	48	-2.2	dld1	0.048	-0.0993
CFL1	19	-1.45	dld1	0.012	-0.991385
CHAF1A	19	-0.94	dld1	0.026	-0.4521
CHAF1B	16	-1.6	dld1	0.021	-0.402421
CHD1	19	-0.48	dld1	-0.0072	-0.0796
CHD2	19	0.16	dld1	0.0116	-0.00985
CHD4	20	-1.28	dld1	0.0441	-0.7658
CHD5	19	-0.07	dld1	-0.0145	-0.0604595
CHD6	20	0.41	dld1	0.0183	0.34685
CHD7	20	-0.1	dld1	-0.0329	0.2038
CHD8	20	0.18	dld1	0.0093	-0.0366
CHD9	20	0.3	dld1	-0.0238	0.126263
CHRAC1	20	-0.36	dld1	0.0277	0.204118
CHRD	20	0.25	dld1	0.023	0.0176
CHRM3	18	0.18	dld1	0.0073	-0.0755143
CHRNA1	20	0.13	dld1	0.0345	-0.047675
CHRND	20	0.12	dld1	0.0278	-0.392744
CHUK	20	-0.03	dld1	0.0233	-0.2441
CIRH1A	20	-2.81	dld1	0.0202	-0.591684
CITED1	20	0.52	dld1		-0.368579
CITED2	20	-0.59	dld1	0.048	-0.27375
CKAP5	20	-2.37	dld1	0.012	-1.75615
CKS1B	32	-1.01	dld1	0.0011	-0.0299474
CLCA2	20	0.18	dld1	0.0007	-0.197525
CLDN14	18	0.2	dld1	0.021	-0.0797
CLDN16	20	0.4	dld1	0.023	0.30195
CLDN18	20	0.24	dld1	0.023	-0.0218947
CLEC12A	20	0.2	dld1	0.0441	-0.134789
CLEC1A	20	0.45	dld1	0.0441	0.241579
CLEC5A	13	0.39	dld1	0.0105	0.151421
CLEC7A	20	0.1	dld1	0.0441	-0.14695
CLNS1A	18	-1.62	dld1	0.012	-0.610263
CLOCK	20	0.35	dld1	0.0451	0.198025
CLPTM1L	20	0.35	dld1	-0.1138	-0.214895
CLRN3	20	0.41	dld1	-0.0416	-0.165
CLSPN	20	-0.61	dld1	0.0319	-0.4925
CLTA	16	0.15	dld1	0.0172	-0.42265
CLTC	18	-2.2	dld1	0.015	-0.964525
CNGA3	20	0.06	dld1	0.0029	-0.238514
CNKSR1	20	0.04	dld1	0.0319	-0.0233333
CNOT7	20	0.35	dld1	0.0246	-0.0229
CNOT8	18	0.31	dld1	-0.0509	-0.21465
CNR1	20	0.15	dld1	0.0163	-0.167385
CNTNAP2	20	0.2	dld1	0.0105	-0.26195
COPA	20	-2	dld1	0.0011	-0.910579
COPB2	20	-1.3	dld1	0.023	-1.65026
COPS5	18	-2.28	dld1	-0.0329	-0.671325
CORO1B	18	-0.5	dld1	0.012	-0.199353
CORO1C	18	-0.03	dld1	0.032	0.106632
CORO2A	20	0.09	dld1	0.0172	-0.26725
CORO2B	20	-0.07	dld1	0.0318	-0.129059
CORO6	18	-0.3	dld1	0.015	0.138105
CORO7	18	-0.52	dld1	0.0617	-0.144294
CPB2	18	0.19	dld1	0.0089	-0.113316
CPM	20	0.18	dld1	0.032	0.127464
CR2	20	-0.07	dld1	0.0242	-0.444079
CRABP1	20	0.15	dld1	0.0116	0.0387368
CREB1	20	0.11	dld1	0.0439	0.0051
CREB3	18	-0.02	dld1	0.0172	-0.381263
CREB3L1	20	0.03	dld1	0.012	-0.28185
CREB3L2	20	0.08	dld1	0.0105	-0.2615
CREB3L4	16	0.28	dld1	0.0011	-0.0413158
CREBBP	18	0.06	dld1	0.0617	0.224969
CREBL2	20	0.24	dld1	0.0441	-0.26935
CSDE1	20	0.06	dld1	0.0011	0.205947
CSK	20	-0.26	dld1	0.0318	-0.0146923
CSNK1A1	18	-1.32	dld1	0.0351	-0.44455
CSNK2A1	16	-0.12	dld1	0.0438	0.0016087
CSPG4	20	0.15	dld1	0.0318	0.0934444
CSRNP3	20	0.18	dld1	0.0345	-0.244421
CSTF1	20	-2.09	dld1	0.0183	0.0317
CTBP1	20	0.22	dld1	-0.0222	-0.0708718
CTBP2	20	0.05	dld1	0.0353	0.106667
CTCF	20	-2.13	dld1	0.0202	-0.452526
CTDP1	19	-1.41	dld1	-0.0135	0.0912222
CTGF	20	0.09	dld1	0.048	-0.352231
CTNNB1	20	-1.01	dld1	0.0398	-1.38765
CTNNBIP1	18	0.23	dld1	0.0319	-0.23025
CTSB	20	0.44	dld1	0.0246	-0.149632
CTSD	19	-0.09	dld1	0.5737	0.1248
CTSL	18	-0.11	dld1	0.0172
CXCL12	20	0.12	dld1	-0.0529	-0.205526
CXCR6	19	0.4	dld1	0.0398	-0.159128
CXorf21	20	0.33	dld1		-0.20165
CXXC1	20	-0.37	dld1	-0.0135	0.1463
CYB561	16	-0.07	dld1	0.015	-0.235795
CYC1	17	-0.64	dld1	0.0277	0.0198333
CYP24A1	18	-0.11	dld1	0.0183	0.109
CYR61	18	-0.06	dld1	0.0007	0.0907692
DACH1	20	0.13	dld1	0.0089	-0.13235
DAPK1	20	0.33	dld1	0.0172	0.02525
DAPK2	20	0.51	dld1	0.0318	-0.0116757
DAZAP1	18	-0.24	dld1	0.026	-0.03875
DBP	20	-0.06	dld1	0.0107	-0.16395
DCAF10	19	0.17	dld1	0.0172	0.106316
DCAF11	20	-0.18	dld1	0.0093	0.02655
DCAF12L2	20	0.08	dld1		0.09615
DCAF13	20	-0.27	dld1	0.022	-0.495211
DCAF4	20	0.09	dld1	0.0093	0.0915
DCAF4L1	20	0.37	dld1	-0.0222	-0.0923143
DCAF4L2	20	-0.06	dld1	0.022	0.00958824
DCAF5	20	-0.09	dld1	0.0093	0.207833
DCAF6	20	0.17	dld1	0.0011	-0.074
DCAF7	20	-0.42	dld1	0.015	-0.45885
DCAF8L1	18	0.31	dld1		-0.137944
DCAF8L2	18	0	dld1
DCLRE1C	18	0.05	dld1	0.0016	-0.238125
DDIT3	17	-0.29	dld1	0.032	-0.167263
DDR1	20	0.37	dld1	0.0049
DDX17	20	-0.03	dld1	0.0203	-0.302235
DDX21	20	-0.92	dld1	0.0233	-0.849474
DDX27	20	-1.58	dld1	0.0183	-1.1375
DDX47	20	-1.77	dld1	0.0441	-0.7012
DDX5	20	-0.62	dld1	0.015	-0.00105263
DDX58	18	0.3	dld1	0.0172	0.02595
DEAF1	18	0.02	dld1	0.5737	-0.20605
DENND3	19	0.16	dld1	0.0277	-0.0916842
DGUOK	18	0.01	dld1	0.0029	-0.278475
DHRS7C	17	0.11	dld1	0.015	-0.115487
DHX38	19	-1.09	dld1	0.0202	-0.966175
DHX9	20	-1.33	dld1	0.0011	-1.26795
DICER1	20	0.15	dld1	-0.037	-0.09795
DIDO1	20	-0.63	dld1	0.0183	0.165368
DLG1	18	0.67	dld1	0.023	-0.428308
DLG5	18	0.04	dld1	0.0233	-0.14795
DLK1	20	0	dld1	-0.037	0.025925
DLST	20	-0.82	dld1	0.0093	-0.329316
DLX1	20	-0.01	dld1	0.0345	-0.00135
DLX2	20	-0.22	dld1	0.0345	0.0574
DLX3	17	-0.1	dld1	0.015	-0.01265
DLX4	20	0.31	dld1	0.015	-0.12055
DLX5	20	-0.27	dld1	0.0251	-0.218
DLX6	18	0.11	dld1	0.0251	0.003
DMAP1	20	-1.3	dld1	0.0319	0.18755
DMBX1	20	0.18	dld1	0.0319	0.0095
DMRT1	18	0.3	dld1	0.0172	-0.1997
DMRT2	19	0.51	dld1	0.0172	0.0542632
DMRT3	18	0.38	dld1	0.0172	-0.07545
DMRTA1	19	-0.09	dld1	0.0172	0.17375
DMTF1	20	0.2	dld1	0.0251	0.252684
DMWD	20	-0.19	dld1	0.0107	0.0525263
DMXL1	17	0.02	dld1	-0.0072	0.0013
DMXL2	17	-0.38	dld1	0.0318	-0.146
DNAI1	19	-0.21	dld1	0.0172	-0.275263
DNAI2	18	0.01	dld1	0.015	-0.216684
DNAJC1	18	0.01	dld1	0.0016	0.1653
DNAJC2	20	-0.72	dld1	0.0251	-0.02555
DNAJC5	20	0.08	dld1	0.0183	-0.23065
DNMBP	20	0.28	dld1	0.0233	0.13845
DNMT1	20	-0.85	dld1	0.026	-0.2012
DNMT3A	19	-0.14	dld1	-0.0105	0.1819
DNMT3B	18	-0.12	dld1	0.0183	0.0364211
DNMT3L	20	0.34	dld1	0.021	0.0146
DOCK10	19	0.05	dld1	0.0278	-0.0398
DOCK11	20	0.25	dld1		0.24556
DOCK2	20	0.28	dld1	0.012	0.141111
DOT1L	19	-1.52	dld1	0.026	0.0670256
DPF1	18	-0.38	dld1	0.0107	0.0490256
DPF2	20	-0.21	dld1	0.012	-0.098
DPF3	18	0.33	dld1	0.0093	0.0795128
DPP10	20	0.09	dld1	-0.0151	-0.19675
DPP9	18	-0.17	dld1	0.026	0.275579
DPY19L3	18	0.25	dld1	0.0107	-0.273919
DRAP1	19	-2.34	dld1	0.012	-0.0961
DSG3	20	0.3	dld1	0.0071	0.019475
DTL	20	-1.66	dld1	0.0242	0.19815
DUOX2	20	-0.22	dld1	0.0471	-0.264158
DYNC1I1	19	0.22	dld1	0.0251	-0.04865
DYNC1I2	20	-1.47	dld1	0.0345	-0.341053
DYRK4	20	0.13	dld1	0.0441	-0.346744
E2F1	20	0.2	dld1	0.0183	0.108703
E2F2	19	-0.36	dld1	0.0319	-0.361389
E2F3	17	-0.14	dld1	0.0049	-0.2288
E2F4	20	-0.23	dld1	0.0202	-0.2123
E2F5	19	0.14	dld1	0.022	-0.643632
E2F6	20	0.22	dld1	0.0868	-0.14865
E2F8	20	-0.02	dld1	0.012	-0.0885263
ECT2L	20	0.16	dld1	0.048	-0.2991
EDC4	19	0	dld1	0.0202	-0.24895
EDN1	20	0.1	dld1	0.0049	-0.225718
EDN2	20	-0.03	dld1	0.0319	-0.25895
EDNRA	18	0.07	dld1	0.0103	-0.0272
EED	19	-0.99	dld1	0.012	-0.346342
EEF2	20	-2.7	dld1	0.026	-0.365
EFNA2	18	-0.08	dld1	0.026	-0.02815
EGFR	19	-1.12	dld1	0.0171	-0.0300333
EGLN1	18	0.16	dld1	0.0073	0.19313
EGLN2	16	0.11	dld1	0.0107	-0.000236842
EGLN3	20	0.21	dld1	0.0093	-0.120895
EGR1	20	-0.17	dld1	0.0351	-0.18465
EGR2	20	0.37	dld1	0.0233	-0.10915
EGR3	20	0.04	dld1	0.0246	-0.396722
EHF	20	0.09	dld1	0.012	-0.00585
EHMT1	20	0.25	dld1	0.0388	-0.20885
EHMT2	20	-0.47	dld1	0.0049	-0.270941
EIF2AK1	18	0.3	dld1	0.0109	-0.111829
EIF4A1	20	-1.66	dld1	0.015	-0.406095
EIF4E	18	-0.72	dld1	0.0405	-0.678364
EIF5A	20	-0.21	dld1	0.015
EIF5A2	26	0.33	dld1	0.023	-0.149974
ELAC2	18	-1.71	dld1	0.015	-0.14295
ELAVL4	20	0.07	dld1	0.0319	-0.322132
ELF1	20	-0.49	dld1	0.0089	-0.286278
ELF2	20	-0.17	dld1	0.0103	-0.07745
ELF3	15	0.1	dld1	0.0242	-0.0539
ELK1	18	0.1	dld1		0.0145
ELK3	19	0.38	dld1	0.032	-0.0247
ELL	18	-1.93	dld1	0.026	0.0355556
ELP2	20	-1.4	dld1	0.0071	-0.13255
ELP3	20	-1.54	dld1	0.0246	0.00715
EML1	16	0.03	dld1	-0.037	-0.208842
EML2	20	-0.06	dld1	0.0107	0.1328
EML3	20	-0.25	dld1	0.012	-0.2317
EML4	18	-0.24	dld1	0.6035	0.0464737
EML5	16	0.4	dld1	-0.037	0.00984211
EML6	20	-0.12	dld1	0.5281	0.0162632
EMX1	20	-0.3	dld1	0.0029	-0.05305
EMX2	20	0.07	dld1	0.0353	-0.268474
EN1	18	0.06	dld1	-0.0151	-0.12515
EN2	20	0.24	dld1	0.0105	0.0755
ENPP3	20	0.02	dld1	0.048	-0.16141
ENPP7	20	0.19	dld1	0.015	-0.26185
EOMES	20	-0.28	dld1	0.0031	-0.04785
EP300	20	-0.26	dld1	0.0203	-0.116133
EP400	19	-0.34	dld1	-0.0614	-0.247973
EPAS1	18	-0.25	dld1	0.6035	-0.180025
EPC1	20	-0.36	dld1	0.0261	0.1581
EPHA6	20	0.39	dld1	-0.0174	-0.174
EPHA7	19	0.15	dld1	0.0163	0.0524667
EPOR	19	-0.14	dld1	0.026	-0.333769
ERCC6	18	0.15	dld1	-0.0529	-0.108579
ERCC8	18	-0.09	dld1	0.0341	0.213421
ERG	20	0.41	dld1	0.021	-0.0340698
ERN1	20	0.27	dld1	0.015	0.116158
ERN2	20	-0.58	dld1	-0.0238	0.0953158
ESR1	20	0.23	dld1	0.0054	0.0947241
ESR2	20	0.18	dld1	0.0093	-0.0902
ESRRA	15	-0.6	dld1	0.012	-0.39095
ESRRB	20	0.32	dld1	0.0093	-0.26355
ESRRG	20	0.22	dld1	0.0242	0.0259474
ESX1	18	0.4	dld1		-0.157556
ETS1	20	0.58	dld1	0.012	0.0581
ETS2	20	0.49	dld1	0.021	-0.1771
ETV1	20	0.14	dld1	0.0109	-0.34245
ETV4	20	-0.17	dld1	0.015	0.0291
ETV6	20	0.09	dld1	0.0441	-0.02115
EVX1	20	0.05	dld1	0.0171	-0.33615
EXOC2	16	-0.65	dld1	-0.7609	-0.1154
EXOC8	19	-1.37	dld1	0.0073	0.13425
EZH1	20	-0.15	dld1	0.015	0.1475
EZH2	19	-0.23	dld1	0.0105	-0.171641
F13A1	20	0.25	dld1	-0.7609	-0.243316
F2RL1	19	-0.17	dld1	0.0341	0.114459
F2RL2	18	0.24	dld1	0.0341	-0.072075
FAIM3	18	0.2	dld1	0.0242	-0.4017
FAM91A1	18	-0.18	dld1	0.022	0.12945
FARP2	17	0.21	dld1	0.0278	0.128474
FASN	20	-0.51	dld1	0.015	-0.507463
FAT3	20	0.15	dld1	0.012	-0.11255
FBXL20	20	0.18	dld1	0.015	0.10015
FBXO11	20	-0.41	dld1	0.5281	0.0870513
FBXW10	15	0.16	dld1	0.015
FBXW11	18	0.04	dld1	0.012	0.103737
FBXW2	20	0.22	dld1	0.0388	0.0915
FBXW5	20	-0.07	dld1	0.0388	0.122667
FBXW7	20	0.03	dld1	0.0103	0.09375
FBXW8	20	-0.05	dld1	0.032	0.3333
FBXW9	20	-0.47	dld1	0.026	-0.110789
FCGR2B	20	-0.02	dld1	0.0011	0.0192941
FDXR	20	-1.27	dld1	0.015	-0.378306
FER1L6	20	0.35	dld1	0.022	0.013
FERMT2	20	0.21	dld1	0.0093	-0.2086
FES	20	0.1	dld1	0.0116	-0.0228205
FEV	20	0.16	dld1	0.0278	-0.13175
FGD2	18	-0.01	dld1	0.0049	-0.09745
FGD3	19	0.07	dld1	0.0172	-0.07
FGD4	20	0.25	dld1	-0.0127	0.076
FGD5	16	0.19	dld1	0.0418	-0.03895
FGD6	19	0.21	dld1	0.032	0.0239
FGF10	20	-0.01	dld1	-0.0102	-0.199897
FGF18	20	0.46	dld1	0.012	0.0241
FGFR1	20	0.26	dld1	0.0246	-0.0833793
FGFR3	20	0.19	dld1	-0.0222	-0.0505932
FGFR4	20	0.31	dld1	0.012	-0.150157
FGL2	20	0.09	dld1	0.0251	-0.52755
FKBP1A	18	-0.06	dld1	0.0438	0.0587
FKBP4	18	0.09	dld1	0.0441	-0.380795
FLI1	20	0.29	dld1	0.012	0.118973
FLNA	19	0.18	dld1		-0.0825385
FLOT2	20	-0.24	dld1	0.015	-0.1286
FLT3	19	0.19	dld1	0.0089	-0.222431
FMN2	20	0.41	dld1	0.0073	0.295737
FMR1	20	-0.05	dld1		0.220429
FN1	18	0.23	dld1	0.0278	-0.0998947
FNDC4	19	0.31	dld1	0.0969	-0.0585641
FNIP1	20	-0.15	dld1	0.0351	0.00782609
FOS	18	0.13	dld1	0.0093	-0.4458
FOSB	17	-0.3	dld1	0.0107	-0.0687368
FOSL1	20	0.58	dld1	0.012	-0.0734737
FOSL2	20	0.06	dld1	0.0969	-0.2082
FOXA1	20	-0.61	dld1	0.0093	-0.141
FOXA2	20	0.09	dld1	0.0183	-0.00713514
FOXA3	18	0.13	dld1	0.0107	-0.1387
FOXB1	19	0.07	dld1	0.0318	-0.350077
FOXC1	20	-0.12	dld1	-0.7609	-0.194556
FOXC2	20	-0.07	dld1	0.0202	0.270615
FOXD1	19	-0.12	dld1	0.0341	-0.0283684
FOXD2	20	-0.21	dld1	0.0319	-0.10315
FOXD3	20	0.34	dld1	0.0633	0.103263
FOXE1	20	0.27	dld1	0.0172	0.025
FOXE3	20	-0.15	dld1	0.0319	0.0748947
FOXF1	14	0.21	dld1	0.0202	-0.179647
FOXF2	20	-0.09	dld1	-0.7609	-0.0775294
FOXJ1	20	0.15	dld1	0.015	-0.0771667
FOXJ3	20	0.11	dld1	0.0319	-0.271421
FOXK1	19	-0.28	dld1	0.0109	-0.1512
FOXK2	20	0.18	dld1	0.015	-0.04815
FOXL1	14	-0.31	dld1	0.0202	-0.289118
FOXL2	19	-0.16	dld1	0.023	-0.0654
FOXM1	20	-0.18	dld1	0.0441	-0.092475
FOXN4	20	0.21	dld1	0.032	0.252053
FOXP1	19	0.3	dld1	-0.0174	-0.0598333
FOXP2	20	0.11	dld1	0.0105	-0.319105
FOXP3	16	0.57	dld1		0.04515
FOXP4	20	-0.01	dld1	0.0049	-0.1049
FOXQ1	19	-0.57	dld1	-0.7609	-0.209842
FPR1	20	0.43	dld1	0.0107	-0.110923
FREM2	16	0.09	dld1	0.0089	0.151605
FRS2	19	-0.17	dld1	0.032	0.0293
FST	18	0.26	dld1	0.0531	-0.167111
FTO	18	-0.11	dld1	-0.0238	0.039186
FTSJ2	20	-0.24	dld1	0.0109	-0.0478
FTSJ3	20	-3.13	dld1	0.015	-0.802105
FUBP1	20	-0.34	dld1	0.0007	-0.241381
FXR2	14	-0.01	dld1	0.015	-0.128
FXYD5	17	0.05	dld1	0.0107	-0.246676
FYCO1	20	0.29	dld1	0.0398	0.0515789
FZD1	18	-0.27	dld1	0.0251	-0.158158
FZD2	20	-0.11	dld1	0.015	0.0511143
FZR1	20	-0.14	dld1	0.026	-0.377
G3BP2	20	-0.11	dld1	0.0405	-0.151146
GAB2	20	-0.36	dld1	0.012	-0.0671795
GABARAP	22	0.03	dld1	0.015	0.0023
GABARAPL1	20	-0.19	dld1	0.0441	0.326579
GABARAPL2	26	-0.05	dld1	0.0202	0.108789
GABBR2	18	0.03	dld1	0.0172	-0.1723
GABPA	19	-0.84	dld1	-0.0787	-0.11615
GABRA1	19	0.3	dld1	-0.0509	0.11575
GABRP	18	0.55	dld1	0.012	-0.312103
GAK	20	-0.7	dld1	-0.0222	-0.204222
GATA1	18	0.26	dld1		-0.03725
GATA2	16	-0.06	dld1	0.023	0.000710526
GATA3	20	0	dld1	-0.0203	-0.0318421
GATA4	20	0.2	dld1	0.0246	0.0283684
GATA5	20	-0.04	dld1	0.0183	0.0709429
GATA6	18	-0.71	dld1	0.0071	-0.507026
GBAS	18	0.26	dld1		-0.1107
GBX1	20	0.26	dld1	0.0105	-0.216941
GBX2	20	0.3	dld1	0.0278	0.0467895
GCM1	18	0.05	dld1	0.0163	0.00984211
GDPD3	20	-0.23	dld1	-0.0238	-0.259375
GEMIN5	19	-1.96	dld1	-0.0509	0.135
GFI1	17	0.08	dld1	0.0007	-0.186833
GFRA1	20	0.28	dld1	0.0353	0.0793684
GGA1	20	0.04	dld1	0.0203	-0.373725
GGA3	20	-0.34	dld1	0.015	0.1379
GHRH	20	0.22	dld1	0.0183	0.07435
GIP	20	0.27	dld1	0.015	-0.11705
GJA3	18	-0.04	dld1	0.0089	0.0336486
GJA4	16	0.03	dld1	0.0319	-0.00262162
GJB2	20	-0.12	dld1	0.0089	-0.202703
GJB6	20	-0.04	dld1	0.0089	-0.283
GKN1	20	0.1	dld1	0.5281	-0.2577
GLI1	20	-0.3	dld1	0.032	-0.0133947
GLI2	20	0	dld1	0.037	-0.122026
GLI3	20	0.16	dld1	0.0171	-0.25745
GLIS3	20	0.34	dld1	0.0172	-0.11745
GLTSCR2	19	-1.52	dld1	0.0107	-0.418947
GMEB1	20	0.17	dld1	0.0319	-0.0204211
GMFG	20	-0.25	dld1	0.0107	-0.0815789
GMPR2	20	0.05	dld1	0.0093	-0.344789
GNAS	17	0.08	dld1	0.0183	-0.0239167
GNB1	20	0.02	dld1	-0.0145	0.3888
GNB2	18	-0.45	dld1	0.0251	0.129737
GNB2L1	20	-2.26	dld1	0.012	-0.87276
GNB3	20	-0.09	dld1	0.0441	-0.265211
GNB4	18	0.03	dld1	0.023	0.115105
GNB5	20	0.09	dld1	0.0318	0.015
GP2	20	0.18	dld1	-0.0238	-0.108925
GPC3	20	0.35	dld1		-0.142053
GPNMB	19	0.24	dld1	0.0171	-0.3163
GPR116	20	-0.04	dld1	0.0163	-0.14395
GPR132	20	0.15	dld1	0.0281	0.01865
GPR158	18	0.41	dld1	0.0261	-0.117744
GPR160	19	0.03	dld1	0.023	0.0392105
GPR20	19	-0.08	dld1	0.0277	-0.119368
GPR3	19	0.06	dld1	0.0319	-0.115187
GPR37	14	0.02	dld1	0.0105	-0.326
GPR64	20	0.21	dld1		-0.1472
GPRC5A	19	0.04	dld1	0.0441	0.115615
GPRC5B	18	0.3	dld1	-0.0238	0.0480513
GPX4	20	-1.16	dld1	0.026	-0.0385789
GREB1	19	-0.02	dld1	0.0868	-0.11535
GRHL1	20	0.05	dld1	0.0868	0.02785
GRIA2	20	0.32	dld1	0.0103	-0.227595
GRIK4	20	0.23	dld1	0.012	-0.143825
GRIN2C	15	0.01	dld1	0.015	-0.145649
GRIN3A	16	-0.08	dld1	0.0172	-0.157825
GRK4	18	-0.09	dld1	-0.0222	-0.342263
GRK5	18	0.08	dld1	0.0353	-0.1902
GRM3	19	0.08	dld1	0.0251	0.00525
GRWD1	20	-1.04	dld1	0.0107	0.0898889
GSC	16	0.29	dld1	-0.037	-0.22615
GSG2	20	-0.08	dld1	0.015	0.1442
GTF2A1	20	-1.01	dld1	-0.037	-0.214053
GTF2E1	16	-1.4	dld1	0.023	-0.2266
GTF2F1	20	-0.9	dld1	0.026	-0.24475
GTF2I	20	0.05	dld1	0.0251	-0.31255
GTF2IRD1	20	0.35	dld1	0.0251	-0.11305
GTF3A	20	-1.58	dld1	0.0089	-0.241
GTF3C1	20	-2.14	dld1	-0.0238	-0.0465
GTF3C2	20	-0.39	dld1	0.0969	-0.0690526
GTF3C4	20	-0.98	dld1	0.0388	0.0421579
GUCA1B	20	0.23	dld1	0.0049	-0.06135
H2AFX	20	-0.63	dld1	0.012	0.178029
H2AFY	20	0.31	dld1	0.0351	0.1329
HACE1	20	0.18	dld1	0.0163	-0.0939
HADHA	20	0.36	dld1	0.0969	-0.280568
HAND1	18	0.14	dld1	-0.0509	-0.0378947
HAND2	20	0.35	dld1	0.0103	-0.15155
HAPLN4	18	-0.2	dld1	0.026	0.0853158
HAS2	20	0.05	dld1	0.022	-0.2882
HAT1	18	-0.26	dld1	0.0345	-0.0149048
HBP1	20	-0.05	dld1	0.0251	-0.09325
HCFC1	20	-2.42	dld1		-0.4035
HCLS1	18	-0.07	dld1	0.023	-0.12
HDAC1	20	-0.21	dld1	0.0319	0.04585
HDAC10	20	0.1	dld1	0.0203	-0.119316
HDAC11	20	-0.18	dld1	0.0418	0.17655
HDAC2	20	0	dld1	0.0163	0.162706
HDAC3	20	-0.74	dld1	0.0351	0.133263
HDAC4	20	0.38	dld1	0.0278	-0.31355
HDAC5	20	-0.01	dld1	0.015	0.07
HDAC6	18	0.37	dld1		-0.03345
HDAC9	20	0.3	dld1	0.0171	-0.13655
HDGF	20	-0.36	dld1	0.0011	-0.0509
HDGFRP3	16	-0.01	dld1	0.0116	0.1286
HECTD1	20	-0.24	dld1	0.0093	0.067
HECTD2	18	-0.31	dld1	0.0233	0.0448947
HECTD3	19	-0.39	dld1	0.0319	0.135895
HECW1	20	0.05	dld1	0.0171	-0.06885
HECW2	18	-0.03	dld1	0.0439	-0.131947
HELLS	20	0.17	dld1	0.0233	0.1969
HELZ	20	-0.2	dld1	0.015	-0.0925128
HENMT1	20	-0.3	dld1	0.0011	0.06185
HEPACAM2	18	0.04	dld1	0.0251	-0.0935526
HERC1	20	0.1	dld1	0.0318	-0.050325
HERC2	20	0	dld1	-0.0336	-0.1049
HERC3	20	0.18	dld1	0.0405	-0.370368
HERC4	19	0.11	dld1	0.0233	-0.113
HERC5	19	-0.32	dld1	0.0405	-0.261737
HERC6	20	-0.08	dld1	0.0405	-0.2402
HES1	18	0.1	dld1	0.023	-0.07415
HES5	18	0.28	dld1	-0.0145	0.118556
HEY1	20	0.01	dld1	0.022	-0.0008
HEY2	19	0.25	dld1	0.048	-0.2655
HEYL	16	0.19	dld1	0.0319	-0.2766
HHAT	18	-0.01	dld1	0.0242	0.05925
HIC1	20	0.08	dld1	0.015	-0.243105
HIC2	20	-0.39	dld1	0.0203	-0.20825
HIF1A	20	0.15	dld1	0.0093	0.157795
HIF1AN	18	-0.31	dld1	0.0233	-0.0793077
HIF3A	18	0.12	dld1	0.0107	-0.0472895
HIPK1	20	-0.41	dld1	0.0011	-0.246325
HIPK2	20	0.25	dld1	0.0105	-0.0161
HIRA	20	-0.93	dld1	0.0203	-0.3774
HIST1H1A	20	-0.02	dld1	0.0049	0.1651
HIST1H1B	17	0	dld1	0.0049	0.258857
HIST1H1C	20	-0.13	dld1	0.0049	0.142125
HIST1H1D	19	-0.25	dld1	0.0049	0.240333
HIST1H1E	16	-0.21	dld1	0.0049	0.0162632
HIST1H1T	20	-0.06	dld1	0.0049	0.1022
HIST1H2BB	18	-0.47	dld1	0.0049	-0.063375
HIST3H2BB	17	-0.29	dld1	0.0073
HIST3H3	16	-0.28	dld1	0.0073	-0.0789444
HIVEP2	20	0.25	dld1	0.048	-0.0803
HK1	19	-0.05	dld1	0.0233	-0.07945
HLF	15	0.11	dld1	0.015	-0.12395
HMG20A	18	-0.04	dld1	0.0116	-0.523
HMG20B	20	0.03	dld1	0.026	-0.200421
HMGA2	20	0.02	dld1	0.032	0.0161
HMGB2	20	0.68	dld1	0.0103	0.0663333
HMGB4	20	0.26	dld1	0.0319	0.23865
HMGN1	18	-0.2	dld1	0.021	0.146526
HMGN3	19	0.06	dld1	0.0163	0.0891579
HMOX1	18	-0.07	dld1	0.0203	-0.14765
HMX2	20	0.79	dld1	0.0353	-0.111294
HNF4A	20	0.07	dld1	0.0183	-0.410842
HOXA1	18	-0.18	dld1	0.0171	-0.05675
HOXA10	20	-0.41	dld1	0.0171	-0.103563
HOXA11	20	-0.55	dld1	0.0171	-0.1532
HOXA13	20	-0.39	dld1	0.0171	-0.107
HOXA2	20	-0.41	dld1	0.0171	-0.3532
HOXA3	20	0	dld1	0.0171	-0.21265
HOXA4	20	-0.37	dld1	0.0171	0.160824
HOXA5	20	0.11	dld1	0.0171	-0.281611
HOXA7	18	0.26	dld1	0.0171	-0.096
HOXA9	20	-0.29	dld1	0.0171	0.133658
HOXB1	20	-0.19	dld1	0.015	0.01065
HOXB13	19	-0.29	dld1	0.015	-0.14165
HOXB2	18	-0.31	dld1	0.015	0.124368
HOXB3	20	-0.31	dld1	0.015	-0.465667
HOXB4	16	-0.27	dld1	0.015	0.0899474
HOXB5	20	-0.5	dld1	0.015	-0.3124
HOXB6	20	-0.39	dld1	0.015	-0.259211
HOXB7	18	-0.21	dld1	0.015	-0.206579
HOXB8	20	-0.17	dld1	0.015	-0.277
HOXB9	18	-0.24	dld1	0.015	-0.183412
HOXC10	20	-0.11	dld1	0.032	-0.23185
HOXC11	20	-0.04	dld1	0.032	0.0033
HOXC12	20	-0.5	dld1	0.032	-0.244158
HOXC13	20	0.04	dld1	0.032	-0.2718
HOXC4	20	0.11	dld1	0.032	0.0151579
HOXC5	18	-0.38	dld1	0.032	0.02075
HOXC6	18	-0.11	dld1	0.032	-0.270526
HOXC8	20	0.03	dld1	0.032	0.043
HOXC9	19	-0.14	dld1	0.032	-0.167316
HOXD1	20	-0.03	dld1	0.0345	-0.0502632
HOXD10	20	0.04	dld1	0.0345	-0.2862
HOXD11	20	-0.14	dld1	0.0345	0.0622222
HOXD12	19	0.28	dld1	0.0345	0.00715
HOXD13	20	-0.25	dld1	0.0345	-0.222737
HOXD3	20	0.15	dld1	0.0345	-0.263167
HOXD4	18	-0.08	dld1	0.0345	-0.12995
HOXD8	19	-0.33	dld1	0.0345	0.03775
HOXD9	20	-0.23	dld1	0.0345	-0.150778
HPD	20	-0.25	dld1	0.032	0.00102703
HR	19	0.28	dld1	0.0246	0.09315
HRAS	16	-0.3	dld1	0.5737	-0.140607
HRH3	20	0.07	dld1	0.0183	0.036775
HSD17B2	20	0.45	dld1	0.0202	-0.213275
HSF1	18	-0.89	dld1	0.0277	-0.6604
HSF2	17	-0.04	dld1	0.048	-0.35655
HSF4	20	-0.19	dld1	0.0202	-0.11885
HSPA8	19	-2.25	dld1	0.012	0.0172632
HSPBAP1	20	0.14	dld1	0.023	0.144333
HSPD1	17	-0.25	dld1	0.0439	-1.56347
HTR3A	20	0.13	dld1	0.012	-0.156308
HUWE1	19	-1.37	dld1		-0.3546
ICMT	17	0.13	dld1	-0.0145	0.19535
ID1	20	-0.38	dld1	0.0183	0.227444
ID2	18	-0.49	dld1	0.0868	0.0246842
IDH1	20	0.12	dld1	0.0439	-0.0889839
IDH2	18	0.03	dld1	0.0116	-0.142365
IDO2	17	0.02	dld1	0.0246	-0.212842
IFT122	18	-0.07	dld1	0.023	0.1726
IFT140	20	-0.03	dld1		0.101316
IFT172	18	0	dld1	0.0969	-0.191684
IFT80	20	0.16	dld1	0.023	0.2003
IGF1R	19	-0.31	dld1	0.0116	-0.114567
IGF2BP3	20	0.14	dld1	0.0171	-0.130737
IGSF1	20	0.43	dld1		-0.159308
IGSF9	18	0.2	dld1	0.0011	0.07175
IK	20	-1.65	dld1	0.0351	-0.57645
IKBKB	20	0.5	dld1	0.0246	-0.0698103
IKBKE	18	0.3	dld1	0.0242	-0.0248974
IKZF1	20	-0.02	dld1	0.0171	-0.0913158
IL6	20	0	dld1	0.0171	-0.15765
ILDR1	20	0.3	dld1	0.023	-0.428737
ILF2	20	-2.35	dld1	0.0011	-0.525105
IMPACT	22	-0.09	dld1	0.0071	-0.198947
INA	18	0.48	dld1	0.0233	-0.01735
INCENP	20	-2.14	dld1	0.012	-0.77525
ING1	20	0.25	dld1	0.3317	0.16195
ING2	20	0.59	dld1	0.0103	-0.0278947
ING4	18	0.16	dld1	0.0441	-0.02745
ING5	15	-0.25	dld1	0.0278	-0.112235
INO80B	19	-0.97	dld1	0.0029	-0.0842414
INO80C	17	-0.15	dld1	0.0071	0.0274118
INO80D	20	0.37	dld1	0.0439	0.21765
INO80E	18	0.04	dld1	-0.0238	0.011875
INSL4	23	0.17	dld1	0.0172	-0.105474
INTS12	18	-0.5	dld1	0.0405	0.173632
INTS4	16	-1.59	dld1	0.012	-0.3367
IRAK4	20	0.16	dld1	0.032	-0.0915135
IRF1	20	0.27	dld1	0.0351	-0.238765
IRF2	18	0.16	dld1	0.0103	-0.0290526
IRF4	20	0.07	dld1	-0.7609	0.250795
IRF5	18	0.5	dld1	0.0105	0.134316
IRF6	16	-0.01	dld1	0.0242	-0.0119
IRF7	20	0.04	dld1	0.5737	0.261684
IRF8	19	0.4	dld1	0.0202	-0.30515
IRX1	20	0.33	dld1	-0.1138	-0.115722
IRX2	20	-0.05	dld1	-0.1138	0.0460606
IRX3	16	-0.27	dld1	-0.0238	-0.0965789
IRX4	20	0.31	dld1	-0.1138	-0.0735294
IRX5	20	-0.02	dld1	-0.0238	-0.145684
IRX6	18	-0.06	dld1	-0.0238	-0.0672105
ISG20	20	0.35	dld1	0.0116	-0.35845
ISL1	20	0.05	dld1	0.0531	-0.40565
ISL2	19	-0.26	dld1	0.0318	-0.328158
ITCH	20	0	dld1	0.0183	-0.018
ITGB6	19	-0.06	dld1	0.0345	-0.01735
ITK	20	0.42	dld1	-0.0509	-0.161033
ITLN1	20	0.11	dld1	0.0011	-0.303757
ITPKC	16	0	dld1	0.0107	-0.171789
ITSN1	18	0.53	dld1	0.021	-0.186
JAG1	18	-0.02	dld1	0.0438	-0.239825
JAK2	19	0.38	dld1	0.0172	0.049
JARID2	20	0.35	dld1	0.0049	-0.23005
JMJD1C	20	-0.26	dld1	0.0233	0.137132
JMJD4	19	0.01	dld1	0.0073	0.11005
JMJD7	18	-0.13	dld1	0.0471	-0.108615
JMJD8	19	-0.37	dld1		-0.0082
JPH2	19	0.09	dld1	0.0183	-0.164718
JUN	20	0.1	dld1	0.0319	-0.0317895
JUNB	18	0.28	dld1	0.026	0.104
JUND	20	0	dld1	0.026	-0.255421
KALRN	19	0.28	dld1	0.023	-0.210857
KATNB1	20	-0.71	dld1	-0.0238	-0.264737
KBTBD6	16	0.57	dld1	0.0089	0.146464
KCNB2	19	0.07	dld1	-0.0329	-0.0870526
KCNG4	20	0.21	dld1	0.0202	-0.25241
KCNIP3	20	0.21	dld1	0.0029	-0.1429
KCNN1	18	0.02	dld1	0.026	-0.424676
KCNV2	16	0.23	dld1	0.0172	0.076
KCTD1	18	0.34	dld1	0.0071	-0.073225
KCTD3	20	0.08	dld1	0.0242	0.21655
KDM4D	20	-0.05	dld1	0.012	0.134833
KDM6B	20	-0.08	dld1	0.015	-0.2981
KEAP1	20	0.16	dld1	0.026	-0.232
KIAA0226	18	0.39	dld1	0.023	-0.3047
KIAA1377	20	0.2	dld1	0.012	-0.262056
KIAA1804	18	0.37	dld1	0.0073	0.44
KIAA2026	20	-0.14	dld1	0.0172	0.181316
KIF11	20	-2.31	dld1	0.0233	-1.16203
KIF18A	18	-0.5	dld1	0.012	-0.177684
KIF21A	18	0.11	dld1	-0.0127	0.192895
KIF21B	19	0.1	dld1	0.0242	-0.0561053
KIF6	19	0.15	dld1	0.0049	-0.179925
KLB	20	0.02	dld1	-0.0222	0.180105
KLF1	20	-0.28	dld1	0.026	-0.267053
KLF10	20	-0.29	dld1	0.022	-0.05355
KLF11	20	-0.14	dld1	0.0868	-0.14235
KLF12	19	0.11	dld1	0.0089	-0.2829
KLF13	18	-0.06	dld1	0.0455	0.0454
KLF15	20	0.06	dld1	0.023	-0.284211
KLF16	20	-1.01	dld1	0.026	-0.230949
KLF2	20	-0.2	dld1	0.026	-0.151632
KLF3	20	-0.04	dld1	-0.0222	-0.138722
KLF4	16	-0.45	dld1	0.0172	-0.07025
KLF5	18	-0.5	dld1	0.0089	0.029
KLF6	20	0.33	dld1	-0.0203	0.04245
KLF8	20	0.27	dld1		0.0125263
KLF9	20	-0.19	dld1	0.0172	-0.067619
KLHL38	19	-0.06	dld1	0.022	-0.036725
KLK1	18	0.11	dld1	0.0107	-0.3596
KLRG2	18	-0.1	dld1	0.0105	-0.389162
KNDC1	18	0.33	dld1	-0.0416	-0.0442778
KRT18	21	-0.23	dld1	0.032	-0.0621053
KSR1	20	0.26	dld1	0.015	-0.0355385
L1CAM	19	0.2	dld1		0.176675
L3MBTL2	20	0.14	dld1	0.0203	0.06545
L3MBTL3	20	-0.14	dld1	0.048	0.308526
L3MBTL4	18	0.44	dld1	-0.1342	0.10715
LAIR1	20	0.21	dld1	0.0107	-0.374184
LAMA5	17	0.05	dld1	0.0183	-0.0270256
LAMP1	20	0.05	dld1	0.0518	-0.392368
LAMP2	20	-0.15	dld1		-0.343762
LAMP5	20	0.28	dld1	0.0438	-0.145487
LBR	20	0.29	dld1	0.0073	0.1728
LBX1	20	-0.03	dld1	0.0233	-0.08165
LCK	18	-0.06	dld1	0.0319	-0.0936579
LCN2	20	-0.01	dld1	0.0388	-0.1073
LCN9	17	0.04	dld1	0.0388	-0.306278
LDLRAD3	18	0.12	dld1	0.012	-0.268425
LEF1	20	0.45	dld1	0.0405	-0.1582
LEFTY1	20	0.22	dld1	0.0073	0.153077
LEP	18	-0.13	dld1	0.0105	-0.24165
LEPRE1	20	-0.08	dld1	0.0319	-0.178471
LEPREL1	20	-0.07	dld1	0.023	0.15985
LEPREL2	16	-0.31	dld1	0.0441	-0.0787368
LETM2	20	0.27	dld1	0.0246	0.002025
LGR5	19	-0.13	dld1	0.032	0.032925
LGR6	19	-0.08	dld1	0.0242	-0.294949
LHX1	20	-0.17	dld1	0.015	-0.271579
LHX2	20	0.05	dld1	0.0388	-0.593579
LHX3	20	-0.02	dld1	0.0388	-0.28925
LHX4	17	0.34	dld1	0.0011	-0.13895
LHX5	20	0.08	dld1	0.032	-0.3459
LHX6	20	0	dld1	0.0388	-0.0498889
LHX8	18	0.07	dld1	0.0007	-0.3316
LHX9	20	0.31	dld1	0.0011	-0.2228
LIN7C	26	-0.3	dld1	0.012	0.0133056
LIPH	20	0.16	dld1	0.023	-0.311744
LLGL1	20	-0.04	dld1	0.015	-0.1211
LLGL2	20	0.24	dld1	0.015	-0.115412
LMO1	18	0.52	dld1	0.5737	0.0774737
LMO4	20	-0.31	dld1	0.0007	-0.218105
LMO7	20	0.15	dld1	0.0089	-0.1535
LMX1A	18	0.06	dld1	0.0011	-0.203
LMX1B	20	0.2	dld1	0.0388	-0.346474
LOX	20	0.06	dld1	0.0351	0.08815
LPHN3	20	0.28	dld1	0.0094	-0.081325
LRBA	18	0.14	dld1	0.0103	-0.061
LRFN2	20	0.39	dld1	0.0049	-0.114649
LRP11	18	0.18	dld1	0.048	-0.0852105
LRP2	20	-0.02	dld1	0.0345	-0.215897
LRP5L	18	-0.02	dld1	0.0203	-0.029
LRPPRC	20	-1.5	dld1	0.6035	-0.356842
LRRC15	19	0.25	dld1	0.023	-0.167667
LRRC31	18	0.38	dld1	0.023	-0.0512895
LRRC4	20	0.01	dld1	0.0105	-0.203564
LRRK2	20	0.21	dld1	-0.0127	0.196053
LRRN3	18	0.15	dld1	0.0105	-0.0290513
LRRN4CL	20	-0.1	dld1	0.012	0.206447
LRWD1	17	-0.3	dld1	0.0251	0.04035
LTBP4	18	-0.57	dld1	0.0107	0.2094
LY6D	22	0.16	dld1	0.0277	-0.165538
LYN	20	0.15	dld1	-0.0329	-0.090475
LYPD1	20	0.17	dld1	-0.0289	-0.0806
LYPD3	20	-0.01	dld1	0.0107	-0.0476471
LYPD6B	19	-0.01	dld1	0.0345	0.0797692
LYPD8	13	0.36	dld1	0.0073	-0.0881795
LYST	20	0.32	dld1	0.0073	0.26865
MADD	20	0.09	dld1	0.012	0.0075
MAF	19	0.28	dld1	0.0202	-0.2115
MAFA	18	-0.18	dld1	0.0277	-0.2301
MAFB	16	0.34	dld1	0.0183	-0.280105
MAFF	18	0.29	dld1	0.0203	-0.225294
MAFG	20	-0.36	dld1	0.015	-0.07285
MAFK	18	-0.13	dld1	0.0109	-0.132722
MAGEC3	18	0.41	dld1		-0.0281333
MAMDC2	20	0.14	dld1	0.0172	-0.29585
MAP1B	18	0.13	dld1	0.0341	-0.02605
MAP1LC3A	18	-0.1	dld1	0.0183	-0.295051
MAP1LC3B	18	-0.52	dld1	0.0202
MAP1LC3C	18	0.16	dld1	0.0073	-0.152357
MAP2K1	20	-0.23	dld1	0.0318	-0.130167
MAP3K3	17	0.24	dld1	0.015	-0.2398
MAP3K7	17	-0.03	dld1	0.0163	0.33055
MAP3K8	20	0.25	dld1	0.0261	-0.285139
MAP3K9	20	-0.08	dld1	0.0093	0.184211
MAP4K5	20	-0.18	dld1	0.0093	0.1716
MAPK1	20	-0.57	dld1	0.0203	-0.107717
MAPK12	20	-0.03	dld1	0.0203	-0.469342
MAPKAPK3	18	0.04	dld1	0.0398	0.0196053
MAPKBP1	20	-0.22	dld1	0.0471	0.06735
MARK1	20	0.32	dld1	0.0073	0.208944
MARK2	18	0.19	dld1	0.012	-0.0893158
MARK3	20	0.61	dld1	0.0281	-0.148333
MARK4	17	0.34	dld1	0.0107	-0.0967368
MASP1	20	0.42	dld1	0.023	-0.20005
MAST1	20	-0.44	dld1	0.026	-0.395525
MAST2	20	-0.08	dld1	0.0319	-0.351158
MAVS	18	0.07	dld1	0.0438	0.0898824
MAX	20	-1.48	dld1	0.0093	-0.1737
MAZ	18	-0.19	dld1	-0.0238	-0.269211
MBD1	18	0.2	dld1	-0.0135	0.15775
MBD2	16	-0.36	dld1	-0.0135	-0.361952
MBD3	20	-0.24	dld1	0.026	0.29165
MBD3L1	20	0.33	dld1	0.026	0.00035
MBD4	20	-0.06	dld1	0.023	0.10895
MBD5	20	0.17	dld1	0.0345	0.00394444
MBD6	15	-0.03	dld1	0.032	0.15335
MBTD1	18	-0.24	dld1	0.015	-0.03975
MBTPS1	20	-1.24	dld1	0.0202	-0.527564
MCF2	18	0.34	dld1		0.114421
MCF2L	20	0.23	dld1	0.0518	0.346118
MCF2L2	20	0.15	dld1	0.023	-0.0841053
MCL1	20	-0.11	dld1	0.0011	-0.000384615
MCM2	20	-0.47	dld1	0.023	0.0184
MCRS1	20	-0.67	dld1	0.032	-0.212147
MDM2	20	-0.09	dld1	0.032	-0.0361053
MDM4	18	0.14	dld1	0.0242	-0.0777679
MED1	20	-0.74	dld1	0.015	-0.5564
MED12	20	-1.62	dld1		-1.37042
MED12L	20	0.16	dld1	0.023	0.0336
MED8	20	-1.83	dld1	0.0319	-0.1963
MEF2A	20	0.36	dld1	0.0116	0.0988
MEF2B	18	-0.19	dld1	0.026
MEF2C	20	0.21	dld1	0.0341	-0.29165
MEF2D	20	0.08	dld1	0.0011	0.0379474
MEIS1	20	-0.17	dld1	0.5281	-0.15935
MEIS2	19	-0.01	dld1	0.0455	-0.21955
MELK	19	0.18	dld1	0.0172	0.0681579
MEN1	19	-1.99	dld1	0.012	-0.446971
MEOX2	20	0.04	dld1	0.0109	-0.1278
MEPCE	20	-2.27	dld1	0.0251	0.13675
MESP2	16	0.11	dld1	0.0116	-0.0413333
MET	20	0.25	dld1	0.0105	0.0879231
METTL1	20	-1.61	dld1	0.032	-0.00685
METTL2A	12	-0.51	dld1	0.015
METTL3	20	-1.48	dld1	0.0093	0.30095
MFGE8	20	0.1	dld1	0.0116	-0.175775
MFSD2A	18	0.05	dld1	0.0319	0.214579
MFSD3	20	-0.41	dld1	0.0277	-0.211923
MFSD4	17	0.16	dld1	0.0242	0.018
MGA	20	0.09	dld1	0.0471	-0.05825
MINA	18	0.2	dld1	-0.0174	0.0973333
MITF	20	0.12	dld1	0.0649	-0.0217358
MIXL1	20	0.2	dld1	0.0073	-0.0944
MKNK1	20	0	dld1	0.0319	-0.238333
MLF2	20	0.06	dld1	0.0441	-0.28005
MLLT3	20	-0.56	dld1	0.0172	-0.3717
MLLT6	20	-0.56	dld1	0.015	0.0981053
MLX	17	-0.66	dld1	0.015	-0.09055
MLXIPL	19	-0.4	dld1	0.0251	-0.217368
MME	20	0.01	dld1	0.023	-0.0833077
MMP10	20	0.32	dld1	0.012
MMP20	18	0.33	dld1	0.012	0.0973158
MMP27	19	0.2	dld1	0.012	-0.220158
MMP7	20	0.08	dld1	0.012	-0.0403077
MMP9	16	-0.11	dld1	0.0183	0.18575
MNT	20	0.3	dld1	0.015	-0.391
MORF4L1	17	-0.67	dld1	0.0116	-0.0904211
MPP5	20	0.37	dld1	0.0093	0.269865
MREG	22	-0.15	dld1	0.0278	-0.112515
MRPL38	20	-2.47	dld1	0.015	-0.650529
MSC	20	0.5	dld1	-0.0329	-0.0550526
MSH6	19	-0.46	dld1	0.5281	0.136205
MST1	19	-0.23	dld1	0.0398	-0.136053
MST1R	20	0.07	dld1	0.0398	0.0863846
MSX1	18	0.43	dld1	-0.0222	-0.146158
MSX2	18	0.14	dld1	0.012	-0.0674
MTA1	16	0.08	dld1	0.0281	0.16145
MTA2	19	-0.57	dld1	0.012	0.0274
MTAP	20	0.06	dld1	0.0172	-0.114316
MTF2	20	-0.17	dld1	0.1099	-0.0636
MTHFD1	18	-1.6	dld1	0.0093	-0.38695
MTHFD1L	20	-0.52	dld1	0.0054	0.00765
MTHFD2	15	-0.39	dld1	0.0029	-0.182316
MTM1	20	0.1	dld1		-0.0363684
MUM1	20	0.05	dld1	0.026	0.0243158
MXD1	18	0.01	dld1	0.5281	0.08355
MXI1	18	0.25	dld1	0.0353	0.134895
MXRA8	20	-0.1	dld1	-0.0145	-0.0964
MYB	19	0.3	dld1	0.048	-0.146
MYBL1	20	0.13	dld1	-0.0329	-0.0486
MYBL2	20	-1.94	dld1	0.0183	-0.733237
MYCN	20	0.1	dld1	-0.0105	0.118788
MYD88	18	0	dld1	0.0398	0.0141081
MYEF2	18	0.23	dld1	-0.0713	-0.56895
MYF5	20	0.17	dld1	0.032	-0.427
MYL3	19	0.33	dld1	0.0398	-0.0443
MYNN	20	0	dld1	0.023	-0.128306
MYOCD	18	0.39	dld1	0.015	-0.2106
MYOD1	18	-0.01	dld1	0.012	-0.2548
MYOG	18	0.18	dld1	0.0242	-0.238053
MYOZ3	20	0.37	dld1	0.0351	0.075
MYSM1	19	0.33	dld1	0.0319	0.2027
MYT1	20	0.28	dld1	0.0183	-0.170526
MYT1L	17	0.5	dld1	-0.0393	-0.0369474
NAB1	18	-0.04	dld1	0.0439	-0.183263
NAB2	20	-0.32	dld1	0.032	-0.0210556
NAPG	19	0.04	dld1	0.0071	-0.1327
NARS2	20	-1.36	dld1	0.012	-0.308842
NBEA	18	0.03	dld1	0.0089	-0.07325
NBEAL1	20	0.3	dld1	0.0439	-0.291421
NBEAL2	20	0.21	dld1	0.0398	-0.00252941
NBR1	20	0.12	dld1	0.015	-0.15195
NCKAP1L	20	-0.2	dld1	0.032	-0.381579
NCOA1	20	0.28	dld1	-0.0105	-0.1838
NCOA2	20	-0.07	dld1	-0.0329	-0.00765
NCOA3	18	-0.18	dld1	0.0183	-0.221105
NCOA4	18	-0.6	dld1	-0.0529	-0.22
NCOA5	20	0.19	dld1	0.0183	0.0291579
NCOA6	19	0.26	dld1	0.0183	-0.283111
NCOA7	18	0.15	dld1	0.048	0.042
NCOR1	20	0.37	dld1	0.015	0.30885
NCOR2	19	0.28	dld1	0.032	-0.07865
NCR3	20	0.22	dld1	0.0049	-0.0669231
NDFIP2	15	-0.09	dld1	0.0089	-0.06625
NDRG1	20	0.39	dld1	0.022	-0.216474
NDUFA2	20	-0.55	dld1	0.0351	0.0804
NEDD1	20	-0.98	dld1	0.032	-0.436667
NEDD4	20	-0.2	dld1	0.0318	0.205842
NEDD4L	20	0.34	dld1	-0.0135	-0.00405
NEGR1	20	0.21	dld1	0.0007	0.020575
NEK4	16	-0.2	dld1	0.0398	-0.210027
NEK6	20	0.14	dld1	0.0388	-0.02575
NEK7	20	0.17	dld1	0.0011	-0.0895517
NEK9	20	-0.03	dld1	0.0093	-0.221725
NEUROD1	20	0.27	dld1	0.0439	-0.1114
NEUROD2	19	-0.11	dld1	0.015	-0.062
NEUROG1	19	0.1	dld1	0.0351	-0.28035
NFAT5	20	0.03	dld1	0.0202	0.04155
NFATC1	17	-0.05	dld1	-0.0135	-0.136556
NFATC2	20	0.5	dld1	0.0183	-0.28955
NFATC3	19	-0.03	dld1	0.0202	-0.235947
NFATC4	20	0.1	dld1	0.0093	-0.06905
NFE2	18	0.09	dld1	0.032	0.067
NFE2L1	20	0.11	dld1	0.015	-0.02385
NFE2L2	20	-0.06	dld1	0.0174	-0.0538214
NFIA	18	0.05	dld1	0.0633	-0.10565
NFIB	20	0.16	dld1	0.0172	0.25015
NFIC	20	0.07	dld1	0.026	0.0618889
NFIL3	18	0.27	dld1	0.0172	-0.140889
NFIX	20	0.06	dld1	0.026	-0.274444
NFKB1	20	0.05	dld1	0.0405	-0.0372353
NFKB2	20	-0.17	dld1	0.0233	0.0105294
NFRKB	20	0.12	dld1	0.012	0.0988649
NFX1	20	-0.15	dld1	0.0172	0.0101
NFYA	20	0.09	dld1	0.0049	-0.112947
NFYB	17	-0.95	dld1	0.032	-0.22825
NGFR	15	-0.04	dld1	0.015	-0.304308
NHLH1	20	0.19	dld1	0.0011	0.342579
NHLH2	20	-0.18	dld1	0.0011	0.00289474
NIPSNAP1	19	0.06	dld1	0.0203	-0.0835
NKIRAS1	13	0.45	dld1	0.0031	-0.275925
NLGN3	20	-0.23	dld1		-0.18795
NLGN4X	18	0.4	dld1		-0.347458
NME1	26	-0.11	dld1	0.015	-0.0428571
NME2	17	-0.07	dld1	0.015
NME5	24	0.01	dld1	0.0351	0.0356842
NNMT	20	0.4	dld1	0.012	-0.43885
NOG	18	0.26	dld1	0.015	-0.0818
NOTCH1	16	0.02	dld1	0.0388	0.01395
NPAS1	19	0.02	dld1	0.0107	-0.0109
NPAS2	20	0.21	dld1	0.0029	-0.25935
NPAS4	18	-0.1	dld1	0.012	0.05215
NPAT	20	-1.88	dld1	0.012	-0.14025
NPC1	16	-0.12	dld1	0.0071	-0.0469231
NPEPL1	20	0.38	dld1	0.0183	-0.5189
NPR3	20	-0.01	dld1	-0.0102	0.0959487
NPY1R	20	0.1	dld1	0.0103	-0.163275
NR0B1	20	0.14	dld1		-0.00015
NR0B2	19	0.03	dld1	0.0319	0.0736
NR1D1	19	-0.05	dld1	0.015	-0.213579
NR1D2	18	0.04	dld1	0.0031	0.26975
NR1H2	20	0.24	dld1	0.0107	-0.06915
NR1H3	18	-0.46	dld1	0.012	-0.01455
NR1H4	18	-0.02	dld1	0.032	-0.03145
NR1I2	18	0.16	dld1	-0.0887	0.04245
NR1I3	18	-0.05	dld1	0.0011	-0.2872
NR2C1	20	0.28	dld1	0.032	0.0154737
NR2C2	20	0.13	dld1	0.0418	-0.1416
NR2E1	19	0.1	dld1	0.0163	0.05795
NR2F1	18	0.05	dld1	0.0341	0.105421
NR2F2	20	-0.25	dld1	0.0116	-0.3768
NR2F6	19	-0.23	dld1	0.026	-0.1139
NR3C1	18	-0.02	dld1	0.0351	-0.0797
NR3C2	20	0.19	dld1	0.0103	-0.220632
NR4A1	18	0.14	dld1	0.032	-0.07565
NR4A2	18	0.02	dld1	0.0345	0.0292632
NR4A3	20	-0.01	dld1	0.0172	0.0463
NR5A1	20	-0.14	dld1	0.0388	0.0497895
NR5A2	20	-0.11	dld1	0.0242	-0.10225
NR6A1	20	-0.18	dld1	0.0388	-0.1841
NRAS	20	0.32	dld1	0.0011	-0.0533736
NRBP1	20	-1.34	dld1	0.0969	-0.2618
NRCAM	19	-0.04	dld1	0.0251	-0.137103
NRF1	19	-1.15	dld1	0.0105	-0.334947
NRG2	20	-0.23	dld1	0.0351	-0.2179
NRIP1	20	0.39	dld1	0.0254	-0.08985
NRL	18	-0.04	dld1	0.0093	-0.0134
NRN1	19	0.41	dld1	-0.7609	0.0219167
NRP1	18	0.06	dld1	0.0261	-0.0646842
NRXN2	20	-0.36	dld1	0.012	0.0192632
NSD1	19	0.33	dld1	0.012	-0.163128
NSDHL	20	0.17	dld1		-0.123432
NSMAF	20	-0.03	dld1	-0.0329	-0.122406
NSUN2	20	-0.32	dld1	-0.0102	-0.271526
NTM	20	0.39	dld1	-0.0607	0.237368
NTRK3	20	0.24	dld1	0.0116	-0.35725
NUAK1	20	-0.08	dld1	0.032	-0.0891842
NUP37	20	-0.07	dld1	0.032	-0.0437
NUTF2	18	-1.56	dld1	0.0202	-1.50575
NXPH3	20	0.21	dld1	0.015	-0.0686486
OBSCN	19	0.11	dld1	0.0073	0.15444
OGT	17	-1.46	dld1		-0.024225
OLFM2	20	-0.23	dld1	0.026	-0.0331
OLFML2B	17	-0.14	dld1	0.0011	-0.33425
OLIG1	18	0.24	dld1	0.021	-0.1234
OLIG2	20	0.57	dld1	0.021	0.0495278
OLR1	20	0.29	dld1	0.0441	-0.157775
ONECUT1	20	-0.01	dld1	0.0318	-0.13385
ONECUT2	20	0.22	dld1	-0.0135	-0.31895
OTX1	20	0.15	dld1	0.5281	-0.131
OTX2	19	0.17	dld1	0.0093	0.08975
OVOL1	19	-0.31	dld1	0.012	-0.4021
P2RY6	20	-0.28	dld1	0.012	0.0855
P4HA1	20	0.02	dld1	0.0233	0.0373333
P4HA2	20	0.26	dld1	0.0351	0.0101579
P4HA3	20	0	dld1	0.012
PA2G4	22	-0.71	dld1	0.032	-0.085
PAFAH1B1	20	-1.92	dld1	0.015	0.179105
PAK1IP1	18	-2.31	dld1	0.0049	-0.33595
PAK6	18	-0.07	dld1	0.0455	0.074075
PAPPA	18	0.02	dld1	-0.0036	-0.274225
PAQR8	18	-0.25	dld1	0.0163	0.0718974
PAQR9	20	-0.04	dld1	0.023	-0.169263
PARK2	20	0.21	dld1	-0.0706	-0.155282
PARP1	18	0.06	dld1	0.0073	0.186972
PARP11	17	0.21	dld1	0.0441	0.23455
PARP12	20	0.01	dld1	0.0105	-0.0662
PARP15	20	0.2	dld1	0.023	-0.2589
PARP16	16	-0.07	dld1	0.0318	-0.0778889
PARP2	19	-0.04	dld1	0.0093	0.105094
PARP3	20	-0.23	dld1	0.0398	0.00222222
PARP4	16	-0.05	dld1	0.0089	-0.0949091
PARP8	18	0.47	dld1	-0.0102	0.086697
PARP9	20	0.08	dld1	0.023	0.204579
PART1	19	0.09	dld1	0.0341
PAX1	20	-0.05	dld1	0.0183	0.0225
PAX2	20	0.29	dld1	0.0233	-0.126
PAX3	18	0.28	dld1	0.0278	-0.03865
PAX4	18	-0.04	dld1	0.0105	-0.326167
PAX5	20	0.22	dld1	0.0172	0.1485
PAX6	20	-0.11	dld1	0.012	-0.138737
PAX7	20	0.2	dld1	0.0319	-0.12765
PAX8	20	-0.04	dld1	0.0861	-0.119842
PAX9	20	0.11	dld1	0.0093	-0.156765
PBK	20	0.24	dld1	0.0246	0.0544
PBX1	20	0.09	dld1	0.0011	-0.235429
PBX2	14	0.01	dld1	0.0049	-0.265526
PBX3	20	0.02	dld1	0.0388	-0.05235
PCDH7	20	0.21	dld1	-0.0222	0.0158947
PCDH9	20	0.27	dld1	0.0089	-0.179718
PCGF1	16	-0.6	dld1	0.0029	-0.0491
PCGF2	16	-0.19	dld1	0.015	0.039
PCGF5	18	0	dld1	0.0233	-0.007
PCGF6	24	-0.02	dld1	0.0233	0.2591
PCNA	20	-3.05	dld1	0.0438	-0.7765
PDE1C	20	0.29	dld1	0.0171	-0.398811
PDE2A	18	0.24	dld1	0.012	-0.24725
PDE4C	18	-0.26	dld1	0.026	-0.151206
PDE6D	22	0.24	dld1	0.0278	-0.165641
PDPN	18	0.33	dld1	0.0319	-0.172895
PDZK1IP1	16	0.17	dld1	0.0319	-0.083
PELP1	20	-1.3	dld1	0.015	-0.0882222
PER1	20	0.12	dld1	0.015	-0.05535
PEX14	20	-0.12	dld1	0.0319	-0.399333
PFDN4	13	0.28	dld1	0.0183	-0.161833
PFDN5	20	-0.5	dld1	0.032	-0.0593
PFKFB4	18	0.2	dld1	0.0398	-0.0959474
PGBD5	20	0.41	dld1	0.0073	0.00161538
PGM5	20	0.16	dld1	0.0172	-0.14285
PGR	20	0.17	dld1	0.012	-0.1879
PHACTR1	20	0.18	dld1	0.0049	-0.1799
PHB	19	-2.33	dld1	0.015
PHC1	20	0.17	dld1	0.0441	0.0382955
PHC2	20	-0.23	dld1	0.0319	-0.0254
PHC3	19	0.36	dld1	0.023	-0.0749444
PHF1	18	-0.21	dld1	0.0049	0.0025
PHF10	20	0.19	dld1	0.0194	-0.0860645
PHF11	20	0.11	dld1	0.0089	0.0820556
PHF12	20	-0.88	dld1	0.015	-0.0988611
PHF13	19	-0.2	dld1	-0.0145	-0.1093
PHF14	18	0.26	dld1	0.0109	0.1239
PHF2	18	-0.42	dld1	0.0172	0.232658
PHF20	18	0.12	dld1	0.0183	-0.0314
PHF20L1	18	-0.1	dld1	0.022	0.0409474
PHF21A	20	0.15	dld1	0.012	0.19565
PHF21B	20	0.08	dld1	0.0203	0.0103
PHF23	20	-0.03	dld1	0.015	0.0437368
PHF3	20	0.15	dld1	0.0163	-0.0793
PHF6	19	0.19	dld1		0.31775
PHF7	14	0.1	dld1	0.0398	-0.03495
PHF8	20	0	dld1		-0.01485
PHIP	18	0.28	dld1	0.0163	-0.109031
PHOX2A	18	-0.1	dld1	0.012	-0.181421
PHOX2B	20	0.19	dld1	-0.0222	-0.1057
PHTF1	18	0.02	dld1	0.0011	-0.287947
PIK3C2A	20	0.01	dld1	0.012	-0.085875
PIK3C2B	15	0.01	dld1	0.0242	0.12825
PIK3C3	19	-1.1	dld1	0.0124	-0.107308
PIK3CA	20	-1.37	dld1	0.023	-0.923556
PIK3R4	17	-1.5	dld1	0.023	-0.407167
PIM1	20	-0.4	dld1	0.0049	-0.0835091
PINK1	16	0.23	dld1	0.0319	-0.417795
PIP5K1A	19	-0.1	dld1	0.0011	-0.236452
PITPNM2	20	-0.12	dld1	0.032	-0.3198
PITX1	20	0.13	dld1	0.0351	-0.0044
PITX2	20	0	dld1	0.0103	-0.0533
PKD1L2	18	0.28	dld1	0.0202	-0.615842
PKHD1L1	18	0.05	dld1	0.022	0.0024359
PKLR	20	0.09	dld1	0.0011	-0.17141
PKNOX2	20	0.05	dld1	0.012	-0.422421
PLA2G4B	20	-0.23	dld1	0.0471
PLAA	18	0.07	dld1	0.0172	0.0968889
PLAC9	24	-0.02	dld1	0.0233	-0.14895
PLAGL2	20	-0.01	dld1	0.0183	-0.0240769
PLAT	20	0.28	dld1	0.0246	-0.218684
PLCG1	15	0.02	dld1	0.0183	-0.230684
PLD1	20	0.15	dld1	0.023	-0.0662381
PLEKHG1	20	0.54	dld1	0.0054	-0.1311
PLEKHG2	20	-0.25	dld1	0.0107	0.0611053
PLEKHG4B	20	0.23	dld1	0.0486	0.0744
PLEKHG5	20	0.15	dld1	-0.0145	0.28845
PLEKHG6	20	0.15	dld1	0.0441	-0.442842
PLEKHG7	18	-0.11	dld1	0.032	0.13565
PLOD1	20	0.17	dld1	0.0319	-0.141947
PLOD2	20	0.05	dld1	0.023	0.0986842
PLOD3	20	-0.23	dld1	0.0251	-0.0177
PLRG1	20	-1.27	dld1	0.0103	-0.18905
PML	18	-0.1	dld1	0.0318	-0.0156
PMVK	18	-2.12	dld1	0.0011	-0.208744
PNN	20	-0.85	dld1	0.0093	-0.3497
PNPT1	19	-1.56	dld1	0.5281	-0.641105
POLB	20	0.47	dld1	0.0246	0.143513
POLR2A	20	-2.37	dld1	0.015	-0.4691
POP7	19	-1.16	dld1	0.0251	-0.209316
POU1F1	18	-0.01	dld1	-0.0174	-0.18905
POU2AF1	20	0.27	dld1	0.012	0.0508421
POU2F1	20	-0.22	dld1	0.0011	0.00409524
POU2F2	20	0.18	dld1	0.0107	-0.219286
POU2F3	18	0.5	dld1	0.012	0.0572353
POU3F1	20	-0.04	dld1	0.0319	0.198647
POU3F2	20	0.13	dld1	0.0163	-0.460722
POU3F3	18	-0.1	dld1	0.0861
POU3F4	16	0.18	dld1		-0.202158
POU4F1	18	0.28	dld1	0.0089	-0.0111667
POU4F2	20	0.21	dld1	0.0103	-0.12095
POU4F3	18	0.12	dld1	0.0351	-0.370158
POU5F1	17	0	dld1	0.0049
PPAPDC1B	20	0.03	dld1	0.0246	0.118225
PPARA	20	0.35	dld1	0.0203	-0.412333
PPARD	18	-0.18	dld1	0.0049	-0.1224
PPARG	19	0.48	dld1	0.0418	-0.2926
PPARGC1A	20	0.32	dld1	-0.0222	-0.22975
PPFIA4	20	0.14	dld1	0.0242	-0.0497895
PPM1D	17	-0.3	dld1	0.015	-0.0491053
PPP1CB	20	-0.65	dld1	0.0969	-0.06855
PPP1R10	17	-1.13	dld1	0.0049	-0.318474
PPP1R14B	16	-0.5	dld1	0.012
PPP1R16A	20	-0.16	dld1	0.0277	-0.0519487
PPP2R2C	19	0.27	dld1	-0.0222	0.00683333
PPP2R2D	18	0.19	dld1	-0.0416	0.17575
PPP2R3A	20	0.17	dld1	0.023	-0.0725
PPP2R5B	20	-0.19	dld1	0.012	-0.1123
PRDM1	19	0.08	dld1	0.0163	-0.211025
PRDM10	20	-0.27	dld1	0.012	0.0722105
PRDM11	19	0.22	dld1	0.012	-0.1393
PRDM12	18	0	dld1	0.0388	-0.07455
PRDM13	20	0.06	dld1	0.0163	0.18065
PRDM14	20	0.03	dld1	-0.0329	0.207211
PRDM15	18	0.42	dld1	0.021	-0.002
PRDM16	18	0.08	dld1	-0.0145	-0.0292
PRDM2	19	0.38	dld1	0.0319	-0.114444
PRDM4	20	0.03	dld1	0.032	0.0482632
PRDM5	17	0.25	dld1	0.0103	0.0834
PRDM6	20	0.07	dld1	0.0351	0.0299444
PRDM7	20	0.23	dld1	0.0202	-0.206067
PRDM8	20	0.16	dld1	0.0405	-0.263
PRDM9	19	0.3	dld1	-0.0102	-0.0391429
PREX1	16	0.26	dld1	0.0183	0.270222
PREX2	15	0.23	dld1	-0.0329	-0.04355
PRKAA1	20	-0.11	dld1	-0.0102	-0.0130377
PRKAA2	18	0.51	dld1	0.0319	0.0174063
PRKAB2	18	-0.07	dld1	0.0011	-0.119737
PRKAG3	20	0.07	dld1	0.0278	-0.146838
PRKAR1A	20	-0.35	dld1	0.015	-0.16
PRKCD	20	0.19	dld1	0.0398	-0.158154
PRKCDBP	20	0.28	dld1	0.5737	-0.12785
PRKCI	20	-0.16	dld1	0.023	0.0637436
PRKCQ	18	0.3	dld1	-0.0203	-0.0423846
PRKDC	20	-0.72	dld1	0.0246	-0.13135
PRKRA	18	-0.63	dld1	0.0174	0.01005
PRKRIP1	18	-0.43	dld1	0.0251	-0.0235
PRMT1	20	-1.54	dld1	0.0107	-0.341684
PRMT2	20	0.29	dld1		-0.2154
PRMT3	20	-0.12	dld1	0.012	-0.121
PRMT5	18	-2.28	dld1	0.0093	0.00345946
PRMT6	18	-0.31	dld1	0.0011	-0.03625
PRMT7	20	-0.08	dld1	0.0202	0.04045
PRMT8	20	0.2	dld1	0.0441	-0.406316
PROM1	18	0.16	dld1	-0.0222	-0.10105
PROP1	20	0.41	dld1	0.012	-0.09975
PROX1	20	0.24	dld1	0.0242	-0.17385
PRPF4	20	-1.76	dld1	0.0172	-0.0598
PRRG4	20	-0.22	dld1	0.012	-0.151571
PRRT1	18	-0.03	dld1	0.0049	-0.2908
PRRX1	18	0.3	dld1	0.0011	0.0272
PRSS12	20	-0.09	dld1	0.0103	-0.2311
PSMA4	20	-2.18	dld1	0.0116	-1.63015
PSMA6	20	-1.52	dld1	0.0093	-0.782
PSMA8	16	0.08	dld1	0.0071	-0.00763158
PSMC5	17	-1.61	dld1	0.015	-1.92611
PSPH	14	0.06	dld1		0.014425
PTAR1	20	-0.25	dld1	0.0172	-0.0496
PTF1A	17	-0.16	dld1	0.0016	0.05965
PTGER2	20	0.01	dld1	0.0093	-0.154316
PTGER4	20	-0.18	dld1	-0.0102	0.042375
PTGFR	16	0.29	dld1	0.0007	-0.197175
PTP4A3	16	-0.03	dld1	0.0277	-0.286526
PTPN3	20	0.13	dld1	0.0172	0.37165
PTPRD	20	-0.18	dld1	0.0172	-0.243079
PTPRZ1	20	0.16	dld1	0.0105	0.274632
PTTG1	20	-0.61	dld1	-0.0509	0.0159412
PURA	16	-0.02	dld1	0.0351	-0.192316
PURB	20	0.2	dld1	0.0171	0.113737
PUS7L	19	0.11	dld1	0.032	-0.02135
PWP1	18	-1.35	dld1	0.032	-0.151158
PWP2	20	-1.9	dld1	0.021	-0.159737
PWWP2A	20	0.31	dld1	-0.0509	-0.03
PYGB	20	-0.01	dld1	0.0183	-0.11395
PYGO1	18	0.11	dld1	0.0318	0.0597
PYGO2	20	0.06	dld1	0.0011	0.1149
RAB3GAP1	20	-0.09	dld1	-0.0289	-0.0039
RAB3GAP2	20	0.08	dld1	0.0073	-0.24315
RAB3IL1	19	0.19	dld1	0.012	-0.07355
RAB5A	17	0.35	dld1	0.0031	-0.152725
RABGAP1	20	0.21	dld1	0.0388	0.0984103
RAC1	22	-1.3	dld1	0.0109	-0.0238421
RAD23A	19	-0.37	dld1	0.026	0.0801579
RAD54B	20	-0.18	dld1	0.022	-0.22515
RAE1	18	-1.33	dld1	0.0183	-0.2519
RAG2	18	0.21	dld1	0.012	-0.05125
RAI1	18	0.08	dld1	0.015	0.28155
RAI14	20	0.25	dld1	-0.0102	-0.441632
RALA	18	0.06	dld1	0.0171	0.0291875
RALBP1	20	0.14	dld1	0.0071	0.0398947
RALGDS	20	0.01	dld1	0.0388	-0.0845714
RALGPS1	15	-0.09	dld1	0.0388	-0.0552222
RALGPS2	20	0.04	dld1	0.0011	-0.2474
RAN	20	-2.7	dld1	-0.0614	-2.14637
RANBP2	20	-1.09	dld1	0.0861
RAPGEF2	20	0.07	dld1	0.0103	-0.0846579
RAPGEF3	20	0.21	dld1	0.032	0.0689
RAPGEF4	20	0.05	dld1	0.0345	0.0989474
RAPGEF5	19	0.06	dld1	0.0171	0.0492778
RAPGEFL1	19	-0.32	dld1	0.015	-0.351118
RARA	17	-0.46	dld1	0.015	-0.00784211
RARB	19	0.38	dld1	0.0031	0.0661
RARG	20	-0.16	dld1	0.032	0.0689
RARRES1	20	0.12	dld1	0.023	0.13825
RASD2	20	-0.14	dld1	0.0203	-0.1772
RASGEF1A	19	0.11	dld1	-0.0529	-0.163632
RASGEF1B	20	0.16	dld1	0.0405	0.1471
RASGRF2	14	-0.05	dld1	0.0341	-0.186944
RASGRP1	20	-0.21	dld1	0.0455	-0.225111
RASGRP2	20	-0.46	dld1	0.012	-0.395
RASGRP3	20	0.44	dld1	0.5148	0.0498421
RASGRP4	20	-0.14	dld1	0.0107	-0.164278
RAX	20	0.08	dld1	-0.0135	-0.1078
RB1	18	0.64	dld1	0.0089	0.274487
RB1CC1	19	-0.83	dld1	-0.0329	-0.123217
RBBP4	20	-1.53	dld1	0.0319	0.000925
RBBP5	20	-1.42	dld1	0.0242	0.0813333
RBBP7	20	-0.13	dld1		-0.0909722
RBM24	19	0.29	dld1	0.0049	-0.033275
RBMX	20	-1.33	dld1		-0.0219231
RCBTB2	20	0.31	dld1	0.0089	-0.09785
RCC1	19	-1.93	dld1	0.0319	-0.232316
RCE1	18	0.01	dld1	0.012	0.130833
RCN2	21	0.32	dld1	0.0116	-0.1174
RCOR1	20	-0.41	dld1	0.0281	-0.1056
RCOR2	18	0.32	dld1	0.012	0.04635
RCOR3	20	0.04	dld1	0.0242	0.166842
REL	20	-0.02	dld1	0.5281	0.03425
RELA	18	-0.15	dld1	0.012	-0.303053
RELB	18	0.2	dld1	0.0107	0.05465
RERG	20	0.18	dld1	0.0441	-0.186026
REST	19	-0.06	dld1	0.0451	0.0906
RET	18	0.27	dld1	-0.0529	-0.0836316
REXO4	20	0.18	dld1	0.0388	-0.354474
RFFL	18	0.06	dld1	0.015	0.0018
RFWD2	20	-0.65	dld1	0.0011	-0.263389
RFWD3	20	-0.22	dld1	0.0202	0.0219
RFX3	20	0.39	dld1	0.0172	-0.4396
RFX5	20	-0.03	dld1	0.0011	-0.1279
RGL2	20	-0.08	dld1	0.0049	0.0293684
RGL3	20	-0.03	dld1	0.026	-0.232556
RGMA	20	0.09	dld1	0.0116	-0.205
RGS12	20	0.24	dld1	-0.0222	0.0464737
RGS5	20	0.01	dld1	0.0011	0.0228947
RHEB	18	-0.34	dld1	0.0105	-0.0586579
RHOA	20	-0.67	dld1	0.0398	0.0441622
RING1	20	-0.36	dld1	0.0049	-0.160675
RIOK2	20	-1.93	dld1	-0.0072	0.0841
RIOK3	19	0.02	dld1	0.0071	-0.0923684
RIPK1	20	0.32	dld1	-0.7609	0.0193158
RIPK2	20	-0.29	dld1	0.022	0.4047
RLIM	20	0.21	dld1		-0.0056875
RNF123	20	-0.25	dld1	0.0398	-0.3063
RNF17	16	0.11	dld1	0.0089	-0.0067
RNF183	20	-0.07	dld1	0.0172	-0.33555
RNF2	21	0.28	dld1	0.0011	0.175154
RNF20	20	-1.54	dld1	0.0172	-0.200417
RNF31	20	-0.1	dld1	0.0093	-0.110368
RNF4	20	-1.05	dld1	-0.0222	-0.166632
RNF40	19	-0.56	dld1	-0.0238	0.0234286
RNF43	20	0.36	dld1	0.015	-0.130538
RNMT	20	-0.8	dld1	0.0071	-0.04355
ROCK1	20	0.31	dld1	0.0071	0.192667
ROCK2	18	0.07	dld1	0.0868	0.171444
ROR1	20	0.34	dld1	0.0633	-0.05545
ROR2	19	0.28	dld1	0.0172	0.256368
RORA	19	0.02	dld1	0.0318	0.0837895
RORB	20	0.05	dld1	0.0172	0.217
RORC	20	-0.19	dld1	0.0011	-0.0013
RPH3A	20	0.24	dld1	0.032	0.25135
RPL7	20	-2.64	dld1	-0.0329	-1.70589
RPP38	19	-2.14	dld1	0.0016	0.0661
RPP40	19	-2.81	dld1	-0.7609	-0.75415
RPS18	20	-3.04	dld1	0.0049	-1.03563
RPS27L	20	0.02	dld1	0.0318	-0.0301053
RPS6KA4	19	-0.2	dld1	0.012	-0.120167
RPS6KA5	20	0.25	dld1	-0.037	-0.1608
RPS6KA6	19	0.3	dld1		0.1484
RPTOR	19	-2.06	dld1	0.015	0.0038
RREB1	20	0.17	dld1	0.0049	-0.6077
RRP9	20	-2.36	dld1	0.0398	-0.538261
RSF1	20	0	dld1	0.012	-0.0407143
RSPO3	24	0.41	dld1	0.048	-0.168222
RTN4RL2	19	0.02	dld1	0.012	-0.258895
RUFY1	19	-0.2	dld1	0.012	-0.1267
RUFY3	20	-0.01	dld1	-0.019	-0.2148
RUNX1	18	0.38	dld1	0.021	0.045025
RUNX1T1	19	0.12	dld1	0.022	0.17673
RUNX2	18	0.2	dld1	0.0163	-0.1127
RUNX3	18	0.45	dld1	0.0319	-0.0322105
RUVBL1	20	-2.83	dld1	0.023	-2.00289
RUVBL2	20	-2.42	dld1	0.0107	-1.54191
RXRA	20	0.19	dld1	0.0388	-0.256462
RXRB	20	0.07	dld1	0.0049	-0.407579
RXRG	20	-0.22	dld1	0.0011	-0.370526
SAFB	20	-0.59	dld1	0.026	-0.628088
SALL1	20	-0.09	dld1	-0.0238	-0.02955
SALL2	20	-0.24	dld1	0.0093	-0.00931579
SAMD7	19	0.16	dld1	0.023	-0.3319
SAP130	20	-0.51	dld1	-0.0289	-0.0918
SAP30	22	0.46	dld1	0.0103	0.00855556
SAP30L	20	0.54	dld1	-0.0509	-0.265474
SATB1	20	0.25	dld1	-0.0792	-0.21365
SATB2	20	-1.24	dld1	0.0439	-0.4414
SCMH1	19	-0.02	dld1	0.0319	0.15535
SCML1	20	0.17	dld1		-0.0733158
SCML2	20	0.23	dld1		-0.0486
SCN7A	20	-0.08	dld1	0.0345	-0.090025
SCRT1	20	-0.41	dld1	0.0277	0.0975
SDC1	18	-0.1	dld1	-0.0105	-0.0955263
SDC2	20	-0.08	dld1	0.022	-0.10795
SDHA	20	-0.54	dld1	0.0486	-0.0357
SDHB	18	-1.08	dld1	0.0319	0.00832432
SDK1	20	0.22	dld1	0.0109	0.04015
SEC31A	20	0.09	dld1	0.0405	0.0746842
SEC31B	19	0.26	dld1	0.0233	-0.0250526
SEH1L	20	-2.31	dld1	0.0071	-0.0905789
SEMA3F	19	-0.06	dld1	0.0398	-0.217625
SEMA5A	20	0.12	dld1	-0.0102	-0.177921
SEMA6A	20	-0.02	dld1	-0.0072	0.146487
SENP2	20	0.01	dld1	0.023	-0.1804
SERPINA5	19	0.13	dld1	-0.037	-0.0213182
SERPINB11	20	0.42	dld1	-0.0135	-0.084825
SERPINB3	20	0.32	dld1	-0.0135	-0.545619
SERPINE1	18	0.18	dld1	0.0251	0.20315
SERPINH1	20	0.21	dld1	0.012	-0.058125
SERTM1	17	0.17	dld1	0.0089	0.06405
SESN1	18	0.39	dld1	0.0163	0.124789
SETBP1	18	0.68	dld1	0.0124	0.235211
SETD1A	19	-1.37	dld1	-0.0238	0.235105
SETD1B	19	-0.21	dld1	0.032	0.0486842
SETD2	20	0.12	dld1	0.0398	0.1951
SETD3	20	0.25	dld1	-0.037	0.09995
SETD4	20	0.12	dld1	0.021	0.182889
SETD5	18	0.36	dld1	0.0418	0.0037
SETD6	20	-0.05	dld1	-0.0238	0.143368
SETD7	20	-0.3	dld1	0.0103	-0.07685
SETD8	18	-0.66	dld1	0.032	-0.0796316
SETDB1	17	-0.74	dld1	0.0011	-0.03135
SETDB2	19	0.32	dld1	0.0089	0.0514
SETMAR	19	0.17	dld1	0.0418	-0.376105
SF3B1	20	-1.4	dld1	0.0439	-2.5357
SFMBT1	20	0.06	dld1	0.0398	-0.105053
SFMBT2	20	0.41	dld1	-0.0203	-0.0023
SFN	20	-0.12	dld1	0.0319	-0.299789
SFPQ	18	-1.57	dld1	0.0319	-0.57595
SFT2D2	18	0.17	dld1	0.0011	0.051725
SFXN1	19	0.52	dld1	0.012	-0.0631316
SGCA	20	-0.25	dld1	0.015	-0.12645
SGCG	18	-0.12	dld1	0.0089	0.00679487
SGK3	19	0.31	dld1	-0.0329
SH2D3C	20	-0.14	dld1	0.0388	-0.04475
SH3BP4	18	0.54	dld1	0.0278	-0.0613
SH3RF1	20	0.14	dld1	0.0103	-0.140182
SHMT1	20	-0.01	dld1	0.015	-0.0171
SHOX2	20	0.09	dld1	0.023	-0.1556
SHPRH	20	0.26	dld1	0.048	0.013575
SIGLEC11	14	-0.08	dld1	0.0107	-0.055
SIM1	20	0.04	dld1	0.0163	-0.053
SIM2	19	0.37	dld1	0.021	-0.0063
SIN3A	20	-0.52	dld1	0.0318	-0.205947
SIRT1	19	-0.13	dld1	0.0233	0.0354091
SIRT2	20	-0.3	dld1	0.0107	0.0218889
SIRT3	20	-0.08	dld1	0.5737	0.0425
SIRT4	20	-0.34	dld1	0.032	-0.113632
SIRT5	20	0.33	dld1	0.0049	0.0609744
SIRT6	18	-0.33	dld1	0.026	0.18265
SIRT7	20	-0.73	dld1	0.015	-0.00685
SIX1	20	0.08	dld1	0.0093	0.122632
SIX2	20	0.03	dld1	0.6035	0.0428824
SIX3	20	-0.12	dld1	0.6035	-0.122
SIX4	19	0	dld1	0.0093	-0.438063
SIX5	20	-0.43	dld1	0.0107	-0.0632105
SIX6	18	0.07	dld1	0.0093	-0.175895
SKIL	18	0.31	dld1	0.023	-0.182359
SKP2	20	-0.35	dld1	-0.0102
SLAMF7	18	0.19	dld1	0.0011	-0.480275
SLAMF8	20	0.4	dld1	0.0011	-0.172154
SLC10A2	20	0.16	dld1	0.0089	-0.231947
SLC10A3	17	0.15	dld1		0.091075
SLC12A7	18	-0.06	dld1	0.0486	0.115231
SLC13A2	20	-0.15	dld1	0.015	-0.173
SLC13A3	20	0.09	dld1	0.0183	-0.081175
SLC16A5	19	0.15	dld1	0.015	-0.153278
SLC16A6	20	-0.04	dld1	0.015	-0.0336757
SLC19A1	20	-0.05	dld1	0.021	-0.274158
SLC1A2	20	0.11	dld1	0.012	-0.0425897
SLC20A2	20	0.11	dld1	0.0246	-0.2759
SLC22A3	18	0.14	dld1	-0.0706	-0.149175
SLC25A11	18	0.21	dld1	0.015	-0.16375
SLC26A3	20	-0.11	dld1	0.0251	-0.214487
SLC27A6	17	-0.03	dld1	0.0351	-0.132475
SLC29A1	18	0.11	dld1	0.0049	0.0214615
SLC2A1	18	-1.65	dld1	0.0319	-0.3147
SLC2A4RG	18	-0.02	dld1	0.0183	-0.0665
SLC34A2	20	0.26	dld1	-0.0222	0.0304167
SLC35E1	20	-0.54	dld1	0.026	-0.04475
SLC35E3	20	-0.06	dld1	0.032	-0.343889
SLC35F3	20	0.3	dld1	0.0073	-0.1466
SLC36A1	19	0.24	dld1	0.0351	-0.2752
SLC39A11	20	0.42	dld1	0.015	0.112684
SLC39A4	20	0.15	dld1	0.0277	-0.037175
SLC39A6	18	0.26	dld1	0.0071	-0.00635
SLC44A4	20	-0.15	dld1	0.0049	-0.154974
SLC44A5	18	0.2	dld1	0.0007	-0.139158
SLC4A11	20	0.21	dld1	0.0438	-0.187375
SLC4A4	20	0.09	dld1	-0.019	-0.2592
SLC4A8	18	-0.34	dld1	0.032	-0.23065
SLC5A11	20	0.14	dld1	-0.0238	-0.0127
SLC6A12	19	0.21	dld1		-0.141641
SLC6A14	19	0.38	dld1		-0.29827
SLC6A19	20	0.05	dld1	0.0486	-0.203375
SLC6A3	17	0.53	dld1	-0.1138	0.116333
SLC7A1	20	-1.23	dld1	0.0089	-0.501075
SLC7A8	20	0.35	dld1	0.0093	-0.0253077
SLC7A9	18	0.21	dld1	0.0107	-0.22045
SLN	24	0.19	dld1	0.012	0.0248205
SMAD1	20	0.18	dld1	0.0103	0.0956
SMAD2	20	0.06	dld1	-0.0135	0.0262222
SMAD3	18	0.2	dld1	0.0318	0.11305
SMAD4	18	-0.46	dld1	-0.0135	-0.0939231
SMAD5	20	-0.03	dld1	0.0351	-0.06385
SMAD6	18	-0.35	dld1	0.0318	-0.01745
SMAD7	19	-0.56	dld1	-0.0135	-0.0381579
SMAD9	18	0.06	dld1	0.0089	-0.182526
SMARCA1	20	0.29	dld1		0.0275385
SMARCA2	18	0.19	dld1	0.0172	0.0225
SMARCA4	15	-0.23	dld1	0.026	-0.457226
SMARCA5	19	-0.07	dld1	0.0103	0.0370909
SMARCAD1	18	0.05	dld1	0.0405	0.0603333
SMARCAL1	18	0.17	dld1	0.0278	0.201553
SMARCB1	20	-1.35	dld1	0.0203	-0.0379756
SMARCC1	16	-0.23	dld1	0.0398	-0.271412
SMARCC2	20	-0.39	dld1	0.032	0.237455
SMARCD1	20	-0.51	dld1	0.032	-0.0103947
SMARCD2	20	-0.33	dld1	0.015	-0.0315676
SMARCD3	20	0.41	dld1	0.0105	0.131028
SMARCE1	20	-0.33	dld1	0.015	-0.112184
SMNDC1	18	-1.01	dld1	0.0353	-0.212526
SMU1	20	-2.51	dld1	0.0172	-0.6438
SMURF1	20	-0.13	dld1	0.0251	0.0414474
SMURF2	17	0.19	dld1	0.015	-0.203846
SMYD1	18	0.43	dld1	0.0029	0.108421
SMYD2	15	0.59	dld1	0.0242	0.00355
SMYD3	18	0.42	dld1	0.0073	-0.0245
SMYD4	20	0.27	dld1	0.015	-0.0141667
SMYD5	20	-0.28	dld1	0.0029	0.0925789
SNAI1	20	-0.09	dld1	0.0183	0.00225641
SNAP25	19	0.38	dld1	0.0438	-0.37345
SNAP29	20	-0.07	dld1	0.0203	0.0417778
SNAPC4	20	-1.95	dld1	0.0388	0.0983
SND1	19	0.11	dld1	0.0105	-0.22575
SNRK	20	0.31	dld1	0.0398	0.185263
SNRPF	20	-1.15	dld1	0.032	0.0837647
SOD2	18	-1.69	dld1	0.0054	-0.0670526
SORCS2	20	-0.1	dld1	-0.0222	0.0711
SORL1	20	0.38	dld1	0.012	-0.03945
SOS2	20	0.05	dld1	0.0093	-0.0861579
SOST	20	-0.11	dld1	0.015	0.219526
SOX1	20	0.29	dld1	0.0518	-0.238474
SOX10	20	0.07	dld1	0.0203	-0.364842
SOX11	18	0.35	dld1	-0.0393	0.0492632
SOX12	20	0.05	dld1	0.0438	-0.00642105
SOX13	20	0.64	dld1	0.0242	-0.0661
SOX14	18	0.33	dld1	0.023	-0.158611
SOX15	20	0.18	dld1	0.015	-0.0214444
SOX17	18	-0.13	dld1	-0.0329	-0.3032
SOX2	20	0.22	dld1	0.023	-0.20887
SOX21	16	0.23	dld1	0.0089	0.0624211
SOX3	18	0.26	dld1		0.183
SOX30	20	0.06	dld1	-0.0509	-0.0699474
SOX4	20	0.19	dld1	0.0049	-0.0941
SOX6	20	0.03	dld1	0.012	-0.1065
SOX7	20	0.48	dld1	0.0246	0.0614118
SOX8	20	-0.1	dld1		-0.2775
SOX9	16	0.05	dld1	0.015	0.0192
SP1	20	-0.1	dld1	0.032	-0.4115
SP100	19	0.45	dld1	0.0278	-0.256044
SP110	20	0.13	dld1	0.0278	0.0512727
SP140	19	0.35	dld1	0.0278	-0.183971
SP3	20	-0.32	dld1	0.0345	-0.1309
SP4	20	-0.09	dld1	0.0171	-0.1333
SP7	18	0.21	dld1	0.032	0.123526
SPAG1	20	0.25	dld1	0.022	0.0227368
SPAG16	20	0.23	dld1	-0.0658	0.265632
SPEN	18	0.14	dld1	0.0319	0.15075
SPI1	18	0.02	dld1	0.012	-0.0321111
SPIB	17	0.04	dld1	0.0107	-0.00941176
SPP1	20	-0.04	dld1	0.0405	-0.0727895
SPRY4	19	0.3	dld1	0.0351	0.07955
SPRYD4	16	-0.21	dld1	0.032	-0.23455
SQSTM1	18	-0.09	dld1	0.012	-0.0542895
SRCAP	20	-0.62	dld1	-0.0238	0.12955
SREBF1	19	-0.29	dld1	0.015	-0.368842
SREBF2	20	0	dld1	0.0203	-0.67565
SRF	20	-1.23	dld1	0.0049	-0.22555
SRM	19	-0.39	dld1	0.0319	-0.0373684
SRY	20	0.31	dld1		-0.234579
SS18	18	0.57	dld1	0.0071	0.09355
SSH3	20	-0.14	dld1	0.012	-0.462525
SSRP1	20	-2	dld1	0.012	-0.1274
ST18	20	0.1	dld1	-0.0329	-0.27635
ST7	18	0.21	dld1	0.0105	-0.328725
STAT1	20	-0.3	dld1	0.0439	-0.0435
STAT2	19	0.01	dld1	0.032	-0.21175
STAT3	18	0.45	dld1	0.015	-0.0971
STAT4	20	0.07	dld1	0.0439	0.0247368
STAT5A	18	0.23	dld1	0.015	-0.11545
STAT5B	18	0.09	dld1	0.015	-0.1323
STAT6	19	0.04	dld1	0.032	-0.221474
STK10	19	0.18	dld1	0.012	-0.390712
STK11	20	0.03	dld1	0.026	-0.250143
STK31	18	-0.02	dld1	0.0171	0.07195
STK32B	20	0.15	dld1	-0.0222	-0.04195
STK33	20	0.14	dld1	0.5737	0.0412432
STK38L	16	0.33	dld1	-0.0127	-0.0723
STK4	19	0	dld1	0.0183	0.2361
STRN3	20	-0.22	dld1	0.0093	0.171789
STX12	20	0.26	dld1	0.0319	-0.2326
STXBP5	20	0.02	dld1	0.048	-0.1568
STXBP5L	20	-0.19	dld1	0.023	-0.0385789
SUDS3	21	-0.7	dld1	0.032	-0.0124
SUPT16H	20	-2.2	dld1	0.0093	-0.3065
SUPT6H	17	-1.06	dld1	0.015	-0.35
SUV39H1	18	0.15	dld1		-0.108541
SUV39H2	18	0.22	dld1	0.0016	0.237222
SUV420H1	20	-0.25	dld1	0.012	0.03545
SUV420H2	20	-0.02	dld1	0.0107	-0.174368
SUZ12	20	-0.9	dld1	0.015	-0.305051
SYMPK	20	-1.66	dld1	0.0107	-0.468684
SYNPO	18	0.29	dld1	0.0351	-0.07825
SYT4	18	0.36	dld1	0.0124	-0.186421
T	20	0.51	dld1	-0.0706	0.05995
TACR2	18	-0.12	dld1	0.0233	-0.1443
TADA2B	20	-0.56	dld1	-0.0222	-0.0023
TAF1	20	-1.77	dld1		-0.23231
TAF1L	20	0.16	dld1	0.0172	0.227063
TAF3	20	-2.25	dld1	-0.0203	-0.198368
TAF4B	20	-0.09	dld1	0.0071	-0.0554211
TAF5	18	-1.7	dld1	0.0233	-0.541737
TAF5L	20	-0.44	dld1	0.0073	0.26455
TAOK1	18	-0.04	dld1	0.015	0.031
TAOK2	20	-0.05	dld1	-0.0238	-0.192278
TARDBP	19	-1.02	dld1	0.0319	-0.2668
TAX1BP1	20	-0.03	dld1	0.0171	-0.11085
TBC1D22A	20	0.39	dld1	0.0203	-0.0738462
TBC1D2B	20	0.25	dld1	0.0116	-0.001725
TBK1	18	0.37	dld1	0.032	0.0793846
TBL1X	20	0.48	dld1		0.0857059
TBL1XR1	20	-0.09	dld1	0.023	0.3492
TBL1Y	20	0.73	dld1		-0.14875
TBL2	20	0.12	dld1	0.0251	0.0416842
TBL3	20	-1.37	dld1		-0.5824
TBP	20	-0.71	dld1	0.0194	-0.241667
TBPL1	20	0.02	dld1	0.048	-0.175684
TBR1	18	0.05	dld1	0.0345	-0.34625
TBX1	20	0.04	dld1	0.0203	-0.20655
TBX15	17	0.09	dld1	0.0011	-0.289789
TBX18	20	0.31	dld1	0.0163	-0.1515
TBX2	18	-0.23	dld1	0.015	-0.0535833
TBX20	20	0.19	dld1	0.0171	-0.15075
TBX21	20	-0.17	dld1	0.015	0.3234
TBX3	17	-0.27	dld1	0.032	0.0398
TBX4	18	0.23	dld1	0.015	-0.185971
TBX5	20	0.06	dld1	0.032	-0.111895
TCEAL1	17	0.18	dld1		-0.158211
TCERG1	16	-0.96	dld1	0.0351	-0.6835
TCF12	20	0.16	dld1	0.0318	-0.235
TCF19	18	0.26	dld1	0.0049	0.1354
TCF20	20	0.28	dld1	0.0203	-0.0968947
TCF21	20	0.33	dld1	0.048	0.00095
TCF3	19	0.53	dld1	0.026	0.117895
TCF4	20	0.3	dld1	-0.0135	-0.0916923
TCF7	20	-0.07	dld1	0.0351	-0.23815
TCF7L1	18	-0.09	dld1	0.0029	-0.1182
TCF7L2	18	-0.86	dld1	0.0353	-0.107421
TDRD1	20	0.28	dld1	0.0353	-0.05165
TDRD10	17	0.2	dld1	0.0011	-0.1538
TDRD12	19	-0.1	dld1	0.0107	0.0391579
TDRD3	20	0.39	dld1	0.0089	0.256526
TDRD5	18	0.11	dld1	0.0011	-0.2433
TDRD6	20	0.37	dld1	0.0163	-0.2415
TDRD7	20	0.11	dld1	0.0172	-0.0173684
TDRD9	20	0.42	dld1	0.0281	0.0331
TDRKH	20	-0.35	dld1	0.0011	-0.00878947
TEAD1	17	-0.24	dld1	0.012	-0.25641
TEAD2	18	-0.06	dld1	0.0107	-0.231821
TEAD4	18	-0.08	dld1	0.0441	-0.118323
TECPR1	20	-0.26	dld1	0.0251	-0.1952
TECPR2	19	-0.04	dld1	0.0281	-0.13585
TEF	20	-0.14	dld1	0.0203	0.01335
TELO2	16	-1.04	dld1		-0.1336
TEP1	20	0.32	dld1	0.0093	0.1245
TERF1	14	-0.06	dld1	-0.0329	-0.00684615
TERF2	20	-1.59	dld1	0.0202	-0.12155
TERF2IP	19	-0.16	dld1	0.0202	-0.139278
TERT	16	0.01	dld1	0.0099	0.03175
TET2	18	0.14	dld1	0.0405	0.016
TET3	20	0.37	dld1	0.0029	0.0312821
TEX15	18	0.34	dld1	0.0246	-0.0770526
TEX2	20	0.36	dld1	0.015	-0.12541
TFAP2A	20	0.2	dld1	0.0049	0.03295
TFAP2B	20	0.28	dld1	0.0163	-0.16295
TFAP2C	20	0.05	dld1	0.0183	0.123459
TFAP2D	20	-0.2	dld1	0.0163	0.14565
TFAP2E	19	-0.19	dld1	0.0319	-0.1775
TFDP1	20	-0.34	dld1	0.0518	-0.531053
TFDP2	20	0.07	dld1	0.023	-0.11675
TFE3	20	0.22	dld1		-0.0212
TFEB	20	-0.32	dld1	0.0049	-0.326105
TFEC	20	-0.03	dld1	0.0105	-0.203105
TFPT	18	0.32	dld1	0.0107	-0.248395
TFRC	20	-2.39	dld1	0.023	-1.01421
TGFB1	20	0.03	dld1	0.0107	-0.121528
TGFBR1	20	0.14	dld1	0.0172	-0.133579
TGFBR2	19	0.09	dld1	0.0905	0.122158
TGIF2	18	-0.23	dld1	0.0183	-0.205824
TGM2	20	0.21	dld1	0.0183	-0.3591
THBS1	19	0.09	dld1	0.0455	-0.006075
THBS2	20	0.4	dld1	0.0194	-0.248
THOC6	20	-0.51	dld1	0.0617	0.0778
THRA	19	-0.11	dld1	0.015	-0.192316
THRB	18	0.23	dld1	0.0031	0.04005
THRSP	20	0.01	dld1	0.012	-0.109
TIAM1	19	0.21	dld1	0.021	-0.157833
TIAM2	19	0.14	dld1	0.0054	0.06675
TICAM1	20	0	dld1	0.026	0.1601
TLCD1	16	-0.89	dld1	0.015	0.00445
TLE1	18	0.16	dld1	0.0172	0.1005
TLE2	20	0.2	dld1	0.026	-0.213579
TLE3	18	0.51	dld1	0.0318	-0.111278
TLL2	20	-0.01	dld1	0.0233	0.106526
TLX1	20	0.01	dld1	0.0233	-0.49175
TLX2	20	-0.23	dld1	0.0029	0.0512
TLX3	18	-0.05	dld1	0.012	-0.13935
TM2D2	19	-0.16	dld1	0.0246	-0.102162
TM4SF18	20	0.18	dld1	0.023	-0.033775
TM4SF4	20	-0.04	dld1	0.023	0.035025
TMEM100	19	0.2	dld1	0.015	-0.132462
TMEM117	20	0.13	dld1	0.032	-0.0312051
TMEM139	18	0.42	dld1	0.0105	-0.0126667
TMEM170B	18	0.13	dld1	0.0049	-0.387595
TMEM19	20	-0.11	dld1	0.032	-0.138
TMEM199	20	-2.2	dld1	0.015	-0.25859
TMEM30A	19	-0.08	dld1	0.0163	0.254474
TMEM41A	18	0.07	dld1	0.023	-0.0859474
TMEM52	20	-0.14	dld1	-0.0145	-0.0690513
TMEM64	20	0.27	dld1	0.022	0.031825
TMEM65	18	0.05	dld1	0.022	-0.132256
TMEM68	20	0.15	dld1	-0.0329	-0.18895
TMEM71	20	0.28	dld1	0.022	-0.0735897
TMLHE	16	0.5	dld1		-0.0296667
TMPRSS3	20	0.16	dld1	0.021	-0.38305
TMPRSS4	18	-0.08	dld1	0.012	0.02035
TNFAIP3	20	0.22	dld1	0.048	0.01495
TNFRSF10B	19	0.12	dld1	0.0246	-0.0867179
TNFRSF1A	20	-0.02	dld1	0.0441	0.05595
[truncated: 9,058 more rows]
